# Supplementary material
Source: publisher site journal article supplement (https://www.spandidos-publications.com/2108/downloadSupplementary)
Supplement: Supplementary file 1 [file downloadSupplementary]

## Sheet: Table SV
Table SV. Enrichment analysis of differentially expressed microRNAs in the categories biological process, cellular component and molecular function.
id	term	category	ListHits	ListTotal	PopHits	PopTotal	pval	padj	Enrichment_score	Gene
GO:0001869	negative regulation of complement activation, lectin pathway	biological_process	2	35266	2	98659	0	0	2.79757	NM_000014.4(A2M);XM_006719056.2(A2M);
GO:0043120	tumor necrosis factor binding	molecular_function	3	35266	3	98659	0	0	2.79757	NM_000014.4(A2M);NM_001065.3(TNFRSF1A);XM_006719056.2(A2M);
GO:0051793	medium-chain fatty acid catabolic process	biological_process	5	35266	5	98659	0	0	2.79757	NM_000016.5(ACADM);NM_001127328.2(ACADM);NM_001286042.1(ACADM);NM_001286043.1(ACADM);NM_001286044.1(ACADM);
GO:0003059	positive regulation of the force of heart contraction by epinephrine	biological_process	1	35266	1	98659	0	0	2.79757	NM_000024.5(ADRB2);
GO:0004941	beta2-adrenergic receptor activity	molecular_function	1	35266	1	98659	0	0	2.79757	NM_000024.5(ADRB2);
GO:0031713	B2 bradykinin receptor binding	molecular_function	1	35266	1	98659	0	0	2.79757	NM_000024.5(ADRB2);
GO:0071867	response to monoamine	biological_process	1	35266	1	98659	0	0	2.79757	NM_000024.5(ADRB2);
GO:1904925	positive regulation of mitophagy in response to mitochondrial depolarization	biological_process	1	35266	1	98659	0	0	2.79757	NM_000024.5(ADRB2);
GO:0015052	beta3-adrenergic receptor activity	molecular_function	1	35266	1	98659	0	0	2.79757	NM_000025.2(ADRB3);
GO:0004133	glycogen debranching enzyme activity	molecular_function	7	35266	7	98659	0	0	2.79757	NM_000028.2(AGL);NM_000642.2(AGL);NM_000643.2(AGL);NM_000644.2(AGL);NM_000645.2(AGL);NM_000646.2(AGL);XM_005270557.1(AGL);
GO:0004134	4-alpha-glucanotransferase activity	molecular_function	7	35266	7	98659	0	0	2.79757	NM_000028.2(AGL);NM_000642.2(AGL);NM_000643.2(AGL);NM_000644.2(AGL);NM_000645.2(AGL);NM_000646.2(AGL);XM_005270557.1(AGL);
GO:0004135	amylo-alpha-1,6-glucosidase activity	molecular_function	7	35266	7	98659	0	0	2.79757	NM_000028.2(AGL);NM_000642.2(AGL);NM_000643.2(AGL);NM_000644.2(AGL);NM_000645.2(AGL);NM_000646.2(AGL);XM_005270557.1(AGL);
GO:0043033	isoamylase complex	cellular_component	7	35266	7	98659	0	0	2.79757	NM_000028.2(AGL);NM_000642.2(AGL);NM_000643.2(AGL);NM_000644.2(AGL);NM_000645.2(AGL);NM_000646.2(AGL);XM_005270557.1(AGL);
GO:0002019	regulation of renal output by angiotensin	biological_process	6	35266	6	98659	0	0	2.79757	NM_000029.3(AGT);NM_000789.3(ACE);NM_001178057.1(ACE);NM_152830.2(ACE);XM_005257110.1(ACE);XM_006721737.2(ACE);
GO:0014873	response to muscle activity involved in regulation of muscle adaptation	biological_process	5	35266	5	98659	0	0	2.79757	NM_000029.3(AGT);NM_001098814.1(SRL);NM_002479.5(MYOG);NM_020451.2(SEPN1);NM_206926.1(SEPN1);
GO:0031703	type 2 angiotensin receptor binding	molecular_function	1	35266	1	98659	0	0	2.79757	NM_000029.3(AGT);
GO:0034104	negative regulation of tissue remodeling	biological_process	1	35266	1	98659	0	0	2.79757	NM_000029.3(AGT);
GO:0051969	regulation of transmission of nerve impulse	biological_process	1	35266	1	98659	0	0	2.79757	NM_000029.3(AGT);
GO:0070471	uterine smooth muscle contraction	biological_process	1	35266	1	98659	0	0	2.79757	NM_000029.3(AGT);
GO:1901201	regulation of extracellular matrix assembly	biological_process	3	35266	3	98659	0	0	2.79757	NM_000029.3(AGT);NM_017617.3(NOTCH1);XM_011518717.1(NOTCH1);
GO:1902632	positive regulation of membrane hyperpolarization	biological_process	1	35266	1	98659	0	0	2.79757	NM_000029.3(AGT);
GO:0004760	serine-pyruvate transaminase activity	molecular_function	1	35266	1	98659	0	0	2.79757	NM_000030.2(AGXT);
GO:0046724	oxalic acid secretion	biological_process	7	35266	7	98659	0	0	2.79757	NM_000030.2(AGXT);NM_001040454.1(SLC26A6);NM_001281732.1(SLC26A6);NM_001281733.1(SLC26A6);NM_022911.2(SLC26A6);NM_134263.2(SLC26A6);NM_134426.2(SLC26A6);
GO:0005325	peroxisomal fatty-acyl-CoA transporter activity	molecular_function	1	35266	1	98659	0	0	2.79757	NM_000033.3(ABCD1);
GO:0015919	peroxisomal membrane transport	biological_process	1	35266	1	98659	0	0	2.79757	NM_000033.3(ABCD1);
GO:0045720	negative regulation of integrin biosynthetic process	biological_process	5	35266	5	98659	0	0	2.79757	NM_000044.3(AR);NM_001011645.2(AR);NM_016192.2(TMEFF2);XM_005246437.2(TMEFF2);XM_011510890.1(TMEFF2);
GO:0004056	argininosuccinate lyase activity	molecular_function	4	35266	4	98659	0	0	2.79757	NM_000048.3(ASL);NM_001024943.1(ASL);NM_001024944.1(ASL);NM_001024946.1(ASL);
GO:0000053	argininosuccinate metabolic process	biological_process	4	35266	4	98659	0	0	2.79757	NM_000050.4(ASS1);NM_054012.3(ASS1);XM_005272200.2(ASS1);XM_011518705.1(ASS1);
GO:0004055	argininosuccinate synthase activity	molecular_function	4	35266	4	98659	0	0	2.79757	NM_000050.4(ASS1);NM_054012.3(ASS1);XM_005272200.2(ASS1);XM_011518705.1(ASS1);
GO:0021590	cerebellum maturation	biological_process	5	35266	5	98659	0	0	2.79757	NM_000068.3(CACNA1A);NM_001127221.1(CACNA1A);NM_001127222.1(CACNA1A);NM_001174080.1(CACNA1A);NM_023035.2(CACNA1A);
GO:0021679	cerebellar molecular layer development	biological_process	5	35266	5	98659	0	0	2.79757	NM_000068.3(CACNA1A);NM_001127221.1(CACNA1A);NM_001127222.1(CACNA1A);NM_001174080.1(CACNA1A);NM_023035.2(CACNA1A);
GO:0032353	negative regulation of hormone biosynthetic process	biological_process	5	35266	5	98659	0	0	2.79757	NM_000068.3(CACNA1A);NM_001127221.1(CACNA1A);NM_001127222.1(CACNA1A);NM_001174080.1(CACNA1A);NM_023035.2(CACNA1A);
GO:0004122	cystathionine beta-synthase activity	molecular_function	22	35266	22	98659	0	0	2.79757	NM_000071.2(CBS);NM_001178008.1(CBS);NM_001178009.1(CBS);XM_011529773.1(CBS);XM_011529774.1(CBS);XM_011529775.1(CBS);XM_011529776.1(CBS);XM_011529777.1(CBS);XM_011529778.1(CBS);XM_011529779.1(CBS);XM_011529781.1(CBS);XM_011529782.1(CBS);XM_011529783.1(CBS);XM_011529784.1(CBS);XM_011546094.1(LOC102724560);XM_011546095.1(LOC102724560);XM_011546096.1(LOC102724560);XM_011546097.1(LOC102724560);XM_011…
GO:0004124	cysteine synthase activity	molecular_function	14	35266	14	98659	0	0	2.79757	NM_000071.2(CBS);NM_001178008.1(CBS);NM_001178009.1(CBS);XM_011529773.1(CBS);XM_011529774.1(CBS);XM_011529775.1(CBS);XM_011529776.1(CBS);XM_011529777.1(CBS);XM_011529778.1(CBS);XM_011529779.1(CBS);XM_011529781.1(CBS);XM_011529782.1(CBS);XM_011529783.1(CBS);XM_011529784.1(CBS);
GO:0006535	cysteine biosynthetic process from serine	biological_process	22	35266	22	98659	0	0	2.79757	NM_000071.2(CBS);NM_001178008.1(CBS);NM_001178009.1(CBS);XM_011529773.1(CBS);XM_011529774.1(CBS);XM_011529775.1(CBS);XM_011529776.1(CBS);XM_011529777.1(CBS);XM_011529778.1(CBS);XM_011529779.1(CBS);XM_011529781.1(CBS);XM_011529782.1(CBS);XM_011529783.1(CBS);XM_011529784.1(CBS);XM_011546094.1(LOC102724560);XM_011546095.1(LOC102724560);XM_011546096.1(LOC102724560);XM_011546097.1(LOC102724560);XM_011…
GO:0050421	nitrite reductase (NO-forming) activity	molecular_function	14	35266	14	98659	0	0	2.79757	NM_000071.2(CBS);NM_001178008.1(CBS);NM_001178009.1(CBS);XM_011529773.1(CBS);XM_011529774.1(CBS);XM_011529775.1(CBS);XM_011529776.1(CBS);XM_011529777.1(CBS);XM_011529778.1(CBS);XM_011529779.1(CBS);XM_011529781.1(CBS);XM_011529782.1(CBS);XM_011529783.1(CBS);XM_011529784.1(CBS);
GO:0070025	carbon monoxide binding	molecular_function	14	35266	14	98659	0	0	2.79757	NM_000071.2(CBS);NM_001178008.1(CBS);NM_001178009.1(CBS);XM_011529773.1(CBS);XM_011529774.1(CBS);XM_011529775.1(CBS);XM_011529776.1(CBS);XM_011529777.1(CBS);XM_011529778.1(CBS);XM_011529779.1(CBS);XM_011529781.1(CBS);XM_011529782.1(CBS);XM_011529783.1(CBS);XM_011529784.1(CBS);
GO:0070026	nitric oxide binding	molecular_function	15	35266	15	98659	0	0	2.79757	NM_000071.2(CBS);NM_000852.3(GSTP1);NM_001178008.1(CBS);NM_001178009.1(CBS);XM_011529773.1(CBS);XM_011529774.1(CBS);XM_011529775.1(CBS);XM_011529776.1(CBS);XM_011529777.1(CBS);XM_011529778.1(CBS);XM_011529779.1(CBS);XM_011529781.1(CBS);XM_011529782.1(CBS);XM_011529783.1(CBS);XM_011529784.1(CBS);
GO:1904047	S-adenosyl-L-methionine binding	molecular_function	14	35266	14	98659	0	0	2.79757	NM_000071.2(CBS);NM_001178008.1(CBS);NM_001178009.1(CBS);XM_011529773.1(CBS);XM_011529774.1(CBS);XM_011529775.1(CBS);XM_011529776.1(CBS);XM_011529777.1(CBS);XM_011529778.1(CBS);XM_011529779.1(CBS);XM_011529781.1(CBS);XM_011529782.1(CBS);XM_011529783.1(CBS);XM_011529784.1(CBS);
GO:0001575	globoside metabolic process	biological_process	6	35266	6	98659	0	0	2.79757	NM_000086.2(CLN3);NM_001042432.1(CLN3);NM_001286104.1(CLN3);NM_001286105.1(CLN3);NM_001286109.1(CLN3);NM_001286110.1(CLN3);
GO:0035752	lysosomal lumen pH elevation	biological_process	6	35266	6	98659	0	0	2.79757	NM_000086.2(CLN3);NM_001042432.1(CLN3);NM_001286104.1(CLN3);NM_001286105.1(CLN3);NM_001286109.1(CLN3);NM_001286110.1(CLN3);
GO:1902618	cellular response to fluoride	biological_process	4	35266	4	98659	0	0	2.79757	NM_000088.3(COL1A1);XM_005257058.3(COL1A1);XM_005257059.3(COL1A1);XM_011524341.1(COL1A1);
GO:0010711	negative regulation of collagen catabolic process	biological_process	2	35266	2	98659	0	0	2.79757	NM_000099.3(CST3);NM_001288614.1(CST3);
GO:0060311	negative regulation of elastin catabolic process	biological_process	2	35266	2	98659	0	0	2.79757	NM_000099.3(CST3);NM_001288614.1(CST3);
GO:0003106	negative regulation of glomerular filtration by angiotensin	biological_process	2	35266	2	98659	0	0	2.79757	NM_000101.3(CYBA);XM_011522905.1(CYBA);
GO:0014895	smooth muscle hypertrophy	biological_process	2	35266	2	98659	0	0	2.79757	NM_000101.3(CYBA);XM_011522905.1(CYBA);
GO:0017004	cytochrome complex assembly	biological_process	2	35266	2	98659	0	0	2.79757	NM_000101.3(CYBA);XM_011522905.1(CYBA);
GO:0001300	chronological cell aging	biological_process	3	35266	3	98659	0	0	2.79757	NM_000118.3(ENG);NM_001114753.2(ENG);NM_001278138.1(ENG);
GO:0003273	cell migration involved in endocardial cushion formation	biological_process	7	35266	7	98659	0	0	2.79757	NM_000118.3(ENG);NM_001114753.2(ENG);NM_001278138.1(ENG);NM_003068.4(SNAI2);NM_003737.3(DCHS1);NM_017617.3(NOTCH1);XM_011518717.1(NOTCH1);
GO:0005072	transforming growth factor beta receptor, cytoplasmic mediator activity	molecular_function	4	35266	4	98659	0	0	2.79757	NM_000118.3(ENG);NM_001114753.2(ENG);NM_001278138.1(ENG);NM_004064.4(CDKN1B);
GO:0070483	detection of hypoxia	biological_process	5	35266	5	98659	0	0	2.79757	NM_000118.3(ENG);NM_001114753.2(ENG);NM_001278138.1(ENG);NM_003239.3(TGFB3);XM_005268028.1(TGFB3);
GO:0004325	ferrochelatase activity	molecular_function	4	35266	4	98659	0	0	2.79757	NM_000140.3(FECH);NM_001012515.2(FECH);XM_011525881.1(FECH);XM_011525882.1(FECH);
GO:0048640	negative regulation of developmental growth	biological_process	11	35266	11	98659	0	0	2.79757	NM_000142.4(FGFR3);NM_001163213.1(FGFR3);NM_022965.3(FGFR3);XM_006713868.1(FGFR3);XM_006713869.1(FGFR3);XM_006713870.1(FGFR3);XM_006713871.1(FGFR3);XM_006713872.1(FGFR3);XM_006713873.1(FGFR3);XM_011513420.1(FGFR3);XM_011513422.1(FGFR3);
GO:1902178	fibroblast growth factor receptor apoptotic signaling pathway	biological_process	11	35266	11	98659	0	0	2.79757	NM_000142.4(FGFR3);NM_001163213.1(FGFR3);NM_022965.3(FGFR3);XM_006713868.1(FGFR3);XM_006713869.1(FGFR3);XM_006713870.1(FGFR3);XM_006713871.1(FGFR3);XM_006713872.1(FGFR3);XM_006713873.1(FGFR3);XM_011513420.1(FGFR3);XM_011513422.1(FGFR3);
GO:0004333	fumarate hydratase activity	molecular_function	2	35266	2	98659	0	0	2.79757	NM_000143.3(FH);XM_011544132.1(FH);
GO:0006106	fumarate metabolic process	biological_process	2	35266	2	98659	0	0	2.79757	NM_000143.3(FH);XM_011544132.1(FH);
GO:0045239	tricarboxylic acid cycle enzyme complex	cellular_component	2	35266	2	98659	0	0	2.79757	NM_000143.3(FH);XM_011544132.1(FH);
GO:0005985	sucrose metabolic process	biological_process	5	35266	5	98659	0	0	2.79757	NM_000152.3(GAA);NM_001079803.1(GAA);NM_001079804.1(GAA);XM_005257193.1(GAA);XM_005257194.3(GAA);
GO:0043181	vacuolar sequestering	biological_process	5	35266	5	98659	0	0	2.79757	NM_000152.3(GAA);NM_001079803.1(GAA);NM_001079804.1(GAA);XM_005257193.1(GAA);XM_005257194.3(GAA);
GO:0006680	glucosylceramide catabolic process	biological_process	23	35266	23	98659	0	0	2.79757	NM_000157.3(GBA);NM_001005741.2(GBA);NM_001005742.2(GBA);NM_001171811.1(GBA);NM_001171812.1(GBA);NM_020944.2(GBA2);XM_005251526.3(GBA2);XM_006711270.1(GBA);XM_006716809.2(GBA2);XM_006726211.1(GBA);XM_011509407.1(GBA);XM_011517969.1(GBA2);XM_011517970.1(GBA2);XM_011517971.1(GBA2);XM_011517972.1(GBA2);XM_011517973.1(GBA2);XM_011517974.1(GBA2);XM_011517975.1(GBA2);XM_011517976.1(GBA2);XM_011517977.1…
GO:0015868	purine ribonucleotide transport	biological_process	3	35266	3	98659	0	0	2.79757	NM_000166.5(GJB1);NM_001097642.2(GJB1);XM_011530907.1(GJB1);
GO:0022018	lateral ganglionic eminence cell proliferation	biological_process	6	35266	6	98659	0	0	2.79757	NM_000168.5(GLI3);XM_005249703.1(GLI3);XM_005249704.2(GLI3);XM_011515272.1(GLI3);XM_011515273.1(GLI3);XM_011515274.1(GLI3);
GO:0060366	lambdoid suture morphogenesis	biological_process	6	35266	6	98659	0	0	2.79757	NM_000168.5(GLI3);XM_005249703.1(GLI3);XM_005249704.2(GLI3);XM_011515272.1(GLI3);XM_011515273.1(GLI3);XM_011515274.1(GLI3);
GO:0060367	sagittal suture morphogenesis	biological_process	6	35266	6	98659	0	0	2.79757	NM_000168.5(GLI3);XM_005249703.1(GLI3);XM_005249704.2(GLI3);XM_011515272.1(GLI3);XM_011515273.1(GLI3);XM_011515274.1(GLI3);
GO:0060594	mammary gland specification	biological_process	6	35266	6	98659	0	0	2.79757	NM_000168.5(GLI3);XM_005249703.1(GLI3);XM_005249704.2(GLI3);XM_011515272.1(GLI3);XM_011515273.1(GLI3);XM_011515274.1(GLI3);
GO:0060873	anterior semicircular canal development	biological_process	6	35266	6	98659	0	0	2.79757	NM_000168.5(GLI3);XM_005249703.1(GLI3);XM_005249704.2(GLI3);XM_011515272.1(GLI3);XM_011515273.1(GLI3);XM_011515274.1(GLI3);
GO:0060875	lateral semicircular canal development	biological_process	6	35266	6	98659	0	0	2.79757	NM_000168.5(GLI3);XM_005249703.1(GLI3);XM_005249704.2(GLI3);XM_011515272.1(GLI3);XM_011515273.1(GLI3);XM_011515274.1(GLI3);
GO:1903010	regulation of bone development	biological_process	6	35266	6	98659	0	0	2.79757	NM_000168.5(GLI3);XM_005249703.1(GLI3);XM_005249704.2(GLI3);XM_011515272.1(GLI3);XM_011515273.1(GLI3);XM_011515274.1(GLI3);
GO:0004375	glycine dehydrogenase (decarboxylating) activity	molecular_function	1	35266	1	98659	0	0	2.79757	NM_000170.2(GLDC);
GO:0014891	striated muscle atrophy	biological_process	28	35266	28	98659	0	0	2.79757	NM_000177.4(GSN);NM_001127662.1(GSN);NM_001127663.1(GSN);NM_001127664.1(GSN);NM_001127665.1(GSN);NM_001127666.1(GSN);NM_001127667.1(GSN);NM_001258029.1(GSN);NM_001258030.1(GSN);NM_002479.5(MYOG);NM_198252.2(GSN);XM_005251940.2(GSN);XM_005251943.1(GSN);XM_005251944.1(GSN);XM_005251945.3(GSN);XM_006717075.2(GSN);XM_006717079.1(GSN);XM_011518584.1(GSN);XM_011518585.1(GSN);XM_011518586.1(GSN);XM_0115…
GO:0097017	renal protein absorption	biological_process	27	35266	27	98659	0	0	2.79757	NM_000177.4(GSN);NM_001127662.1(GSN);NM_001127663.1(GSN);NM_001127664.1(GSN);NM_001127665.1(GSN);NM_001127666.1(GSN);NM_001127667.1(GSN);NM_001258029.1(GSN);NM_001258030.1(GSN);NM_198252.2(GSN);XM_005251940.2(GSN);XM_005251943.1(GSN);XM_005251944.1(GSN);XM_005251945.3(GSN);XM_006717075.2(GSN);XM_006717079.1(GSN);XM_011518584.1(GSN);XM_011518585.1(GSN);XM_011518586.1(GSN);XM_011518587.1(GSN);XM_01…
GO:1903689	regulation of wound healing, spreading of epidermal cells	biological_process	27	35266	27	98659	0	0	2.79757	NM_000177.4(GSN);NM_001127662.1(GSN);NM_001127663.1(GSN);NM_001127664.1(GSN);NM_001127665.1(GSN);NM_001127666.1(GSN);NM_001127667.1(GSN);NM_001258029.1(GSN);NM_001258030.1(GSN);NM_198252.2(GSN);XM_005251940.2(GSN);XM_005251943.1(GSN);XM_005251944.1(GSN);XM_005251945.3(GSN);XM_006717075.2(GSN);XM_006717079.1(GSN);XM_011518584.1(GSN);XM_011518585.1(GSN);XM_011518586.1(GSN);XM_011518587.1(GSN);XM_01…
GO:1903903	regulation of establishment of T cell polarity	biological_process	27	35266	27	98659	0	0	2.79757	NM_000177.4(GSN);NM_001127662.1(GSN);NM_001127663.1(GSN);NM_001127664.1(GSN);NM_001127665.1(GSN);NM_001127666.1(GSN);NM_001127667.1(GSN);NM_001258029.1(GSN);NM_001258030.1(GSN);NM_198252.2(GSN);XM_005251940.2(GSN);XM_005251943.1(GSN);XM_005251944.1(GSN);XM_005251945.3(GSN);XM_006717075.2(GSN);XM_006717079.1(GSN);XM_011518584.1(GSN);XM_011518585.1(GSN);XM_011518586.1(GSN);XM_011518587.1(GSN);XM_01…
GO:1903906	regulation of plasma membrane raft polarization	biological_process	27	35266	27	98659	0	0	2.79757	NM_000177.4(GSN);NM_001127662.1(GSN);NM_001127663.1(GSN);NM_001127664.1(GSN);NM_001127665.1(GSN);NM_001127666.1(GSN);NM_001127667.1(GSN);NM_001258029.1(GSN);NM_001258030.1(GSN);NM_198252.2(GSN);XM_005251940.2(GSN);XM_005251943.1(GSN);XM_005251944.1(GSN);XM_005251945.3(GSN);XM_006717075.2(GSN);XM_006717079.1(GSN);XM_011518584.1(GSN);XM_011518585.1(GSN);XM_011518586.1(GSN);XM_011518587.1(GSN);XM_01…
GO:1903909	regulation of receptor clustering	biological_process	27	35266	27	98659	0	0	2.79757	NM_000177.4(GSN);NM_001127662.1(GSN);NM_001127663.1(GSN);NM_001127664.1(GSN);NM_001127665.1(GSN);NM_001127666.1(GSN);NM_001127667.1(GSN);NM_001258029.1(GSN);NM_001258030.1(GSN);NM_198252.2(GSN);XM_005251940.2(GSN);XM_005251943.1(GSN);XM_005251944.1(GSN);XM_005251945.3(GSN);XM_006717075.2(GSN);XM_006717079.1(GSN);XM_011518584.1(GSN);XM_011518585.1(GSN);XM_011518586.1(GSN);XM_011518587.1(GSN);XM_01…
GO:1903923	positive regulation of protein processing in phagocytic vesicle	biological_process	29	35266	29	98659	0	0	2.79757	NM_000177.4(GSN);NM_001127662.1(GSN);NM_001127663.1(GSN);NM_001127664.1(GSN);NM_001127665.1(GSN);NM_001127666.1(GSN);NM_001127667.1(GSN);NM_001258029.1(GSN);NM_001258030.1(GSN);NM_002473.5(MYH9);NM_198252.2(GSN);XM_005251940.2(GSN);XM_005251943.1(GSN);XM_005251944.1(GSN);XM_005251945.3(GSN);XM_006717075.2(GSN);XM_006717079.1(GSN);XM_011518584.1(GSN);XM_011518585.1(GSN);XM_011518586.1(GSN);XM_0115…
GO:0004363	glutathione synthase activity	molecular_function	3	35266	3	98659	0	0	2.79757	NM_000178.2(GSS);XM_005260406.3(GSS);XM_011528796.1(GSS);
GO:0004418	hydroxymethylbilane synthase activity	molecular_function	8	35266	8	98659	0	0	2.79757	NM_000190.3(HMBS);NM_001024382.1(HMBS);NM_001258208.1(HMBS);NM_001258209.1(HMBS);XM_005271531.1(HMBS);XM_005271532.1(HMBS);XM_005271533.2(HMBS);XM_011542796.1(HMBS);
GO:0018160	peptidyl-pyrromethane cofactor linkage	biological_process	8	35266	8	98659	0	0	2.79757	NM_000190.3(HMBS);NM_001024382.1(HMBS);NM_001258208.1(HMBS);NM_001258209.1(HMBS);XM_005271531.1(HMBS);XM_005271532.1(HMBS);XM_005271533.2(HMBS);XM_011542796.1(HMBS);
GO:0003218	cardiac left ventricle formation	biological_process	5	35266	5	98659	0	0	2.79757	NM_000192.3(TBX5);NM_004821.2(HAND1);NM_080717.2(TBX5);NM_181486.2(TBX5);XM_005268531.1(HAND1);
GO:0060980	cell migration involved in coronary vasculogenesis	biological_process	3	35266	3	98659	0	0	2.79757	NM_000192.3(TBX5);NM_080717.2(TBX5);NM_181486.2(TBX5);
GO:1900117	regulation of execution phase of apoptosis	biological_process	3	35266	3	98659	0	0	2.79757	NM_000192.3(TBX5);NM_080717.2(TBX5);NM_181486.2(TBX5);
GO:0002017	regulation of blood volume by renal aldosterone	biological_process	5	35266	5	98659	0	0	2.79757	NM_000196.3(HSD11B2);NM_000498.3(CYP11B2);XM_011516877.1(CYP11B2);XM_011516878.1(CYP11B2);XM_011516879.1(CYP11B2);
GO:0001910	regulation of leukocyte mediated cytotoxicity	biological_process	1	35266	1	98659	0	0	2.79757	NM_000201.2(ICAM1);
GO:0002291	T cell activation via T cell receptor contact with antigen bound to MHC molecule on antigen presenting cell	biological_process	6	35266	6	98659	0	0	2.79757	NM_000201.2(ICAM1);NM_001114380.1(ITGAL);NM_002209.2(ITGAL);NM_019043.3(APBB1IP);XM_006717451.2(APBB1IP);XM_011519514.1(APBB1IP);
GO:0010477	response to sulfur dioxide	biological_process	1	35266	1	98659	0	0	2.79757	NM_000201.2(ICAM1);
GO:0045818	negative regulation of glycogen catabolic process	biological_process	4	35266	4	98659	0	0	2.79757	NM_000207.2(INS);NM_001185097.1(INS);NM_001185098.1(INS);NM_001291897.1(INS);
GO:0046631	alpha-beta T cell activation	biological_process	4	35266	4	98659	0	0	2.79757	NM_000207.2(INS);NM_001185097.1(INS);NM_001185098.1(INS);NM_001291897.1(INS);
GO:0034702	ion channel complex	cellular_component	11	35266	11	98659	0	0	2.79757	NM_000218.2(KCNQ1);NM_001127244.1(LRRC8A);NM_001127245.1(LRRC8A);NM_019594.3(LRRC8A);NM_181798.1(KCNQ1);XM_005252095.2(LRRC8A);XM_005252096.2(LRRC8A);XM_006717186.2(LRRC8A);XM_011518863.1(LRRC8A);XM_011518864.1(LRRC8A);XM_011518865.1(LRRC8A);
GO:1903817	negative regulation of voltage-gated potassium channel activity	biological_process	2	35266	2	98659	0	0	2.79757	NM_000218.2(KCNQ1);NM_181798.1(KCNQ1);
GO:0004607	phosphatidylcholine-sterol O-acyltransferase activity	molecular_function	1	35266	1	98659	0	0	2.79757	NM_000229.1(LCAT);
GO:0090107	regulation of high-density lipoprotein particle assembly	biological_process	1	35266	1	98659	0	0	2.79757	NM_000229.1(LCAT);
GO:0071641	negative regulation of macrophage inflammatory protein 1 alpha production	biological_process	2	35266	2	98659	0	0	2.79757	NM_000243.2(MEFV);NM_001198536.1(MEFV);
GO:0008705	methionine synthase activity	molecular_function	8	35266	8	98659	0	0	2.79757	NM_000254.2(MTR);NM_001291939.1(MTR);NM_001291940.1(MTR);XM_005273141.3(MTR);XM_006711769.2(MTR);XM_006711770.1(MTR);XM_011544193.1(MTR);XM_011544194.1(MTR);
GO:0042558	pteridine-containing compound metabolic process	biological_process	8	35266	8	98659	0	0	2.79757	NM_000254.2(MTR);NM_001291939.1(MTR);NM_001291940.1(MTR);XM_005273141.3(MTR);XM_006711769.2(MTR);XM_006711770.1(MTR);XM_011544193.1(MTR);XM_011544194.1(MTR);
GO:0051643	endoplasmic reticulum localization	biological_process	11	35266	11	98659	0	0	2.79757	NM_000259.3(MYO5A);NM_001142495.1(MYO5A);XM_005254397.2(MYO5A);XM_005254398.3(MYO5A);XM_011521606.1(MYO5A);XM_011521607.1(MYO5A);XM_011521608.1(MYO5A);XM_011521609.1(MYO5A);XM_011521610.1(MYO5A);XM_011521611.1(MYO5A);XM_011521612.1(MYO5A);
GO:0008456	alpha-N-acetylgalactosaminidase activity	molecular_function	3	35266	3	98659	0	0	2.79757	NM_000262.2(NAGA);XM_005261615.3(NAGA);XM_005261616.3(NAGA);
GO:0019377	glycolipid catabolic process	biological_process	3	35266	3	98659	0	0	2.79757	NM_000262.2(NAGA);XM_005261615.3(NAGA);XM_005261616.3(NAGA);
GO:0045685	regulation of glial cell differentiation	biological_process	18	35266	18	98659	0	0	2.79757	NM_000267.3(NF1);NM_001042492.2(NF1);NM_001128147.2(NF1);XM_005257983.1(NF1);XM_005257984.1(NF1);XM_006721922.1(NF1);XM_006721923.2(NF1);XM_006721924.1(NF1);XM_006721925.1(NF1);XM_006721926.2(NF1);XM_006721927.1(NF1);XM_006721928.2(NF1);XM_011524852.1(NF1);XM_011524853.1(NF1);XM_011524854.1(NF1);XM_011524855.1(NF1);XM_011524856.1(NF1);XM_011524857.1(NF1);
GO:0061534	gamma-aminobutyric acid secretion, neurotransmission	biological_process	18	35266	18	98659	0	0	2.79757	NM_000267.3(NF1);NM_001042492.2(NF1);NM_001128147.2(NF1);XM_005257983.1(NF1);XM_005257984.1(NF1);XM_006721922.1(NF1);XM_006721923.2(NF1);XM_006721924.1(NF1);XM_006721925.1(NF1);XM_006721926.2(NF1);XM_006721927.1(NF1);XM_006721928.2(NF1);XM_011524852.1(NF1);XM_011524853.1(NF1);XM_011524854.1(NF1);XM_011524855.1(NF1);XM_011524856.1(NF1);XM_011524857.1(NF1);
GO:0061535	glutamate secretion, neurotransmission	biological_process	18	35266	18	98659	0	0	2.79757	NM_000267.3(NF1);NM_001042492.2(NF1);NM_001128147.2(NF1);XM_005257983.1(NF1);XM_005257984.1(NF1);XM_006721922.1(NF1);XM_006721923.2(NF1);XM_006721924.1(NF1);XM_006721925.1(NF1);XM_006721926.2(NF1);XM_006721927.1(NF1);XM_006721928.2(NF1);XM_011524852.1(NF1);XM_011524853.1(NF1);XM_011524854.1(NF1);XM_011524855.1(NF1);XM_011524856.1(NF1);XM_011524857.1(NF1);
GO:0098597	observational learning	biological_process	18	35266	18	98659	0	0	2.79757	NM_000267.3(NF1);NM_001042492.2(NF1);NM_001128147.2(NF1);XM_005257983.1(NF1);XM_005257984.1(NF1);XM_006721922.1(NF1);XM_006721923.2(NF1);XM_006721924.1(NF1);XM_006721925.1(NF1);XM_006721926.2(NF1);XM_006721927.1(NF1);XM_006721928.2(NF1);XM_011524852.1(NF1);XM_011524853.1(NF1);XM_011524854.1(NF1);XM_011524855.1(NF1);XM_011524856.1(NF1);XM_011524857.1(NF1);
GO:0052745	inositol phosphate phosphatase activity	molecular_function	8	35266	8	98659	0	0	2.79757	NM_000276.3(OCRL);NM_001587.3(OCRL);XM_005262422.1(OCRL);XM_011531342.1(OCRL);XM_011531343.1(OCRL);XM_011531344.1(OCRL);XM_011531345.1(OCRL);XM_011531346.1(OCRL);
GO:0061360	optic chiasma development	biological_process	6	35266	6	98659	0	0	2.79757	NM_000278.3(PAX2);NM_001304569.1(PAX2);NM_003987.3(PAX2);NM_003988.3(PAX2);NM_003989.3(PAX2);NM_003990.3(PAX2);
GO:0072179	nephric duct formation	biological_process	10	35266	10	98659	0	0	2.79757	NM_000278.3(PAX2);NM_001002295.1(GATA3);NM_001304569.1(PAX2);NM_002051.2(GATA3);NM_003987.3(PAX2);NM_003988.3(PAX2);NM_003989.3(PAX2);NM_003990.3(PAX2);XM_005252442.2(GATA3);XM_005252443.3(GATA3);
GO:0072189	ureter development	biological_process	8	35266	8	98659	0	0	2.79757	NM_000278.3(PAX2);NM_001304569.1(PAX2);NM_001451.2(FOXF1);NM_003987.3(PAX2);NM_003988.3(PAX2);NM_003989.3(PAX2);NM_003990.3(PAX2);NM_153240.4(NPHP3);
GO:2000597	positive regulation of optic nerve formation	biological_process	6	35266	6	98659	0	0	2.79757	NM_000278.3(PAX2);NM_001304569.1(PAX2);NM_003987.3(PAX2);NM_003988.3(PAX2);NM_003989.3(PAX2);NM_003990.3(PAX2);
GO:0102009	proline dipeptidase activity	molecular_function	3	35266	3	98659	0	0	2.79757	NM_000285.3(PEPD);NM_001166056.1(PEPD);NM_001166057.1(PEPD);
GO:1990429	peroxisomal importomer complex	cellular_component	1	35266	1	98659	0	0	2.79757	NM_000286.2(PEX12);
GO:0005053	peroxisome matrix targeting signal-2 binding	molecular_function	4	35266	4	98659	0	0	2.79757	NM_000288.3(PEX7);XM_005267019.3(PEX7);XM_006715502.1(PEX7);XM_011535900.1(PEX7);
GO:0086043	bundle of His cell action potential	biological_process	15	35266	15	98659	0	0	2.79757	NM_000335.4(SCN5A);NM_001099404.1(SCN5A);NM_001099405.1(SCN5A);NM_001160160.1(SCN5A);NM_001160161.1(SCN5A);NM_001293306.2(SCN10A);NM_001293307.2(SCN10A);NM_006514.3(SCN10A);NM_198056.2(SCN5A);XM_005265371.2(SCN10A);XM_006713282.2(SCN5A);XM_011533991.1(SCN5A);XM_011533992.1(SCN5A);XM_011533993.1(SCN10A);XM_011533994.1(SCN10A);
GO:0086048	membrane depolarization during bundle of His cell action potential	biological_process	9	35266	9	98659	0	0	2.79757	NM_000335.4(SCN5A);NM_001099404.1(SCN5A);NM_001099405.1(SCN5A);NM_001160160.1(SCN5A);NM_001160161.1(SCN5A);NM_198056.2(SCN5A);XM_006713282.2(SCN5A);XM_011533991.1(SCN5A);XM_011533992.1(SCN5A);
GO:0086060	voltage-gated sodium channel activity involved in AV node cell action potential	molecular_function	9	35266	9	98659	0	0	2.79757	NM_000335.4(SCN5A);NM_001099404.1(SCN5A);NM_001099405.1(SCN5A);NM_001160160.1(SCN5A);NM_001160161.1(SCN5A);NM_198056.2(SCN5A);XM_006713282.2(SCN5A);XM_011533991.1(SCN5A);XM_011533992.1(SCN5A);
GO:0086061	voltage-gated sodium channel activity involved in bundle of His cell action potential	molecular_function	9	35266	9	98659	0	0	2.79757	NM_000335.4(SCN5A);NM_001099404.1(SCN5A);NM_001099405.1(SCN5A);NM_001160160.1(SCN5A);NM_001160161.1(SCN5A);NM_198056.2(SCN5A);XM_006713282.2(SCN5A);XM_011533991.1(SCN5A);XM_011533992.1(SCN5A);
GO:0086063	voltage-gated sodium channel activity involved in SA node cell action potential	molecular_function	9	35266	9	98659	0	0	2.79757	NM_000335.4(SCN5A);NM_001099404.1(SCN5A);NM_001099405.1(SCN5A);NM_001160160.1(SCN5A);NM_001160161.1(SCN5A);NM_198056.2(SCN5A);XM_006713282.2(SCN5A);XM_011533991.1(SCN5A);XM_011533992.1(SCN5A);
GO:0002683	negative regulation of immune system process	biological_process	1	35266	1	98659	0	0	2.79757	NM_000346.3(SOX9);
GO:0003413	chondrocyte differentiation involved in endochondral bone morphogenesis	biological_process	6	35266	6	98659	0	0	2.79757	NM_000346.3(SOX9);NM_004655.3(AXIN2);XM_011525319.1(AXIN2);XM_011525320.1(AXIN2);XM_011525321.1(AXIN2);XM_011525322.1(AXIN2);
GO:0003415	chondrocyte hypertrophy	biological_process	2	35266	2	98659	0	0	2.79757	NM_000346.3(SOX9);NM_016626.4(MEX3C);
GO:0035622	intrahepatic bile duct development	biological_process	1	35266	1	98659	0	0	2.79757	NM_000346.3(SOX9);
GO:0060517	epithelial cell proliferation involved in prostatic bud elongation	biological_process	1	35266	1	98659	0	0	2.79757	NM_000346.3(SOX9);
GO:0060784	regulation of cell proliferation involved in tissue homeostasis	biological_process	1	35266	1	98659	0	0	2.79757	NM_000346.3(SOX9);
GO:0061046	regulation of branching involved in lung morphogenesis	biological_process	1	35266	1	98659	0	0	2.79757	NM_000346.3(SOX9);
GO:0070168	negative regulation of biomineral tissue development	biological_process	3	35266	3	98659	0	0	2.79757	NM_000346.3(SOX9);NM_000820.3(GAS6);NM_001622.2(AHSG);
GO:0072190	ureter urothelium development	biological_process	3	35266	3	98659	0	0	2.79757	NM_000346.3(SOX9);NM_145260.2(OSR1);XM_006711942.2(OSR1);
GO:0072193	ureter smooth muscle cell differentiation	biological_process	6	35266	6	98659	0	0	2.79757	NM_000346.3(SOX9);NM_001202.3(BMP4);NM_005982.3(SIX1);NM_130850.2(BMP4);NM_130851.2(BMP4);XM_005268015.3(BMP4);
GO:2000794	regulation of epithelial cell proliferation involved in lung morphogenesis	biological_process	1	35266	1	98659	0	0	2.79757	NM_000346.3(SOX9);
GO:0008281	sulfonylurea receptor activity	molecular_function	4	35266	4	98659	0	0	2.79757	NM_000352.4(ABCC8);NM_001287174.1(ABCC8);NM_005691.3(ABCC9);NM_020297.3(ABCC9);
GO:0004838	L-tyrosine:2-oxoglutarate aminotransferase activity	molecular_function	1	35266	1	98659	0	0	2.79757	NM_000353.2(TAT);
GO:0004511	tyrosine 3-monooxygenase activity	molecular_function	4	35266	4	98659	0	0	2.79757	NM_000360.3(TH);NM_199292.2(TH);NM_199293.2(TH);XM_011520335.1(TH);
GO:0006585	dopamine biosynthetic process from tyrosine	biological_process	4	35266	4	98659	0	0	2.79757	NM_000360.3(TH);NM_199292.2(TH);NM_199293.2(TH);XM_011520335.1(TH);
GO:0016137	glycoside metabolic process	biological_process	4	35266	4	98659	0	0	2.79757	NM_000360.3(TH);NM_199292.2(TH);NM_199293.2(TH);XM_011520335.1(TH);
GO:0034617	tetrahydrobiopterin binding	molecular_function	19	35266	19	98659	0	0	2.79757	NM_000360.3(TH);NM_000603.4(NOS3);NM_000620.4(NOS1);NM_000625.4(NOS2);NM_001160109.1(NOS3);NM_001160110.1(NOS3);NM_001160111.1(NOS3);NM_001204213.1(NOS1);NM_001204214.1(NOS1);NM_001204218.1(NOS1);NM_199292.2(TH);NM_199293.2(TH);XM_006716002.2(NOS3);XM_011520335.1(TH);XM_011524859.1(NOS2);XM_011524860.1(NOS2);XM_011524861.1(NOS2);XM_011524862.1(NOS2);XM_011538398.1(NOS1);
GO:0035900	response to isolation stress	biological_process	4	35266	4	98659	0	0	2.79757	NM_000360.3(TH);NM_199292.2(TH);NM_199293.2(TH);XM_011520335.1(TH);
GO:0042214	terpene metabolic process	biological_process	4	35266	4	98659	0	0	2.79757	NM_000360.3(TH);NM_199292.2(TH);NM_199293.2(TH);XM_011520335.1(TH);
GO:0042745	circadian sleep/wake cycle	biological_process	13	35266	13	98659	0	0	2.79757	NM_000360.3(TH);NM_000687.2(AHCY);NM_001161766.1(AHCY);NM_199292.2(TH);NM_199293.2(TH);XM_005260316.3(AHCY);XM_005260317.1(AHCY);XM_011520335.1(TH);XM_011528656.1(AHCY);XM_011528657.1(AHCY);XM_011528658.1(AHCY);XM_011528659.1(AHCY);XM_011528660.1(AHCY);
GO:1904684	negative regulation of metalloendopeptidase activity	biological_process	3	35266	3	98659	0	0	2.79757	NM_000362.4(TIMP3);NM_021111.2(RECK);XM_011518053.1(RECK);
GO:0001980	regulation of systemic arterial blood pressure by ischemic conditions	biological_process	1	35266	1	98659	0	0	2.79757	NM_000363.4(TNNI3);
GO:0004807	triose-phosphate isomerase activity	molecular_function	3	35266	3	98659	0	0	2.79757	NM_000365.5(TPI1);NM_001159287.1(TPI1);NM_001258026.1(TPI1);
GO:0008119	thiopurine S-methyltransferase activity	molecular_function	6	35266	6	98659	0	0	2.79757	NM_000367.3(TPMT);NM_001205254.1(OCLN);NM_001205255.1(OCLN);NM_002538.3(OCLN);XM_011514839.1(TPMT);XM_011514840.1(TPMT);
GO:0003974	UDP-N-acetylglucosamine 4-epimerase activity	molecular_function	3	35266	3	98659	0	0	2.79757	NM_000403.3(GALE);NM_001008216.1(GALE);NM_001127621.1(GALE);
GO:0003978	UDP-glucose 4-epimerase activity	molecular_function	3	35266	3	98659	0	0	2.79757	NM_000403.3(GALE);NM_001008216.1(GALE);NM_001127621.1(GALE);
GO:0005889	hydrogen:potassium-exchanging ATPase complex	cellular_component	4	35266	4	98659	0	0	2.79757	NM_000405.4(GM2A);NM_001167607.1(GM2A);NM_001185085.1(ATP12A);NM_001676.5(ATP12A);
GO:0030290	sphingolipid activator protein activity	molecular_function	2	35266	2	98659	0	0	2.79757	NM_000405.4(GM2A);NM_001167607.1(GM2A);
GO:0032428	beta-N-acetylgalactosaminidase activity	molecular_function	2	35266	2	98659	0	0	2.79757	NM_000405.4(GM2A);NM_001167607.1(GM2A);
GO:0030249	guanylate cyclase regulator activity	molecular_function	6	35266	6	98659	0	0	2.79757	NM_000409.3(GUCA1A);XM_006715073.2(GUCA1A);XM_011514536.1(GUCA1A);XM_011514537.1(GUCA1A);XM_011514538.1(GUCA1A);XM_011514539.1(GUCA1A);
GO:0002664	regulation of T cell tolerance induction	biological_process	2	35266	2	98659	0	0	2.79757	NM_000417.2(IL2RA);XM_005252446.1(IL2RA);
GO:0004496	mevalonate kinase activity	molecular_function	4	35266	4	98659	0	0	2.79757	NM_000431.3(MVK);NM_001114185.2(MVK);NM_001301182.1(MVK);XM_011538372.1(MVK);
GO:0072104	glomerular capillary formation	biological_process	6	35266	6	98659	0	0	2.79757	NM_000435.2(NOTCH3);NM_001202.3(BMP4);NM_130850.2(BMP4);NM_130851.2(BMP4);XM_005259924.3(NOTCH3);XM_005268015.3(BMP4);
GO:0072011	glomerular endothelium development	biological_process	11	35266	11	98659	0	0	2.79757	NM_000442.4(PECAM1);NM_001025109.1(CD34);NM_001773.2(CD34);NM_005251.2(FOXC2);XM_005276880.1(PECAM1);XM_005276881.1(PECAM1);XM_005276882.1(PECAM1);XM_005276883.1(PECAM1);XM_011510170.1(CD34);XM_011524889.1(PECAM1);XM_011524890.1(PECAM1);
GO:0008507	sodium:iodide symporter activity	molecular_function	1	35266	1	98659	0	0	2.79757	NM_000453.2(SLC5A5);
GO:0032878	regulation of establishment or maintenance of cell polarity	biological_process	25	35266	25	98659	0	0	2.79757	NM_000459.4(TEK);NM_001015002.1(LLGL2);NM_001031803.1(LLGL2);NM_001290077.1(TEK);NM_001290078.1(TEK);NM_004140.3(LLGL1);NM_004524.2(LLGL2);XM_005251561.1(TEK);XM_005251563.1(TEK);XM_006721897.2(LLGL2);XM_011523849.1(LLGL1);XM_011523850.1(LLGL1);XM_011523851.1(LLGL1);XM_011523852.1(LLGL1);XM_011523853.1(LLGL1);XM_011523854.1(LLGL1);XM_011523855.1(LLGL1);XM_011523856.1(LLGL1);XM_011524801.1(LLGL2);…
GO:2000351	regulation of endothelial cell apoptotic process	biological_process	5	35266	5	98659	0	0	2.79757	NM_000459.4(TEK);NM_001290077.1(TEK);NM_001290078.1(TEK);XM_005251561.1(TEK);XM_005251563.1(TEK);
GO:0008050	female courtship behavior	biological_process	21	35266	21	98659	0	0	2.79757	NM_000461.4(THRB);NM_001128176.2(THRB);NM_001128177.1(THRB);NM_001190918.1(THRA);NM_001190919.1(THRA);NM_001252634.1(THRB);NM_003250.5(THRA);NM_199334.3(THRA);XM_005265421.3(THRB);XM_005265423.3(THRB);XM_005265424.2(THRB);XM_006713317.2(THRB);XM_006713318.2(THRB);XM_011534046.1(THRB);XM_011534047.1(THRB);XM_011534048.1(THRB);XM_011534049.1(THRB);XM_011534050.1(THRB);XM_011534051.1(THRB);XM_011534…
GO:0035037	sperm entry	biological_process	15	35266	15	98659	0	0	2.79757	NM_000462.3(UBE3A);NM_130838.1(UBE3A);NM_130839.2(UBE3A);XM_005268267.3(UBE3A);XM_005268268.3(UBE3A);XM_005268269.3(UBE3A);XM_005268270.3(UBE3A);XM_005268271.3(UBE3A);XM_006720673.2(UBE3A);XM_006720674.2(UBE3A);XM_006720675.2(UBE3A);XM_006720676.2(UBE3A);XM_011521994.1(UBE3A);XM_011521995.1(UBE3A);XM_011521996.1(UBE3A);
GO:2000058	regulation of protein ubiquitination involved in ubiquitin-dependent protein catabolic process	biological_process	23	35266	23	98659	0	0	2.79757	NM_000462.3(UBE3A);NM_004103.4(PTK2B);NM_130838.1(UBE3A);NM_130839.2(UBE3A);NM_173174.2(PTK2B);NM_173175.2(PTK2B);NM_173176.2(PTK2B);XM_005268267.3(UBE3A);XM_005268268.3(UBE3A);XM_005268269.3(UBE3A);XM_005268270.3(UBE3A);XM_005268271.3(UBE3A);XM_005273447.3(PTK2B);XM_005273448.3(PTK2B);XM_006720673.2(UBE3A);XM_006720674.2(UBE3A);XM_006720675.2(UBE3A);XM_006720676.2(UBE3A);XM_011521994.1(UBE3A);XM…
GO:0003183	mitral valve morphogenesis	biological_process	14	35266	14	98659	0	0	2.79757	NM_000474.3(TWIST1);NM_001105.4(ACVR1);NM_001111067.2(ACVR1);NM_003107.2(SOX4);NM_004428.2(EFNA1);NM_182685.1(EFNA1);XM_005244940.3(EFNA1);XM_005246939.2(ACVR1);XM_005246940.2(ACVR1);XM_006712825.2(ACVR1);XM_011512106.1(ACVR1);XM_011512107.1(ACVR1);XM_011512108.1(ACVR1);XM_011515496.1(TWIST1);
GO:2000793	cell proliferation involved in heart valve development	biological_process	2	35266	2	98659	0	0	2.79757	NM_000474.3(TWIST1);XM_011515496.1(TWIST1);
GO:2000802	positive regulation of endocardial cushion to mesenchymal transition involved in heart valve formation	biological_process	2	35266	2	98659	0	0	2.79757	NM_000474.3(TWIST1);XM_011515496.1(TWIST1);
GO:0032448	DNA hairpin binding	molecular_function	1	35266	1	98659	0	0	2.79757	NM_000475.4(NR0B1);
GO:0033144	negative regulation of intracellular steroid hormone receptor signaling pathway	biological_process	2	35266	2	98659	0	0	2.79757	NM_000475.4(NR0B1);NM_004343.3(CALR);
GO:0035258	steroid hormone receptor binding	molecular_function	1	35266	1	98659	0	0	2.79757	NM_000475.4(NR0B1);
GO:2000355	negative regulation of ovarian follicle development	biological_process	1	35266	1	98659	0	0	2.79757	NM_000479.3(AMH);
GO:0031895	V1B vasopressin receptor binding	molecular_function	2	35266	2	98659	0	0	2.79757	NM_000490.4(AVP);XM_011529267.1(AVP);
GO:0004507	steroid 11-beta-monooxygenase activity	molecular_function	13	35266	13	98659	0	0	2.79757	NM_000497.3(CYP11B1);NM_000498.3(CYP11B2);NM_001026213.1(CYP11B1);XM_011516870.1(CYP11B1);XM_011516871.1(CYP11B1);XM_011516872.1(CYP11B1);XM_011516873.1(CYP11B1);XM_011516874.1(CYP11B1);XM_011516875.1(CYP11B1);XM_011516876.1(CYP11B1);XM_011516877.1(CYP11B2);XM_011516878.1(CYP11B2);XM_011516879.1(CYP11B2);
GO:0047783	corticosterone 18-monooxygenase activity	molecular_function	13	35266	13	98659	0	0	2.79757	NM_000497.3(CYP11B1);NM_000498.3(CYP11B2);NM_001026213.1(CYP11B1);XM_011516870.1(CYP11B1);XM_011516871.1(CYP11B1);XM_011516872.1(CYP11B1);XM_011516873.1(CYP11B1);XM_011516874.1(CYP11B1);XM_011516875.1(CYP11B1);XM_011516876.1(CYP11B1);XM_011516877.1(CYP11B2);XM_011516878.1(CYP11B2);XM_011516879.1(CYP11B2);
GO:0072677	eosinophil migration	biological_process	1	35266	1	98659	0	0	2.79757	NM_000502.4(EPX);
GO:0060602	branch elongation of an epithelium	biological_process	4	35266	4	98659	0	0	2.79757	NM_000523.3(HOXD13);XM_011511068.1(HOXD13);XM_011511069.1(HOXD13);XM_011511070.1(HOXD13);
GO:0007198	adenylate cyclase-inhibiting serotonin receptor signaling pathway	biological_process	2	35266	2	98659	0	0	2.79757	NM_000524.3(HTR1A);NM_000863.1(HTR1B);
GO:0070305	response to cGMP	biological_process	1	35266	1	98659	0	0	2.79757	NM_000537.3(REN);
GO:0035623	renal glucose absorption	biological_process	3	35266	3	98659	0	0	2.79757	NM_000545.5(HNF1A);XM_005253931.2(HNF1A);XM_011538713.1(HNF1A);
GO:0097252	oligodendrocyte apoptotic process	biological_process	17	35266	17	98659	0	0	2.79757	NM_000546.5(TP53);NM_001126112.2(TP53);NM_001126113.2(TP53);NM_001126114.2(TP53);NM_001126115.1(TP53);NM_001126116.1(TP53);NM_001126117.1(TP53);NM_001126118.1(TP53);NM_001276695.1(TP53);NM_001276696.1(TP53);NM_001276697.1(TP53);NM_001276698.1(TP53);NM_001276699.1(TP53);NM_001276760.1(TP53);NM_001276761.1(TP53);NM_014452.4(TNFRSF21);XM_011514495.1(TNFRSF21);
GO:0046534	positive regulation of photoreceptor cell differentiation	biological_process	1	35266	1	98659	0	0	2.79757	NM_000554.4(CRX);
GO:0001861	complement component C4b receptor activity	molecular_function	4	35266	4	98659	0	0	2.79757	NM_000573.3(CR1);NM_000651.4(CR1);XM_006711166.2(CR1);XM_011509205.1(CR1);
GO:0004877	complement component C3b receptor activity	molecular_function	4	35266	4	98659	0	0	2.79757	NM_000573.3(CR1);NM_000651.4(CR1);XM_006711166.2(CR1);XM_011509205.1(CR1);
GO:0006876	cellular cadmium ion homeostasis	biological_process	1	35266	1	98659	0	0	2.79757	NM_000578.3(SLC11A1);
GO:0015707	nitrite transport	biological_process	1	35266	1	98659	0	0	2.79757	NM_000578.3(SLC11A1);
GO:0032632	interleukin-3 production	biological_process	1	35266	1	98659	0	0	2.79757	NM_000578.3(SLC11A1);
GO:0043091	L-arginine import	biological_process	1	35266	1	98659	0	0	2.79757	NM_000578.3(SLC11A1);
GO:0045342	MHC class II biosynthetic process	biological_process	1	35266	1	98659	0	0	2.79757	NM_000578.3(SLC11A1);
GO:0048002	antigen processing and presentation of peptide antigen	biological_process	3	35266	3	98659	0	0	2.79757	NM_000578.3(SLC11A1);NM_001199739.1(CTSS);NM_004079.4(CTSS);
GO:0051139	metal ion:proton antiporter activity	molecular_function	1	35266	1	98659	0	0	2.79757	NM_000578.3(SLC11A1);
GO:0070839	divalent metal ion export	biological_process	1	35266	1	98659	0	0	2.79757	NM_000578.3(SLC11A1);
GO:0001847	opsonin receptor activity	molecular_function	4	35266	4	98659	0	0	2.79757	NM_000591.3(CD14);NM_001040021.2(CD14);NM_001174104.1(CD14);NM_001174105.1(CD14);
GO:0004517	nitric-oxide synthase activity	molecular_function	15	35266	15	98659	0	0	2.79757	NM_000603.4(NOS3);NM_000620.4(NOS1);NM_000625.4(NOS2);NM_001160109.1(NOS3);NM_001160110.1(NOS3);NM_001160111.1(NOS3);NM_001204213.1(NOS1);NM_001204214.1(NOS1);NM_001204218.1(NOS1);XM_006716002.2(NOS3);XM_011524859.1(NOS2);XM_011524860.1(NOS2);XM_011524861.1(NOS2);XM_011524862.1(NOS2);XM_011538398.1(NOS1);
GO:0014806	smooth muscle hyperplasia	biological_process	6	35266	6	98659	0	0	2.79757	NM_000603.4(NOS3);NM_001160109.1(NOS3);NM_001160110.1(NOS3);NM_001160111.1(NOS3);NM_002133.2(HMOX1);XM_006716002.2(NOS3);
GO:1901206	positive regulation of adrenergic receptor signaling pathway involved in heart process	biological_process	5	35266	5	98659	0	0	2.79757	NM_000620.4(NOS1);NM_001204213.1(NOS1);NM_001204214.1(NOS1);NM_001204218.1(NOS1);XM_011538398.1(NOS1);
GO:1990425	ryanodine receptor complex	cellular_component	5	35266	5	98659	0	0	2.79757	NM_000620.4(NOS1);NM_001204213.1(NOS1);NM_001204214.1(NOS1);NM_001204218.1(NOS1);XM_011538398.1(NOS1);
GO:1902239	negative regulation of intrinsic apoptotic signaling pathway in response to osmotic stress by p53 class mediator	biological_process	1	35266	1	98659	0	0	2.79757	NM_000623.3(BDKRB2);
GO:0001315	age-dependent response to reactive oxygen species	biological_process	3	35266	3	98659	0	0	2.79757	NM_000636.2(SOD2);NM_001024465.1(SOD2);NM_001024466.1(SOD2);
GO:0003069	vasodilation by acetylcholine involved in regulation of systemic arterial blood pressure	biological_process	3	35266	3	98659	0	0	2.79757	NM_000636.2(SOD2);NM_001024465.1(SOD2);NM_001024466.1(SOD2);
GO:0071878	negative regulation of adrenergic receptor signaling pathway	biological_process	1	35266	1	98659	0	0	2.79757	NM_000681.3(ADRA2A);
GO:0071881	adenylate cyclase-inhibiting adrenergic receptor signaling pathway	biological_process	1	35266	1	98659	0	0	2.79757	NM_000681.3(ADRA2A);
GO:0071882	phospholipase C-activating adrenergic receptor signaling pathway	biological_process	1	35266	1	98659	0	0	2.79757	NM_000681.3(ADRA2A);
GO:0019510	S-adenosylhomocysteine catabolic process	biological_process	9	35266	9	98659	0	0	2.79757	NM_000687.2(AHCY);NM_001161766.1(AHCY);XM_005260316.3(AHCY);XM_005260317.1(AHCY);XM_011528656.1(AHCY);XM_011528657.1(AHCY);XM_011528658.1(AHCY);XM_011528659.1(AHCY);XM_011528660.1(AHCY);
GO:0030554	adenyl nucleotide binding	molecular_function	9	35266	9	98659	0	0	2.79757	NM_000687.2(AHCY);NM_001161766.1(AHCY);XM_005260316.3(AHCY);XM_005260317.1(AHCY);XM_011528656.1(AHCY);XM_011528657.1(AHCY);XM_011528658.1(AHCY);XM_011528659.1(AHCY);XM_011528660.1(AHCY);
GO:0071268	homocysteine biosynthetic process	biological_process	9	35266	9	98659	0	0	2.79757	NM_000687.2(AHCY);NM_001161766.1(AHCY);XM_005260316.3(AHCY);XM_005260317.1(AHCY);XM_011528656.1(AHCY);XM_011528657.1(AHCY);XM_011528658.1(AHCY);XM_011528659.1(AHCY);XM_011528660.1(AHCY);
GO:0016165	linoleate 13S-lipoxygenase activity	molecular_function	5	35266	5	98659	0	0	2.79757	NM_000697.2(ALOX12);NM_001039130.1(ALOX15B);NM_001039131.1(ALOX15B);NM_001141.2(ALOX15B);XM_011523780.1(ALOX12);
GO:0051121	hepoxilin metabolic process	biological_process	2	35266	2	98659	0	0	2.79757	NM_000697.2(ALOX12);XM_011523780.1(ALOX12);
GO:1901751	leukotriene A4 metabolic process	biological_process	2	35266	2	98659	0	0	2.79757	NM_000697.2(ALOX12);XM_011523780.1(ALOX12);
GO:2001306	lipoxin B4 biosynthetic process	biological_process	2	35266	2	98659	0	0	2.79757	NM_000697.2(ALOX12);XM_011523780.1(ALOX12);
GO:0002540	leukotriene production involved in inflammatory response	biological_process	5	35266	5	98659	0	0	2.79757	NM_000698.3(ALOX5);NM_001256153.1(ALOX5);NM_001256154.1(ALOX5);XM_011539564.1(ALOX5);XM_011546981.1(ALOX5);
GO:0004051	arachidonate 5-lipoxygenase activity	molecular_function	5	35266	5	98659	0	0	2.79757	NM_000698.3(ALOX5);NM_001256153.1(ALOX5);NM_001256154.1(ALOX5);XM_011539564.1(ALOX5);XM_011546981.1(ALOX5);
GO:1903280	negative regulation of calcium:sodium antiporter activity	biological_process	1	35266	1	98659	0	0	2.79757	NM_000702.3(ATP1A2);
GO:0035585	calcium-mediated signaling using extracellular calcium source	biological_process	56	35266	56	98659	0	0	2.79757	NM_000719.6(CACNA1C);NM_001114135.3(DMTN);NM_001114136.2(DMTN);NM_001114137.2(DMTN);NM_001114138.2(DMTN);NM_001114139.2(DMTN);NM_001129827.1(CACNA1C);NM_001129829.1(CACNA1C);NM_001129830.2(CACNA1C);NM_001129831.1(CACNA1C);NM_001129832.1(CACNA1C);NM_001129833.1(CACNA1C);NM_001129834.1(CACNA1C);NM_001129835.1(CACNA1C);NM_001129836.1(CACNA1C);NM_001129837.1(CACNA1C);NM_001129838.1(CACNA1C);NM_001129…
GO:0098912	membrane depolarization during atrial cardiac muscle cell action potential	biological_process	45	35266	45	98659	0	0	2.79757	NM_000719.6(CACNA1C);NM_000724.3(CACNB2);NM_001129827.1(CACNA1C);NM_001129829.1(CACNA1C);NM_001129830.2(CACNA1C);NM_001129831.1(CACNA1C);NM_001129832.1(CACNA1C);NM_001129833.1(CACNA1C);NM_001129834.1(CACNA1C);NM_001129835.1(CACNA1C);NM_001129836.1(CACNA1C);NM_001129837.1(CACNA1C);NM_001129838.1(CACNA1C);NM_001129839.1(CACNA1C);NM_001129840.1(CACNA1C);NM_001129841.1(CACNA1C);NM_001129842.1(CACNA1C…
GO:1904879	positive regulation of calcium ion transmembrane transport via high voltage-gated calcium channel	biological_process	14	35266	14	98659	0	0	2.79757	NM_000724.3(CACNB2);NM_001167945.1(CACNB2);NM_201570.2(CACNB2);NM_201571.3(CACNB2);NM_201572.3(CACNB2);NM_201590.2(CACNB2);NM_201593.2(CACNB2);NM_201596.2(CACNB2);NM_201597.2(CACNB2);XM_005252588.2(CACNB2);XM_005252591.2(CACNB2);XM_006717502.2(CACNB2);XM_011519659.1(CACNB2);XM_011519660.1(CACNB2);
GO:0016036	cellular response to phosphate starvation	biological_process	11	35266	11	98659	0	0	2.79757	NM_000754.3(COMT);NM_001135161.1(COMT);NM_001135162.1(COMT);NM_007310.2(COMT);XM_011529885.1(COMT);XM_011529886.1(COMT);XM_011529887.1(COMT);XM_011529888.1(COMT);XM_011529889.1(COMT);XM_011529890.1(COMT);XM_011529891.1(COMT);
GO:0050668	positive regulation of homocysteine metabolic process	biological_process	11	35266	11	98659	0	0	2.79757	NM_000754.3(COMT);NM_001135161.1(COMT);NM_001135162.1(COMT);NM_007310.2(COMT);XM_011529885.1(COMT);XM_011529886.1(COMT);XM_011529887.1(COMT);XM_011529888.1(COMT);XM_011529889.1(COMT);XM_011529890.1(COMT);XM_011529891.1(COMT);
GO:0009403	toxin biosynthetic process	biological_process	1	35266	1	98659	0	0	2.79757	NM_000761.4(CYP1A2);
GO:0071615	oxidative deethylation	biological_process	1	35266	1	98659	0	0	2.79757	NM_000761.4(CYP1A2);
GO:0018675	(S)-limonene 6-monooxygenase activity	molecular_function	2	35266	2	98659	0	0	2.79757	NM_000769.2(CYP2C19);NM_000771.3(CYP2C9);
GO:0018676	(S)-limonene 7-monooxygenase activity	molecular_function	2	35266	2	98659	0	0	2.79757	NM_000769.2(CYP2C19);NM_000771.3(CYP2C9);
GO:0052741	(R)-limonene 6-monooxygenase activity	molecular_function	2	35266	2	98659	0	0	2.79757	NM_000769.2(CYP2C19);NM_000771.3(CYP2C9);
GO:0019627	urea metabolic process	biological_process	1	35266	1	98659	0	0	2.79757	NM_000771.3(CYP2C9);
GO:0043603	cellular amide metabolic process	biological_process	1	35266	1	98659	0	0	2.79757	NM_000771.3(CYP2C9);
GO:0018910	benzene metabolic process	biological_process	1	35266	1	98659	0	0	2.79757	NM_000773.3(CYP2E1);
GO:0042197	halogenated hydrocarbon metabolic process	biological_process	1	35266	1	98659	0	0	2.79757	NM_000773.3(CYP2E1);
GO:0008386	cholesterol monooxygenase (side-chain-cleaving) activity	molecular_function	2	35266	2	98659	0	0	2.79757	NM_000781.2(CYP11A1);NM_001099773.1(CYP11A1);
GO:0034650	cortisol metabolic process	biological_process	2	35266	2	98659	0	0	2.79757	NM_000781.2(CYP11A1);NM_001099773.1(CYP11A1);
GO:0008403	25-hydroxycholecalciferol-24-hydroxylase activity	molecular_function	3	35266	3	98659	0	0	2.79757	NM_000782.4(CYP24A1);NM_001128915.1(CYP24A1);XM_005260304.3(CYP24A1);
GO:0030342	1-alpha,25-dihydroxyvitamin D3 24-hydroxylase activity	molecular_function	3	35266	3	98659	0	0	2.79757	NM_000782.4(CYP24A1);NM_001128915.1(CYP24A1);XM_005260304.3(CYP24A1);
GO:0004498	calcidiol 1-monooxygenase activity	molecular_function	1	35266	1	98659	0	0	2.79757	NM_000785.3(CYP27B1);
GO:0060177	regulation of angiotensin metabolic process	biological_process	7	35266	7	98659	0	0	2.79757	NM_000789.3(ACE);NM_001178057.1(ACE);NM_001429.3(EP300);NM_152830.2(ACE);XM_005257110.1(ACE);XM_006721737.2(ACE);XM_006724165.2(EP300);
GO:0071838	cell proliferation in bone marrow	biological_process	5	35266	5	98659	0	0	2.79757	NM_000789.3(ACE);NM_001178057.1(ACE);NM_152830.2(ACE);XM_005257110.1(ACE);XM_006721737.2(ACE);
GO:1900086	positive regulation of peptidyl-tyrosine autophosphorylation	biological_process	30	35266	30	98659	0	0	2.79757	NM_000789.3(ACE);NM_001025366.2(VEGFA);NM_001025367.2(VEGFA);NM_001025368.2(VEGFA);NM_001025369.2(VEGFA);NM_001025370.2(VEGFA);NM_001033756.2(VEGFA);NM_001171622.1(VEGFA);NM_001171623.1(VEGFA);NM_001171624.1(VEGFA);NM_001171625.1(VEGFA);NM_001171626.1(VEGFA);NM_001171627.1(VEGFA);NM_001171628.1(VEGFA);NM_001171629.1(VEGFA);NM_001171630.1(VEGFA);NM_001178057.1(ACE);NM_001191322.1(GREM1);NM_0011913…
GO:1903597	negative regulation of gap junction assembly	biological_process	5	35266	5	98659	0	0	2.79757	NM_000789.3(ACE);NM_001178057.1(ACE);NM_152830.2(ACE);XM_005257110.1(ACE);XM_006721737.2(ACE);
GO:0060160	negative regulation of dopamine receptor signaling pathway	biological_process	15	35266	15	98659	0	0	2.79757	NM_000795.3(DRD2);NM_000796.5(DRD3);NM_001040134.1(PALM);NM_001282563.2(DRD3);NM_001290809.1(DRD3);NM_002579.2(PALM);NM_016574.3(DRD2);NM_033663.5(DRD3);XM_005259565.3(PALM);XM_005259566.3(PALM);XM_011512510.1(DRD3);XM_011512511.1(DRD3);XM_011512512.1(DRD3);XM_011528043.1(PALM);XM_011528044.1(PALM);
GO:0090325	regulation of locomotion involved in locomotory behavior	biological_process	9	35266	9	98659	0	0	2.79757	NM_000795.3(DRD2);NM_000796.5(DRD3);NM_001282563.2(DRD3);NM_001290809.1(DRD3);NM_016574.3(DRD2);NM_033663.5(DRD3);XM_011512510.1(DRD3);XM_011512511.1(DRD3);XM_011512512.1(DRD3);
GO:1900168	positive regulation of glial cell-derived neurotrophic factor secretion	biological_process	5	35266	5	98659	0	0	2.79757	NM_000795.3(DRD2);NM_001025109.1(CD34);NM_001773.2(CD34);NM_016574.3(DRD2);XM_011510170.1(CD34);
GO:0032416	negative regulation of sodium:proton antiporter activity	biological_process	8	35266	8	98659	0	0	2.79757	NM_000796.5(DRD3);NM_001282563.2(DRD3);NM_001290809.1(DRD3);NM_004252.4(SLC9A3R1);NM_033663.5(DRD3);XM_011512510.1(DRD3);XM_011512511.1(DRD3);XM_011512512.1(DRD3);
GO:0045924	regulation of female receptivity	biological_process	1	35266	1	98659	0	0	2.79757	NM_000798.4(DRD5);
GO:0050758	regulation of thymidylate synthase biosynthetic process	biological_process	9	35266	9	98659	0	0	2.79757	NM_000803.4(FOLR2);NM_001113534.1(FOLR2);NM_001113535.1(FOLR2);NM_001113536.1(FOLR2);XM_005273856.2(FOLR2);XM_011544869.1(FOLR2);XM_011544870.1(FOLR2);XM_011544871.1(FOLR2);XM_011544872.1(FOLR2);
GO:0050711	negative regulation of interleukin-1 secretion	biological_process	10	35266	10	98659	0	0	2.79757	NM_000820.3(GAS6);NM_001277126.1(NLRP12);NM_001277129.1(NLRP12);NM_144687.3(NLRP12);XM_011527478.1(NLRP12);XM_011527479.1(NLRP12);XM_011527480.1(NLRP12);XM_011527481.1(NLRP12);XM_011527482.1(NLRP12);XM_011527483.1(NLRP12);
GO:1900142	negative regulation of oligodendrocyte apoptotic process	biological_process	1	35266	1	98659	0	0	2.79757	NM_000820.3(GAS6);
GO:2000533	negative regulation of renal albumin absorption	biological_process	1	35266	1	98659	0	0	2.79757	NM_000820.3(GAS6);
GO:0035730	S-nitrosoglutathione binding	molecular_function	1	35266	1	98659	0	0	2.79757	NM_000852.3(GSTP1);
GO:0035731	dinitrosyl-iron complex binding	molecular_function	1	35266	1	98659	0	0	2.79757	NM_000852.3(GSTP1);
GO:0035732	nitric oxide storage	biological_process	1	35266	1	98659	0	0	2.79757	NM_000852.3(GSTP1);
GO:0097057	TRAF2-GSTP1 complex	cellular_component	9	35266	9	98659	0	0	2.79757	NM_000852.3(GSTP1);NM_021138.3(TRAF2);XM_005266099.3(TRAF2);XM_011518973.1(TRAF2);XM_011518974.1(TRAF2);XM_011518975.1(TRAF2);XM_011518976.1(TRAF2);XM_011518977.1(TRAF2);XM_011518978.1(TRAF2);
GO:0051389	inactivation of MAPKK activity	biological_process	7	35266	7	98659	0	0	2.79757	NM_000875.4(IGF1R);NM_001291858.1(IGF1R);XM_011521513.1(IGF1R);XM_011521514.1(IGF1R);XM_011521515.1(IGF1R);XM_011521516.1(IGF1R);XM_011521517.1(IGF1R);
GO:0098657	import into cell	biological_process	1	35266	1	98659	0	0	2.79757	NM_000885.4(ITGA4);
GO:1990771	clathrin-mediated extracellular exosome endocytosis	biological_process	1	35266	1	98659	0	0	2.79757	NM_000885.4(ITGA4);
GO:0004463	leukotriene-A4 hydrolase activity	molecular_function	6	35266	6	98659	0	0	2.79757	NM_000895.2(LTA4H);NM_001256643.1(LTA4H);NM_001256644.1(LTA4H);XM_005268871.1(LTA4H);XM_011538348.1(LTA4H);XM_011538349.1(LTA4H);
GO:0038046	enkephalin receptor activity	molecular_function	1	35266	1	98659	0	0	2.79757	NM_000911.3(OPRD1);
GO:0001626	nociceptin receptor activity	molecular_function	6	35266	6	98659	0	0	2.79757	NM_000913.4(OPRL1);NM_001200019.1(OPRL1);NM_182647.2(OPRL1);XM_011528828.1(OPRL1);XM_011528829.1(OPRL1);XM_011528830.1(OPRL1);
GO:0060454	positive regulation of gastric acid secretion	biological_process	6	35266	6	98659	0	0	2.79757	NM_000913.4(OPRL1);NM_001200019.1(OPRL1);NM_182647.2(OPRL1);XM_011528828.1(OPRL1);XM_011528829.1(OPRL1);XM_011528830.1(OPRL1);
GO:1904059	regulation of locomotor rhythm	biological_process	9	35266	9	98659	0	0	2.79757	NM_000913.4(OPRL1);NM_001164766.1(ZFHX3);NM_001200019.1(OPRL1);NM_006885.3(ZFHX3);NM_182647.2(OPRL1);XM_005255957.2(ZFHX3);XM_011528828.1(OPRL1);XM_011528829.1(OPRL1);XM_011528830.1(OPRL1);
GO:0004119	cGMP-inhibited cyclic-nucleotide phosphodiesterase activity	molecular_function	6	35266	6	98659	0	0	2.79757	NM_000921.4(PDE3A);NM_000922.3(PDE3B);NM_001244683.1(PDE3A);XM_006718249.2(PDE3B);XM_006719086.2(PDE3A);XM_011520183.1(PDE3B);
GO:0033059	cellular pigmentation	biological_process	3	35266	3	98659	0	0	2.79757	NM_000939.2(POMC);NM_001035256.1(POMC);XM_011532917.1(POMC);
GO:2000852	regulation of corticosterone secretion	biological_process	9	35266	9	98659	0	0	2.79757	NM_000939.2(POMC);NM_001035256.1(POMC);NM_001145146.1(CRHR1);NM_001145147.1(CRHR1);NM_001145148.1(CRHR1);NM_001303018.1(CRHR1);NM_001303020.1(CRHR1);NM_004382.4(CRHR1);XM_011532917.1(POMC);
GO:0043315	positive regulation of neutrophil degranulation	biological_process	4	35266	4	98659	0	0	2.79757	NM_000952.4(PTAFR);NM_001164721.1(PTAFR);NM_001164722.2(PTAFR);NM_001164723.2(PTAFR);
GO:0071258	cellular response to gravity	biological_process	4	35266	4	98659	0	0	2.79757	NM_000952.4(PTAFR);NM_001164721.1(PTAFR);NM_001164722.2(PTAFR);NM_001164723.2(PTAFR);
GO:1904300	positive regulation of transcytosis	biological_process	4	35266	4	98659	0	0	2.79757	NM_000952.4(PTAFR);NM_001164721.1(PTAFR);NM_001164722.2(PTAFR);NM_001164723.2(PTAFR);
GO:1904303	positive regulation of maternal process involved in parturition	biological_process	4	35266	4	98659	0	0	2.79757	NM_000952.4(PTAFR);NM_001164721.1(PTAFR);NM_001164722.2(PTAFR);NM_001164723.2(PTAFR);
GO:1904306	positive regulation of gastro-intestinal system smooth muscle contraction	biological_process	4	35266	4	98659	0	0	2.79757	NM_000952.4(PTAFR);NM_001164721.1(PTAFR);NM_001164722.2(PTAFR);NM_001164723.2(PTAFR);
GO:1904317	cellular response to 2-O-acetyl-1-O-hexadecyl-sn-glycero-3-phosphocholine	biological_process	4	35266	4	98659	0	0	2.79757	NM_000952.4(PTAFR);NM_001164721.1(PTAFR);NM_001164722.2(PTAFR);NM_001164723.2(PTAFR);
GO:0001785	prostaglandin J receptor activity	molecular_function	4	35266	4	98659	0	0	2.79757	NM_000953.2(PTGDR);NM_001281469.1(PTGDR);NM_004778.2(PTGDR2);XM_005267891.2(PTGDR);
GO:0004956	prostaglandin D receptor activity	molecular_function	4	35266	4	98659	0	0	2.79757	NM_000953.2(PTGDR);NM_001281469.1(PTGDR);NM_004778.2(PTGDR2);XM_005267891.2(PTGDR);
GO:0008116	prostaglandin-I synthase activity	molecular_function	1	35266	1	98659	0	0	2.79757	NM_000961.3(PTGIS);
GO:0044323	retinoic acid-responsive element binding	molecular_function	20	35266	20	98659	0	0	2.79757	NM_000964.3(RARA);NM_001024809.3(RARA);NM_001145301.2(RARA);NM_001145302.2(RARA);NM_001291920.1(RXRA);NM_001291921.1(RXRA);NM_002957.5(RXRA);NM_014717.1(ZNF536);XM_005257552.3(RARA);XM_005257553.1(RARA);XM_005257554.1(RARA);XM_011525095.1(RARA);XM_011525096.1(RARA);XM_011527554.1(ZNF536);XM_011527555.1(ZNF536);XM_011527556.1(ZNF536);XM_011527557.1(ZNF536);XM_011527558.1(ZNF536);XM_011527559.1(ZNF…
GO:0060010	Sertoli cell fate commitment	biological_process	9	35266	9	98659	0	0	2.79757	NM_000964.3(RARA);NM_001024809.3(RARA);NM_001145301.2(RARA);NM_001145302.2(RARA);XM_005257552.3(RARA);XM_005257553.1(RARA);XM_005257554.1(RARA);XM_011525095.1(RARA);XM_011525096.1(RARA);
GO:0045299	otolith mineralization	biological_process	13	35266	13	98659	0	0	2.79757	NM_001001331.2(ATP2B2);NM_001683.3(ATP2B2);XM_005265179.3(ATP2B2);XM_006713175.2(ATP2B2);XM_011533751.1(ATP2B2);XM_011533752.1(ATP2B2);XM_011533753.1(ATP2B2);XM_011533754.1(ATP2B2);XM_011533755.1(ATP2B2);XM_011533756.1(ATP2B2);XM_011533757.1(ATP2B2);XM_011533758.1(ATP2B2);XM_011533759.1(ATP2B2);
GO:0045261	proton-transporting ATP synthase complex, catalytic core F(1)	cellular_component	6	35266	6	98659	0	0	2.79757	NM_001001935.2(ATP5A1);NM_001001937.1(ATP5A1);NM_001257334.1(ATP5A1);NM_001257335.1(ATP5A1);NM_004046.5(ATP5A1);XM_011526018.1(ATP5A1);
GO:0001071	nucleic acid binding transcription factor activity	molecular_function	5	35266	5	98659	0	0	2.79757	NM_001002295.1(GATA3);NM_002051.2(GATA3);NM_003107.2(SOX4);XM_005252442.2(GATA3);XM_005252443.3(GATA3);
GO:0001806	type IV hypersensitivity	biological_process	4	35266	4	98659	0	0	2.79757	NM_001002295.1(GATA3);NM_002051.2(GATA3);XM_005252442.2(GATA3);XM_005252443.3(GATA3);
GO:0002572	pro-T cell differentiation	biological_process	4	35266	4	98659	0	0	2.79757	NM_001002295.1(GATA3);NM_002051.2(GATA3);XM_005252442.2(GATA3);XM_005252443.3(GATA3);
GO:0035898	parathyroid hormone secretion	biological_process	4	35266	4	98659	0	0	2.79757	NM_001002295.1(GATA3);NM_002051.2(GATA3);XM_005252442.2(GATA3);XM_005252443.3(GATA3);
GO:0043370	regulation of CD4-positive, alpha-beta T cell differentiation	biological_process	4	35266	4	98659	0	0	2.79757	NM_001002295.1(GATA3);NM_002051.2(GATA3);XM_005252442.2(GATA3);XM_005252443.3(GATA3);
GO:0061085	regulation of histone H3-K27 methylation	biological_process	4	35266	4	98659	0	0	2.79757	NM_001002295.1(GATA3);NM_002051.2(GATA3);XM_005252442.2(GATA3);XM_005252443.3(GATA3);
GO:2000607	negative regulation of cell proliferation involved in mesonephros development	biological_process	4	35266	4	98659	0	0	2.79757	NM_001002295.1(GATA3);NM_002051.2(GATA3);XM_005252442.2(GATA3);XM_005252443.3(GATA3);
GO:2000683	regulation of cellular response to X-ray	biological_process	4	35266	4	98659	0	0	2.79757	NM_001002295.1(GATA3);NM_002051.2(GATA3);XM_005252442.2(GATA3);XM_005252443.3(GATA3);
GO:2000703	negative regulation of fibroblast growth factor receptor signaling pathway involved in ureteric bud formation	biological_process	4	35266	4	98659	0	0	2.79757	NM_001002295.1(GATA3);NM_002051.2(GATA3);XM_005252442.2(GATA3);XM_005252443.3(GATA3);
GO:2000734	negative regulation of glial cell-derived neurotrophic factor receptor signaling pathway involved in ureteric bud formation	biological_process	4	35266	4	98659	0	0	2.79757	NM_001002295.1(GATA3);NM_002051.2(GATA3);XM_005252442.2(GATA3);XM_005252443.3(GATA3);
GO:1900224	positive regulation of nodal signaling pathway involved in determination of lateral mesoderm left/right asymmetry	biological_process	10	35266	10	98659	0	0	2.79757	NM_001003652.3(SMAD2);NM_001135937.2(SMAD2);NM_005901.5(SMAD2);NM_018055.4(NODAL);XM_005258259.2(SMAD2);XM_006722451.2(SMAD2);XM_011525983.1(SMAD2);XM_011525984.1(SMAD2);XM_011525985.1(SMAD2);XM_011525986.1(SMAD2);
GO:1903691	positive regulation of wound healing, spreading of epidermal cells	biological_process	12	35266	12	98659	0	0	2.79757	NM_001003698.3(RREB1);NM_001003699.3(RREB1);NM_001003700.1(RREB1);NM_001168344.1(RREB1);XM_005249275.2(RREB1);XM_006715157.2(RREB1);XM_006715158.2(RREB1);XM_011514791.1(RREB1);XM_011514792.1(RREB1);XM_011514793.1(RREB1);XM_011514794.1(RREB1);XM_011514795.1(RREB1);
GO:0000822	inositol hexakisphosphate binding	molecular_function	11	35266	11	98659	0	0	2.79757	NM_001003722.1(GLE1);NM_001499.2(GLE1);NM_002224.3(ITPR3);XM_006717059.2(GLE1);XM_006717060.2(GLE1);XM_011514576.1(ITPR3);XM_011514577.1(ITPR3);XM_011518549.1(GLE1);XM_011518550.1(GLE1);XM_011518551.1(GLE1);XM_011518552.1(GLE1);
GO:2000124	regulation of endocannabinoid signaling pathway	biological_process	14	35266	14	98659	0	0	2.79757	NM_001003794.2(MGLL);NM_001256585.1(MGLL);NM_007283.6(MGLL);NM_020676.5(ABHD6);XM_005265334.2(ABHD6);XM_005265335.2(ABHD6);XM_005265336.2(ABHD6);XM_011512377.1(MGLL);XM_011512378.1(MGLL);XM_011512379.1(MGLL);XM_011512380.1(MGLL);XM_011512381.1(MGLL);XM_011512382.1(MGLL);XM_011512383.1(MGLL);
GO:1901611	phosphatidylglycerol binding	molecular_function	2	35266	2	98659	0	0	2.79757	NM_001003954.1(ANXA13);NM_004306.2(ANXA13);
GO:0098742	cell-cell adhesion via plasma-membrane adhesion molecules	biological_process	5	35266	5	98659	0	0	2.79757	NM_001004356.2(FGFRL1);NM_001004358.1(FGFRL1);NM_021923.3(FGFRL1);XM_011513486.1(FGFRL1);XM_011513487.1(FGFRL1);
GO:1903408	positive regulation of sodium:potassium-exchanging ATPase activity	biological_process	5	35266	5	98659	0	0	2.79757	NM_001005360.2(DNM2);NM_001005361.2(DNM2);NM_001005362.2(DNM2);NM_001190716.1(DNM2);NM_004945.3(DNM2);
GO:0004875	complement receptor activity	molecular_function	3	35266	3	98659	0	0	2.79757	NM_001006658.2(CR2);NM_001877.4(CR2);XM_011509206.1(CR2);
GO:0055002	striated muscle cell development	biological_process	5	35266	5	98659	0	0	2.79757	NM_001006946.1(SDC1);NM_002997.4(SDC1);XM_005262620.3(SDC1);XM_005262621.2(SDC1);XM_005262622.2(SDC1);
GO:0039692	single stranded viral RNA replication via double stranded DNA intermediate	biological_process	12	35266	12	98659	0	0	2.79757	NM_001007468.1(SMARCB1);NM_001111020.2(SUPT5H);NM_001130824.1(SUPT5H);NM_001130825.1(SUPT5H);NM_003073.3(SMARCB1);NM_003169.3(SUPT5H);XM_005259183.1(SUPT5H);XM_006723337.1(SUPT5H);XM_011530345.1(SMARCB1);XM_011530346.1(SMARCB1);XM_011546908.1(SMARCB1);XM_011546909.1(SMARCB1);
GO:2000618	regulation of histone H4-K16 acetylation	biological_process	6	35266	6	98659	0	0	2.79757	NM_001007468.1(SMARCB1);NM_003073.3(SMARCB1);XM_011530345.1(SMARCB1);XM_011530346.1(SMARCB1);XM_011546908.1(SMARCB1);XM_011546909.1(SMARCB1);
GO:1901185	negative regulation of ERBB signaling pathway	biological_process	5	35266	5	98659	0	0	2.79757	NM_001008530.2(LGMN);NM_005606.6(LGMN);XM_005267862.3(LGMN);XM_005267863.3(LGMN);XM_011536970.1(LGMN);
GO:0000390	spliceosomal complex disassembly	biological_process	3	35266	3	98659	0	0	2.79757	NM_001008697.1(TFIP11);NM_012143.2(TFIP11);XM_011530079.1(TFIP11);
GO:1904876	negative regulation of DNA ligase activity	biological_process	3	35266	3	98659	0	0	2.79757	NM_001008697.1(TFIP11);NM_012143.2(TFIP11);XM_011530079.1(TFIP11);
GO:0044053	translocation of peptides or proteins into host cell cytoplasm	biological_process	2	35266	2	98659	0	0	2.79757	NM_001008897.1(TCP1);NM_030752.2(TCP1);
GO:2000109	regulation of macrophage apoptotic process	biological_process	2	35266	2	98659	0	0	2.79757	NM_001008897.1(TCP1);NM_030752.2(TCP1);
GO:0042988	X11-like protein binding	molecular_function	3	35266	3	98659	0	0	2.79757	NM_001009566.2(CLSTN1);NM_001302883.1(CLSTN1);NM_014944.4(CLSTN1);
GO:0021501	prechordal plate formation	biological_process	10	35266	10	98659	0	0	2.79757	NM_001009955.3(SSBP3);NM_018070.4(SSBP3);NM_145716.3(SSBP3);XM_005270713.1(SSBP3);XM_006710545.2(SSBP3);XM_011541161.1(SSBP3);XM_011541162.1(SSBP3);XM_011541163.1(SSBP3);XM_011541164.1(SSBP3);XM_011541165.1(SSBP3);
GO:0021547	midbrain-hindbrain boundary initiation	biological_process	10	35266	10	98659	0	0	2.79757	NM_001009955.3(SSBP3);NM_018070.4(SSBP3);NM_145716.3(SSBP3);XM_005270713.1(SSBP3);XM_006710545.2(SSBP3);XM_011541161.1(SSBP3);XM_011541162.1(SSBP3);XM_011541163.1(SSBP3);XM_011541164.1(SSBP3);XM_011541165.1(SSBP3);
GO:2000744	positive regulation of anterior head development	biological_process	12	35266	12	98659	0	0	2.79757	NM_001009955.3(SSBP3);NM_005568.4(LHX1);NM_018070.4(SSBP3);NM_145716.3(SSBP3);XM_005270713.1(SSBP3);XM_006710545.2(SSBP3);XM_011541161.1(SSBP3);XM_011541162.1(SSBP3);XM_011541163.1(SSBP3);XM_011541164.1(SSBP3);XM_011541165.1(SSBP3);XM_011546810.1(LHX1);
GO:1903758	negative regulation of transcription from RNA polymerase II promoter by histone modification	biological_process	7	35266	7	98659	0	0	2.79757	NM_001012614.1(CTBP1);NM_001328.2(CTBP1);XM_005272261.2(CTBP1);XM_005272263.3(CTBP1);XM_011513395.1(CTBP1);XM_011513396.1(CTBP1);XM_011513397.1(CTBP1);
GO:0080048	GDP-D-glucose phosphorylase activity	molecular_function	2	35266	2	98659	0	0	2.79757	NM_001013657.2(GDPGP1);XM_011521550.1(GDPGP1);
GO:0061339	establishment or maintenance of monopolar cell polarity	biological_process	4	35266	4	98659	0	0	2.79757	NM_001013838.1(RLTPR);XM_005255807.2(RLTPR);XM_011522874.1(RLTPR);XM_011522875.1(RLTPR);
GO:1902745	positive regulation of lamellipodium organization	biological_process	13	35266	13	98659	0	0	2.79757	NM_001013838.1(RLTPR);NM_001173977.1(LRRC16A);NM_017640.5(LRRC16A);XM_005249218.1(LRRC16A);XM_005255807.2(RLTPR);XM_011514732.1(LRRC16A);XM_011514733.1(LRRC16A);XM_011514734.1(LRRC16A);XM_011514735.1(LRRC16A);XM_011514736.1(LRRC16A);XM_011514737.1(LRRC16A);XM_011522874.1(RLTPR);XM_011522875.1(RLTPR);
GO:0097631	integral component of omegasome membrane	cellular_component	2	35266	2	98659	0	0	2.79757	NM_001014764.2(EMC6);NM_031298.3(EMC6);
GO:1904530	negative regulation of actin filament binding	biological_process	4	35266	4	98659	0	0	2.79757	NM_001014809.2(CRMP1);NM_001288661.1(CRMP1);NM_001288662.1(CRMP1);NM_001313.4(CRMP1);
GO:0000254	C-4 methylsterol oxidase activity	molecular_function	3	35266	3	98659	0	0	2.79757	NM_001017369.2(MSMO1);NM_006745.4(MSMO1);XM_005263176.1(MSMO1);
GO:0022865	transmembrane electron transfer carrier	molecular_function	5	35266	5	98659	0	0	2.79757	NM_001017916.1(CYB561);NM_001017917.1(CYB561);NM_001915.3(CYB561);XM_005257091.1(CYB561);XM_011524424.1(CYB561);
GO:0043618	regulation of transcription from RNA polymerase II promoter in response to stress	biological_process	20	35266	20	98659	0	0	2.79757	NM_001018016.2(MUC1);NM_001018017.2(MUC1);NM_001044390.2(MUC1);NM_001044391.2(MUC1);NM_001044392.2(MUC1);NM_001044393.2(MUC1);NM_001204285.1(MUC1);NM_001204286.1(MUC1);NM_001204287.1(MUC1);NM_001204288.1(MUC1);NM_001204289.1(MUC1);NM_001204290.1(MUC1);NM_001204291.1(MUC1);NM_001204292.1(MUC1);NM_001204293.1(MUC1);NM_001204294.1(MUC1);NM_001204295.1(MUC1);NM_001204296.1(MUC1);NM_001204297.1(MUC1);…
GO:0004611	phosphoenolpyruvate carboxykinase activity	molecular_function	5	35266	5	98659	0	0	2.79757	NM_001018073.2(PCK2);NM_001291556.1(PCK2);NM_004563.3(PCK2);XM_006720158.2(PCK2);XM_011536813.1(PCK2);
GO:0072175	epithelial tube formation	biological_process	2	35266	2	98659	0	0	2.79757	NM_001018111.2(PODXL);NM_005397.3(PODXL);
GO:0000248	C-5 sterol desaturase activity	molecular_function	4	35266	4	98659	0	0	2.79757	NM_001024956.2(SC5D);NM_006918.4(SC5D);NM_013402.4(FADS1);XM_011545022.1(FADS1);
GO:0036053	glomerular endothelium fenestra	cellular_component	3	35266	3	98659	0	0	2.79757	NM_001025109.1(CD34);NM_001773.2(CD34);XM_011510170.1(CD34);
GO:0043199	sulfate binding	molecular_function	3	35266	3	98659	0	0	2.79757	NM_001025109.1(CD34);NM_001773.2(CD34);XM_011510170.1(CD34);
GO:0071657	positive regulation of granulocyte colony-stimulating factor production	biological_process	5	35266	5	98659	0	0	2.79757	NM_001025109.1(CD34);NM_001773.2(CD34);NM_002202.2(ISL1);XM_011510170.1(CD34);XM_011543380.1(ISL1);
GO:0071971	extracellular exosome assembly	biological_process	3	35266	3	98659	0	0	2.79757	NM_001025109.1(CD34);NM_001773.2(CD34);XM_011510170.1(CD34);
GO:0072254	metanephric glomerular mesangial cell differentiation	biological_process	3	35266	3	98659	0	0	2.79757	NM_001025109.1(CD34);NM_001773.2(CD34);XM_011510170.1(CD34);
GO:1900035	negative regulation of cellular response to heat	biological_process	3	35266	3	98659	0	0	2.79757	NM_001025109.1(CD34);NM_001773.2(CD34);XM_011510170.1(CD34);
GO:0045323	interleukin-1 receptor complex	cellular_component	9	35266	9	98659	0	0	2.79757	NM_001025242.1(IRAK1);NM_001025243.1(IRAK1);NM_001569.3(IRAK1);NM_003302.2(TRIP6);NM_019009.3(TOLLIP);XM_005274668.2(IRAK1);XM_011516545.1(TRIP6);XM_011520192.1(TOLLIP);XM_011531158.1(IRAK1);
GO:0002575	basophil chemotaxis	biological_process	19	35266	19	98659	0	0	2.79757	NM_001025366.2(VEGFA);NM_001025367.2(VEGFA);NM_001025368.2(VEGFA);NM_001025369.2(VEGFA);NM_001025370.2(VEGFA);NM_001033756.2(VEGFA);NM_001171622.1(VEGFA);NM_001171623.1(VEGFA);NM_001171624.1(VEGFA);NM_001171625.1(VEGFA);NM_001171626.1(VEGFA);NM_001171627.1(VEGFA);NM_001171628.1(VEGFA);NM_001171629.1(VEGFA);NM_001171630.1(VEGFA);NM_001204384.1(VEGFA);NM_001204385.1(VEGFA);NM_001287044.1(VEGFA);NM_…
GO:0003169	coronary vein morphogenesis	biological_process	21	35266	21	98659	0	0	2.79757	NM_001025366.2(VEGFA);NM_001025367.2(VEGFA);NM_001025368.2(VEGFA);NM_001025369.2(VEGFA);NM_001025370.2(VEGFA);NM_001033756.2(VEGFA);NM_001171622.1(VEGFA);NM_001171623.1(VEGFA);NM_001171624.1(VEGFA);NM_001171625.1(VEGFA);NM_001171626.1(VEGFA);NM_001171627.1(VEGFA);NM_001171628.1(VEGFA);NM_001171629.1(VEGFA);NM_001171630.1(VEGFA);NM_001204384.1(VEGFA);NM_001204385.1(VEGFA);NM_001287044.1(VEGFA);NM_…
GO:0038091	positive regulation of cell proliferation by VEGF-activated platelet derived growth factor receptor signaling pathway	biological_process	30	35266	30	98659	0	0	2.79757	NM_001025366.2(VEGFA);NM_001025367.2(VEGFA);NM_001025368.2(VEGFA);NM_001025369.2(VEGFA);NM_001025370.2(VEGFA);NM_001033756.2(VEGFA);NM_001171622.1(VEGFA);NM_001171623.1(VEGFA);NM_001171624.1(VEGFA);NM_001171625.1(VEGFA);NM_001171626.1(VEGFA);NM_001171627.1(VEGFA);NM_001171628.1(VEGFA);NM_001171629.1(VEGFA);NM_001171630.1(VEGFA);NM_001204384.1(VEGFA);NM_001204385.1(VEGFA);NM_001287044.1(VEGFA);NM_…
GO:0043183	vascular endothelial growth factor receptor 1 binding	molecular_function	21	35266	21	98659	0	0	2.79757	NM_001025366.2(VEGFA);NM_001025367.2(VEGFA);NM_001025368.2(VEGFA);NM_001025369.2(VEGFA);NM_001025370.2(VEGFA);NM_001033756.2(VEGFA);NM_001171622.1(VEGFA);NM_001171623.1(VEGFA);NM_001171624.1(VEGFA);NM_001171625.1(VEGFA);NM_001171626.1(VEGFA);NM_001171627.1(VEGFA);NM_001171628.1(VEGFA);NM_001171629.1(VEGFA);NM_001171630.1(VEGFA);NM_001204384.1(VEGFA);NM_001204385.1(VEGFA);NM_001243733.1(VEGFB);NM_…
GO:0060319	primitive erythrocyte differentiation	biological_process	27	35266	27	98659	0	0	2.79757	NM_001025366.2(VEGFA);NM_001025367.2(VEGFA);NM_001025368.2(VEGFA);NM_001025369.2(VEGFA);NM_001025370.2(VEGFA);NM_001033756.2(VEGFA);NM_001171622.1(VEGFA);NM_001171623.1(VEGFA);NM_001171624.1(VEGFA);NM_001171625.1(VEGFA);NM_001171626.1(VEGFA);NM_001171627.1(VEGFA);NM_001171628.1(VEGFA);NM_001171629.1(VEGFA);NM_001171630.1(VEGFA);NM_001204384.1(VEGFA);NM_001204385.1(VEGFA);NM_001287044.1(VEGFA);NM_…
GO:0060948	cardiac vascular smooth muscle cell development	biological_process	25	35266	25	98659	0	0	2.79757	NM_001025366.2(VEGFA);NM_001025367.2(VEGFA);NM_001025368.2(VEGFA);NM_001025369.2(VEGFA);NM_001025370.2(VEGFA);NM_001033756.2(VEGFA);NM_001171622.1(VEGFA);NM_001171623.1(VEGFA);NM_001171624.1(VEGFA);NM_001171625.1(VEGFA);NM_001171626.1(VEGFA);NM_001171627.1(VEGFA);NM_001171628.1(VEGFA);NM_001171629.1(VEGFA);NM_001171630.1(VEGFA);NM_001204384.1(VEGFA);NM_001204385.1(VEGFA);NM_001287044.1(VEGFA);NM_…
GO:1903572	positive regulation of protein kinase D signaling	biological_process	19	35266	19	98659	0	0	2.79757	NM_001025366.2(VEGFA);NM_001025367.2(VEGFA);NM_001025368.2(VEGFA);NM_001025369.2(VEGFA);NM_001025370.2(VEGFA);NM_001033756.2(VEGFA);NM_001171622.1(VEGFA);NM_001171623.1(VEGFA);NM_001171624.1(VEGFA);NM_001171625.1(VEGFA);NM_001171626.1(VEGFA);NM_001171627.1(VEGFA);NM_001171628.1(VEGFA);NM_001171629.1(VEGFA);NM_001171630.1(VEGFA);NM_001204384.1(VEGFA);NM_001204385.1(VEGFA);NM_001287044.1(VEGFA);NM_…
GO:1902387	ceramide 1-phosphate binding	molecular_function	4	35266	4	98659	0	0	2.79757	NM_001029885.1(CPTP);XM_005244801.2(CPTP);XM_005244802.1(CPTP);XM_011542200.1(CPTP);
GO:1902388	ceramide 1-phosphate transporter activity	molecular_function	4	35266	4	98659	0	0	2.79757	NM_001029885.1(CPTP);XM_005244801.2(CPTP);XM_005244802.1(CPTP);XM_011542200.1(CPTP);
GO:1902389	ceramide 1-phosphate transport	biological_process	4	35266	4	98659	0	0	2.79757	NM_001029885.1(CPTP);XM_005244801.2(CPTP);XM_005244802.1(CPTP);XM_011542200.1(CPTP);
GO:0061394	regulation of transcription from RNA polymerase II promoter in response to arsenic-containing substance	biological_process	8	35266	8	98659	0	0	2.79757	NM_001030287.3(ATF3);NM_001040619.2(ATF3);NM_001206484.2(ATF3);NM_001206486.2(ATF3);NM_001206488.2(ATF3);NM_001674.3(ATF3);XM_005273146.1(ATF3);XM_011509579.1(ATF3);
GO:0009124	nucleoside monophosphate biosynthetic process	biological_process	6	35266	6	98659	0	0	2.79757	NM_001033113.1(ENTPD8);NM_198585.2(ENTPD8);XM_011518665.1(ENTPD8);XM_011518666.1(ENTPD8);XM_011518667.1(ENTPD8);XM_011518668.1(ENTPD8);
GO:0009133	nucleoside diphosphate biosynthetic process	biological_process	6	35266	6	98659	0	0	2.79757	NM_001033113.1(ENTPD8);NM_198585.2(ENTPD8);XM_011518665.1(ENTPD8);XM_011518666.1(ENTPD8);XM_011518667.1(ENTPD8);XM_011518668.1(ENTPD8);
GO:1902410	mitotic cytokinetic process	biological_process	12	35266	12	98659	0	0	2.79757	NM_001037144.5(CNTROB);NM_053051.3(CNTROB);XM_005256437.1(CNTROB);XM_005256438.1(CNTROB);XM_005256439.1(CNTROB);XM_006721438.1(CNTROB);XM_006721439.1(CNTROB);XM_006721440.1(CNTROB);XM_011523634.1(CNTROB);XM_011523635.1(CNTROB);XM_011523636.1(CNTROB);XM_011523637.1(CNTROB);
GO:0016116	carotenoid metabolic process	biological_process	5	35266	5	98659	0	0	2.79757	NM_001037290.2(BCO2);NM_001256397.1(BCO2);NM_001256398.1(BCO2);NM_001256400.1(BCO2);NM_031938.5(BCO2);
GO:0016119	carotene metabolic process	biological_process	5	35266	5	98659	0	0	2.79757	NM_001037290.2(BCO2);NM_001256397.1(BCO2);NM_001256398.1(BCO2);NM_001256400.1(BCO2);NM_031938.5(BCO2);
GO:0016121	carotene catabolic process	biological_process	5	35266	5	98659	0	0	2.79757	NM_001037290.2(BCO2);NM_001256397.1(BCO2);NM_001256398.1(BCO2);NM_001256400.1(BCO2);NM_031938.5(BCO2);
GO:0016122	xanthophyll metabolic process	biological_process	5	35266	5	98659	0	0	2.79757	NM_001037290.2(BCO2);NM_001256397.1(BCO2);NM_001256398.1(BCO2);NM_001256400.1(BCO2);NM_031938.5(BCO2);
GO:0017071	intracellular cyclic nucleotide activated cation channel complex	cellular_component	3	35266	3	98659	0	0	2.79757	NM_001037329.3(CNGA4);XM_006718145.2(CNGA4);XM_011519899.1(CNGA4);
GO:0036403	arachidonate 8(S)-lipoxygenase activity	molecular_function	3	35266	3	98659	0	0	2.79757	NM_001039130.1(ALOX15B);NM_001039131.1(ALOX15B);NM_001141.2(ALOX15B);
GO:1903025	regulation of RNA polymerase II regulatory region sequence-specific DNA binding	biological_process	32	35266	32	98659	0	0	2.79757	NM_001039360.2(ZBTB7C);NM_001257135.1(LIF);NM_002309.4(LIF);NM_022455.4(NSD1);NM_172349.2(NSD1);XM_005258227.2(ZBTB7C);XM_005258229.3(ZBTB7C);XM_005265959.1(NSD1);XM_005265960.1(NSD1);XM_005265961.1(NSD1);XM_005265962.3(NSD1);XM_006724240.2(LIF);XM_011525861.1(ZBTB7C);XM_011525862.1(ZBTB7C);XM_011525863.1(ZBTB7C);XM_011525864.1(ZBTB7C);XM_011525865.1(ZBTB7C);XM_011525866.1(ZBTB7C);XM_011525867.1(…
GO:0039552	RIG-I binding	molecular_function	7	35266	7	98659	0	0	2.79757	NM_001039573.2(SEC14L1);NM_001143998.1(SEC14L1);NM_001143999.1(SEC14L1);NM_001144001.1(SEC14L1);NM_001204408.1(SEC14L1);NM_001204410.1(SEC14L1);NM_003003.3(SEC14L1);
GO:0098772	molecular function regulator	molecular_function	7	35266	7	98659	0	0	2.79757	NM_001039573.2(SEC14L1);NM_001143998.1(SEC14L1);NM_001143999.1(SEC14L1);NM_001144001.1(SEC14L1);NM_001204408.1(SEC14L1);NM_001204410.1(SEC14L1);NM_003003.3(SEC14L1);
GO:0032738	positive regulation of interleukin-15 production	biological_process	10	35266	10	98659	0	0	2.79757	NM_001039661.1(TIRAP);NM_148910.2(TIRAP);XM_005271399.2(TIRAP);XM_011542576.1(TIRAP);XM_011542577.1(TIRAP);XM_011542578.1(TIRAP);XM_011542579.1(TIRAP);XM_011542580.1(TIRAP);XM_011542581.1(TIRAP);XM_011542582.1(TIRAP);
GO:0035665	TIRAP-dependent toll-like receptor 4 signaling pathway	biological_process	10	35266	10	98659	0	0	2.79757	NM_001039661.1(TIRAP);NM_148910.2(TIRAP);XM_005271399.2(TIRAP);XM_011542576.1(TIRAP);XM_011542577.1(TIRAP);XM_011542578.1(TIRAP);XM_011542579.1(TIRAP);XM_011542580.1(TIRAP);XM_011542581.1(TIRAP);XM_011542582.1(TIRAP);
GO:0004320	oleoyl-[acyl-carrier-protein] hydrolase activity	molecular_function	5	35266	5	98659	0	0	2.79757	NM_001039702.2(OLAH);NM_004104.4(FASN);NM_018324.2(OLAH);XM_006717456.2(OLAH);XM_011523538.1(FASN);
GO:0016295	myristoyl-[acyl-carrier-protein] hydrolase activity	molecular_function	5	35266	5	98659	0	0	2.79757	NM_001039702.2(OLAH);NM_004104.4(FASN);NM_018324.2(OLAH);XM_006717456.2(OLAH);XM_011523538.1(FASN);
GO:0016296	palmitoyl-[acyl-carrier-protein] hydrolase activity	molecular_function	5	35266	5	98659	0	0	2.79757	NM_001039702.2(OLAH);NM_004104.4(FASN);NM_018324.2(OLAH);XM_006717456.2(OLAH);XM_011523538.1(FASN);
GO:0031309	integral component of nuclear outer membrane	cellular_component	5	35266	5	98659	0	0	2.79757	NM_001039876.1(SYNE4);NM_001297735.1(SYNE4);XM_005258598.2(SYNE4);XM_005258601.2(SYNE4);XM_005258604.3(SYNE4);
GO:1903087	mitotic spindle pole body duplication	biological_process	5	35266	5	98659	0	0	2.79757	NM_001039876.1(SYNE4);NM_001297735.1(SYNE4);XM_005258598.2(SYNE4);XM_005258601.2(SYNE4);XM_005258604.3(SYNE4);
GO:1990608	mitotic spindle pole body localization to nuclear envelope	biological_process	5	35266	5	98659	0	0	2.79757	NM_001039876.1(SYNE4);NM_001297735.1(SYNE4);XM_005258598.2(SYNE4);XM_005258601.2(SYNE4);XM_005258604.3(SYNE4);
GO:0002695	negative regulation of leukocyte activation	biological_process	3	35266	3	98659	0	0	2.79757	NM_001039966.1(GPER1);NM_001098201.1(GPER1);NM_001505.2(GPER1);
GO:0010948	negative regulation of cell cycle process	biological_process	3	35266	3	98659	0	0	2.79757	NM_001039966.1(GPER1);NM_001098201.1(GPER1);NM_001505.2(GPER1);
GO:0017082	mineralocorticoid receptor activity	molecular_function	3	35266	3	98659	0	0	2.79757	NM_001039966.1(GPER1);NM_001098201.1(GPER1);NM_001505.2(GPER1);
GO:0051053	negative regulation of DNA metabolic process	biological_process	5	35266	5	98659	0	0	2.79757	NM_001039966.1(GPER1);NM_001098201.1(GPER1);NM_001505.2(GPER1);NM_024409.2(NPPC);XM_011511245.1(NPPC);
GO:1903492	response to acetylsalicylate	biological_process	8	35266	8	98659	0	0	2.79757	NM_001039970.1(PTPN5);NM_001278236.1(PTPN5);NM_001278238.1(PTPN5);NM_001278239.1(PTPN5);NM_006906.1(PTPN5);NM_032781.3(PTPN5);XM_011520411.1(PTPN5);XM_011520412.1(PTPN5);
GO:2001025	positive regulation of response to drug	biological_process	8	35266	8	98659	0	0	2.79757	NM_001039970.1(PTPN5);NM_001278236.1(PTPN5);NM_001278238.1(PTPN5);NM_001278239.1(PTPN5);NM_006906.1(PTPN5);NM_032781.3(PTPN5);XM_011520411.1(PTPN5);XM_011520412.1(PTPN5);
GO:0008627	intrinsic apoptotic signaling pathway in response to osmotic stress	biological_process	9	35266	9	98659	0	0	2.79757	NM_001040142.1(SCN2A);NM_001040143.1(SCN2A);NM_021007.2(SCN2A);XM_005246750.2(SCN2A);XM_005246753.2(SCN2A);XM_005246754.3(SCN2A);XM_005246755.3(SCN2A);XM_011511608.1(SCN2A);XM_011511609.1(SCN2A);
GO:1904071	presynaptic active zone assembly	biological_process	4	35266	4	98659	0	0	2.79757	NM_001040429.2(PCDH17);XM_005266357.1(PCDH17);XM_005266358.1(PCDH17);XM_011535050.1(PCDH17);
GO:2000807	regulation of synaptic vesicle clustering	biological_process	4	35266	4	98659	0	0	2.79757	NM_001040429.2(PCDH17);XM_005266357.1(PCDH17);XM_005266358.1(PCDH17);XM_011535050.1(PCDH17);
GO:0015499	formate transmembrane transporter activity	molecular_function	6	35266	6	98659	0	0	2.79757	NM_001040454.1(SLC26A6);NM_001281732.1(SLC26A6);NM_001281733.1(SLC26A6);NM_022911.2(SLC26A6);NM_134263.2(SLC26A6);NM_134426.2(SLC26A6);
GO:0015659	formate uptake transmembrane transporter activity	molecular_function	6	35266	6	98659	0	0	2.79757	NM_001040454.1(SLC26A6);NM_001281732.1(SLC26A6);NM_001281733.1(SLC26A6);NM_022911.2(SLC26A6);NM_134263.2(SLC26A6);NM_134426.2(SLC26A6);
GO:0015660	formate efflux transmembrane transporter activity	molecular_function	6	35266	6	98659	0	0	2.79757	NM_001040454.1(SLC26A6);NM_001281732.1(SLC26A6);NM_001281733.1(SLC26A6);NM_022911.2(SLC26A6);NM_134263.2(SLC26A6);NM_134426.2(SLC26A6);
GO:0015724	formate transport	biological_process	6	35266	6	98659	0	0	2.79757	NM_001040454.1(SLC26A6);NM_001281732.1(SLC26A6);NM_001281733.1(SLC26A6);NM_022911.2(SLC26A6);NM_134263.2(SLC26A6);NM_134426.2(SLC26A6);
GO:0015797	mannitol transport	biological_process	6	35266	6	98659	0	0	2.79757	NM_001040454.1(SLC26A6);NM_001281732.1(SLC26A6);NM_001281733.1(SLC26A6);NM_022911.2(SLC26A6);NM_134263.2(SLC26A6);NM_134426.2(SLC26A6);
GO:0010021	amylopectin biosynthetic process	biological_process	1	35266	1	98659	0	0	2.79757	NM_001042.2(SLC2A4);
GO:0010729	positive regulation of hydrogen peroxide biosynthetic process	biological_process	4	35266	4	98659	0	0	2.79757	NM_001042428.1(ZNF205);NM_001278158.1(ZNF205);NM_003456.2(ZNF205);XM_005255558.1(ZNF205);
GO:0032970	regulation of actin filament-based process	biological_process	12	35266	12	98659	0	0	2.79757	NM_001042481.2(FRMD6);NM_001267046.1(FRMD6);NM_001267047.1(FRMD6);NM_001303499.1(CNN2);NM_001303501.1(CNN2);NM_004368.3(CNN2);NM_152330.3(FRMD6);NM_201277.2(CNN2);XM_006720029.1(FRMD6);XM_006720030.1(FRMD6);XM_011536423.1(FRMD6);XM_011536424.1(FRMD6);
GO:0008267	poly-glutamine tract binding	molecular_function	8	35266	8	98659	0	0	2.79757	NM_001042681.1(RERE);NM_001042682.1(RERE);NM_012102.3(RERE);XM_005263464.1(RERE);XM_005263466.1(RERE);XM_006710653.1(RERE);XM_011541510.1(RERE);XM_011541511.1(RERE);
GO:0005330	dopamine:sodium symporter activity	molecular_function	5	35266	5	98659	0	0	2.79757	NM_001043.3(SLC6A2);NM_001044.4(SLC6A3);NM_001172501.1(SLC6A2);NM_001172502.1(SLC6A2);NM_001172504.1(SLC6A2);
GO:0005334	norepinephrine:sodium symporter activity	molecular_function	4	35266	4	98659	0	0	2.79757	NM_001043.3(SLC6A2);NM_001172501.1(SLC6A2);NM_001172502.1(SLC6A2);NM_001172504.1(SLC6A2);
GO:0015874	norepinephrine transport	biological_process	6	35266	6	98659	0	0	2.79757	NM_001043.3(SLC6A2);NM_001172501.1(SLC6A2);NM_001172502.1(SLC6A2);NM_001172504.1(SLC6A2);NM_003057.2(SLC22A1);NM_153187.1(SLC22A1);
GO:0005329	dopamine transmembrane transporter activity	molecular_function	5	35266	5	98659	0	0	2.79757	NM_001044.4(SLC6A3);NM_003057.2(SLC22A1);NM_003058.3(SLC22A2);NM_021977.3(SLC22A3);NM_153187.1(SLC22A1);
GO:0004961	thromboxane A2 receptor activity	molecular_function	3	35266	3	98659	0	0	2.79757	NM_001060.5(TBXA2R);NM_201636.2(TBXA2R);XM_011528214.1(TBXA2R);
GO:0038193	thromboxane A2 signaling pathway	biological_process	3	35266	3	98659	0	0	2.79757	NM_001060.5(TBXA2R);NM_201636.2(TBXA2R);XM_011528214.1(TBXA2R);
GO:0015091	ferric iron transmembrane transporter activity	molecular_function	2	35266	2	98659	0	0	2.79757	NM_001063.3(TF);XM_011513100.1(TF);
GO:0097513	myosin II filament	cellular_component	20	35266	20	98659	0	0	2.79757	NM_001077186.1(MYH14);NM_001145809.1(MYH14);NM_001256012.1(MYH10);NM_001256095.1(MYH10);NM_002473.5(MYH9);NM_005964.3(MYH10);NM_024729.3(MYH14);XM_005256651.2(MYH10);XM_006723386.2(MYH14);XM_011523875.1(MYH10);XM_011523876.1(MYH10);XM_011523877.1(MYH10);XM_011523878.1(MYH10);XM_011523879.1(MYH10);XM_011523880.1(MYH10);XM_011527320.1(MYH14);XM_011527321.1(MYH14);XM_011527322.1(MYH14);XM_011527323.…
GO:0038182	G-protein coupled bile acid receptor activity	molecular_function	5	35266	5	98659	0	0	2.79757	NM_001077191.1(GPBAR1);NM_001077194.1(GPBAR1);NM_170699.2(GPBAR1);XM_011510743.1(GPBAR1);XM_011510744.1(GPBAR1);
GO:0038184	cell surface bile acid receptor signaling pathway	biological_process	5	35266	5	98659	0	0	2.79757	NM_001077191.1(GPBAR1);NM_001077194.1(GPBAR1);NM_170699.2(GPBAR1);XM_011510743.1(GPBAR1);XM_011510744.1(GPBAR1);
GO:0072365	regulation of cellular ketone metabolic process by negative regulation of transcription from RNA polymerase II promoter	biological_process	3	35266	3	98659	0	0	2.79757	NM_001077261.3(NCOR2);NM_001206654.1(NCOR2);NM_006312.5(NCOR2);
GO:0060491	regulation of cell projection assembly	biological_process	9	35266	9	98659	0	0	2.79757	NM_001077710.2(FAM110C);NM_005417.4(SRC);NM_006274.2(CCL19);NM_198291.2(SRC);XM_011510372.1(FAM110C);XM_011510373.1(FAM110C);XM_011510374.1(FAM110C);XM_011529013.1(SRC);XM_011529014.1(SRC);
GO:0032621	interleukin-18 production	biological_process	16	35266	16	98659	0	0	2.79757	NM_001079821.2(NLRP3);NM_001127461.2(NLRP3);NM_001127462.2(NLRP3);NM_001243133.1(NLRP3);NM_004895.4(NLRP3);NM_183395.2(NLRP3);XM_005273036.2(NLRP3);XM_005273037.2(NLRP3);XM_011544048.1(NLRP3);XM_011544049.1(NLRP3);XM_011544050.1(NLRP3);XM_011544051.1(NLRP3);XM_011544052.1(NLRP3);XM_011544053.1(NLRP3);XM_011544054.1(NLRP3);XM_011544055.1(NLRP3);
GO:0044546	NLRP3 inflammasome complex assembly	biological_process	16	35266	16	98659	0	0	2.79757	NM_001079821.2(NLRP3);NM_001127461.2(NLRP3);NM_001127462.2(NLRP3);NM_001243133.1(NLRP3);NM_004895.4(NLRP3);NM_183395.2(NLRP3);XM_005273036.2(NLRP3);XM_005273037.2(NLRP3);XM_011544048.1(NLRP3);XM_011544049.1(NLRP3);XM_011544050.1(NLRP3);XM_011544051.1(NLRP3);XM_011544052.1(NLRP3);XM_011544053.1(NLRP3);XM_011544054.1(NLRP3);XM_011544055.1(NLRP3);
GO:0050701	interleukin-1 secretion	biological_process	16	35266	16	98659	0	0	2.79757	NM_001079821.2(NLRP3);NM_001127461.2(NLRP3);NM_001127462.2(NLRP3);NM_001243133.1(NLRP3);NM_004895.4(NLRP3);NM_183395.2(NLRP3);XM_005273036.2(NLRP3);XM_005273037.2(NLRP3);XM_011544048.1(NLRP3);XM_011544049.1(NLRP3);XM_011544050.1(NLRP3);XM_011544051.1(NLRP3);XM_011544052.1(NLRP3);XM_011544053.1(NLRP3);XM_011544054.1(NLRP3);XM_011544055.1(NLRP3);
GO:2000321	positive regulation of T-helper 17 cell differentiation	biological_process	16	35266	16	98659	0	0	2.79757	NM_001079821.2(NLRP3);NM_001127461.2(NLRP3);NM_001127462.2(NLRP3);NM_001243133.1(NLRP3);NM_004895.4(NLRP3);NM_183395.2(NLRP3);XM_005273036.2(NLRP3);XM_005273037.2(NLRP3);XM_011544048.1(NLRP3);XM_011544049.1(NLRP3);XM_011544050.1(NLRP3);XM_011544051.1(NLRP3);XM_011544052.1(NLRP3);XM_011544053.1(NLRP3);XM_011544054.1(NLRP3);XM_011544055.1(NLRP3);
GO:0034212	peptide N-acetyltransferase activity	molecular_function	10	35266	10	98659	0	0	2.79757	NM_001079846.1(CREBBP);NM_001429.3(EP300);NM_004380.2(CREBBP);XM_005255124.3(CREBBP);XM_005255125.3(CREBBP);XM_006720848.2(CREBBP);XM_006724165.2(EP300);XM_011522380.1(CREBBP);XM_011522381.1(CREBBP);XM_011522382.1(CREBBP);
GO:0032901	positive regulation of neurotrophin production	biological_process	3	35266	3	98659	0	0	2.79757	NM_001079870.1(HAP1);NM_001079871.1(HAP1);NM_177977.2(HAP1);
GO:1902513	regulation of organelle transport along microtubule	biological_process	8	35266	8	98659	0	0	2.79757	NM_001079870.1(HAP1);NM_001079871.1(HAP1);NM_005561.3(LAMP1);NM_021076.3(NEFH);NM_177977.2(HAP1);XM_011530200.1(NEFH);XM_011537494.1(LAMP1);XM_011537495.1(LAMP1);
GO:0045218	zonula adherens maintenance	biological_process	33	35266	33	98659	0	0	2.79757	NM_001080429.2(CAMSAP3);NM_001130099.1(KIFC3);NM_001130100.1(KIFC3);NM_005550.3(KIFC3);NM_020902.1(CAMSAP3);NM_175058.4(PLEKHA7);XM_005255937.1(KIFC3);XM_005255944.1(KIFC3);XM_005272491.2(CAMSAP3);XM_006718149.2(PLEKHA7);XM_006721188.1(KIFC3);XM_006722806.2(CAMSAP3);XM_011519910.1(PLEKHA7);XM_011519911.1(PLEKHA7);XM_011519912.1(PLEKHA7);XM_011519913.1(PLEKHA7);XM_011519914.1(PLEKHA7);XM_011519915…
GO:0038089	positive regulation of cell migration by vascular endothelial growth factor signaling pathway	biological_process	3	35266	3	98659	0	0	2.79757	NM_001080779.1(MYO1C);NM_001080950.1(MYO1C);NM_033375.4(MYO1C);
GO:0045160	myosin I complex	cellular_component	3	35266	3	98659	0	0	2.79757	NM_001080779.1(MYO1C);NM_001080950.1(MYO1C);NM_033375.4(MYO1C);
GO:0072431	signal transduction involved in mitotic G1 DNA damage checkpoint	biological_process	4	35266	4	98659	0	0	2.79757	NM_001081640.1(PRKDC);NM_006904.6(PRKDC);XM_011517567.1(PRKDC);XM_011517568.1(PRKDC);
GO:0097681	double-strand break repair via alternative nonhomologous end joining	biological_process	13	35266	13	98659	0	0	2.79757	NM_001081640.1(PRKDC);NM_002311.4(LIG3);NM_006904.6(PRKDC);NM_013975.3(LIG3);NM_199420.3(POLQ);XM_005257970.2(LIG3);XM_006721896.2(LIG3);XM_011517567.1(PRKDC);XM_011517568.1(PRKDC);XM_011524797.1(LIG3);XM_011524798.1(LIG3);XM_011524799.1(LIG3);XM_011524800.1(LIG3);
GO:2001229	negative regulation of response to gamma radiation	biological_process	4	35266	4	98659	0	0	2.79757	NM_001081640.1(PRKDC);NM_006904.6(PRKDC);XM_011517567.1(PRKDC);XM_011517568.1(PRKDC);
GO:0097033	mitochondrial respiratory chain complex III biogenesis	biological_process	1	35266	1	98659	0	0	2.79757	NM_001085372.2(UQCC3);
GO:0097232	lamellar body membrane	cellular_component	1	35266	1	98659	0	0	2.79757	NM_001089.2(ABCA3);
GO:0003878	ATP citrate synthase activity	molecular_function	5	35266	5	98659	0	0	2.79757	NM_001096.2(ACLY);NM_001303274.1(ACLY);NM_001303275.1(ACLY);NM_198830.1(ACLY);XM_005257395.1(ACLY);
GO:0002077	acrosome matrix dispersal	biological_process	1	35266	1	98659	0	0	2.79757	NM_001097.2(ACR);
GO:0004040	amidase activity	molecular_function	1	35266	1	98659	0	0	2.79757	NM_001097.2(ACR);
GO:0003994	aconitate hydratase activity	molecular_function	5	35266	5	98659	0	0	2.79757	NM_001098.2(ACO2);NM_001278352.1(ACO1);NM_002197.2(ACO1);XM_005251476.1(ACO1);XM_011517888.1(ACO1);
GO:0003830	beta-1,4-mannosylglycoprotein 4-beta-N-acetylglucosaminyltransferase activity	molecular_function	16	35266	16	98659	0	0	2.79757	NM_001098270.1(MGAT3);NM_002409.4(MGAT3);XM_005261608.3(MGAT3);XM_005261609.2(MGAT3);XM_006724252.2(MGAT3);XM_011530184.1(MGAT3);XM_011530185.1(MGAT3);XM_011530186.1(MGAT3);XM_011530187.1(MGAT3);XM_011530188.1(MGAT3);XM_011530189.1(MGAT3);XM_011530190.1(MGAT3);XM_011530191.1(MGAT3);XM_011530192.1(MGAT3);XM_011530193.1(MGAT3);XM_011530194.1(MGAT3);
GO:0071818	BAT3 complex	cellular_component	170	35266	170	98659	0	0	2.79757	NM_001098534.1(BAG6);NM_001199697.1(BAG6);NM_001199698.1(BAG6);NM_004639.3(BAG6);NM_014235.4(UBL4A);NM_015949.2(GET4);NM_080702.2(BAG6);NM_080703.2(BAG6);XM_006715192.1(BAG6);XM_006715198.1(BAG6);XM_006715201.1(BAG6);XM_006715203.1(BAG6);XM_006725509.1(BAG6);XM_006725515.1(BAG6);XM_006725518.1(BAG6);XM_006725520.1(BAG6);XM_006725725.1(BAG6);XM_006725729.1(BAG6);XM_006725731.1(BAG6);XM_006725734.1…
GO:1904378	maintenance of unfolded protein involved in ERAD pathway	biological_process	171	35266	171	98659	0	0	2.79757	NM_001098534.1(BAG6);NM_001199697.1(BAG6);NM_001199698.1(BAG6);NM_003940.2(USP13);NM_004639.3(BAG6);NM_015949.2(GET4);NM_080702.2(BAG6);NM_080703.2(BAG6);XM_006715192.1(BAG6);XM_006715198.1(BAG6);XM_006715201.1(BAG6);XM_006715203.1(BAG6);XM_006725509.1(BAG6);XM_006725515.1(BAG6);XM_006725518.1(BAG6);XM_006725520.1(BAG6);XM_006725725.1(BAG6);XM_006725729.1(BAG6);XM_006725731.1(BAG6);XM_006725734.1…
GO:0036309	protein localization to M-band	biological_process	59	35266	59	98659	0	0	2.79757	NM_001098623.2(OBSCN);NM_001127493.1(ANK2);NM_001148.4(ANK2);NM_001271223.2(OBSCN);NM_020977.3(ANK2);NM_052843.3(OBSCN);XM_005262942.3(ANK2);XM_005262945.1(ANK2);XM_005262948.3(ANK2);XM_005273287.3(OBSCN);XM_005273288.3(OBSCN);XM_005273289.3(OBSCN);XM_005273290.3(OBSCN);XM_005273291.3(OBSCN);XM_005273292.3(OBSCN);XM_005273293.3(OBSCN);XM_005273294.3(OBSCN);XM_005273295.3(OBSCN);XM_005273296.3(OBS…
GO:0046890	regulation of lipid biosynthetic process	biological_process	4	35266	4	98659	0	0	2.79757	NM_001098790.1(MID1IP1);NM_001098791.1(MID1IP1);NM_003251.3(THRSP);NM_021242.5(MID1IP1);
GO:0060912	cardiac cell fate specification	biological_process	11	35266	11	98659	0	0	2.79757	NM_001098816.2(TENM4);XM_011544924.1(TENM4);XM_011544925.1(TENM4);XM_011544927.1(TENM4);XM_011544928.1(TENM4);XM_011544929.1(TENM4);XM_011544930.1(TENM4);XM_011544931.1(TENM4);XM_011544932.1(TENM4);XM_011544933.1(TENM4);XM_011544934.1(TENM4);
GO:0042748	circadian sleep/wake cycle, non-REM sleep	biological_process	9	35266	9	98659	0	0	2.79757	NM_001099272.1(BTBD9);NM_001172418.1(BTBD9);NM_052893.1(BTBD9);NM_152733.2(BTBD9);XM_005248841.2(BTBD9);XM_011514279.1(BTBD9);XM_011514280.1(BTBD9);XM_011514281.1(BTBD9);XM_011514282.1(BTBD9);
GO:1900242	regulation of synaptic vesicle endocytosis	biological_process	9	35266	9	98659	0	0	2.79757	NM_001099272.1(BTBD9);NM_001172418.1(BTBD9);NM_052893.1(BTBD9);NM_152733.2(BTBD9);XM_005248841.2(BTBD9);XM_011514279.1(BTBD9);XM_011514280.1(BTBD9);XM_011514281.1(BTBD9);XM_011514282.1(BTBD9);
GO:2001273	regulation of glucose import in response to insulin stimulus	biological_process	15	35266	15	98659	0	0	2.79757	NM_001099695.1(REPIN1);NM_001099696.2(REPIN1);NM_002507.3(NGFR);NM_013400.3(REPIN1);NM_014374.3(REPIN1);XM_005249985.1(REPIN1);XM_006715947.2(REPIN1);XM_006715948.2(REPIN1);XM_006715949.2(REPIN1);XM_006715950.2(REPIN1);XM_006715951.2(REPIN1);XM_006715952.2(REPIN1);XM_006715953.2(REPIN1);XM_011516111.1(REPIN1);XM_011516112.1(REPIN1);
GO:0002878	negative regulation of acute inflammatory response to non-antigenic stimulus	biological_process	3	35266	3	98659	0	0	2.79757	NM_001099733.1(ADCYAP1);NM_001117.4(ADCYAP1);XM_005258081.2(ADCYAP1);
GO:0016521	pituitary adenylate cyclase activating polypeptide activity	molecular_function	3	35266	3	98659	0	0	2.79757	NM_001099733.1(ADCYAP1);NM_001117.4(ADCYAP1);XM_005258081.2(ADCYAP1);
GO:0031858	pituitary adenylate cyclase-activating polypeptide receptor binding	molecular_function	3	35266	3	98659	0	0	2.79757	NM_001099733.1(ADCYAP1);NM_001117.4(ADCYAP1);XM_005258081.2(ADCYAP1);
GO:0061430	bone trabecula morphogenesis	biological_process	6	35266	6	98659	0	0	2.79757	NM_001100122.1(SBNO2);NM_014963.2(SBNO2);XM_005259519.3(SBNO2);XM_005259520.2(SBNO2);XM_011527803.1(SBNO2);XM_011527804.1(SBNO2);
GO:0071348	cellular response to interleukin-11	biological_process	6	35266	6	98659	0	0	2.79757	NM_001100122.1(SBNO2);NM_014963.2(SBNO2);XM_005259519.3(SBNO2);XM_005259520.2(SBNO2);XM_011527803.1(SBNO2);XM_011527804.1(SBNO2);
GO:1990830	cellular response to leukemia inhibitory factor	biological_process	6	35266	6	98659	0	0	2.79757	NM_001100122.1(SBNO2);NM_014963.2(SBNO2);XM_005259519.3(SBNO2);XM_005259520.2(SBNO2);XM_011527803.1(SBNO2);XM_011527804.1(SBNO2);
GO:0030128	clathrin coat of endocytic vesicle	cellular_component	3	35266	3	98659	0	0	2.79757	NM_001102664.1(EPN2);NM_014964.4(EPN2);NM_148921.3(EPN2);
GO:0061445	endocardial cushion cell fate commitment	biological_process	8	35266	8	98659	0	0	2.79757	NM_001105.4(ACVR1);NM_001111067.2(ACVR1);XM_005246939.2(ACVR1);XM_005246940.2(ACVR1);XM_006712825.2(ACVR1);XM_011512106.1(ACVR1);XM_011512107.1(ACVR1);XM_011512108.1(ACVR1);
GO:0042564	NLS-dependent protein nuclear import complex	cellular_component	3	35266	3	98659	0	0	2.79757	NM_001105538.1(MYBBP1A);NM_014520.3(MYBBP1A);XM_011523616.1(MYBBP1A);
GO:0033693	neurofilament bundle assembly	biological_process	5	35266	5	98659	0	0	2.79757	NM_001105541.1(NEFM);NM_005382.2(NEFM);NM_006158.4(NEFL);NM_021076.3(NEFH);XM_011530200.1(NEFH);
GO:0060386	synapse assembly involved in innervation	biological_process	1	35266	1	98659	0	0	2.79757	NM_001105573.1(FBXO45);
GO:0009132	nucleoside diphosphate metabolic process	biological_process	6	35266	6	98659	0	0	2.79757	NM_001105663.2(NUDT7);NM_001243657.1(NUDT7);NM_001243660.1(NUDT7);NM_001243661.1(NUDT7);XM_011523032.1(NUDT7);XM_011523033.1(NUDT7);
GO:0015938	coenzyme A catabolic process	biological_process	6	35266	6	98659	0	0	2.79757	NM_001105663.2(NUDT7);NM_001243657.1(NUDT7);NM_001243660.1(NUDT7);NM_001243661.1(NUDT7);XM_011523032.1(NUDT7);XM_011523033.1(NUDT7);
GO:0046356	acetyl-CoA catabolic process	biological_process	6	35266	6	98659	0	0	2.79757	NM_001105663.2(NUDT7);NM_001243657.1(NUDT7);NM_001243660.1(NUDT7);NM_001243661.1(NUDT7);XM_011523032.1(NUDT7);XM_011523033.1(NUDT7);
GO:0016362	activin receptor activity, type II	molecular_function	5	35266	5	98659	0	0	2.79757	NM_001106.3(ACVR2B);NM_001204.6(BMPR2);XM_005265583.2(ACVR2B);XM_011511687.1(BMPR2);XM_011511688.1(BMPR2);
GO:0032127	dense core granule membrane	cellular_component	6	35266	6	98659	0	0	2.79757	NM_001109.4(ADAM8);NM_001164489.1(ADAM8);NM_001164490.1(ADAM8);XM_011539116.1(ADAM8);XM_011539117.1(ADAM8);XM_011539118.1(ADAM8);
GO:0071133	alpha9-beta1 integrin-ADAM8 complex	cellular_component	6	35266	6	98659	0	0	2.79757	NM_001109.4(ADAM8);NM_001164489.1(ADAM8);NM_001164490.1(ADAM8);XM_011539116.1(ADAM8);XM_011539117.1(ADAM8);XM_011539118.1(ADAM8);
GO:2000415	positive regulation of fibronectin-dependent thymocyte migration	biological_process	6	35266	6	98659	0	0	2.79757	NM_001109.4(ADAM8);NM_001164489.1(ADAM8);NM_001164490.1(ADAM8);XM_011539116.1(ADAM8);XM_011539117.1(ADAM8);XM_011539118.1(ADAM8);
GO:0016479	negative regulation of transcription from RNA polymerase I promoter	biological_process	7	35266	7	98659	0	0	2.79757	NM_001110556.1(FLNA);NM_001456.3(FLNA);XM_011531127.1(FLNA);XM_011531128.1(FLNA);XM_011531129.1(FLNA);XM_011531130.1(FLNA);XM_011531131.1(FLNA);
GO:0003025	regulation of systemic arterial blood pressure by baroreceptor feedback	biological_process	23	35266	23	98659	0	0	2.79757	NM_001111018.1(NAV2);NM_001111019.2(NAV2);NM_001244963.1(NAV2);NM_145117.4(NAV2);NM_182964.5(NAV2);XM_005253214.3(NAV2);XM_006718364.2(NAV2);XM_006718365.2(NAV2);XM_006718366.2(NAV2);XM_006718367.2(NAV2);XM_006718368.2(NAV2);XM_006718369.1(NAV2);XM_011520444.1(NAV2);XM_011520445.1(NAV2);XM_011520446.1(NAV2);XM_011520447.1(NAV2);XM_011520448.1(NAV2);XM_011520449.1(NAV2);XM_011520450.1(NAV2);XM_011…
GO:0021563	glossopharyngeal nerve development	biological_process	23	35266	23	98659	0	0	2.79757	NM_001111018.1(NAV2);NM_001111019.2(NAV2);NM_001244963.1(NAV2);NM_145117.4(NAV2);NM_182964.5(NAV2);XM_005253214.3(NAV2);XM_006718364.2(NAV2);XM_006718365.2(NAV2);XM_006718366.2(NAV2);XM_006718367.2(NAV2);XM_006718368.2(NAV2);XM_006718369.1(NAV2);XM_011520444.1(NAV2);XM_011520445.1(NAV2);XM_011520446.1(NAV2);XM_011520447.1(NAV2);XM_011520448.1(NAV2);XM_011520449.1(NAV2);XM_011520450.1(NAV2);XM_011…
GO:0021564	vagus nerve development	biological_process	23	35266	23	98659	0	0	2.79757	NM_001111018.1(NAV2);NM_001111019.2(NAV2);NM_001244963.1(NAV2);NM_145117.4(NAV2);NM_182964.5(NAV2);XM_005253214.3(NAV2);XM_006718364.2(NAV2);XM_006718365.2(NAV2);XM_006718366.2(NAV2);XM_006718367.2(NAV2);XM_006718368.2(NAV2);XM_006718369.1(NAV2);XM_011520444.1(NAV2);XM_011520445.1(NAV2);XM_011520446.1(NAV2);XM_011520447.1(NAV2);XM_011520448.1(NAV2);XM_011520449.1(NAV2);XM_011520450.1(NAV2);XM_011…
GO:0044557	relaxation of smooth muscle	biological_process	5	35266	5	98659	0	0	2.79757	NM_001112800.1(SLC8A1);NM_001112801.1(SLC8A1);NM_001112802.1(SLC8A1);NM_001252624.1(SLC8A1);NM_021097.2(SLC8A1);
GO:0060401	cytosolic calcium ion transport	biological_process	6	35266	6	98659	0	0	2.79757	NM_001112800.1(SLC8A1);NM_001112801.1(SLC8A1);NM_001112802.1(SLC8A1);NM_001252624.1(SLC8A1);NM_001901.2(CTGF);NM_021097.2(SLC8A1);
GO:0097369	sodium ion import	biological_process	5	35266	5	98659	0	0	2.79757	NM_001112800.1(SLC8A1);NM_001112801.1(SLC8A1);NM_001112802.1(SLC8A1);NM_001252624.1(SLC8A1);NM_021097.2(SLC8A1);
GO:0010814	substance P catabolic process	biological_process	7	35266	7	98659	0	0	2.79757	NM_001113347.1(ECE1);NM_001113348.1(ECE1);NM_001113349.1(ECE1);NM_001397.2(ECE1);XM_006710398.1(ECE1);XM_011540872.1(ECE1);XM_011540873.1(ECE1);
GO:0010816	calcitonin catabolic process	biological_process	7	35266	7	98659	0	0	2.79757	NM_001113347.1(ECE1);NM_001113348.1(ECE1);NM_001113349.1(ECE1);NM_001397.2(ECE1);XM_006710398.1(ECE1);XM_011540872.1(ECE1);XM_011540873.1(ECE1);
GO:0031302	intrinsic component of endosome membrane	cellular_component	7	35266	7	98659	0	0	2.79757	NM_001113347.1(ECE1);NM_001113348.1(ECE1);NM_001113349.1(ECE1);NM_001397.2(ECE1);XM_006710398.1(ECE1);XM_011540872.1(ECE1);XM_011540873.1(ECE1);
GO:0034959	endothelin maturation	biological_process	7	35266	7	98659	0	0	2.79757	NM_001113347.1(ECE1);NM_001113348.1(ECE1);NM_001113349.1(ECE1);NM_001397.2(ECE1);XM_006710398.1(ECE1);XM_011540872.1(ECE1);XM_011540873.1(ECE1);
GO:0043532	angiostatin binding	molecular_function	9	35266	9	98659	0	0	2.79757	NM_001113490.1(AMOT);NM_016311.4(ATPIF1);NM_133265.2(AMOT);NM_178190.2(ATPIF1);NM_178191.2(ATPIF1);XM_005262087.1(AMOT);XM_005262088.2(AMOT);XM_005262090.1(AMOT);XM_011530875.1(AMOT);
GO:1901731	positive regulation of platelet aggregation	biological_process	25	35266	25	98659	0	0	2.79757	NM_001114135.3(DMTN);NM_001114136.2(DMTN);NM_001114137.2(DMTN);NM_001114138.2(DMTN);NM_001114139.2(DMTN);NM_001302816.1(DMTN);NM_001302817.1(DMTN);NM_001978.3(DMTN);XM_005273431.1(DMTN);XM_005273432.1(DMTN);XM_005273433.1(DMTN);XM_005273434.1(DMTN);XM_005273435.1(DMTN);XM_005273436.1(DMTN);XM_005273439.1(DMTN);XM_005273440.1(DMTN);XM_005273441.1(DMTN);XM_005273442.1(DMTN);XM_005273443.1(DMTN);XM_…
GO:0002362	CD4-positive, CD25-positive, alpha-beta regulatory T cell lineage commitment	biological_process	8	35266	8	98659	0	0	2.79757	NM_001114377.1(FOXP3);NM_014009.3(FOXP3);XM_006724533.2(FOXP3);XM_011543915.1(FOXP3);XM_011543916.1(FOXP3);XM_011543917.1(FOXP3);XM_011543918.1(FOXP3);XM_011543919.1(FOXP3);
GO:0002851	positive regulation of peripheral T cell tolerance induction	biological_process	8	35266	8	98659	0	0	2.79757	NM_001114377.1(FOXP3);NM_014009.3(FOXP3);XM_006724533.2(FOXP3);XM_011543915.1(FOXP3);XM_011543916.1(FOXP3);XM_011543917.1(FOXP3);XM_011543918.1(FOXP3);XM_011543919.1(FOXP3);
GO:0032831	positive regulation of CD4-positive, CD25-positive, alpha-beta regulatory T cell differentiation	biological_process	8	35266	8	98659	0	0	2.79757	NM_001114377.1(FOXP3);NM_014009.3(FOXP3);XM_006724533.2(FOXP3);XM_011543915.1(FOXP3);XM_011543916.1(FOXP3);XM_011543917.1(FOXP3);XM_011543918.1(FOXP3);XM_011543919.1(FOXP3);
GO:1902412	regulation of mitotic cytokinesis	biological_process	4	35266	4	98659	0	0	2.79757	NM_001115116.1(ANKRD53);NM_024933.3(ANKRD53);XM_005264569.3(ANKRD53);XM_011533114.1(ANKRD53);
GO:0000415	negative regulation of histone H3-K36 methylation	biological_process	12	35266	12	98659	0	0	2.79757	NM_001123383.1(BCOR);NM_001123384.1(BCOR);NM_001123385.1(BCOR);NM_017745.5(BCOR);XM_005272616.1(BCOR);XM_005272618.2(BCOR);XM_005272619.3(BCOR);XM_005272620.3(BCOR);XM_006724536.2(BCOR);XM_011543929.1(BCOR);XM_011543930.1(BCOR);XM_011543931.1(BCOR);
GO:0048073	regulation of eye pigmentation	biological_process	1	35266	1	98659	0	0	2.79757	NM_001124758.1(SPNS2);
GO:0045932	negative regulation of muscle contraction	biological_process	9	35266	9	98659	0	0	2.79757	NM_001126132.2(TNNT1);NM_001126133.2(TNNT1);NM_001291774.1(TNNT1);NM_003283.5(TNNT1);XM_006723343.2(TNNT1);XM_011527243.1(TNNT1);XM_011527244.1(TNNT1);XM_011527245.1(TNNT1);XM_011527246.1(TNNT1);
GO:0070105	positive regulation of interleukin-6-mediated signaling pathway	biological_process	6	35266	6	98659	0	0	2.79757	NM_001127215.1(GFI1);NM_001127216.1(GFI1);NM_005263.3(GFI1);XM_005270749.3(GFI1);XM_011541245.1(GFI1);XM_011541246.1(GFI1);
GO:0000719	photoreactive repair	biological_process	2	35266	2	98659	0	0	2.79757	NM_001127457.2(CRY2);NM_021117.3(CRY2);
GO:2000118	regulation of sodium-dependent phosphate transport	biological_process	2	35266	2	98659	0	0	2.79757	NM_001127457.2(CRY2);NM_021117.3(CRY2);
GO:0036371	protein localization to T-tubule	biological_process	14	35266	14	98659	0	0	2.79757	NM_001127493.1(ANK2);NM_001148.4(ANK2);NM_020977.3(ANK2);XM_005262942.3(ANK2);XM_005262945.1(ANK2);XM_005262948.3(ANK2);XM_006714188.2(ANK2);XM_006714189.2(ANK2);XM_006714190.2(ANK2);XM_006714191.2(ANK2);XM_006714192.2(ANK2);XM_006714193.2(ANK2);XM_006714194.2(ANK2);XM_011531891.1(ANK2);
GO:0086066	atrial cardiac muscle cell to AV node cell communication	biological_process	14	35266	14	98659	0	0	2.79757	NM_001127493.1(ANK2);NM_001148.4(ANK2);NM_020977.3(ANK2);XM_005262942.3(ANK2);XM_005262945.1(ANK2);XM_005262948.3(ANK2);XM_006714188.2(ANK2);XM_006714189.2(ANK2);XM_006714190.2(ANK2);XM_006714191.2(ANK2);XM_006714192.2(ANK2);XM_006714193.2(ANK2);XM_006714194.2(ANK2);XM_011531891.1(ANK2);
GO:0086070	SA node cell to atrial cardiac muscle cell communication	biological_process	14	35266	14	98659	0	0	2.79757	NM_001127493.1(ANK2);NM_001148.4(ANK2);NM_020977.3(ANK2);XM_005262942.3(ANK2);XM_005262945.1(ANK2);XM_005262948.3(ANK2);XM_006714188.2(ANK2);XM_006714189.2(ANK2);XM_006714190.2(ANK2);XM_006714191.2(ANK2);XM_006714192.2(ANK2);XM_006714193.2(ANK2);XM_006714194.2(ANK2);XM_011531891.1(ANK2);
GO:1901021	positive regulation of calcium ion transmembrane transporter activity	biological_process	14	35266	14	98659	0	0	2.79757	NM_001127493.1(ANK2);NM_001148.4(ANK2);NM_020977.3(ANK2);XM_005262942.3(ANK2);XM_005262945.1(ANK2);XM_005262948.3(ANK2);XM_006714188.2(ANK2);XM_006714189.2(ANK2);XM_006714190.2(ANK2);XM_006714191.2(ANK2);XM_006714192.2(ANK2);XM_006714193.2(ANK2);XM_006714194.2(ANK2);XM_011531891.1(ANK2);
GO:0031129	inductive cell-cell signaling	biological_process	5	35266	5	98659	0	0	2.79757	NM_001127892.1(SALL1);NM_002968.2(SALL1);XM_006721241.2(SALL1);XM_011523254.1(SALL1);XM_011523255.1(SALL1);
GO:0072073	kidney epithelium development	biological_process	5	35266	5	98659	0	0	2.79757	NM_001127892.1(SALL1);NM_002968.2(SALL1);XM_006721241.2(SALL1);XM_011523254.1(SALL1);XM_011523255.1(SALL1);
GO:0016999	antibiotic metabolic process	biological_process	6	35266	6	98659	0	0	2.79757	NM_001128141.2(DPEP1);NM_004413.3(DPEP1);XM_005256285.3(DPEP1);XM_005256286.2(DPEP1);XM_011522925.1(DPEP1);XM_011522926.1(DPEP1);
GO:0072340	cellular lactam catabolic process	biological_process	6	35266	6	98659	0	0	2.79757	NM_001128141.2(DPEP1);NM_004413.3(DPEP1);XM_005256285.3(DPEP1);XM_005256286.2(DPEP1);XM_011522925.1(DPEP1);XM_011522926.1(DPEP1);
GO:0061448	connective tissue development	biological_process	2	35266	2	98659	0	0	2.79757	NM_001128225.2(SLC39A13);NM_152264.4(SLC39A13);
GO:0002448	mast cell mediated immunity	biological_process	3	35266	3	98659	0	0	2.79757	NM_001128325.2(SPON2);NM_001199021.1(SPON2);NM_012445.3(SPON2);
GO:0035650	AP-1 adaptor complex binding	molecular_function	6	35266	6	98659	0	0	2.79757	NM_001128426.1(AP1AR);NM_006834.3(RAB32);NM_018569.4(AP1AR);NM_022337.2(RAB38);XM_005263116.1(AP1AR);XM_011532100.1(AP1AR);
GO:0010428	methyl-CpNpG binding	molecular_function	5	35266	5	98659	0	0	2.79757	NM_001128833.1(ZBTB4);NM_020899.3(ZBTB4);XM_006721563.2(ZBTB4);XM_006721564.1(ZBTB4);XM_011523972.1(ZBTB4);
GO:0061364	apoptotic process involved in luteolysis	biological_process	19	35266	19	98659	0	0	2.79757	NM_001128929.3(ROBO2);NM_001271946.1(SLIT3);NM_001289135.1(SLIT2);NM_001289136.1(SLIT2);NM_001290039.1(ROBO2);NM_001290040.1(ROBO2);NM_001290065.1(ROBO2);NM_002942.4(ROBO2);NM_003062.3(SLIT3);NM_004787.2(SLIT2);XM_005248211.2(SLIT2);XM_006713986.2(SLIT2);XM_011513909.1(SLIT2);XM_011513910.1(SLIT2);XM_011533981.1(ROBO2);XM_011533982.1(ROBO2);XM_011533983.1(ROBO2);XM_011533984.1(ROBO2);XM_011533985…
GO:0002696	positive regulation of leukocyte activation	biological_process	3	35266	3	98659	0	0	2.79757	NM_001130011.1(TEX101);NM_031451.4(TEX101);XM_005259303.2(TEX101);
GO:0004824	lysine-tRNA ligase activity	molecular_function	2	35266	2	98659	0	0	2.79757	NM_001130089.1(KARS);NM_005548.2(KARS);
GO:0006430	lysyl-tRNA aminoacylation	biological_process	2	35266	2	98659	0	0	2.79757	NM_001130089.1(KARS);NM_005548.2(KARS);
GO:0008569	ATP-dependent microtubule motor activity, minus-end-directed	molecular_function	17	35266	17	98659	0	0	2.79757	NM_001130099.1(KIFC3);NM_001130100.1(KIFC3);NM_005550.3(KIFC3);XM_005255937.1(KIFC3);XM_005255944.1(KIFC3);XM_006721188.1(KIFC3);XM_011523070.1(KIFC3);XM_011523071.1(KIFC3);XM_011523072.1(KIFC3);XM_011523073.1(KIFC3);XM_011523074.1(KIFC3);XM_011523075.1(KIFC3);XM_011523076.1(KIFC3);XM_011523077.1(KIFC3);XM_011523078.1(KIFC3);XM_011523079.1(KIFC3);XM_011523080.1(KIFC3);
GO:0035620	ceramide transporter activity	molecular_function	6	35266	6	98659	0	0	2.79757	NM_001130105.1(COL4A3BP);NM_005713.2(COL4A3BP);NM_031361.2(COL4A3BP);XM_006714513.1(COL4A3BP);XM_011543090.1(COL4A3BP);XM_011543091.1(COL4A3BP);
GO:1901858	regulation of mitochondrial DNA metabolic process	biological_process	5	35266	5	98659	0	0	2.79757	NM_001130159.2(STOX1);NM_001130160.2(STOX1);NM_001130161.2(STOX1);NM_152709.4(STOX1);XM_011539454.1(STOX1);
GO:1902882	regulation of response to oxidative stress	biological_process	5	35266	5	98659	0	0	2.79757	NM_001130159.2(STOX1);NM_001130160.2(STOX1);NM_001130161.2(STOX1);NM_152709.4(STOX1);XM_011539454.1(STOX1);
GO:1904120	positive regulation of otic vesicle morphogenesis	biological_process	5	35266	5	98659	0	0	2.79757	NM_001130159.2(STOX1);NM_001130160.2(STOX1);NM_001130161.2(STOX1);NM_152709.4(STOX1);XM_011539454.1(STOX1);
GO:0032764	negative regulation of mast cell cytokine production	biological_process	6	35266	6	98659	0	0	2.79757	NM_001130845.1(BCL6);NM_001134738.1(BCL6);NM_001706.4(BCL6);NM_002133.2(HMOX1);XM_005247694.2(BCL6);XM_011513062.1(BCL6);
GO:0043380	regulation of memory T cell differentiation	biological_process	5	35266	5	98659	0	0	2.79757	NM_001130845.1(BCL6);NM_001134738.1(BCL6);NM_001706.4(BCL6);XM_005247694.2(BCL6);XM_011513062.1(BCL6);
GO:0010609	mRNA localization resulting in posttranscriptional regulation of gene expression	biological_process	15	35266	15	98659	0	0	2.79757	NM_001130967.2(ZNF385A);NM_001130968.2(ZNF385A);NM_001174118.1(MEX3D);NM_001290001.1(ZNF385A);NM_001290002.1(ZNF385A);NM_001290004.1(ZNF385A);NM_015481.2(ZNF385A);NM_203304.3(MEX3D);XM_005268783.3(ZNF385A);XM_006719342.2(ZNF385A);XM_011528012.1(MEX3D);XM_011538168.1(ZNF385A);XM_011538169.1(ZNF385A);XM_011538170.1(ZNF385A);XM_011538171.1(ZNF385A);
GO:1902164	positive regulation of DNA damage response, signal transduction by p53 class mediator resulting in transcription of p21 class mediator	biological_process	12	35266	12	98659	0	0	2.79757	NM_001130967.2(ZNF385A);NM_001130968.2(ZNF385A);NM_001290001.1(ZNF385A);NM_001290002.1(ZNF385A);NM_001290004.1(ZNF385A);NM_015481.2(ZNF385A);XM_005268783.3(ZNF385A);XM_006719342.2(ZNF385A);XM_011538168.1(ZNF385A);XM_011538169.1(ZNF385A);XM_011538170.1(ZNF385A);XM_011538171.1(ZNF385A);
GO:2000765	regulation of cytoplasmic translation	biological_process	12	35266	12	98659	0	0	2.79757	NM_001130967.2(ZNF385A);NM_001130968.2(ZNF385A);NM_001290001.1(ZNF385A);NM_001290002.1(ZNF385A);NM_001290004.1(ZNF385A);NM_015481.2(ZNF385A);XM_005268783.3(ZNF385A);XM_006719342.2(ZNF385A);XM_011538168.1(ZNF385A);XM_011538169.1(ZNF385A);XM_011538170.1(ZNF385A);XM_011538171.1(ZNF385A);
GO:0003138	primary heart field specification	biological_process	20	35266	20	98659	0	0	2.79757	NM_001131005.2(MEF2C);NM_001193347.1(MEF2C);NM_001193348.1(MEF2C);NM_001193349.1(MEF2C);NM_001193350.1(MEF2C);NM_002397.4(MEF2C);XM_005248511.1(MEF2C);XM_006714618.1(MEF2C);XM_006714619.1(MEF2C);XM_006714625.2(MEF2C);XM_011543396.1(MEF2C);XM_011543397.1(MEF2C);XM_011543398.1(MEF2C);XM_011543399.1(MEF2C);XM_011543400.1(MEF2C);XM_011543401.1(MEF2C);XM_011543402.1(MEF2C);XM_011543403.1(MEF2C);XM_011…
GO:0003185	sinoatrial valve morphogenesis	biological_process	20	35266	20	98659	0	0	2.79757	NM_001131005.2(MEF2C);NM_001193347.1(MEF2C);NM_001193348.1(MEF2C);NM_001193349.1(MEF2C);NM_001193350.1(MEF2C);NM_002397.4(MEF2C);XM_005248511.1(MEF2C);XM_006714618.1(MEF2C);XM_006714619.1(MEF2C);XM_006714625.2(MEF2C);XM_011543396.1(MEF2C);XM_011543397.1(MEF2C);XM_011543398.1(MEF2C);XM_011543399.1(MEF2C);XM_011543400.1(MEF2C);XM_011543401.1(MEF2C);XM_011543402.1(MEF2C);XM_011543403.1(MEF2C);XM_011…
GO:0007521	muscle cell fate determination	biological_process	23	35266	23	98659	0	0	2.79757	NM_001131005.2(MEF2C);NM_001193347.1(MEF2C);NM_001193348.1(MEF2C);NM_001193349.1(MEF2C);NM_001193350.1(MEF2C);NM_002397.4(MEF2C);NM_005994.3(TBX2);XM_005248511.1(MEF2C);XM_006714618.1(MEF2C);XM_006714619.1(MEF2C);XM_006714625.2(MEF2C);XM_011525158.1(TBX2);XM_011525159.1(TBX2);XM_011543396.1(MEF2C);XM_011543397.1(MEF2C);XM_011543398.1(MEF2C);XM_011543399.1(MEF2C);XM_011543400.1(MEF2C);XM_011543401…
GO:0035984	cellular response to trichostatin A	biological_process	22	35266	22	98659	0	0	2.79757	NM_001131005.2(MEF2C);NM_001193347.1(MEF2C);NM_001193348.1(MEF2C);NM_001193349.1(MEF2C);NM_001193350.1(MEF2C);NM_001429.3(EP300);NM_002397.4(MEF2C);XM_005248511.1(MEF2C);XM_006714618.1(MEF2C);XM_006714619.1(MEF2C);XM_006714625.2(MEF2C);XM_006724165.2(EP300);XM_011543396.1(MEF2C);XM_011543397.1(MEF2C);XM_011543398.1(MEF2C);XM_011543399.1(MEF2C);XM_011543400.1(MEF2C);XM_011543401.1(MEF2C);XM_011543…
GO:0060025	regulation of synaptic activity	biological_process	20	35266	20	98659	0	0	2.79757	NM_001131005.2(MEF2C);NM_001193347.1(MEF2C);NM_001193348.1(MEF2C);NM_001193349.1(MEF2C);NM_001193350.1(MEF2C);NM_002397.4(MEF2C);XM_005248511.1(MEF2C);XM_006714618.1(MEF2C);XM_006714619.1(MEF2C);XM_006714625.2(MEF2C);XM_011543396.1(MEF2C);XM_011543397.1(MEF2C);XM_011543398.1(MEF2C);XM_011543399.1(MEF2C);XM_011543400.1(MEF2C);XM_011543401.1(MEF2C);XM_011543402.1(MEF2C);XM_011543403.1(MEF2C);XM_011…
GO:0060297	regulation of sarcomere organization	biological_process	23	35266	23	98659	0	0	2.79757	NM_001131005.2(MEF2C);NM_001193347.1(MEF2C);NM_001193348.1(MEF2C);NM_001193349.1(MEF2C);NM_001193350.1(MEF2C);NM_001270546.1(AKAP13);NM_002397.4(MEF2C);NM_006738.5(AKAP13);NM_007200.4(AKAP13);XM_005248511.1(MEF2C);XM_006714618.1(MEF2C);XM_006714619.1(MEF2C);XM_006714625.2(MEF2C);XM_011543396.1(MEF2C);XM_011543397.1(MEF2C);XM_011543398.1(MEF2C);XM_011543399.1(MEF2C);XM_011543400.1(MEF2C);XM_011543…
GO:0060536	cartilage morphogenesis	biological_process	26	35266	26	98659	0	0	2.79757	NM_001131005.2(MEF2C);NM_001193347.1(MEF2C);NM_001193348.1(MEF2C);NM_001193349.1(MEF2C);NM_001193350.1(MEF2C);NM_002397.4(MEF2C);NM_002448.3(MSX1);NM_003068.4(SNAI2);NM_004821.2(HAND1);NM_005985.3(SNAI1);NM_021973.2(HAND2);XM_005248511.1(MEF2C);XM_005268531.1(HAND1);XM_006714618.1(MEF2C);XM_006714619.1(MEF2C);XM_006714625.2(MEF2C);XM_011543396.1(MEF2C);XM_011543397.1(MEF2C);XM_011543398.1(MEF2C);…
GO:0010625	positive regulation of Schwann cell proliferation	biological_process	3	35266	3	98659	0	0	2.79757	NM_001131019.2(GFAP);NM_001242376.1(GFAP);NM_002055.4(GFAP);
GO:0051580	regulation of neurotransmitter uptake	biological_process	3	35266	3	98659	0	0	2.79757	NM_001131019.2(GFAP);NM_001242376.1(GFAP);NM_002055.4(GFAP);
GO:0008700	4-hydroxy-2-oxoglutarate aldolase activity	molecular_function	2	35266	2	98659	0	0	2.79757	NM_001134670.1(HOGA1);NM_138413.3(HOGA1);
GO:0033609	oxalate metabolic process	biological_process	2	35266	2	98659	0	0	2.79757	NM_001134670.1(HOGA1);NM_138413.3(HOGA1);
GO:0040040	thermosensory behavior	biological_process	2	35266	2	98659	0	0	2.79757	NM_001134771.1(SLC12A5);NM_020708.4(SLC12A5);
GO:0016938	kinesin I complex	cellular_component	8	35266	8	98659	0	0	2.79757	NM_001134774.1(KLC2);NM_001134775.1(KLC2);NM_001134776.1(KLC2);NM_022822.2(KLC2);XM_005274182.1(KLC2);XM_005274183.1(KLC2);XM_005274184.1(KLC2);XM_006718665.1(KLC2);
GO:0098632	protein binding involved in cell-cell adhesion	molecular_function	4	35266	4	98659	0	0	2.79757	NM_001135050.1(IGSF9);NM_020789.3(IGSF9);XM_011509809.1(IGSF9);XM_011509810.1(IGSF9);
GO:0034224	cellular response to zinc ion starvation	biological_process	5	35266	5	98659	0	0	2.79757	NM_001135195.1(SLC39A5);NM_001280557.1(SLC39A4);NM_017767.2(SLC39A4);NM_130849.3(SLC39A4);NM_173596.2(SLC39A5);
GO:0014813	skeletal muscle satellite cell commitment	biological_process	3	35266	3	98659	0	0	2.79757	NM_001135254.1(PAX7);NM_002584.2(PAX7);NM_013945.2(PAX7);
GO:0017130	poly(C) RNA binding	molecular_function	3	35266	3	98659	0	0	2.79757	NM_001135653.1(PABPC4);NM_001135654.1(PABPC4);NM_003819.3(PABPC4);
GO:0090126	protein complex assembly involved in synapse maturation	biological_process	26	35266	26	98659	0	0	2.79757	NM_001135659.1(NRXN1);NM_004801.4(NRXN1);NM_138735.2(NRXN1);XM_005264642.2(NRXN1);XM_005264643.2(NRXN1);XM_006712137.2(NRXN1);XM_006712140.2(NRXN1);XM_006712141.2(NRXN1);XM_011533167.1(NRXN1);XM_011533168.1(NRXN1);XM_011533169.1(NRXN1);XM_011533170.1(NRXN1);XM_011533171.1(NRXN1);XM_011533172.1(NRXN1);XM_011533173.1(NRXN1);XM_011533174.1(NRXN1);XM_011533175.1(NRXN1);XM_011533176.1(NRXN1);XM_011533…
GO:0097117	guanylate kinase-associated protein clustering	biological_process	27	35266	27	98659	0	0	2.79757	NM_001135659.1(NRXN1);NM_004801.4(NRXN1);NM_033517.1(SHANK3);NM_138735.2(NRXN1);XM_005264642.2(NRXN1);XM_005264643.2(NRXN1);XM_006712137.2(NRXN1);XM_006712140.2(NRXN1);XM_006712141.2(NRXN1);XM_011533167.1(NRXN1);XM_011533168.1(NRXN1);XM_011533169.1(NRXN1);XM_011533170.1(NRXN1);XM_011533171.1(NRXN1);XM_011533172.1(NRXN1);XM_011533173.1(NRXN1);XM_011533174.1(NRXN1);XM_011533175.1(NRXN1);XM_01153317…
GO:0042025	host cell nucleus	cellular_component	1	35266	1	98659	0	0	2.79757	NM_001136002.1(TMEM229A);
GO:0006480	N-terminal protein amino acid methylation	biological_process	4	35266	4	98659	0	0	2.79757	NM_001136107.1(METTL11B);XM_011509232.1(METTL11B);XM_011509233.1(METTL11B);XM_011509234.1(METTL11B);
GO:0070563	negative regulation of vitamin D receptor signaling pathway	biological_process	3	35266	3	98659	0	0	2.79757	NM_001136191.2(KANK2);NM_003068.4(SNAI2);NM_015493.6(KANK2);
GO:0034506	chromosome, centromeric core domain	cellular_component	2	35266	2	98659	0	0	2.79757	NM_001136204.2(RCC2);NM_018715.3(RCC2);
GO:0072356	chromosome passenger complex localization to kinetochore	biological_process	2	35266	2	98659	0	0	2.79757	NM_001136204.2(RCC2);NM_018715.3(RCC2);
GO:1990136	linoleate 9S-lipoxygenase activity	molecular_function	1	35266	1	98659	0	0	2.79757	NM_001139.2(ALOX12B);
GO:0016243	regulation of autophagosome size	biological_process	13	35266	13	98659	0	0	2.79757	NM_001141973.2(ATP13A2);NM_001141974.2(ATP13A2);NM_022089.3(ATP13A2);XM_005245809.1(ATP13A2);XM_005245810.1(ATP13A2);XM_005245811.1(ATP13A2);XM_005245812.1(ATP13A2);XM_005245813.1(ATP13A2);XM_005245815.1(ATP13A2);XM_006710512.1(ATP13A2);XM_006710513.1(ATP13A2);XM_011541128.1(ATP13A2);XM_011541129.1(ATP13A2);
GO:1903362	regulation of cellular protein catabolic process	biological_process	13	35266	13	98659	0	0	2.79757	NM_001141973.2(ATP13A2);NM_001141974.2(ATP13A2);NM_022089.3(ATP13A2);XM_005245809.1(ATP13A2);XM_005245810.1(ATP13A2);XM_005245811.1(ATP13A2);XM_005245812.1(ATP13A2);XM_005245813.1(ATP13A2);XM_005245815.1(ATP13A2);XM_006710512.1(ATP13A2);XM_006710513.1(ATP13A2);XM_011541128.1(ATP13A2);XM_011541129.1(ATP13A2);
GO:1905037	autophagosome organization	biological_process	13	35266	13	98659	0	0	2.79757	NM_001141973.2(ATP13A2);NM_001141974.2(ATP13A2);NM_022089.3(ATP13A2);XM_005245809.1(ATP13A2);XM_005245810.1(ATP13A2);XM_005245811.1(ATP13A2);XM_005245812.1(ATP13A2);XM_005245813.1(ATP13A2);XM_005245815.1(ATP13A2);XM_006710512.1(ATP13A2);XM_006710513.1(ATP13A2);XM_011541128.1(ATP13A2);XM_011541129.1(ATP13A2);
GO:1905103	integral component of lysosomal membrane	cellular_component	13	35266	13	98659	0	0	2.79757	NM_001141973.2(ATP13A2);NM_001141974.2(ATP13A2);NM_022089.3(ATP13A2);XM_005245809.1(ATP13A2);XM_005245810.1(ATP13A2);XM_005245811.1(ATP13A2);XM_005245812.1(ATP13A2);XM_005245813.1(ATP13A2);XM_005245815.1(ATP13A2);XM_006710512.1(ATP13A2);XM_006710513.1(ATP13A2);XM_011541128.1(ATP13A2);XM_011541129.1(ATP13A2);
GO:1905122	polyamine import	biological_process	13	35266	13	98659	0	0	2.79757	NM_001141973.2(ATP13A2);NM_001141974.2(ATP13A2);NM_022089.3(ATP13A2);XM_005245809.1(ATP13A2);XM_005245810.1(ATP13A2);XM_005245811.1(ATP13A2);XM_005245812.1(ATP13A2);XM_005245813.1(ATP13A2);XM_005245815.1(ATP13A2);XM_006710512.1(ATP13A2);XM_006710513.1(ATP13A2);XM_011541128.1(ATP13A2);XM_011541129.1(ATP13A2);
GO:1905165	regulation of lysosomal protein catabolic process	biological_process	13	35266	13	98659	0	0	2.79757	NM_001141973.2(ATP13A2);NM_001141974.2(ATP13A2);NM_022089.3(ATP13A2);XM_005245809.1(ATP13A2);XM_005245810.1(ATP13A2);XM_005245811.1(ATP13A2);XM_005245812.1(ATP13A2);XM_005245813.1(ATP13A2);XM_005245815.1(ATP13A2);XM_006710512.1(ATP13A2);XM_006710513.1(ATP13A2);XM_011541128.1(ATP13A2);XM_011541129.1(ATP13A2);
GO:1905166	negative regulation of lysosomal protein catabolic process	biological_process	13	35266	13	98659	0	0	2.79757	NM_001141973.2(ATP13A2);NM_001141974.2(ATP13A2);NM_022089.3(ATP13A2);XM_005245809.1(ATP13A2);XM_005245810.1(ATP13A2);XM_005245811.1(ATP13A2);XM_005245812.1(ATP13A2);XM_005245813.1(ATP13A2);XM_005245815.1(ATP13A2);XM_006710512.1(ATP13A2);XM_006710513.1(ATP13A2);XM_011541128.1(ATP13A2);XM_011541129.1(ATP13A2);
GO:1990938	peptidyl-aspartic acid autophosphorylation	biological_process	13	35266	13	98659	0	0	2.79757	NM_001141973.2(ATP13A2);NM_001141974.2(ATP13A2);NM_022089.3(ATP13A2);XM_005245809.1(ATP13A2);XM_005245810.1(ATP13A2);XM_005245811.1(ATP13A2);XM_005245812.1(ATP13A2);XM_005245813.1(ATP13A2);XM_005245815.1(ATP13A2);XM_006710512.1(ATP13A2);XM_006710513.1(ATP13A2);XM_011541128.1(ATP13A2);XM_011541129.1(ATP13A2);
GO:0031592	centrosomal corona	cellular_component	25	35266	25	98659	0	0	2.79757	NM_001142273.1(CLASP1);NM_001142274.1(CLASP1);NM_001207051.1(CLASP1);NM_015282.2(CLASP1);XM_006712373.1(CLASP1);XM_006712374.1(CLASP1);XM_006712375.1(CLASP1);XM_006712377.1(CLASP1);XM_006712381.1(CLASP1);XM_006712382.1(CLASP1);XM_006712383.1(CLASP1);XM_006712385.1(CLASP1);XM_011510841.1(CLASP1);XM_011510842.1(CLASP1);XM_011510843.1(CLASP1);XM_011510844.1(CLASP1);XM_011510845.1(CLASP1);XM_01151084…
GO:0015077	monovalent inorganic cation transmembrane transporter activity	molecular_function	2	35266	2	98659	0	0	2.79757	NM_001142447.2(ATP1B4);NM_012069.4(ATP1B4);
GO:0051341	regulation of oxidoreductase activity	biological_process	4	35266	4	98659	0	0	2.79757	NM_001142464.2(ECSIT);NM_001142465.2(ECSIT);NM_001243204.1(ECSIT);NM_016581.4(ECSIT);
GO:0042851	L-alanine metabolic process	biological_process	2	35266	2	98659	0	0	2.79757	NM_001142466.1(GPT2);NM_133443.2(GPT2);
GO:0003229	ventricular cardiac muscle tissue development	biological_process	3	35266	3	98659	0	0	2.79757	NM_001142502.1(PPP1R13L);NM_002356.6(MARCKS);NM_006663.3(PPP1R13L);
GO:0006670	sphingosine metabolic process	biological_process	10	35266	10	98659	0	0	2.79757	NM_001142601.1(SPHK1);NM_001142602.1(SPHK1);NM_021972.3(SPHK1);NM_030791.3(SGPP1);NM_152386.2(SGPP2);NM_182965.2(SPHK1);XM_005246297.2(SGPP2);XM_005257766.2(SPHK1);XM_006720264.1(SGPP1);XM_011525439.1(SPHK1);
GO:0046521	sphingoid catabolic process	biological_process	6	35266	6	98659	0	0	2.79757	NM_001142601.1(SPHK1);NM_001142602.1(SPHK1);NM_021972.3(SPHK1);NM_182965.2(SPHK1);XM_005257766.2(SPHK1);XM_011525439.1(SPHK1);
GO:0004102	choline O-acetyltransferase activity	molecular_function	7	35266	7	98659	0	0	2.79757	NM_001142929.1(CHAT);NM_001142933.1(CHAT);NM_001142934.1(CHAT);NM_020549.4(CHAT);NM_020984.3(CHAT);NM_020985.3(CHAT);NM_020986.3(CHAT);
GO:0052731	phosphocholine phosphatase activity	molecular_function	5	35266	5	98659	0	0	2.79757	NM_001143804.1(PHOSPHO1);NM_178500.3(PHOSPHO1);XM_005257109.2(PHOSPHO1);XM_006721731.2(PHOSPHO1);XM_006721732.2(PHOSPHO1);
GO:0052732	phosphoethanolamine phosphatase activity	molecular_function	5	35266	5	98659	0	0	2.79757	NM_001143804.1(PHOSPHO1);NM_178500.3(PHOSPHO1);XM_005257109.2(PHOSPHO1);XM_006721731.2(PHOSPHO1);XM_006721732.2(PHOSPHO1);
GO:0031550	positive regulation of brain-derived neurotrophic factor receptor signaling pathway	biological_process	18	35266	18	98659	0	0	2.79757	NM_001143805.1(BDNF);NM_001143806.1(BDNF);NM_001143807.1(BDNF);NM_001143808.1(BDNF);NM_001143809.1(BDNF);NM_001143810.1(BDNF);NM_001143811.1(BDNF);NM_001143812.1(BDNF);NM_001143813.1(BDNF);NM_001143814.1(BDNF);NM_001143816.1(BDNF);NM_001709.4(BDNF);NM_170731.4(BDNF);NM_170732.4(BDNF);NM_170733.3(BDNF);NM_170734.3(BDNF);NM_170735.5(BDNF);XM_011520280.1(BDNF);
GO:0008962	phosphatidylglycerophosphatase activity	molecular_function	2	35266	2	98659	0	0	2.79757	NM_001143984.1(PTPMT1);NM_175732.2(PTPMT1);
GO:0000838	Hrd1p ubiquitin ligase ERAD-M complex	cellular_component	3	35266	3	98659	0	0	2.79757	NM_001144.5(AMFR);XM_005255889.2(AMFR);XM_005255890.2(AMFR);
GO:2000299	negative regulation of Rho-dependent protein serine/threonine kinase activity	biological_process	5	35266	5	98659	0	0	2.79757	NM_001144073.1(CHORDC1);NM_012124.2(CHORDC1);XM_011542747.1(CHORDC1);XM_011542748.1(CHORDC1);XM_011542749.1(CHORDC1);
GO:0005427	proton-dependent oligopeptide secondary active transmembrane transporter activity	molecular_function	4	35266	4	98659	0	0	2.79757	NM_001144663.1(CDH17);NM_004063.3(CDH17);NM_005073.3(SLC15A1);XM_011516790.1(CDH17);
GO:0033626	positive regulation of integrin activation by cell surface receptor linked signal transduction	biological_process	3	35266	3	98659	0	0	2.79757	NM_001144663.1(CDH17);NM_004063.3(CDH17);XM_011516790.1(CDH17);
GO:0035672	oligopeptide transmembrane transport	biological_process	9	35266	9	98659	0	0	2.79757	NM_001144663.1(CDH17);NM_001243013.1(ABCB9);NM_001243014.1(ABCB9);NM_004063.3(CDH17);NM_005073.3(SLC15A1);NM_019624.3(ABCB9);NM_019625.3(ABCB9);NM_203444.3(ABCB9);XM_011516790.1(CDH17);
GO:0000173	inactivation of MAPK activity involved in osmosensory signaling pathway	biological_process	6	35266	6	98659	0	0	2.79757	NM_001144891.1(MBIP);NM_016586.2(MBIP);XM_005267754.2(MBIP);XM_005267755.2(MBIP);XM_005267756.3(MBIP);XM_011536833.1(MBIP);
GO:0042494	detection of bacterial lipoprotein	biological_process	4	35266	4	98659	0	0	2.79757	NM_001144950.1(SSC5D);NM_001195267.1(SSC5D);XM_011526758.1(SSC5D);XM_011526759.1(SSC5D);
GO:2001069	glycogen binding	molecular_function	5	35266	5	98659	0	0	2.79757	NM_001145115.2(PPP1R3G);NM_001184745.1(PPP1R3F);NM_003943.4(STBD1);NM_033215.4(PPP1R3F);XM_005272687.2(PPP1R3F);
GO:0010578	regulation of adenylate cyclase activity involved in G-protein coupled receptor signaling pathway	biological_process	6	35266	6	98659	0	0	2.79757	NM_001145146.1(CRHR1);NM_001145147.1(CRHR1);NM_001145148.1(CRHR1);NM_001303018.1(CRHR1);NM_001303020.1(CRHR1);NM_004382.4(CRHR1);
GO:0051458	corticotropin secretion	biological_process	6	35266	6	98659	0	0	2.79757	NM_001145146.1(CRHR1);NM_001145147.1(CRHR1);NM_001145148.1(CRHR1);NM_001303018.1(CRHR1);NM_001303020.1(CRHR1);NM_004382.4(CRHR1);
GO:0005457	GDP-fucose transmembrane transporter activity	molecular_function	4	35266	4	98659	0	0	2.79757	NM_001145265.1(SLC35C1);NM_001145266.1(SLC35C1);NM_018389.4(SLC35C1);NM_032826.4(SLC35B4);
GO:0015783	GDP-fucose transport	biological_process	4	35266	4	98659	0	0	2.79757	NM_001145265.1(SLC35C1);NM_001145266.1(SLC35C1);NM_018389.4(SLC35C1);NM_032826.4(SLC35B4);
GO:0060481	lobar bronchus epithelium development	biological_process	8	35266	8	98659	0	0	2.79757	NM_001145320.1(ADAMTSL2);NM_014694.3(ADAMTSL2);XM_005272237.2(ADAMTSL2);XM_005272238.2(ADAMTSL2);XM_005272239.2(ADAMTSL2);XM_006717337.2(ADAMTSL2);XM_011519241.1(ADAMTSL2);XM_011519242.1(ADAMTSL2);
GO:0021533	cell differentiation in hindbrain	biological_process	5	35266	5	98659	0	0	2.79757	NM_001145661.1(GATA2);NM_001145662.1(GATA2);NM_003924.3(PHOX2B);NM_005450.4(NOG);NM_032638.4(GATA2);
GO:0035854	eosinophil fate commitment	biological_process	6	35266	6	98659	0	0	2.79757	NM_001145661.1(GATA2);NM_001145662.1(GATA2);NM_002049.3(GATA1);NM_032638.4(GATA2);XM_011543897.1(GATA1);XM_011543898.1(GATA1);
GO:0060872	semicircular canal development	biological_process	3	35266	3	98659	0	0	2.79757	NM_001145661.1(GATA2);NM_001145662.1(GATA2);NM_032638.4(GATA2);
GO:2000977	regulation of forebrain neuron differentiation	biological_process	3	35266	3	98659	0	0	2.79757	NM_001145661.1(GATA2);NM_001145662.1(GATA2);NM_032638.4(GATA2);
GO:1903892	negative regulation of ATF6-mediated unfolded protein response	biological_process	2	35266	2	98659	0	0	2.79757	NM_001145853.1(WFS1);NM_006005.3(WFS1);
GO:1990705	cholangiocyte proliferation	biological_process	4	35266	4	98659	0	0	2.79757	NM_001145966.1(MKI67);NM_002417.4(MKI67);XM_006717864.2(MKI67);XM_011539818.1(MKI67);
GO:0021988	olfactory lobe development	biological_process	3	35266	3	98659	0	0	2.79757	NM_001146029.1(SEMA7A);NM_001146030.1(SEMA7A);NM_003612.3(SEMA7A);
GO:0044337	canonical Wnt signaling pathway involved in positive regulation of apoptotic process	biological_process	4	35266	4	98659	0	0	2.79757	NM_001146156.1(GSK3B);NM_002093.3(GSK3B);XM_006713610.1(GSK3B);XM_006713611.1(GSK3B);
GO:0071282	cellular response to iron(II) ion	biological_process	4	35266	4	98659	0	0	2.79757	NM_001146156.1(GSK3B);NM_002093.3(GSK3B);XM_006713610.1(GSK3B);XM_006713611.1(GSK3B);
GO:1990478	response to ultrasound	biological_process	4	35266	4	98659	0	0	2.79757	NM_001146156.1(GSK3B);NM_002093.3(GSK3B);XM_006713610.1(GSK3B);XM_006713611.1(GSK3B);
GO:1990776	response to angiotensin	biological_process	4	35266	4	98659	0	0	2.79757	NM_001146156.1(GSK3B);NM_002093.3(GSK3B);XM_006713610.1(GSK3B);XM_006713611.1(GSK3B);
GO:0033768	SUMO-targeted ubiquitin ligase complex	cellular_component	8	35266	8	98659	0	0	2.79757	NM_001146684.2(RNF222);NM_001185009.2(RNF4);NM_001185010.2(RNF4);NM_002938.4(RNF4);XM_011523978.1(RNF222);XM_011523979.1(RNF222);XM_011523980.1(RNF222);XM_011523981.1(RNF222);
GO:0019417	sulfur oxidation	biological_process	13	35266	13	98659	0	0	2.79757	NM_001159291.1(MICAL1);NM_001282663.1(MICAL2);NM_001282664.1(MICAL2);NM_001282665.1(MICAL2);NM_001282666.1(MICAL2);NM_001282667.1(MICAL2);NM_001282668.1(MICAL2);NM_001286613.1(MICAL1);NM_014632.3(MICAL2);NM_022765.3(MICAL1);XM_005253249.2(MICAL2);XM_011520490.1(MICAL2);XM_011520491.1(MICAL2);
GO:0050197	phytanate-CoA ligase activity	molecular_function	2	35266	2	98659	0	0	2.79757	NM_001159629.1(SLC27A2);NM_003645.3(SLC27A2);
GO:0070251	pristanate-CoA ligase activity	molecular_function	2	35266	2	98659	0	0	2.79757	NM_001159629.1(SLC27A2);NM_003645.3(SLC27A2);
GO:0004382	guanosine-diphosphatase activity	molecular_function	21	35266	21	98659	0	0	2.79757	NM_001159772.1(CANT1);NM_001159773.1(CANT1);NM_001249.2(ENTPD5);NM_138793.3(CANT1);XM_005257020.1(CANT1);XM_005257021.1(CANT1);XM_005257022.1(CANT1);XM_005268221.2(ENTPD5);XM_005268222.3(ENTPD5);XM_005268224.3(ENTPD5);XM_006720324.2(ENTPD5);XM_006720325.2(ENTPD5);XM_006720326.2(ENTPD5);XM_006721683.1(CANT1);XM_011524291.1(CANT1);XM_011524292.1(CANT1);XM_011524293.1(CANT1);XM_011524294.1(CANT1);XM…
GO:0060032	notochord regression	biological_process	14	35266	14	98659	0	0	2.79757	NM_001160045.1(GLI1);NM_001167609.1(GLI1);NM_005269.2(GLI1);NM_005270.4(GLI2);XM_005268799.2(GLI1);XM_006712422.1(GLI2);XM_011510969.1(GLI2);XM_011510970.1(GLI2);XM_011510971.1(GLI2);XM_011510972.1(GLI2);XM_011510973.1(GLI2);XM_011510974.1(GLI2);XM_011538189.1(GLI1);XM_011538190.1(GLI1);
GO:0002866	positive regulation of acute inflammatory response to antigenic stimulus	biological_process	12	35266	12	98659	0	0	2.79757	NM_001160226.1(CNR1);NM_001160258.1(CNR1);NM_001160259.1(CNR1);NM_016083.4(CNR1);NM_033181.3(CNR1);XM_005248650.3(CNR1);XM_006715330.2(CNR1);XM_011535424.1(CNR1);XM_011535425.1(CNR1);XM_011535426.1(CNR1);XM_011535427.1(CNR1);XM_011535428.1(CNR1);
GO:0004949	cannabinoid receptor activity	molecular_function	22	35266	22	98659	0	0	2.79757	NM_001160226.1(CNR1);NM_001160258.1(CNR1);NM_001160259.1(CNR1);NM_001841.2(CNR2);NM_005683.3(GPR55);NM_016083.4(CNR1);NM_033181.3(CNR1);XM_005245736.3(CNR2);XM_005246952.2(GPR55);XM_005248650.3(CNR1);XM_006715330.2(CNR1);XM_011512175.1(GPR55);XM_011512176.1(GPR55);XM_011512177.1(GPR55);XM_011535424.1(CNR1);XM_011535425.1(CNR1);XM_011535426.1(CNR1);XM_011535427.1(CNR1);XM_011535428.1(CNR1);XM_0115…
GO:0038171	cannabinoid signaling pathway	biological_process	22	35266	22	98659	0	0	2.79757	NM_001160226.1(CNR1);NM_001160258.1(CNR1);NM_001160259.1(CNR1);NM_001841.2(CNR2);NM_005683.3(GPR55);NM_016083.4(CNR1);NM_033181.3(CNR1);XM_005245736.3(CNR2);XM_005246952.2(GPR55);XM_005248650.3(CNR1);XM_006715330.2(CNR1);XM_011512175.1(GPR55);XM_011512176.1(GPR55);XM_011512177.1(GPR55);XM_011535424.1(CNR1);XM_011535425.1(CNR1);XM_011535426.1(CNR1);XM_011535427.1(CNR1);XM_011535428.1(CNR1);XM_0115…
GO:0060405	regulation of penile erection	biological_process	12	35266	12	98659	0	0	2.79757	NM_001160226.1(CNR1);NM_001160258.1(CNR1);NM_001160259.1(CNR1);NM_016083.4(CNR1);NM_033181.3(CNR1);XM_005248650.3(CNR1);XM_006715330.2(CNR1);XM_011535424.1(CNR1);XM_011535425.1(CNR1);XM_011535426.1(CNR1);XM_011535427.1(CNR1);XM_011535428.1(CNR1);
GO:0016191	synaptic vesicle uncoating	biological_process	4	35266	4	98659	0	0	2.79757	NM_001160302.1(SYNJ1);NM_001160306.1(SYNJ1);NM_003895.3(SYNJ1);NM_203446.2(SYNJ1);
GO:1904980	positive regulation of endosome organization	biological_process	4	35266	4	98659	0	0	2.79757	NM_001160302.1(SYNJ1);NM_001160306.1(SYNJ1);NM_003895.3(SYNJ1);NM_203446.2(SYNJ1);
GO:0061548	ganglion development	biological_process	2	35266	2	98659	0	0	2.79757	NM_001160408.1(TULP3);NM_003324.4(TULP3);
GO:0010610	regulation of mRNA stability involved in response to stress	biological_process	4	35266	4	98659	0	0	2.79757	NM_001160423.1(IGF2BP1);NM_006546.3(IGF2BP1);XM_005256955.2(IGF2BP1);XM_011524201.1(IGF2BP1);
GO:0022013	pallium cell proliferation in forebrain	biological_process	4	35266	4	98659	0	0	2.79757	NM_001160423.1(IGF2BP1);NM_006546.3(IGF2BP1);XM_005256955.2(IGF2BP1);XM_011524201.1(IGF2BP1);
GO:0045103	intermediate filament-based process	biological_process	2	35266	2	98659	0	0	2.79757	NM_001161708.1(SYNC);NM_030786.2(SYNC);
GO:0016603	glutaminyl-peptide cyclotransferase activity	molecular_function	5	35266	5	98659	0	0	2.79757	NM_001163377.1(QPCTL);NM_012413.3(QPCT);NM_017659.3(QPCTL);XM_011527047.1(QPCTL);XM_011527048.1(QPCTL);
GO:0017186	peptidyl-pyroglutamic acid biosynthetic process, using glutaminyl-peptide cyclotransferase	biological_process	5	35266	5	98659	0	0	2.79757	NM_001163377.1(QPCTL);NM_012413.3(QPCT);NM_017659.3(QPCTL);XM_011527047.1(QPCTL);XM_011527048.1(QPCTL);
GO:0003209	cardiac atrium morphogenesis	biological_process	28	35266	28	98659	0	0	2.79757	NM_001163678.1(SHOX2);NM_003030.4(SHOX2);NM_005633.3(SOS1);NM_006884.3(SHOX2);NM_017617.3(NOTCH1);NM_019074.3(DLL4);NM_020733.1(HEG1);NM_080625.3(CCM2L);XM_005247666.1(HEG1);XM_005264515.3(SOS1);XM_006713727.2(SHOX2);XM_006713728.2(SHOX2);XM_006713729.2(SHOX2);XM_006723706.2(CCM2L);XM_011513076.1(SHOX2);XM_011513077.1(SHOX2);XM_011518717.1(NOTCH1);XM_011528566.1(CCM2L);XM_011528567.1(CCM2L);XM_01…
GO:0004084	branched-chain-amino-acid transaminase activity	molecular_function	9	35266	9	98659	0	0	2.79757	NM_001164773.1(BCAT2);NM_001178091.1(BCAT1);NM_001178092.1(BCAT1);NM_001178093.1(BCAT1);NM_001178094.1(BCAT1);NM_001190.3(BCAT2);NM_001284325.1(BCAT2);NM_005504.6(BCAT1);XM_011520810.1(BCAT1);
GO:0009082	branched-chain amino acid biosynthetic process	biological_process	9	35266	9	98659	0	0	2.79757	NM_001164773.1(BCAT2);NM_001178091.1(BCAT1);NM_001178092.1(BCAT1);NM_001178093.1(BCAT1);NM_001178094.1(BCAT1);NM_001190.3(BCAT2);NM_001284325.1(BCAT2);NM_005504.6(BCAT1);XM_011520810.1(BCAT1);
GO:0052654	L-leucine transaminase activity	molecular_function	9	35266	9	98659	0	0	2.79757	NM_001164773.1(BCAT2);NM_001178091.1(BCAT1);NM_001178092.1(BCAT1);NM_001178093.1(BCAT1);NM_001178094.1(BCAT1);NM_001190.3(BCAT2);NM_001284325.1(BCAT2);NM_005504.6(BCAT1);XM_011520810.1(BCAT1);
GO:0052655	L-valine transaminase activity	molecular_function	9	35266	9	98659	0	0	2.79757	NM_001164773.1(BCAT2);NM_001178091.1(BCAT1);NM_001178092.1(BCAT1);NM_001178093.1(BCAT1);NM_001178094.1(BCAT1);NM_001190.3(BCAT2);NM_001284325.1(BCAT2);NM_005504.6(BCAT1);XM_011520810.1(BCAT1);
GO:0052656	L-isoleucine transaminase activity	molecular_function	9	35266	9	98659	0	0	2.79757	NM_001164773.1(BCAT2);NM_001178091.1(BCAT1);NM_001178092.1(BCAT1);NM_001178093.1(BCAT1);NM_001178094.1(BCAT1);NM_001190.3(BCAT2);NM_001284325.1(BCAT2);NM_005504.6(BCAT1);XM_011520810.1(BCAT1);
GO:0015367	oxoglutarate:malate antiporter activity	molecular_function	3	35266	3	98659	0	0	2.79757	NM_001165417.1(SLC25A11);NM_001165418.1(SLC25A11);NM_003562.4(SLC25A11);
GO:0030656	regulation of vitamin metabolic process	biological_process	2	35266	2	98659	0	0	2.79757	NM_001165895.1(CD320);NM_016579.3(CD320);
GO:0021885	forebrain cell migration	biological_process	8	35266	8	98659	0	0	2.79757	NM_001165924.1(EMX2);NM_001278599.1(AXL);NM_001699.5(AXL);NM_004098.3(EMX2);NM_006293.3(TYRO3);NM_021913.4(AXL);XM_011521992.1(TYRO3);XM_011521993.1(TYRO3);
GO:0016011	dystroglycan complex	cellular_component	13	35266	13	98659	0	0	2.79757	NM_001165928.3(DAG1);NM_001177634.2(DAG1);NM_001177635.2(DAG1);NM_001177636.2(DAG1);NM_001177637.2(DAG1);NM_001177638.2(DAG1);NM_001177639.2(DAG1);NM_001177640.2(DAG1);NM_001177641.2(DAG1);NM_001177642.2(DAG1);NM_001177643.2(DAG1);NM_001177644.2(DAG1);NM_004393.5(DAG1);
GO:0021682	nerve maturation	biological_process	13	35266	13	98659	0	0	2.79757	NM_001165928.3(DAG1);NM_001177634.2(DAG1);NM_001177635.2(DAG1);NM_001177636.2(DAG1);NM_001177637.2(DAG1);NM_001177638.2(DAG1);NM_001177639.2(DAG1);NM_001177640.2(DAG1);NM_001177641.2(DAG1);NM_001177642.2(DAG1);NM_001177643.2(DAG1);NM_001177644.2(DAG1);NM_004393.5(DAG1);
GO:0016153	urocanate hydratase activity	molecular_function	2	35266	2	98659	0	0	2.79757	NM_001165974.1(UROC1);NM_144639.2(UROC1);
GO:0071914	prominosome	cellular_component	7	35266	7	98659	0	0	2.79757	NM_001165977.1(PROM2);NM_001165978.1(PROM2);NM_144707.2(PROM2);XM_005263880.3(PROM2);XM_005263881.3(PROM2);XM_006712301.2(PROM2);XM_011510672.1(PROM2);
GO:0035499	carnosine biosynthetic process	biological_process	5	35266	5	98659	0	0	2.79757	NM_001166222.1(CARNS1);NM_020811.1(CARNS1);XM_011545189.1(CARNS1);XM_011545190.1(CARNS1);XM_011545191.1(CARNS1);
GO:0047730	carnosine synthase activity	molecular_function	5	35266	5	98659	0	0	2.79757	NM_001166222.1(CARNS1);NM_020811.1(CARNS1);XM_011545189.1(CARNS1);XM_011545190.1(CARNS1);XM_011545191.1(CARNS1);
GO:0060229	lipase activator activity	molecular_function	2	35266	2	98659	0	0	2.79757	NM_001166598.1(APOA5);NM_052968.4(APOA5);
GO:0070325	lipoprotein particle receptor binding	molecular_function	5	35266	5	98659	0	0	2.79757	NM_001166598.1(APOA5);NM_002332.2(LRP1);NM_005045.3(RELN);NM_052968.4(APOA5);NM_173054.2(RELN);
GO:0019866	organelle inner membrane	cellular_component	5	35266	5	98659	0	0	2.79757	NM_001167599.2(NEU4);NM_001167600.2(NEU4);NM_001167601.2(NEU4);NM_001167602.2(NEU4);NM_080741.3(NEU4);
GO:0060537	muscle tissue development	biological_process	3	35266	3	98659	0	0	2.79757	NM_001170760.1(SRPK3);NM_001170761.1(SRPK3);NM_014370.3(SRPK3);
GO:0047394	glycerophosphoinositol inositolphosphodiesterase activity	molecular_function	5	35266	5	98659	0	0	2.79757	NM_001171191.1(GDPD2);NM_001171192.1(GDPD2);NM_001171193.1(GDPD2);NM_017711.3(GDPD2);XM_011530977.1(GDPD2);
GO:0008890	glycine C-acetyltransferase activity	molecular_function	7	35266	7	98659	0	0	2.79757	NM_001171690.1(GCAT);NM_014291.3(GCAT);XM_005261409.3(GCAT);XM_005261410.3(GCAT);XM_005261411.1(GCAT);XM_006724172.2(GCAT);XM_011530023.1(GCAT);
GO:0003868	4-hydroxyphenylpyruvate dioxygenase activity	molecular_function	3	35266	3	98659	0	0	2.79757	NM_001171993.1(HPD);NM_002150.2(HPD);NM_032756.2(HPDL);
GO:0002758	innate immune response-activating signal transduction	biological_process	6	35266	6	98659	0	0	2.79757	NM_001172129.1(HCK);NM_001172130.1(HCK);NM_001172131.1(HCK);NM_001172132.1(HCK);NM_001172133.1(HCK);NM_002110.3(HCK);
GO:0043299	leukocyte degranulation	biological_process	6	35266	6	98659	0	0	2.79757	NM_001172129.1(HCK);NM_001172130.1(HCK);NM_001172131.1(HCK);NM_001172132.1(HCK);NM_001172133.1(HCK);NM_002110.3(HCK);
GO:0045728	respiratory burst after phagocytosis	biological_process	6	35266	6	98659	0	0	2.79757	NM_001172129.1(HCK);NM_001172130.1(HCK);NM_001172131.1(HCK);NM_001172132.1(HCK);NM_001172133.1(HCK);NM_002110.3(HCK);
GO:0051638	barbed-end actin filament uncapping	biological_process	9	35266	9	98659	0	0	2.79757	NM_001173977.1(LRRC16A);NM_017640.5(LRRC16A);XM_005249218.1(LRRC16A);XM_011514732.1(LRRC16A);XM_011514733.1(LRRC16A);XM_011514734.1(LRRC16A);XM_011514735.1(LRRC16A);XM_011514736.1(LRRC16A);XM_011514737.1(LRRC16A);
GO:0048792	spontaneous exocytosis of neurotransmitter	biological_process	6	35266	6	98659	0	0	2.79757	NM_001177880.1(SYT12);NM_177963.3(SYT12);XM_006718737.2(SYT12);XM_011545346.1(SYT12);XM_011545347.1(SYT12);XM_011545348.1(SYT12);
GO:0016860	intramolecular oxidoreductase activity	molecular_function	2	35266	2	98659	0	0	2.79757	NM_001178029.1(ECI1);NM_001919.3(ECI1);
GO:2000465	regulation of glycogen (starch) synthase activity	biological_process	3	35266	3	98659	0	0	2.79757	NM_001184745.1(PPP1R3F);NM_033215.4(PPP1R3F);XM_005272687.2(PPP1R3F);
GO:0004306	ethanolamine-phosphate cytidylyltransferase activity	molecular_function	11	35266	11	98659	0	0	2.79757	NM_001184917.2(PCYT2);NM_001256433.2(PCYT2);NM_001256434.2(PCYT2);NM_001256435.2(PCYT2);NM_001282203.1(PCYT2);NM_001282204.1(PCYT2);NM_002861.4(PCYT2);XM_005256386.2(PCYT2);XM_005256387.2(PCYT2);XM_006722287.2(PCYT2);XM_011523586.1(PCYT2);
GO:0014876	response to injury involved in regulation of muscle adaptation	biological_process	14	35266	14	98659	0	0	2.79757	NM_001185057.2(NOL3);NM_001276307.1(NOL3);NM_001276309.1(NOL3);NM_001276311.1(NOL3);NM_001276312.1(NOL3);NM_001276319.1(NOL3);NM_003946.6(NOL3);XM_005256217.1(NOL3);XM_005256219.2(NOL3);XM_006721322.2(NOL3);XM_006721323.2(NOL3);XM_011523424.1(NOL3);XM_011523425.1(NOL3);XM_011523426.1(NOL3);
GO:0008903	hydroxypyruvate isomerase activity	molecular_function	9	35266	9	98659	0	0	2.79757	NM_001190880.2(HYI);NM_001243526.1(HYI);NM_031207.5(HYI);XM_005271239.3(HYI);XM_005271240.3(HYI);XM_006710937.2(HYI);XM_011542222.1(HYI);XM_011542223.1(HYI);XM_011542224.1(HYI);
GO:0002153	steroid receptor RNA activator RNA binding	molecular_function	4	35266	4	98659	0	0	2.79757	NM_001190918.1(THRA);NM_001190919.1(THRA);NM_003250.5(THRA);NM_199334.3(THRA);
GO:2000143	negative regulation of DNA-templated transcription, initiation	biological_process	4	35266	4	98659	0	0	2.79757	NM_001190918.1(THRA);NM_001190919.1(THRA);NM_003250.5(THRA);NM_199334.3(THRA);
GO:0040030	regulation of molecular function, epigenetic	biological_process	9	35266	9	98659	0	0	2.79757	NM_001191022.1(CTCF);NM_001672.2(ASIP);NM_006565.3(CTCF);XM_005255775.2(CTCF);XM_005260412.2(ASIP);XM_011528820.1(ASIP);XM_011528821.1(ASIP);XM_011528822.1(ASIP);XM_011528823.1(ASIP);
GO:0043035	chromatin insulator sequence binding	molecular_function	3	35266	3	98659	0	0	2.79757	NM_001191022.1(CTCF);NM_006565.3(CTCF);XM_005255775.2(CTCF);
GO:0046851	negative regulation of bone remodeling	biological_process	7	35266	7	98659	0	0	2.79757	NM_001191322.1(GREM1);NM_001191323.1(GREM1);NM_003012.4(SFRP1);NM_013372.6(GREM1);XM_005254301.1(GREM1);XM_006725542.1(GREM1);XM_011548909.1(GREM1);
GO:0090291	negative regulation of osteoclast proliferation	biological_process	13	35266	13	98659	0	0	2.79757	NM_001191322.1(GREM1);NM_001191323.1(GREM1);NM_001270507.1(TNFAIP3);NM_001270508.1(TNFAIP3);NM_006290.3(TNFAIP3);NM_013372.6(GREM1);XM_005254301.1(GREM1);XM_005267119.1(TNFAIP3);XM_006715555.1(TNFAIP3);XM_006725542.1(GREM1);XM_011536095.1(TNFAIP3);XM_011536096.1(TNFAIP3);XM_011548909.1(GREM1);
GO:1900155	negative regulation of bone trabecula formation	biological_process	8	35266	8	98659	0	0	2.79757	NM_001191322.1(GREM1);NM_001191323.1(GREM1);NM_001267.2(CHAD);NM_013372.6(GREM1);XM_005254301.1(GREM1);XM_006725542.1(GREM1);XM_011524214.1(CHAD);XM_011548909.1(GREM1);
GO:1900158	negative regulation of bone mineralization involved in bone maturation	biological_process	9	35266	9	98659	0	0	2.79757	NM_001191322.1(GREM1);NM_001191323.1(GREM1);NM_001204299.1(ZNF664-FAM101A);NM_013372.6(GREM1);NM_181709.4(FAM101A);NM_182705.2(FAM101B);XM_005254301.1(GREM1);XM_006725542.1(GREM1);XM_011548909.1(GREM1);
GO:0003247	post-embryonic cardiac muscle cell growth involved in heart morphogenesis	biological_process	5	35266	5	98659	0	0	2.79757	NM_001193285.1(SIRT6);NM_016539.2(SIRT6);XM_005259574.1(SIRT6);XM_005259575.1(SIRT6);XM_005259577.3(SIRT6);
GO:0005724	nuclear telomeric heterochromatin	cellular_component	9	35266	9	98659	0	0	2.79757	NM_001193285.1(SIRT6);NM_016539.2(SIRT6);NM_033396.2(TNKS1BP1);XM_005259574.1(SIRT6);XM_005259575.1(SIRT6);XM_005259577.3(SIRT6);XM_006718725.2(TNKS1BP1);XM_006718726.2(TNKS1BP1);XM_011545325.1(TNKS1BP1);
GO:0031074	nucleocytoplasmic shuttling complex	cellular_component	5	35266	5	98659	0	0	2.79757	NM_001193357.1(NUP62);NM_012346.4(NUP62);NM_016553.4(NUP62);NM_153718.3(NUP62);NM_153719.3(NUP62);
GO:0016073	snRNA metabolic process	biological_process	5	35266	5	98659	0	0	2.79757	NM_001194990.1(MEPCE);NM_001194991.1(MEPCE);NM_001194992.1(MEPCE);NM_019606.5(MEPCE);XM_011516410.1(MEPCE);
GO:0040031	snRNA modification	biological_process	5	35266	5	98659	0	0	2.79757	NM_001194990.1(MEPCE);NM_001194991.1(MEPCE);NM_001194992.1(MEPCE);NM_019606.5(MEPCE);XM_011516410.1(MEPCE);
GO:0042219	cellular modified amino acid catabolic process	biological_process	4	35266	4	98659	0	0	2.79757	NM_001195087.1(GGACT);NM_033110.2(GGACT);XM_005254083.1(GGACT);XM_011521129.1(GGACT);
GO:0006850	mitochondrial pyruvate transport	biological_process	2	35266	2	98659	0	0	2.79757	NM_001195522.2(MPC1L);XM_011543905.1(MPC1L);
GO:0033167	ARC complex	cellular_component	12	35266	12	98659	0	0	2.79757	NM_001195573.1(DICER1);NM_001271282.2(DICER1);NM_001291628.1(DICER1);NM_030621.4(DICER1);NM_177438.2(DICER1);XM_011536599.1(DICER1);XM_011536600.1(DICER1);XM_011536601.1(DICER1);XM_011536602.1(DICER1);XM_011536603.1(DICER1);XM_011536604.1(DICER1);XM_011536605.1(DICER1);
GO:0033168	conversion of ds siRNA to ss siRNA involved in RNA interference	biological_process	12	35266	12	98659	0	0	2.79757	NM_001195573.1(DICER1);NM_001271282.2(DICER1);NM_001291628.1(DICER1);NM_030621.4(DICER1);NM_177438.2(DICER1);XM_011536599.1(DICER1);XM_011536600.1(DICER1);XM_011536601.1(DICER1);XM_011536602.1(DICER1);XM_011536603.1(DICER1);XM_011536604.1(DICER1);XM_011536605.1(DICER1);
GO:0036404	conversion of ds siRNA to ss siRNA	biological_process	12	35266	12	98659	0	0	2.79757	NM_001195573.1(DICER1);NM_001271282.2(DICER1);NM_001291628.1(DICER1);NM_030621.4(DICER1);NM_177438.2(DICER1);XM_011536599.1(DICER1);XM_011536600.1(DICER1);XM_011536601.1(DICER1);XM_011536602.1(DICER1);XM_011536603.1(DICER1);XM_011536604.1(DICER1);XM_011536605.1(DICER1);
GO:0044648	histone H3-K4 dimethylation	biological_process	8	35266	8	98659	0	0	2.79757	NM_001197104.1(KMT2A);NM_005933.3(KMT2A);XM_006718839.2(KMT2A);XM_011542829.1(KMT2A);XM_011542830.1(KMT2A);XM_011542831.1(KMT2A);XM_011542832.1(KMT2A);XM_011542833.1(KMT2A);
GO:0071440	regulation of histone H3-K14 acetylation	biological_process	8	35266	8	98659	0	0	2.79757	NM_001197104.1(KMT2A);NM_005933.3(KMT2A);XM_006718839.2(KMT2A);XM_011542829.1(KMT2A);XM_011542830.1(KMT2A);XM_011542831.1(KMT2A);XM_011542832.1(KMT2A);XM_011542833.1(KMT2A);
GO:1901674	regulation of histone H3-K27 acetylation	biological_process	8	35266	8	98659	0	0	2.79757	NM_001197104.1(KMT2A);NM_005933.3(KMT2A);XM_006718839.2(KMT2A);XM_011542829.1(KMT2A);XM_011542830.1(KMT2A);XM_011542831.1(KMT2A);XM_011542832.1(KMT2A);XM_011542833.1(KMT2A);
GO:2001040	positive regulation of cellular response to drug	biological_process	8	35266	8	98659	0	0	2.79757	NM_001197104.1(KMT2A);NM_005933.3(KMT2A);XM_006718839.2(KMT2A);XM_011542829.1(KMT2A);XM_011542830.1(KMT2A);XM_011542831.1(KMT2A);XM_011542832.1(KMT2A);XM_011542833.1(KMT2A);
GO:0010712	regulation of collagen metabolic process	biological_process	2	35266	2	98659	0	0	2.79757	NM_001198695.1(MFAP4);NM_002404.2(MFAP4);
GO:0030719	P granule organization	biological_process	8	35266	8	98659	0	0	2.79757	NM_001199085.1(TDRD5);NM_001199089.1(TDRD5);NM_001199091.1(TDRD5);NM_001199092.1(TDRD5);NM_173533.3(TDRD5);NM_178836.3(PLD6);XM_005244934.1(TDRD5);XM_005244935.3(TDRD5);
GO:1904292	regulation of ERAD pathway	biological_process	20	35266	20	98659	0	0	2.79757	NM_001199160.1(USP19);NM_001199161.1(USP19);NM_001199162.1(USP19);NM_006677.2(USP19);XM_005264823.1(USP19);XM_005264824.2(USP19);XM_005264825.1(USP19);XM_005264826.1(USP19);XM_005264827.1(USP19);XM_005264829.1(USP19);XM_005264830.1(USP19);XM_005264831.1(USP19);XM_006712946.1(USP19);XM_006712947.1(USP19);XM_006712948.1(USP19);XM_006712949.1(USP19);XM_006712950.1(USP19);XM_006712951.1(USP19);XM_006…
GO:0097453	mesaxon	cellular_component	3	35266	3	98659	0	0	2.79757	NM_001199216.1(MAG);NM_002361.3(MAG);NM_080600.2(MAG);
GO:0071020	post-spliceosomal complex	cellular_component	2	35266	2	98659	0	0	2.79757	NM_001199469.1(ISY1);NM_020701.3(ISY1);
GO:0031022	nuclear migration along microfilament	biological_process	26	35266	26	98659	0	0	2.79757	NM_001199579.1(SUN2);NM_001199580.1(SUN2);NM_015180.4(SYNE2);NM_015374.2(SUN2);NM_182910.2(SYNE2);NM_182913.2(SYNE2);NM_182914.2(SYNE2);XM_005267454.1(SYNE2);XM_005267456.1(SYNE2);XM_005267457.1(SYNE2);XM_005267458.1(SYNE2);XM_005267459.1(SYNE2);XM_006720084.2(SYNE2);XM_011530104.1(SUN2);XM_011530105.1(SUN2);XM_011536574.1(SYNE2);XM_011536575.1(SYNE2);XM_011536576.1(SYNE2);XM_011536577.1(SYNE2);X…
GO:0045586	regulation of gamma-delta T cell differentiation	biological_process	8	35266	8	98659	0	0	2.79757	NM_001199880.1(EGR3);NM_001199881.1(EGR3);NM_004430.2(EGR3);NM_005686.2(SOX13);XM_005245623.1(SOX13);XM_005273425.2(EGR3);XM_005273426.2(EGR3);XM_011544429.1(EGR3);
GO:0008747	N-acetylneuraminate lyase activity	molecular_function	5	35266	5	98659	0	0	2.79757	NM_001200050.1(NPL);NM_001200051.1(NPL);NM_001200052.1(NPL);NM_001200056.1(NPL);NM_030769.2(NPL);
GO:0043063	intercellular bridge organization	biological_process	9	35266	9	98659	0	0	2.79757	NM_001201457.1(TEX14);NM_031272.4(TEX14);NM_198393.3(TEX14);XM_011525028.1(TEX14);XM_011525029.1(TEX14);XM_011525030.1(TEX14);XM_011525031.1(TEX14);XM_011525032.1(TEX14);XM_011525033.1(TEX14);
GO:0010159	specification of organ position	biological_process	13	35266	13	98659	0	0	2.79757	NM_001202.3(BMP4);NM_005996.3(TBX3);NM_016569.3(TBX3);NM_030661.4(HOXA3);NM_130850.2(BMP4);NM_130851.2(BMP4);NM_153631.2(HOXA3);XM_005249730.2(HOXA3);XM_005249731.2(HOXA3);XM_005249732.3(HOXA3);XM_005268015.3(BMP4);XM_006715715.2(HOXA3);XM_011515343.1(HOXA3);
GO:0048392	intermediate mesodermal cell differentiation	biological_process	4	35266	4	98659	0	0	2.79757	NM_001202.3(BMP4);NM_130850.2(BMP4);NM_130851.2(BMP4);XM_005268015.3(BMP4);
GO:0055020	positive regulation of cardiac muscle fiber development	biological_process	4	35266	4	98659	0	0	2.79757	NM_001202.3(BMP4);NM_130850.2(BMP4);NM_130851.2(BMP4);XM_005268015.3(BMP4);
GO:0060433	bronchus development	biological_process	4	35266	4	98659	0	0	2.79757	NM_001202.3(BMP4);NM_130850.2(BMP4);NM_130851.2(BMP4);XM_005268015.3(BMP4);
GO:0060462	lung lobe development	biological_process	4	35266	4	98659	0	0	2.79757	NM_001202.3(BMP4);NM_130850.2(BMP4);NM_130851.2(BMP4);XM_005268015.3(BMP4);
GO:0060503	bud dilation involved in lung branching	biological_process	4	35266	4	98659	0	0	2.79757	NM_001202.3(BMP4);NM_130850.2(BMP4);NM_130851.2(BMP4);XM_005268015.3(BMP4);
GO:0060592	mammary gland formation	biological_process	4	35266	4	98659	0	0	2.79757	NM_001202.3(BMP4);NM_130850.2(BMP4);NM_130851.2(BMP4);XM_005268015.3(BMP4);
GO:0061047	positive regulation of branching involved in lung morphogenesis	biological_process	4	35266	4	98659	0	0	2.79757	NM_001202.3(BMP4);NM_130850.2(BMP4);NM_130851.2(BMP4);XM_005268015.3(BMP4);
GO:0061149	BMP signaling pathway involved in ureter morphogenesis	biological_process	4	35266	4	98659	0	0	2.79757	NM_001202.3(BMP4);NM_130850.2(BMP4);NM_130851.2(BMP4);XM_005268015.3(BMP4);
GO:0061151	BMP signaling pathway involved in renal system segmentation	biological_process	4	35266	4	98659	0	0	2.79757	NM_001202.3(BMP4);NM_130850.2(BMP4);NM_130851.2(BMP4);XM_005268015.3(BMP4);
GO:0061155	pulmonary artery endothelial tube morphogenesis	biological_process	4	35266	4	98659	0	0	2.79757	NM_001202.3(BMP4);NM_130850.2(BMP4);NM_130851.2(BMP4);XM_005268015.3(BMP4);
GO:0071893	BMP signaling pathway involved in nephric duct formation	biological_process	4	35266	4	98659	0	0	2.79757	NM_001202.3(BMP4);NM_130850.2(BMP4);NM_130851.2(BMP4);XM_005268015.3(BMP4);
GO:0072097	negative regulation of branch elongation involved in ureteric bud branching by BMP signaling pathway	biological_process	4	35266	4	98659	0	0	2.79757	NM_001202.3(BMP4);NM_130850.2(BMP4);NM_130851.2(BMP4);XM_005268015.3(BMP4);
GO:0072101	specification of ureteric bud anterior/posterior symmetry by BMP signaling pathway	biological_process	4	35266	4	98659	0	0	2.79757	NM_001202.3(BMP4);NM_130850.2(BMP4);NM_130851.2(BMP4);XM_005268015.3(BMP4);
GO:0072192	ureter epithelial cell differentiation	biological_process	4	35266	4	98659	0	0	2.79757	NM_001202.3(BMP4);NM_130850.2(BMP4);NM_130851.2(BMP4);XM_005268015.3(BMP4);
GO:0072198	mesenchymal cell proliferation involved in ureter development	biological_process	4	35266	4	98659	0	0	2.79757	NM_001202.3(BMP4);NM_130850.2(BMP4);NM_130851.2(BMP4);XM_005268015.3(BMP4);
GO:0072200	negative regulation of mesenchymal cell proliferation involved in ureter development	biological_process	4	35266	4	98659	0	0	2.79757	NM_001202.3(BMP4);NM_130850.2(BMP4);NM_130851.2(BMP4);XM_005268015.3(BMP4);
GO:0090194	negative regulation of glomerulus development	biological_process	4	35266	4	98659	0	0	2.79757	NM_001202.3(BMP4);NM_130850.2(BMP4);NM_130851.2(BMP4);XM_005268015.3(BMP4);
GO:1901341	positive regulation of store-operated calcium channel activity	biological_process	4	35266	4	98659	0	0	2.79757	NM_001202.3(BMP4);NM_130850.2(BMP4);NM_130851.2(BMP4);XM_005268015.3(BMP4);
GO:2000005	negative regulation of metanephric S-shaped body morphogenesis	biological_process	4	35266	4	98659	0	0	2.79757	NM_001202.3(BMP4);NM_130850.2(BMP4);NM_130851.2(BMP4);XM_005268015.3(BMP4);
GO:2000007	negative regulation of metanephric comma-shaped body morphogenesis	biological_process	4	35266	4	98659	0	0	2.79757	NM_001202.3(BMP4);NM_130850.2(BMP4);NM_130851.2(BMP4);XM_005268015.3(BMP4);
GO:2000137	negative regulation of cell proliferation involved in heart morphogenesis	biological_process	4	35266	4	98659	0	0	2.79757	NM_001202.3(BMP4);NM_130850.2(BMP4);NM_130851.2(BMP4);XM_005268015.3(BMP4);
GO:0061182	negative regulation of chondrocyte development	biological_process	3	35266	3	98659	0	0	2.79757	NM_001204299.1(ZNF664-FAM101A);NM_181709.4(FAM101A);NM_182705.2(FAM101B);
GO:0061572	actin filament bundle organization	biological_process	3	35266	3	98659	0	0	2.79757	NM_001204299.1(ZNF664-FAM101A);NM_181709.4(FAM101A);NM_182705.2(FAM101B);
GO:0030379	neurotensin receptor activity, non-G-protein coupled	molecular_function	6	35266	6	98659	0	0	2.79757	NM_001205228.1(SORT1);NM_002959.5(SORT1);XM_005271100.2(SORT1);XM_005271101.1(SORT1);XM_005271102.1(SORT1);XM_006710812.1(SORT1);
GO:0032509	endosome transport via multivesicular body sorting pathway	biological_process	9	35266	9	98659	0	0	2.79757	NM_001205228.1(SORT1);NM_002959.5(SORT1);NM_031430.2(RILP);XM_005256811.1(RILP);XM_005271100.2(SORT1);XM_005271101.1(SORT1);XM_005271102.1(SORT1);XM_006710812.1(SORT1);XM_006725257.1(RILP);
GO:0071387	cellular response to cortisol stimulus	biological_process	1	35266	1	98659	0	0	2.79757	NM_001206.2(KLF9);
GO:0021543	pallium development	biological_process	6	35266	6	98659	0	0	2.79757	NM_001206389.1(FGF8);NM_006119.4(FGF8);NM_033163.3(FGF8);NM_033164.3(FGF8);NM_033165.3(FGF8);XM_011539509.1(FGF8);
GO:0055026	negative regulation of cardiac muscle tissue development	biological_process	7	35266	7	98659	0	0	2.79757	NM_001206389.1(FGF8);NM_005247.2(FGF3);NM_006119.4(FGF8);NM_033163.3(FGF8);NM_033164.3(FGF8);NM_033165.3(FGF8);XM_011539509.1(FGF8);
GO:0090148	membrane fission	biological_process	12	35266	12	98659	0	0	2.79757	NM_001206651.1(SH3GLB1);NM_001206652.1(SH3GLB1);NM_001206653.1(SH3GLB1);NM_014946.3(SPAST);NM_016009.4(SH3GLB1);NM_176812.4(CHMP4B);NM_199436.1(SPAST);XM_005264516.3(SPAST);XM_006710672.2(SH3GLB1);XM_006710673.2(SH3GLB1);XM_011533067.1(SPAST);XM_011541538.1(SH3GLB1);
GO:1903778	protein localization to vacuolar membrane	biological_process	7	35266	7	98659	0	0	2.79757	NM_001206651.1(SH3GLB1);NM_001206652.1(SH3GLB1);NM_001206653.1(SH3GLB1);NM_016009.4(SH3GLB1);XM_006710672.2(SH3GLB1);XM_006710673.2(SH3GLB1);XM_011541538.1(SH3GLB1);
GO:0015578	mannose transmembrane transporter activity	molecular_function	4	35266	4	98659	0	0	2.79757	NM_001207024.1(M6PR);NM_002355.3(M6PR);XM_005253376.1(M6PR);XM_011520672.1(M6PR);
GO:0015761	mannose transport	biological_process	4	35266	4	98659	0	0	2.79757	NM_001207024.1(M6PR);NM_002355.3(M6PR);XM_005253376.1(M6PR);XM_011520672.1(M6PR);
GO:0002335	mature B cell differentiation	biological_process	10	35266	10	98659	0	0	2.79757	NM_001207025.2(POU2F2);NM_001207026.1(POU2F2);NM_001247994.1(POU2F2);NM_002698.4(POU2F2);XM_005259010.2(POU2F2);XM_011527040.1(POU2F2);XM_011527041.1(POU2F2);XM_011527042.1(POU2F2);XM_011527043.1(POU2F2);XM_011527044.1(POU2F2);
GO:0002380	immunoglobulin secretion involved in immune response	biological_process	10	35266	10	98659	0	0	2.79757	NM_001207025.2(POU2F2);NM_001207026.1(POU2F2);NM_001247994.1(POU2F2);NM_002698.4(POU2F2);XM_005259010.2(POU2F2);XM_011527040.1(POU2F2);XM_011527041.1(POU2F2);XM_011527042.1(POU2F2);XM_011527043.1(POU2F2);XM_011527044.1(POU2F2);
GO:1903754	cortical microtubule plus-end	cellular_component	33	35266	33	98659	0	0	2.79757	NM_001207044.1(CLASP2);NM_015097.2(CLASP2);XM_006713036.1(CLASP2);XM_006713040.1(CLASP2);XM_006713041.1(CLASP2);XM_006713042.1(CLASP2);XM_006713048.1(CLASP2);XM_006713049.1(CLASP2);XM_006713050.1(CLASP2);XM_006713052.1(CLASP2);XM_006713053.1(CLASP2);XM_006713056.1(CLASP2);XM_006713057.1(CLASP2);XM_006713058.1(CLASP2);XM_006713060.1(CLASP2);XM_011533505.1(CLASP2);XM_011533506.1(CLASP2);XM_01153350…
GO:0031690	adrenergic receptor binding	molecular_function	1	35266	1	98659	0	0	2.79757	NM_001212.3(C1QBP);
GO:0097177	mitochondrial ribosome binding	molecular_function	2	35266	2	98659	0	0	2.79757	NM_001212.3(C1QBP);NM_005015.3(OXA1L);
GO:0055064	chloride ion homeostasis	biological_process	3	35266	3	98659	0	0	2.79757	NM_001218.4(CA12);NM_001293642.1(CA12);NM_206925.2(CA12);
GO:1904646	cellular response to beta-amyloid	biological_process	3	35266	3	98659	0	0	2.79757	NM_001225.3(CASP4);NM_033306.2(CASP4);XM_011543019.1(CASP4);
GO:0098829	intestinal folate absorption	biological_process	2	35266	2	98659	0	0	2.79757	NM_001242366.2(SLC46A1);NM_080669.5(SLC46A1);
GO:1904447	folic acid import into cell	biological_process	2	35266	2	98659	0	0	2.79757	NM_001242366.2(SLC46A1);NM_080669.5(SLC46A1);
GO:0045556	positive regulation of TRAIL biosynthetic process	biological_process	6	35266	6	98659	0	0	2.79757	NM_001243.4(TNFRSF8);NM_001281430.2(TNFRSF8);XM_011542441.1(TNFRSF8);XM_011542442.1(TNFRSF8);XM_011542443.1(TNFRSF8);XM_011542444.1(TNFRSF8);
GO:0015421	oligopeptide-transporting ATPase activity	molecular_function	5	35266	5	98659	0	0	2.79757	NM_001243013.1(ABCB9);NM_001243014.1(ABCB9);NM_019624.3(ABCB9);NM_019625.3(ABCB9);NM_203444.3(ABCB9);
GO:0002094	polyprenyltransferase activity	molecular_function	16	35266	16	98659	0	0	2.79757	NM_001243564.1(DHDDS);NM_001243565.1(DHDDS);NM_024887.3(DHDDS);NM_205861.2(DHDDS);XM_006710912.1(DHDDS);XM_006710913.1(DHDDS);XM_006710914.1(DHDDS);XM_006710915.1(DHDDS);XM_006710916.1(DHDDS);XM_006710917.1(DHDDS);XM_006710918.1(DHDDS);XM_006710919.1(DHDDS);XM_011542183.1(DHDDS);XM_011542184.1(DHDDS);XM_011542185.1(DHDDS);XM_011542186.1(DHDDS);
GO:0035470	positive regulation of vascular wound healing	biological_process	3	35266	3	98659	0	0	2.79757	NM_001243733.1(VEGFB);NM_003377.4(VEGFB);NM_005251.2(FOXC2);
GO:0038024	cargo receptor activity	molecular_function	2	35266	2	98659	0	0	2.79757	NM_001244871.1(DAB2);NM_001343.3(DAB2);
GO:0009181	purine ribonucleoside diphosphate catabolic process	biological_process	4	35266	4	98659	0	0	2.79757	NM_001246.3(ENTPD2);NM_203468.2(ENTPD2);XM_011519211.1(ENTPD2);XM_011519212.1(ENTPD2);
GO:0100057	regulation of phenotypic switching by transcription from RNA polymerase II promoter	biological_process	4	35266	4	98659	0	0	2.79757	NM_001251825.1(SP1);NM_003109.1(SP1);NM_138473.2(SP1);XM_011538696.1(SP1);
GO:1904828	positive regulation of hydrogen sulfide biosynthetic process	biological_process	4	35266	4	98659	0	0	2.79757	NM_001251825.1(SP1);NM_003109.1(SP1);NM_138473.2(SP1);XM_011538696.1(SP1);
GO:0008446	GDP-mannose 4,6-dehydratase activity	molecular_function	11	35266	11	98659	0	0	2.79757	NM_001253846.1(GMDS);NM_001500.3(GMDS);XM_006715066.1(GMDS);XM_011514500.1(GMDS);XM_011514501.1(GMDS);XM_011514502.1(GMDS);XM_011514503.1(GMDS);XM_011514504.1(GMDS);XM_011514505.1(GMDS);XM_011514506.1(GMDS);XM_011514507.1(GMDS);
GO:0070401	NADP+ binding	molecular_function	11	35266	11	98659	0	0	2.79757	NM_001253846.1(GMDS);NM_001500.3(GMDS);XM_006715066.1(GMDS);XM_011514500.1(GMDS);XM_011514501.1(GMDS);XM_011514502.1(GMDS);XM_011514503.1(GMDS);XM_011514504.1(GMDS);XM_011514505.1(GMDS);XM_011514506.1(GMDS);XM_011514507.1(GMDS);
GO:0050746	regulation of lipoprotein metabolic process	biological_process	8	35266	8	98659	0	0	2.79757	NM_001253891.1(DGAT2);NM_006033.2(LIPG);NM_032564.4(DGAT2);XM_005258390.1(LIPG);XM_011526265.1(LIPG);XM_011526266.1(LIPG);XM_011526267.1(LIPG);XM_011545304.1(DGAT2);
GO:0086037	sodium:potassium-exchanging ATPase activity involved in regulation of cardiac muscle cell membrane potential	molecular_function	4	35266	4	98659	0	0	2.79757	NM_001256213.1(ATP1A3);NM_001256214.1(ATP1A3);NM_152296.4(ATP1A3);XM_011526991.1(ATP1A3);
GO:0001135	transcription factor activity, RNA polymerase II transcription factor recruiting	molecular_function	4	35266	4	98659	0	0	2.79757	NM_001257135.1(LIF);NM_002309.4(LIF);XM_006724240.2(LIF);XM_011530172.1(LIF);
GO:1901676	positive regulation of histone H3-K27 acetylation	biological_process	4	35266	4	98659	0	0	2.79757	NM_001257135.1(LIF);NM_002309.4(LIF);XM_006724240.2(LIF);XM_011530172.1(LIF);
GO:0048757	pigment granule maturation	biological_process	8	35266	8	98659	0	0	2.79757	NM_001257389.1(CD63);NM_001257390.1(CD63);NM_001257391.1(CD63);NM_001257392.1(CD63);NM_001257400.1(CD63);NM_001257401.1(CD63);NM_001267698.1(CD63);NM_001780.5(CD63);
GO:1900746	regulation of vascular endothelial growth factor signaling pathway	biological_process	33	35266	33	98659	0	0	2.79757	NM_001257389.1(CD63);NM_001257390.1(CD63);NM_001257391.1(CD63);NM_001257392.1(CD63);NM_001257400.1(CD63);NM_001257401.1(CD63);NM_001267698.1(CD63);NM_001780.5(CD63);NM_005618.3(DLL1);NM_007079.3(PTP4A3);NM_032611.2(PTP4A3);XM_005250762.2(PTP4A3);XM_005250763.1(PTP4A3);XM_005250764.2(PTP4A3);XM_005250766.3(PTP4A3);XM_005250767.3(PTP4A3);XM_005266934.2(DLL1);XM_006716499.1(PTP4A3);XM_006716500.1(PT…
GO:2000680	regulation of rubidium ion transport	biological_process	8	35266	8	98659	0	0	2.79757	NM_001257389.1(CD63);NM_001257390.1(CD63);NM_001257391.1(CD63);NM_001257392.1(CD63);NM_001257400.1(CD63);NM_001257401.1(CD63);NM_001267698.1(CD63);NM_001780.5(CD63);
GO:1904274	tricellular tight junction assembly	biological_process	8	35266	8	98659	0	0	2.79757	NM_001260489.1(LSR);NM_001260490.1(LSR);NM_015925.6(LSR);NM_205834.3(LSR);NM_205835.3(LSR);XM_005258980.1(LSR);XM_005258982.1(LSR);XM_011527026.1(LSR);
GO:0002196	Ser-tRNA(Ala) hydrolase activity	molecular_function	1	35266	1	98659	0	0	2.79757	NM_001261434.1(AARSD1);
GO:0004676	3-phosphoinositide-dependent protein kinase activity	molecular_function	8	35266	8	98659	0	0	2.79757	NM_001261816.1(PDPK1);NM_002613.4(PDPK1);NM_031268.5(PDPK1);XM_005255356.1(PDPK1);XM_011522521.1(PDPK1);XM_011522522.1(PDPK1);XM_011522523.1(PDPK1);XM_011522524.1(PDPK1);
GO:0048499	synaptic vesicle membrane organization	biological_process	6	35266	6	98659	0	0	2.79757	NM_001261826.1(AP3D1);NM_003179.2(SYP);NM_003938.6(AP3D1);XM_006722932.1(AP3D1);XM_011543950.1(SYP);XM_011543951.1(SYP);
GO:0044090	positive regulation of vacuole organization	biological_process	7	35266	7	98659	0	0	2.79757	NM_001267048.1(KIAA1324);NM_001284352.1(KIAA1324);NM_001284353.1(KIAA1324);NM_020775.4(KIAA1324);XM_011541825.1(KIAA1324);XM_011541826.1(KIAA1324);XM_011541827.1(KIAA1324);
GO:0000773	phosphatidyl-N-methylethanolamine N-methyltransferase activity	molecular_function	6	35266	6	98659	0	0	2.79757	NM_001267551.1(PEMT);NM_001267552.1(PEMT);NM_007169.2(PEMT);NM_148172.2(PEMT);NM_148173.1(PEMT);XM_006721418.2(PEMT);
GO:0004608	phosphatidylethanolamine N-methyltransferase activity	molecular_function	6	35266	6	98659	0	0	2.79757	NM_001267551.1(PEMT);NM_001267552.1(PEMT);NM_007169.2(PEMT);NM_148172.2(PEMT);NM_148173.1(PEMT);XM_006721418.2(PEMT);
GO:0050747	positive regulation of lipoprotein metabolic process	biological_process	6	35266	6	98659	0	0	2.79757	NM_001267551.1(PEMT);NM_001267552.1(PEMT);NM_007169.2(PEMT);NM_148172.2(PEMT);NM_148173.1(PEMT);XM_006721418.2(PEMT);
GO:0080101	phosphatidyl-N-dimethylethanolamine N-methyltransferase activity	molecular_function	6	35266	6	98659	0	0	2.79757	NM_001267551.1(PEMT);NM_001267552.1(PEMT);NM_007169.2(PEMT);NM_148172.2(PEMT);NM_148173.1(PEMT);XM_006721418.2(PEMT);
GO:0015377	cation:chloride symporter activity	molecular_function	9	35266	9	98659	0	0	2.79757	NM_001267812.1(SLC12A9);NM_001267814.1(SLC12A9);NM_020246.3(SLC12A9);XM_005250502.2(SLC12A9);XM_005250504.3(SLC12A9);XM_006716054.2(SLC12A9);XM_006716055.2(SLC12A9);XM_011516413.1(SLC12A9);XM_011516414.1(SLC12A9);
GO:0034148	negative regulation of toll-like receptor 5 signaling pathway	biological_process	7	35266	7	98659	0	0	2.79757	NM_001270507.1(TNFAIP3);NM_001270508.1(TNFAIP3);NM_006290.3(TNFAIP3);XM_005267119.1(TNFAIP3);XM_006715555.1(TNFAIP3);XM_011536095.1(TNFAIP3);XM_011536096.1(TNFAIP3);
GO:0061043	regulation of vascular wound healing	biological_process	7	35266	7	98659	0	0	2.79757	NM_001270507.1(TNFAIP3);NM_001270508.1(TNFAIP3);NM_006290.3(TNFAIP3);XM_005267119.1(TNFAIP3);XM_006715555.1(TNFAIP3);XM_011536095.1(TNFAIP3);XM_011536096.1(TNFAIP3);
GO:0070429	negative regulation of nucleotide-binding oligomerization domain containing 1 signaling pathway	biological_process	7	35266	7	98659	0	0	2.79757	NM_001270507.1(TNFAIP3);NM_001270508.1(TNFAIP3);NM_006290.3(TNFAIP3);XM_005267119.1(TNFAIP3);XM_006715555.1(TNFAIP3);XM_011536095.1(TNFAIP3);XM_011536096.1(TNFAIP3);
GO:0072666	establishment of protein localization to vacuole	biological_process	7	35266	7	98659	0	0	2.79757	NM_001270507.1(TNFAIP3);NM_001270508.1(TNFAIP3);NM_006290.3(TNFAIP3);XM_005267119.1(TNFAIP3);XM_006715555.1(TNFAIP3);XM_011536095.1(TNFAIP3);XM_011536096.1(TNFAIP3);
GO:1900169	regulation of glucocorticoid mediated signaling pathway	biological_process	3	35266	3	98659	0	0	2.79757	NM_001270546.1(AKAP13);NM_006738.5(AKAP13);NM_007200.4(AKAP13);
GO:0002194	hepatocyte cell migration	biological_process	8	35266	8	98659	0	0	2.79757	NM_001270616.1(PROX1);NM_002763.4(PROX1);XM_005273194.1(PROX1);XM_005273195.3(PROX1);XM_011509771.1(PROX1);XM_011509772.1(PROX1);XM_011509773.1(PROX1);XM_011509774.1(PROX1);
GO:0030910	olfactory placode formation	biological_process	20	35266	20	98659	0	0	2.79757	NM_001270616.1(PROX1);NM_002763.4(PROX1);NM_003502.3(AXIN1);NM_005982.3(SIX1);NM_017420.4(SIX4);NM_181050.2(AXIN1);XM_005267759.1(SIX4);XM_005273194.1(PROX1);XM_005273195.3(PROX1);XM_011509771.1(PROX1);XM_011509772.1(PROX1);XM_011509773.1(PROX1);XM_011509774.1(PROX1);XM_011522682.1(AXIN1);XM_011522683.1(AXIN1);XM_011522684.1(AXIN1);XM_011522685.1(AXIN1);XM_011522686.1(AXIN1);XM_011522687.1(AXIN1)…
GO:0050692	DBD domain binding	molecular_function	8	35266	8	98659	0	0	2.79757	NM_001270616.1(PROX1);NM_002763.4(PROX1);XM_005273194.1(PROX1);XM_005273195.3(PROX1);XM_011509771.1(PROX1);XM_011509772.1(PROX1);XM_011509773.1(PROX1);XM_011509774.1(PROX1);
GO:0061114	branching involved in pancreas morphogenesis	biological_process	8	35266	8	98659	0	0	2.79757	NM_001270616.1(PROX1);NM_002763.4(PROX1);XM_005273194.1(PROX1);XM_005273195.3(PROX1);XM_011509771.1(PROX1);XM_011509772.1(PROX1);XM_011509773.1(PROX1);XM_011509774.1(PROX1);
GO:0090425	acinar cell differentiation	biological_process	8	35266	8	98659	0	0	2.79757	NM_001270616.1(PROX1);NM_002763.4(PROX1);XM_005273194.1(PROX1);XM_005273195.3(PROX1);XM_011509771.1(PROX1);XM_011509772.1(PROX1);XM_011509773.1(PROX1);XM_011509774.1(PROX1);
GO:1901978	positive regulation of cell cycle checkpoint	biological_process	8	35266	8	98659	0	0	2.79757	NM_001270616.1(PROX1);NM_002763.4(PROX1);XM_005273194.1(PROX1);XM_005273195.3(PROX1);XM_011509771.1(PROX1);XM_011509772.1(PROX1);XM_011509773.1(PROX1);XM_011509774.1(PROX1);
GO:2000979	positive regulation of forebrain neuron differentiation	biological_process	8	35266	8	98659	0	0	2.79757	NM_001270616.1(PROX1);NM_002763.4(PROX1);XM_005273194.1(PROX1);XM_005273195.3(PROX1);XM_011509771.1(PROX1);XM_011509772.1(PROX1);XM_011509773.1(PROX1);XM_011509774.1(PROX1);
GO:0005310	dicarboxylic acid transmembrane transporter activity	molecular_function	3	35266	3	98659	0	0	2.79757	NM_001270888.1(SLC25A10);NM_001270953.1(SLC25A10);NM_012140.4(SLC25A10);
GO:0090024	negative regulation of neutrophil chemotaxis	biological_process	12	35266	12	98659	0	0	2.79757	NM_001271749.1(C5AR2);NM_001271750.1(C5AR2);NM_001289135.1(SLIT2);NM_001289136.1(SLIT2);NM_004787.2(SLIT2);NM_018485.2(C5AR2);XM_005248211.2(SLIT2);XM_006713986.2(SLIT2);XM_011513909.1(SLIT2);XM_011513910.1(SLIT2);XM_011526736.1(C5AR2);XM_011526737.1(C5AR2);
GO:1990451	cellular stress response to acidic pH	biological_process	3	35266	3	98659	0	0	2.79757	NM_001271815.1(NOX1);NM_007052.4(NOX1);NM_013955.2(NOX1);
GO:0055113	epiboly involved in gastrulation with mouth forming second	biological_process	2	35266	2	98659	0	0	2.79757	NM_001271938.1(MEGF8);NM_001410.2(MEGF8);
GO:0021834	chemorepulsion involved in embryonic olfactory bulb interneuron precursor migration	biological_process	10	35266	10	98659	0	0	2.79757	NM_001271946.1(SLIT3);NM_001289135.1(SLIT2);NM_001289136.1(SLIT2);NM_003061.2(SLIT1);NM_003062.3(SLIT3);NM_004787.2(SLIT2);XM_005248211.2(SLIT2);XM_006713986.2(SLIT2);XM_011513909.1(SLIT2);XM_011513910.1(SLIT2);
GO:0033604	negative regulation of catecholamine secretion	biological_process	4	35266	4	98659	0	0	2.79757	NM_001275.3(CHGA);NM_001301690.1(CHGA);XM_011536370.1(CHGA);XM_011546640.1(CHGA);
GO:0086030	adrenergic receptor signaling pathway involved in cardiac muscle relaxation	biological_process	4	35266	4	98659	0	0	2.79757	NM_001275.3(CHGA);NM_001301690.1(CHGA);XM_011536370.1(CHGA);XM_011546640.1(CHGA);
GO:0055082	cellular chemical homeostasis	biological_process	4	35266	4	98659	0	0	2.79757	NM_001276252.1(WDTC1);NM_015023.4(WDTC1);XM_011541057.1(WDTC1);XM_011541058.1(WDTC1);
GO:0048875	chemical homeostasis within a tissue	biological_process	3	35266	3	98659	0	0	2.79757	NM_001277077.1(HOMER1);NM_001277078.1(HOMER1);NM_004272.4(HOMER1);
GO:0045381	regulation of interleukin-18 biosynthetic process	biological_process	9	35266	9	98659	0	0	2.79757	NM_001277126.1(NLRP12);NM_001277129.1(NLRP12);NM_144687.3(NLRP12);XM_011527478.1(NLRP12);XM_011527479.1(NLRP12);XM_011527480.1(NLRP12);XM_011527481.1(NLRP12);XM_011527482.1(NLRP12);XM_011527483.1(NLRP12);
GO:0045751	negative regulation of Toll signaling pathway	biological_process	9	35266	9	98659	0	0	2.79757	NM_001277126.1(NLRP12);NM_001277129.1(NLRP12);NM_144687.3(NLRP12);XM_011527478.1(NLRP12);XM_011527479.1(NLRP12);XM_011527480.1(NLRP12);XM_011527481.1(NLRP12);XM_011527482.1(NLRP12);XM_011527483.1(NLRP12);
GO:2001037	positive regulation of tongue muscle cell differentiation	biological_process	9	35266	9	98659	0	0	2.79757	NM_001277742.1(CYP26B1);NM_005992.1(TBX1);NM_019885.3(CYP26B1);NM_080646.1(TBX1);NM_080647.1(TBX1);XM_005264433.3(CYP26B1);XM_006724312.1(TBX1);XM_011530351.1(TBX1);XM_011532988.1(CYP26B1);
GO:0019200	carbohydrate kinase activity	molecular_function	4	35266	4	98659	0	0	2.79757	NM_001277971.1(POMK);NM_032237.4(POMK);XM_011544668.1(POMK);XM_011544669.1(POMK);
GO:0030350	iron-responsive element binding	molecular_function	5	35266	5	98659	0	0	2.79757	NM_001278352.1(ACO1);NM_002197.2(ACO1);NM_004136.2(IREB2);XM_005251476.1(ACO1);XM_011517888.1(ACO1);
GO:0044228	host cell surface	cellular_component	3	35266	3	98659	0	0	2.79757	NM_001278599.1(AXL);NM_001699.5(AXL);NM_021913.4(AXL);
GO:1990264	peptidyl-tyrosine dephosphorylation involved in inactivation of protein kinase activity	biological_process	2	35266	2	98659	0	0	2.79757	NM_001278618.1(PTPN1);NM_002827.3(PTPN1);
GO:0048561	establishment of organ orientation	biological_process	5	35266	5	98659	0	0	2.79757	NM_001278632.1(IRX4);NM_001278633.1(IRX4);NM_001278634.1(IRX4);NM_001278635.1(IRX4);NM_016358.2(IRX4);
GO:0015786	UDP-glucose transport	biological_process	7	35266	7	98659	0	0	2.79757	NM_001281457.1(SLC35C2);NM_001281458.1(SLC35C2);NM_001281459.1(SLC35C2);NM_001281460.1(SLC35C2);NM_015945.11(SLC35C2);NM_173073.3(SLC35C2);NM_173179.3(SLC35C2);
GO:0045234	protein palmitoleylation	biological_process	13	35266	13	98659	0	0	2.79757	NM_001282167.1(PORCN);NM_022825.3(PORCN);NM_203473.2(PORCN);NM_203474.1(PORCN);NM_203475.2(PORCN);XM_005272635.1(PORCN);XM_005272636.1(PORCN);XM_005272637.1(PORCN);XM_006724544.2(PORCN);XM_006724545.2(PORCN);XM_006724546.2(PORCN);XM_006724547.1(PORCN);XM_011543948.1(PORCN);
GO:0071678	olfactory bulb axon guidance	biological_process	5	35266	5	98659	0	0	2.79757	NM_001282237.1(BCL11B);NM_001282238.1(BCL11B);NM_022898.2(BCL11B);NM_138576.3(BCL11B);XM_011537100.1(BCL11B);
GO:1900078	positive regulation of cellular response to insulin stimulus	biological_process	3	35266	3	98659	0	0	2.79757	NM_001282450.1(ESRRA);NM_001282451.1(ESRRA);NM_004451.4(ESRRA);
GO:0060857	establishment of glial blood-brain barrier	biological_process	5	35266	5	98659	0	0	2.79757	NM_001282582.1(MXRA8);NM_001282583.1(MXRA8);NM_001282584.1(MXRA8);NM_001282585.1(MXRA8);NM_032348.3(MXRA8);
GO:0047936	glucose 1-dehydrogenase [NAD(P)] activity	molecular_function	6	35266	6	98659	0	0	2.79757	NM_001282587.1(H6PD);NM_004285.3(H6PD);XM_005263539.3(H6PD);XM_005263540.3(H6PD);XM_006711052.2(H6PD);XM_011542446.1(H6PD);
GO:0043914	NADPH:sulfur oxidoreductase activity	molecular_function	10	35266	10	98659	0	0	2.79757	NM_001282663.1(MICAL2);NM_001282664.1(MICAL2);NM_001282665.1(MICAL2);NM_001282666.1(MICAL2);NM_001282667.1(MICAL2);NM_001282668.1(MICAL2);NM_014632.3(MICAL2);XM_005253249.2(MICAL2);XM_011520490.1(MICAL2);XM_011520491.1(MICAL2);
GO:0043247	telomere maintenance in response to DNA damage	biological_process	4	35266	4	98659	0	0	2.79757	NM_001283009.1(RTEL1);NM_001283010.1(RTEL1);NM_016434.3(RTEL1);NM_032957.4(RTEL1);
GO:0090657	telomeric loop disassembly	biological_process	4	35266	4	98659	0	0	2.79757	NM_001283009.1(RTEL1);NM_001283010.1(RTEL1);NM_016434.3(RTEL1);NM_032957.4(RTEL1);
GO:1904506	negative regulation of telomere maintenance in response to DNA damage	biological_process	4	35266	4	98659	0	0	2.79757	NM_001283009.1(RTEL1);NM_001283010.1(RTEL1);NM_016434.3(RTEL1);NM_032957.4(RTEL1);
GO:1904535	positive regulation of telomeric loop disassembly	biological_process	4	35266	4	98659	0	0	2.79757	NM_001283009.1(RTEL1);NM_001283010.1(RTEL1);NM_016434.3(RTEL1);NM_032957.4(RTEL1);
GO:1904744	positive regulation of telomeric DNA binding	biological_process	2	35266	2	98659	0	0	2.79757	NM_001284356.1(PINX1);NM_017884.5(PINX1);
GO:0001013	RNA polymerase I regulatory region DNA binding	molecular_function	4	35266	4	98659	0	0	2.79757	NM_001285829.1(CEBPA);NM_001287424.1(CEBPA);NM_001287435.1(CEBPA);NM_004364.4(CEBPA);
GO:0070586	cell-cell adhesion involved in gastrulation	biological_process	9	35266	9	98659	0	0	2.79757	NM_001286134.1(RIC8A);NM_021932.5(RIC8A);XM_005253052.2(RIC8A);XM_011520267.1(RIC8A);XM_011520268.1(RIC8A);XM_011520269.1(RIC8A);XM_011520270.1(RIC8A);XM_011520271.1(RIC8A);XM_011520272.1(RIC8A);
GO:0003881	CDP-diacylglycerol-inositol 3-phosphatidyltransferase activity	molecular_function	4	35266	4	98659	0	0	2.79757	NM_001286585.1(CDIPT);NM_001286586.1(CDIPT);NM_006319.4(CDIPT);XM_005255038.3(CDIPT);
GO:0046341	CDP-diacylglycerol metabolic process	biological_process	4	35266	4	98659	0	0	2.79757	NM_001286585.1(CDIPT);NM_001286586.1(CDIPT);NM_006319.4(CDIPT);XM_005255038.3(CDIPT);
GO:0000789	cytoplasmic chromatin	cellular_component	9	35266	9	98659	0	0	2.79757	NM_001286680.1(NPM2);NM_001286681.1(NPM2);NM_182795.1(NPM2);XM_011544359.1(NPM2);XM_011544360.1(NPM2);XM_011544361.1(NPM2);XM_011544362.1(NPM2);XM_011544363.1(NPM2);XM_011544364.1(NPM2);
GO:0047021	15-hydroxyprostaglandin dehydrogenase (NADP+) activity	molecular_function	2	35266	2	98659	0	0	2.79757	NM_001286789.1(CBR1);NM_001757.3(CBR1);
GO:0050221	prostaglandin-E2 9-reductase activity	molecular_function	2	35266	2	98659	0	0	2.79757	NM_001286789.1(CBR1);NM_001757.3(CBR1);
GO:0004516	nicotinate phosphoribosyltransferase activity	molecular_function	4	35266	4	98659	0	0	2.79757	NM_001286829.1(NAPRT);NM_145201.5(NAPRT);XM_011517377.1(NAPRT);XM_011546547.1(NAPRT);
GO:0019358	nicotinate nucleotide salvage	biological_process	4	35266	4	98659	0	0	2.79757	NM_001286829.1(NAPRT);NM_145201.5(NAPRT);XM_011517377.1(NAPRT);XM_011546547.1(NAPRT);
GO:0002689	negative regulation of leukocyte chemotaxis	biological_process	7	35266	7	98659	0	0	2.79757	NM_001289135.1(SLIT2);NM_001289136.1(SLIT2);NM_004787.2(SLIT2);XM_005248211.2(SLIT2);XM_006713986.2(SLIT2);XM_011513909.1(SLIT2);XM_011513910.1(SLIT2);
GO:0021972	corticospinal neuron axon guidance through spinal cord	biological_process	7	35266	7	98659	0	0	2.79757	NM_001289135.1(SLIT2);NM_001289136.1(SLIT2);NM_004787.2(SLIT2);XM_005248211.2(SLIT2);XM_006713986.2(SLIT2);XM_011513909.1(SLIT2);XM_011513910.1(SLIT2);
GO:0050929	induction of negative chemotaxis	biological_process	7	35266	7	98659	0	0	2.79757	NM_001289135.1(SLIT2);NM_001289136.1(SLIT2);NM_004787.2(SLIT2);XM_005248211.2(SLIT2);XM_006713986.2(SLIT2);XM_011513909.1(SLIT2);XM_011513910.1(SLIT2);
GO:0051058	negative regulation of small GTPase mediated signal transduction	biological_process	7	35266	7	98659	0	0	2.79757	NM_001289135.1(SLIT2);NM_001289136.1(SLIT2);NM_004787.2(SLIT2);XM_005248211.2(SLIT2);XM_006713986.2(SLIT2);XM_011513909.1(SLIT2);XM_011513910.1(SLIT2);
GO:0002429	immune response-activating cell surface receptor signaling pathway	biological_process	15	35266	15	98659	0	0	2.79757	NM_001289160.1(MICB);NM_001289161.1(MICB);NM_005931.4(MICB);XM_006726002.2(MICB);XM_006726095.2(MICB);XM_011514630.1(MICB);XM_011514631.1(MICB);XM_011546312.1(MICB);XM_011546313.1(MICB);XM_011547251.1(MICB);XM_011547252.1(MICB);XM_011547655.1(MICB);XM_011547656.1(MICB);XM_011548052.1(MICB);XM_011548053.1(MICB);
GO:0048611	embryonic ectodermal digestive tract development	biological_process	28	35266	28	98659	0	0	2.79757	NM_001289174.1(VPS52);NM_001289175.1(VPS52);NM_001289176.1(VPS52);NM_022553.5(VPS52);XM_011514797.1(VPS52);XM_011514798.1(VPS52);XM_011514799.1(VPS52);XM_011514800.1(VPS52);XM_011547270.1(VPS52);XM_011547271.1(VPS52);XM_011547272.1(VPS52);XM_011547273.1(VPS52);XM_011547673.1(VPS52);XM_011547674.1(VPS52);XM_011547675.1(VPS52);XM_011547676.1(VPS52);XM_011548072.1(VPS52);XM_011548073.1(VPS52);XM_011…
GO:0019082	viral protein processing	biological_process	3	35266	3	98659	0	0	2.79757	NM_001289823.1(FURIN);NM_001289824.1(FURIN);NM_002569.3(FURIN);
GO:0032902	nerve growth factor production	biological_process	10	35266	10	98659	0	0	2.79757	NM_001289823.1(FURIN);NM_001289824.1(FURIN);NM_001291309.1(PCSK6);NM_002569.3(FURIN);NM_002570.4(PCSK6);NM_138319.3(PCSK6);NM_138322.3(PCSK6);NM_138323.2(PCSK6);NM_138324.2(PCSK6);NM_138325.3(PCSK6);
GO:0032904	negative regulation of nerve growth factor production	biological_process	3	35266	3	98659	0	0	2.79757	NM_001289823.1(FURIN);NM_001289824.1(FURIN);NM_002569.3(FURIN);
GO:0043467	regulation of generation of precursor metabolites and energy	biological_process	1	35266	1	98659	0	0	2.79757	NM_001290079.1(NKX1-1);
GO:1902466	positive regulation of histone H3-K27 trimethylation	biological_process	6	35266	6	98659	0	0	2.79757	NM_001290318.1(ZNF304);NM_001290319.1(ZNF304);NM_020657.3(ZNF304);XM_011527144.1(ZNF304);XM_011527145.1(ZNF304);XM_011527146.1(ZNF304);
GO:0007354	zygotic determination of anterior/posterior axis, embryo	biological_process	7	35266	7	98659	0	0	2.79757	NM_001291309.1(PCSK6);NM_002570.4(PCSK6);NM_138319.3(PCSK6);NM_138322.3(PCSK6);NM_138323.2(PCSK6);NM_138324.2(PCSK6);NM_138325.3(PCSK6);
GO:0075521	microtubule-dependent intracellular transport of viral material towards nucleus	biological_process	3	35266	3	98659	0	0	2.79757	NM_001291602.1(DYNLT1);NM_001291603.1(DYNLT1);NM_006519.3(DYNLT1);
GO:0099503	secretory vesicle	cellular_component	4	35266	4	98659	0	0	2.79757	NM_001291602.1(DYNLT1);NM_001291603.1(DYNLT1);NM_004283.3(RAB3D);NM_006519.3(DYNLT1);
GO:2000193	positive regulation of fatty acid transport	biological_process	1	35266	1	98659	0	0	2.79757	NM_001291832.1(FAM132B);
GO:0023057	negative regulation of signaling	biological_process	4	35266	4	98659	0	0	2.79757	NM_001293204.1(MVP);NM_001293205.1(MVP);NM_005115.4(MVP);NM_017458.3(MVP);
GO:0035717	chemokine (C-C motif) ligand 7 binding	molecular_function	1	35266	1	98659	0	0	2.79757	NM_001295.2(CCR1);
GO:0000294	nuclear-transcribed mRNA catabolic process, endonucleolytic cleavage-dependent decay	biological_process	11	35266	11	98659	0	0	2.79757	NM_001297549.1(UPF1);NM_002911.3(UPF1);NM_025079.2(ZC3H12A);XM_006710925.2(ZC3H12A);XM_006710926.2(ZC3H12A);XM_011542193.1(ZC3H12A);XM_011542194.1(ZC3H12A);XM_011542195.1(ZC3H12A);XM_011542196.1(ZC3H12A);XM_011542197.1(ZC3H12A);XM_011542198.1(ZC3H12A);
GO:0032201	telomere maintenance via semi-conservative replication	biological_process	2	35266	2	98659	0	0	2.79757	NM_001297549.1(UPF1);NM_002911.3(UPF1);
GO:0008545	JUN kinase kinase activity	molecular_function	4	35266	4	98659	0	0	2.79757	NM_001297555.1(MAP2K7);NM_001297556.1(MAP2K7);NM_145185.3(MAP2K7);XM_006722800.2(MAP2K7);
GO:0021858	GABAergic neuron differentiation in basal ganglia	biological_process	2	35266	2	98659	0	0	2.79757	NM_001300781.1(HELT);NM_001300782.1(HELT);
GO:0060803	BMP signaling pathway involved in mesodermal cell fate specification	biological_process	6	35266	6	98659	0	0	2.79757	NM_001300974.1(ETV2);NM_001304549.1(ETV2);NM_014209.3(ETV2);XM_005258652.2(ETV2);XM_005258653.2(ETV2);XM_011526624.1(ETV2);
GO:0019061	uncoating of virus	biological_process	2	35266	2	98659	0	0	2.79757	NM_001300981.1(PPIA);NM_021130.4(PPIA);
GO:0004555	alpha,alpha-trehalase activity	molecular_function	3	35266	3	98659	0	0	2.79757	NM_001301065.1(TREH);NM_007180.2(TREH);XM_011542564.1(TREH);
GO:0005991	trehalose metabolic process	biological_process	3	35266	3	98659	0	0	2.79757	NM_001301065.1(TREH);NM_007180.2(TREH);XM_011542564.1(TREH);
GO:0005993	trehalose catabolic process	biological_process	3	35266	3	98659	0	0	2.79757	NM_001301065.1(TREH);NM_007180.2(TREH);XM_011542564.1(TREH);
GO:0097576	vacuole fusion	biological_process	6	35266	6	98659	0	0	2.79757	NM_001301138.1(VPS39);NM_015289.3(VPS39);XM_011521403.1(VPS39);XM_011521404.1(VPS39);XM_011521405.1(VPS39);XM_011521406.1(VPS39);
GO:0021568	rhombomere 2 development	biological_process	3	35266	3	98659	0	0	2.79757	NM_001301687.1(GBX2);NM_001485.3(GBX2);NM_006735.3(HOXA2);
GO:0048483	autonomic nervous system development	biological_process	4	35266	4	98659	0	0	2.79757	NM_001301687.1(GBX2);NM_001485.3(GBX2);NM_003924.3(PHOX2B);NM_015893.1(PRLH);
GO:1903452	positive regulation of G1 to G0 transition	biological_process	2	35266	2	98659	0	0	2.79757	NM_001303542.2(RAB11FIP4);NM_032932.5(RAB11FIP4);
GO:1902396	protein localization to bicellular tight junction	biological_process	6	35266	6	98659	0	0	2.79757	NM_001322033.1(ACTN4);NM_004924.4(ACTN4);NM_004924.5(ACTN4);XM_005259281.3(ACTN4);XM_005259282.3(ACTN4);XM_006723406.1(ACTN4);
GO:0043519	regulation of myosin II filament organization	biological_process	2	35266	2	98659	0	0	2.79757	NM_001348.2(DAPK3);XM_005259508.1(DAPK3);
GO:0047042	androsterone dehydrogenase (B-specific) activity	molecular_function	1	35266	1	98659	0	0	2.79757	NM_001353.5(AKR1C1);
GO:0004152	dihydroorotate dehydrogenase activity	molecular_function	4	35266	4	98659	0	0	2.79757	NM_001361.4(DHODH);XM_005255827.2(DHODH);XM_005255828.3(DHODH);XM_005255829.2(DHODH);
GO:0033798	thyroxine 5-deiodinase activity	molecular_function	1	35266	1	98659	0	0	2.79757	NM_001362.3(DIO3);
GO:0042404	thyroid hormone catabolic process	biological_process	1	35266	1	98659	0	0	2.79757	NM_001362.3(DIO3);
GO:0051293	establishment of spindle localization	biological_process	1	35266	1	98659	0	0	2.79757	NM_001376.4(DYNC1H1);
GO:0008330	protein tyrosine/threonine phosphatase activity	molecular_function	5	35266	5	98659	0	0	2.79757	NM_001394.6(DUSP4);NM_004417.3(DUSP1);NM_004418.3(DUSP2);NM_057158.3(DUSP4);XM_011544428.1(DUSP4);
GO:0021999	neural plate anterior/posterior regionalization	biological_process	2	35266	2	98659	0	0	2.79757	NM_001408.2(CELSR2);XM_005270580.3(CELSR2);
GO:0014737	positive regulation of muscle atrophy	biological_process	3	35266	3	98659	0	0	2.79757	NM_001429.3(EP300);NM_002479.5(MYOG);XM_006724165.2(EP300);
GO:0043969	histone H2B acetylation	biological_process	2	35266	2	98659	0	0	2.79757	NM_001429.3(EP300);XM_006724165.2(EP300);
GO:2000629	negative regulation of miRNA metabolic process	biological_process	2	35266	2	98659	0	0	2.79757	NM_001429.3(EP300);XM_006724165.2(EP300);
GO:0070054	mRNA splicing, via endonucleolytic cleavage and ligation	biological_process	1	35266	1	98659	0	0	2.79757	NM_001433.3(ERN1);
GO:0070055	mRNA endonucleolytic cleavage involved in unfolded protein response	biological_process	1	35266	1	98659	0	0	2.79757	NM_001433.3(ERN1);
GO:1990332	Ire1 complex	cellular_component	1	35266	1	98659	0	0	2.79757	NM_001433.3(ERN1);
GO:1990579	peptidyl-serine trans-autophosphorylation	biological_process	1	35266	1	98659	0	0	2.79757	NM_001433.3(ERN1);
GO:1990597	AIP1-IRE1 complex	cellular_component	22	35266	22	98659	0	0	2.79757	NM_001433.3(ERN1);NM_021138.3(TRAF2);NM_032552.3(DAB2IP);NM_138709.2(DAB2IP);XM_005251719.3(DAB2IP);XM_005251721.1(DAB2IP);XM_005251724.3(DAB2IP);XM_005266099.3(TRAF2);XM_011518264.1(DAB2IP);XM_011518265.1(DAB2IP);XM_011518266.1(DAB2IP);XM_011518267.1(DAB2IP);XM_011518268.1(DAB2IP);XM_011518269.1(DAB2IP);XM_011518270.1(DAB2IP);XM_011518271.1(DAB2IP);XM_011518973.1(TRAF2);XM_011518974.1(TRAF2);XM_…
GO:1990630	IRE1-RACK1-PP2A complex	cellular_component	1	35266	1	98659	0	0	2.79757	NM_001433.3(ERN1);
GO:0014822	detection of wounding	biological_process	1	35266	1	98659	0	0	2.79757	NM_001451.2(FOXF1);
GO:0048371	lateral mesodermal cell differentiation	biological_process	1	35266	1	98659	0	0	2.79757	NM_001451.2(FOXF1);
GO:0048613	embryonic ectodermal digestive tract morphogenesis	biological_process	1	35266	1	98659	0	0	2.79757	NM_001451.2(FOXF1);
GO:0060446	branching involved in open tracheal system development	biological_process	1	35266	1	98659	0	0	2.79757	NM_001451.2(FOXF1);
GO:0060461	right lung morphogenesis	biological_process	1	35266	1	98659	0	0	2.79757	NM_001451.2(FOXF1);
GO:1901534	positive regulation of hematopoietic progenitor cell differentiation	biological_process	1	35266	1	98659	0	0	2.79757	NM_001453.2(FOXC1);
GO:1902038	positive regulation of hematopoietic stem cell differentiation	biological_process	1	35266	1	98659	0	0	2.79757	NM_001453.2(FOXC1);
GO:1902257	negative regulation of apoptotic process involved in outflow tract morphogenesis	biological_process	2	35266	2	98659	0	0	2.79757	NM_001453.2(FOXC1);NM_005251.2(FOXC2);
GO:0002508	central tolerance induction	biological_process	1	35266	1	98659	0	0	2.79757	NM_001454.3(FOXJ1);
GO:0002897	positive regulation of central B cell tolerance induction	biological_process	1	35266	1	98659	0	0	2.79757	NM_001454.3(FOXJ1);
GO:0072016	glomerular parietal epithelial cell development	biological_process	1	35266	1	98659	0	0	2.79757	NM_001454.3(FOXJ1);
GO:1901248	positive regulation of lung ciliated cell differentiation	biological_process	1	35266	1	98659	0	0	2.79757	NM_001454.3(FOXJ1);
GO:0001544	initiation of primordial ovarian follicle growth	biological_process	8	35266	8	98659	0	0	2.79757	NM_001455.3(FOXO3);NM_201559.2(FOXO3);XM_005266867.3(FOXO3);XM_005266868.2(FOXO3);XM_011535626.1(FOXO3);XM_011535627.1(FOXO3);XM_011535628.1(FOXO3);XM_011535629.1(FOXO3);
GO:0003150	muscular septum morphogenesis	biological_process	10	35266	10	98659	0	0	2.79757	NM_001466.3(FZD2);NM_003505.1(FZD1);NM_012259.2(HEY2);NM_020335.2(VANGL2);XM_005245357.1(VANGL2);XM_005266878.2(HEY2);XM_011509804.1(VANGL2);XM_011509805.1(VANGL2);XM_011535649.1(HEY2);XM_011535650.1(HEY2);
GO:0035250	UDP-galactosyltransferase activity	molecular_function	3	35266	3	98659	0	0	2.79757	NM_001497.3(B4GALT1);NM_080605.3(B3GALT6);XM_005251440.3(B4GALT1);
GO:0016034	maleylacetoacetate isomerase activity	molecular_function	6	35266	6	98659	0	0	2.79757	NM_001513.3(GSTZ1);NM_145870.2(GSTZ1);NM_145871.2(GSTZ1);XM_005267559.2(GSTZ1);XM_011536670.1(GSTZ1);XM_011536671.1(GSTZ1);
GO:0002041	intussusceptive angiogenesis	biological_process	1	35266	1	98659	0	0	2.79757	NM_001554.4(CYR61);
GO:0019043	establishment of viral latency	biological_process	12	35266	12	98659	0	0	2.79757	NM_001572.3(IRF7);NM_004029.2(IRF7);NM_004031.2(IRF7);NM_006368.4(CREB3);XM_005252906.2(IRF7);XM_005252907.2(IRF7);XM_005252908.3(IRF7);XM_005252909.2(IRF7);XM_006725137.2(IRF7);XM_006725138.2(IRF7);XM_006725139.2(IRF7);XM_011520066.1(IRF7);
GO:0034127	regulation of MyD88-independent toll-like receptor signaling pathway	biological_process	11	35266	11	98659	0	0	2.79757	NM_001572.3(IRF7);NM_004029.2(IRF7);NM_004031.2(IRF7);XM_005252906.2(IRF7);XM_005252907.2(IRF7);XM_005252908.3(IRF7);XM_005252909.2(IRF7);XM_006725137.2(IRF7);XM_006725138.2(IRF7);XM_006725139.2(IRF7);XM_011520066.1(IRF7);
GO:0015112	nitrate transmembrane transporter activity	molecular_function	1	35266	1	98659	0	0	2.79757	NM_001652.3(AQP6);
GO:0015706	nitrate transport	biological_process	1	35266	1	98659	0	0	2.79757	NM_001652.3(AQP6);
GO:0005754	mitochondrial proton-transporting ATP synthase, catalytic core	cellular_component	1	35266	1	98659	0	0	2.79757	NM_001686.3(ATP5B);
GO:0050725	positive regulation of interleukin-1 beta biosynthetic process	biological_process	1	35266	1	98659	0	0	2.79757	NM_001700.3(AZU1);
GO:0050754	positive regulation of fractalkine biosynthetic process	biological_process	1	35266	1	98659	0	0	2.79757	NM_001700.3(AZU1);
GO:0070944	neutrophil mediated killing of bacterium	biological_process	1	35266	1	98659	0	0	2.79757	NM_001700.3(AZU1);
GO:0008655	pyrimidine-containing compound salvage	biological_process	1	35266	1	98659	0	0	2.79757	NM_001785.2(CDA);
GO:0045980	negative regulation of nucleotide metabolic process	biological_process	1	35266	1	98659	0	0	2.79757	NM_001785.2(CDA);
GO:0032773	positive regulation of monophenol monooxygenase activity	biological_process	2	35266	2	98659	0	0	2.79757	NM_001793.4(CDH3);XM_011522800.1(CDH3);
GO:0032912	negative regulation of transforming growth factor beta2 production	biological_process	3	35266	3	98659	0	0	2.79757	NM_001793.4(CDH3);NM_005257.5(GATA6);XM_011522800.1(CDH3);
GO:0051796	negative regulation of catagen	biological_process	2	35266	2	98659	0	0	2.79757	NM_001793.4(CDH3);XM_011522800.1(CDH3);
GO:0060901	regulation of hair cycle by canonical Wnt signaling pathway	biological_process	2	35266	2	98659	0	0	2.79757	NM_001793.4(CDH3);XM_011522800.1(CDH3);
GO:1902910	positive regulation of melanosome transport	biological_process	2	35266	2	98659	0	0	2.79757	NM_001793.4(CDH3);XM_011522800.1(CDH3);
GO:0046314	phosphocreatine biosynthetic process	biological_process	1	35266	1	98659	0	0	2.79757	NM_001824.4(CKM);
GO:0005585	collagen type II trimer	cellular_component	11	35266	11	98659	0	0	2.79757	NM_001844.4(COL2A1);NM_033150.2(COL2A1);XM_006719242.2(COL2A1);XM_011537928.1(COL2A1);XM_011537929.1(COL2A1);XM_011537930.1(COL2A1);XM_011537931.1(COL2A1);XM_011537932.1(COL2A1);XM_011537933.1(COL2A1);XM_011537934.1(COL2A1);XM_011537935.1(COL2A1);
GO:0005591	collagen type VIII trimer	cellular_component	2	35266	2	98659	0	0	2.79757	NM_001850.4(COL8A1);NM_020351.3(COL8A1);
GO:0015088	copper uptake transmembrane transporter activity	molecular_function	1	35266	1	98659	0	0	2.79757	NM_001859.3(SLC31A1);
GO:1902861	copper ion import into cell	biological_process	1	35266	1	98659	0	0	2.79757	NM_001859.3(SLC31A1);
GO:0047127	thiomorpholine-carboxylate dehydrogenase activity	molecular_function	2	35266	2	98659	0	0	2.79757	NM_001888.4(CRYM);XM_011545740.1(CRYM);
GO:0004742	dihydrolipoyllysine-residue acetyltransferase activity	molecular_function	2	35266	2	98659	0	0	2.79757	NM_001931.4(DLAT);XM_011542647.1(DLAT);
GO:0036343	psychomotor behavior	biological_process	2	35266	2	98659	0	0	2.79757	NM_001935.3(DPP4);XM_005246371.2(DPP4);
GO:0051545	negative regulation of elastin biosynthetic process	biological_process	1	35266	1	98659	0	0	2.79757	NM_001945.2(HBEGF);
GO:1904188	negative regulation of transformation of host cell by virus	biological_process	4	35266	4	98659	0	0	2.79757	NM_001996.3(FBLN1);NM_006485.3(FBLN1);NM_006486.2(FBLN1);NM_006487.2(FBLN1);
GO:1904237	positive regulation of substrate-dependent cell migration, cell attachment to substrate	biological_process	31	35266	31	98659	0	0	2.79757	NM_001996.3(FBLN1);NM_002026.2(FN1);NM_006485.3(FBLN1);NM_006486.2(FBLN1);NM_006487.2(FBLN1);NM_054034.2(FN1);NM_212474.1(FN1);NM_212476.1(FN1);NM_212478.1(FN1);NM_212482.1(FN1);XM_005246397.1(FN1);XM_005246398.1(FN1);XM_005246399.1(FN1);XM_005246400.1(FN1);XM_005246401.1(FN1);XM_005246402.1(FN1);XM_005246403.1(FN1);XM_005246404.1(FN1);XM_005246405.1(FN1);XM_005246406.1(FN1);XM_005246407.1(FN1);X…
GO:0014843	growth factor dependent regulation of skeletal muscle satellite cell proliferation	biological_process	1	35266	1	98659	0	0	2.79757	NM_002006.4(FGF2);
GO:0042660	positive regulation of cell fate specification	biological_process	1	35266	1	98659	0	0	2.79757	NM_002006.4(FGF2);
GO:0030222	eosinophil differentiation	biological_process	5	35266	5	98659	0	0	2.79757	NM_002049.3(GATA1);NM_022789.3(IL25);NM_172314.1(IL25);XM_011543897.1(GATA1);XM_011543898.1(GATA1);
GO:0002246	wound healing involved in inflammatory response	biological_process	1	35266	1	98659	0	0	2.79757	NM_002133.2(HMOX1);
GO:1901986	response to ketamine	biological_process	2	35266	2	98659	0	0	2.79757	NM_002143.2(HPCA);XM_005270792.1(HPCA);
GO:1904010	response to Aroclor 1254	biological_process	2	35266	2	98659	0	0	2.79757	NM_002143.2(HPCA);XM_005270792.1(HPCA);
GO:0021546	rhombomere development	biological_process	26	35266	26	98659	0	0	2.79757	NM_002146.4(HOXB3);XM_005257277.3(HOXB3);XM_005257280.3(HOXB3);XM_005257282.3(HOXB3);XM_006721854.2(HOXB3);XM_006721855.2(HOXB3);XM_011524707.1(HOXB3);XM_011524708.1(HOXB3);XM_011524709.1(HOXB3);XM_011524710.1(HOXB3);XM_011524711.1(HOXB3);XM_011524712.1(HOXB3);XM_011524713.1(HOXB3);XM_011524714.1(HOXB3);XM_011524715.1(HOXB3);XM_011524716.1(HOXB3);XM_011524717.1(HOXB3);XM_011524718.1(HOXB3);XM_011…
GO:0010621	negative regulation of transcription by transcription factor localization	biological_process	7	35266	7	98659	0	0	2.79757	NM_002165.3(ID1);NM_002729.4(HHEX);NM_012259.2(HEY2);NM_181353.2(ID1);XM_005266878.2(HEY2);XM_011535649.1(HEY2);XM_011535650.1(HEY2);
GO:0036164	cell-abiotic substrate adhesion	biological_process	2	35266	2	98659	0	0	2.79757	NM_002165.3(ID1);NM_181353.2(ID1);
GO:0001966	thigmotaxis	biological_process	1	35266	1	98659	0	0	2.79757	NM_002166.4(ID2);
GO:0008811	chloramphenicol O-acetyltransferase activity	molecular_function	1	35266	1	98659	0	0	2.79757	NM_002176.2(IFNB1);
GO:0004919	interleukin-9 receptor activity	molecular_function	16	35266	16	98659	0	0	2.79757	NM_002186.2(IL9R);NM_176786.1(IL9R);XM_011531151.1(IL9R);XM_011531152.1(IL9R);XM_011531153.1(IL9R);XM_011531154.1(IL9R);XM_011531155.1(IL9R);XM_011531156.1(IL9R);XM_011531157.1(IL9R);XM_011545645.1(IL9R);XM_011545646.1(IL9R);XM_011545647.1(IL9R);XM_011545649.1(IL9R);XM_011545650.1(IL9R);XM_011545651.1(IL9R);XM_011545652.1(IL9R);
GO:0038113	interleukin-9-mediated signaling pathway	biological_process	16	35266	16	98659	0	0	2.79757	NM_002186.2(IL9R);NM_176786.1(IL9R);XM_011531151.1(IL9R);XM_011531152.1(IL9R);XM_011531153.1(IL9R);XM_011531154.1(IL9R);XM_011531155.1(IL9R);XM_011531156.1(IL9R);XM_011531157.1(IL9R);XM_011545645.1(IL9R);XM_011545646.1(IL9R);XM_011545647.1(IL9R);XM_011545649.1(IL9R);XM_011545650.1(IL9R);XM_011545651.1(IL9R);XM_011545652.1(IL9R);
GO:0046789	host cell surface receptor binding	molecular_function	1	35266	1	98659	0	0	2.79757	NM_002193.2(INHBB);
GO:0048178	negative regulation of hepatocyte growth factor biosynthetic process	biological_process	1	35266	1	98659	0	0	2.79757	NM_002193.2(INHBB);
GO:0003310	pancreatic A cell differentiation	biological_process	4	35266	4	98659	0	0	2.79757	NM_002196.2(INSM1);NM_005257.5(GATA6);NM_173560.3(RFX6);XM_011535589.1(RFX6);
GO:1901258	positive regulation of macrophage colony-stimulating factor production	biological_process	2	35266	2	98659	0	0	2.79757	NM_002202.2(ISL1);XM_011543380.1(ISL1);
GO:0097205	renal filtration	biological_process	3	35266	3	98659	0	0	2.79757	NM_002204.2(ITGA3);NM_005501.2(ITGA3);XM_005257308.1(ITGA3);
GO:0042492	gamma-delta T cell differentiation	biological_process	3	35266	3	98659	0	0	2.79757	NM_002226.4(JAG2);NM_145159.2(JAG2);XM_011536736.1(JAG2);
GO:1990134	epithelial cell apoptotic process involved in palatal shelf morphogenesis	biological_process	3	35266	3	98659	0	0	2.79757	NM_002226.4(JAG2);NM_145159.2(JAG2);XM_011536736.1(JAG2);
GO:0005199	structural constituent of cell wall	molecular_function	12	35266	12	98659	0	0	2.79757	NM_002230.2(JUP);NM_021991.2(JUP);XM_006721873.1(JUP);XM_006721874.1(JUP);XM_006721875.1(JUP);XM_006721878.1(JUP);XM_011524753.1(JUP);XM_011524754.1(JUP);XM_011524755.1(JUP);XM_011524756.1(JUP);XM_011524757.1(JUP);XM_011524758.1(JUP);
GO:0071665	gamma-catenin-TCF7L2 complex	cellular_component	12	35266	12	98659	0	0	2.79757	NM_002230.2(JUP);NM_021991.2(JUP);XM_006721873.1(JUP);XM_006721874.1(JUP);XM_006721875.1(JUP);XM_006721878.1(JUP);XM_011524753.1(JUP);XM_011524754.1(JUP);XM_011524755.1(JUP);XM_011524756.1(JUP);XM_011524757.1(JUP);XM_011524758.1(JUP);
GO:0005252	open rectifier potassium channel activity	molecular_function	2	35266	2	98659	0	0	2.79757	NM_002246.2(KCNK3);XM_005264293.1(KCNK3);
GO:0005608	laminin-3 complex	cellular_component	6	35266	6	98659	0	0	2.79757	NM_002292.3(LAMB2);NM_005559.3(LAMA1);XM_005265127.3(LAMB2);XM_011525655.1(LAMA1);XM_011525656.1(LAMA1);XM_011525657.1(LAMA1);
GO:0048677	axon extension involved in regeneration	biological_process	2	35266	2	98659	0	0	2.79757	NM_002292.3(LAMB2);XM_005265127.3(LAMB2);
GO:0072274	metanephric glomerular basement membrane development	biological_process	2	35266	2	98659	0	0	2.79757	NM_002292.3(LAMB2);XM_005265127.3(LAMB2);
GO:0000016	lactase activity	molecular_function	1	35266	1	98659	0	0	2.79757	NM_002299.2(LCT);
GO:0070421	DNA ligase III-XRCC1 complex	cellular_component	8	35266	8	98659	0	0	2.79757	NM_002311.4(LIG3);NM_013975.3(LIG3);XM_005257970.2(LIG3);XM_006721896.2(LIG3);XM_011524797.1(LIG3);XM_011524798.1(LIG3);XM_011524799.1(LIG3);XM_011524800.1(LIG3);
GO:0097242	beta-amyloid clearance	biological_process	1	35266	1	98659	0	0	2.79757	NM_002332.2(LRP1);
GO:0098641	cadherin binding involved in cell-cell adhesion	molecular_function	1	35266	1	98659	0	0	2.79757	NM_002354.2(EPCAM);
GO:0061312	BMP signaling pathway involved in heart development	biological_process	2	35266	2	98659	0	0	2.79757	NM_002448.3(MSX1);NM_002449.4(MSX2);
GO:0090427	activation of meiosis	biological_process	2	35266	2	98659	0	0	2.79757	NM_002448.3(MSX1);NM_002449.4(MSX2);
GO:2001055	positive regulation of mesenchymal cell apoptotic process	biological_process	2	35266	2	98659	0	0	2.79757	NM_002448.3(MSX1);NM_002449.4(MSX2);
GO:0017061	S-methyl-5-thioadenosine phosphorylase activity	molecular_function	1	35266	1	98659	0	0	2.79757	NM_002451.3(MTAP);
GO:0070702	inner mucus layer	cellular_component	1	35266	1	98659	0	0	2.79757	NM_002457.3(MUC2);
GO:0070703	outer mucus layer	cellular_component	1	35266	1	98659	0	0	2.79757	NM_002457.3(MUC2);
GO:0014908	myotube differentiation involved in skeletal muscle regeneration	biological_process	6	35266	6	98659	0	0	2.79757	NM_002478.4(MYOD1);NM_004326.3(BCL9);XM_005272971.3(BCL9);XM_005277417.2(BCL9);XM_005277418.2(BCL9);XM_006711483.2(BCL9);
GO:1901739	regulation of myoblast fusion	biological_process	1	35266	1	98659	0	0	2.79757	NM_002479.5(MYOG);
GO:0035883	enteroendocrine cell differentiation	biological_process	1	35266	1	98659	0	0	2.79757	NM_002500.4(NEUROD1);
GO:0060730	regulation of intestinal epithelial structure maintenance	biological_process	1	35266	1	98659	0	0	2.79757	NM_002500.4(NEUROD1);
GO:0070678	preprotein binding	molecular_function	1	35266	1	98659	0	0	2.79757	NM_002507.3(NGFR);
GO:0008613	diuretic hormone activity	molecular_function	1	35266	1	98659	0	0	2.79757	NM_002521.2(NPPB);
GO:0016492	G-protein coupled neurotensin receptor activity	molecular_function	7	35266	7	98659	0	0	2.79757	NM_002531.2(NTSR1);NM_012344.3(NTSR2);XM_005246156.2(NTSR2);XM_006711876.2(NTSR2);XM_006711877.2(NTSR2);XM_006711878.2(NTSR2);XM_011528827.1(NTSR1);
GO:0071545	inositol phosphate catabolic process	biological_process	2	35266	2	98659	0	0	2.79757	NM_002531.2(NTSR1);XM_011528827.1(NTSR1);
GO:1990123	L-glutamate import into cell	biological_process	2	35266	2	98659	0	0	2.79757	NM_002531.2(NTSR1);XM_011528827.1(NTSR1);
GO:1901096	regulation of autophagosome maturation	biological_process	1	35266	1	98659	0	0	2.79757	NM_002536.2(TBC1D25);
GO:0015065	uridine nucleotide receptor activity	molecular_function	1	35266	1	98659	0	0	2.79757	NM_002565.3(P2RY4);
GO:0072255	metanephric glomerular mesangial cell development	biological_process	2	35266	2	98659	0	0	2.79757	NM_002608.2(PDGFB);NM_033016.2(PDGFB);
GO:1905064	negative regulation of vascular smooth muscle cell differentiation	biological_process	2	35266	2	98659	0	0	2.79757	NM_002608.2(PDGFB);NM_033016.2(PDGFB);
GO:1905176	positive regulation of vascular smooth muscle cell dedifferentiation	biological_process	2	35266	2	98659	0	0	2.79757	NM_002608.2(PDGFB);NM_033016.2(PDGFB);
GO:2000591	positive regulation of metanephric mesenchymal cell migration	biological_process	2	35266	2	98659	0	0	2.79757	NM_002608.2(PDGFB);NM_033016.2(PDGFB);
GO:0005017	platelet-derived growth factor-activated receptor activity	molecular_function	5	35266	5	98659	0	0	2.79757	NM_002609.3(PDGFRB);XM_005268464.2(PDGFRB);XM_011537658.1(PDGFRB);XM_011537659.1(PDGFRB);XM_011537660.1(PDGFRB);
GO:0035789	metanephric mesenchymal cell migration	biological_process	5	35266	5	98659	0	0	2.79757	NM_002609.3(PDGFRB);XM_005268464.2(PDGFRB);XM_011537658.1(PDGFRB);XM_011537659.1(PDGFRB);XM_011537660.1(PDGFRB);
GO:0060981	cell migration involved in coronary angiogenesis	biological_process	5	35266	5	98659	0	0	2.79757	NM_002609.3(PDGFRB);XM_005268464.2(PDGFRB);XM_011537658.1(PDGFRB);XM_011537659.1(PDGFRB);XM_011537660.1(PDGFRB);
GO:0072262	metanephric glomerular mesangial cell proliferation involved in metanephros development	biological_process	5	35266	5	98659	0	0	2.79757	NM_002609.3(PDGFRB);XM_005268464.2(PDGFRB);XM_011537658.1(PDGFRB);XM_011537659.1(PDGFRB);XM_011537660.1(PDGFRB);
GO:0001792	polymeric immunoglobulin receptor activity	molecular_function	2	35266	2	98659	0	0	2.79757	NM_002644.3(PIGR);XM_011509629.1(PIGR);
GO:0002316	follicular B cell differentiation	biological_process	2	35266	2	98659	0	0	2.79757	NM_002661.4(PLCG2);XM_011523108.1(PLCG2);
GO:0050115	myosin-light-chain-phosphatase activity	molecular_function	2	35266	2	98659	0	0	2.79757	NM_002709.2(PPP1CB);NM_206876.1(PPP1CB);
GO:0002573	myeloid leukocyte differentiation	biological_process	1	35266	1	98659	0	0	2.79757	NM_002729.4(HHEX);
GO:0060431	primary lung bud formation	biological_process	3	35266	3	98659	0	0	2.79757	NM_002729.4(HHEX);NM_172037.4(RDH10);XM_011517466.1(RDH10);
GO:0061011	hepatic duct development	biological_process	1	35266	1	98659	0	0	2.79757	NM_002729.4(HHEX);
GO:0071103	DNA conformation change	biological_process	1	35266	1	98659	0	0	2.79757	NM_002729.4(HHEX);
GO:0002637	regulation of immunoglobulin production	biological_process	4	35266	4	98659	0	0	2.79757	NM_002741.3(PKN1);NM_213560.1(PKN1);XM_011528128.1(PKN1);XM_011528129.1(PKN1);
GO:0030821	negative regulation of cAMP catabolic process	biological_process	12	35266	12	98659	0	0	2.79757	NM_002749.3(MAPK7);NM_022051.2(EGLN1);NM_139032.2(MAPK7);NM_139033.2(MAPK7);NM_139034.2(MAPK7);XM_005256719.2(MAPK7);XM_005273166.3(EGLN1);XM_005273167.3(EGLN1);XM_006721557.2(MAPK7);XM_006721558.2(MAPK7);XM_006721559.2(MAPK7);XM_011523957.1(MAPK7);
GO:0070377	negative regulation of ERK5 cascade	biological_process	9	35266	9	98659	0	0	2.79757	NM_002749.3(MAPK7);NM_139032.2(MAPK7);NM_139033.2(MAPK7);NM_139034.2(MAPK7);XM_005256719.2(MAPK7);XM_006721557.2(MAPK7);XM_006721558.2(MAPK7);XM_006721559.2(MAPK7);XM_011523957.1(MAPK7);
GO:1901423	response to benzene	biological_process	4	35266	4	98659	0	0	2.79757	NM_002800.4(PSMB9);XM_011546317.1(PSMB9);XM_011548065.1(PSMB9);XM_011548455.1(PSMB9);
GO:0001872	(1->3)-beta-D-glucan binding	molecular_function	1	35266	1	98659	0	0	2.79757	NM_002852.3(PTX3);
GO:0048790	maintenance of presynaptic active zone structure	biological_process	2	35266	2	98659	0	0	2.79757	NM_002866.4(RAB3A);XM_011528164.1(RAB3A);
GO:0050975	sensory perception of touch	biological_process	2	35266	2	98659	0	0	2.79757	NM_002866.4(RAB3A);XM_011528164.1(RAB3A);
GO:0061670	evoked neurotransmitter secretion	biological_process	2	35266	2	98659	0	0	2.79757	NM_002866.4(RAB3A);XM_011528164.1(RAB3A);
GO:0051347	positive regulation of transferase activity	biological_process	1	35266	1	98659	0	0	2.79757	NM_002952.3(RPS2);
GO:0008218	bioluminescence	biological_process	6	35266	6	98659	0	0	2.79757	NM_002998.3(SDC2);XM_005251019.3(SDC2);XM_005251020.2(SDC2);XM_006716614.2(SDC2);XM_011517211.1(SDC2);XM_011517212.1(SDC2);
GO:0022601	menstrual cycle phase	biological_process	1	35266	1	98659	0	0	2.79757	NM_003012.4(SFRP1);
GO:0044345	stromal-epithelial cell signaling involved in prostate gland development	biological_process	1	35266	1	98659	0	0	2.79757	NM_003012.4(SFRP1);
GO:0090246	convergent extension involved in somitogenesis	biological_process	1	35266	1	98659	0	0	2.79757	NM_003012.4(SFRP1);
GO:2000041	negative regulation of planar cell polarity pathway involved in axis elongation	biological_process	2	35266	2	98659	0	0	2.79757	NM_003012.4(SFRP1);NM_003013.2(SFRP2);
GO:2000054	negative regulation of Wnt signaling pathway involved in dorsal/ventral axis specification	biological_process	2	35266	2	98659	0	0	2.79757	NM_003012.4(SFRP1);NM_025237.2(SOST);
GO:2000080	negative regulation of canonical Wnt signaling pathway involved in controlling type B pancreatic cell proliferation	biological_process	1	35266	1	98659	0	0	2.79757	NM_003012.4(SFRP1);
GO:0061185	negative regulation of dermatome development	biological_process	1	35266	1	98659	0	0	2.79757	NM_003013.2(SFRP2);
GO:2000057	negative regulation of Wnt signaling pathway involved in digestive tract morphogenesis	biological_process	1	35266	1	98659	0	0	2.79757	NM_003015.3(SFRP5);
GO:0051939	gamma-aminobutyric acid import	biological_process	1	35266	1	98659	0	0	2.79757	NM_003042.3(SLC6A1);
GO:0005333	norepinephrine transmembrane transporter activity	molecular_function	2	35266	2	98659	0	0	2.79757	NM_003057.2(SLC22A1);NM_153187.1(SLC22A1);
GO:0008513	secondary active organic cation transmembrane transporter activity	molecular_function	3	35266	3	98659	0	0	2.79757	NM_003057.2(SLC22A1);NM_003059.2(SLC22A4);NM_153187.1(SLC22A1);
GO:0048241	epinephrine transport	biological_process	2	35266	2	98659	0	0	2.79757	NM_003057.2(SLC22A1);NM_153187.1(SLC22A1);
GO:1901374	acetate ester transport	biological_process	2	35266	2	98659	0	0	2.79757	NM_003057.2(SLC22A1);NM_153187.1(SLC22A1);
GO:0051608	histamine transport	biological_process	1	35266	1	98659	0	0	2.79757	NM_003058.3(SLC22A2);
GO:1901881	positive regulation of protein depolymerization	biological_process	1	35266	1	98659	0	0	2.79757	NM_003063.2(SLN);
GO:0035921	desmosome disassembly	biological_process	1	35266	1	98659	0	0	2.79757	NM_003068.4(SNAI2);
GO:1900387	negative regulation of cell-cell adhesion by negative regulation of transcription from RNA polymerase II promoter	biological_process	1	35266	1	98659	0	0	2.79757	NM_003068.4(SNAI2);
GO:1902771	positive regulation of choline O-acetyltransferase activity	biological_process	6	35266	6	98659	0	0	2.79757	NM_003105.5(SORL1);XM_011542963.1(SORL1);XM_011542964.1(SORL1);XM_011542965.1(SORL1);XM_011542966.1(SORL1);XM_011542967.1(SORL1);
GO:1902948	negative regulation of tau-protein kinase activity	biological_process	6	35266	6	98659	0	0	2.79757	NM_003105.5(SORL1);XM_011542963.1(SORL1);XM_011542964.1(SORL1);XM_011542965.1(SORL1);XM_011542966.1(SORL1);XM_011542967.1(SORL1);
GO:1902955	positive regulation of early endosome to recycling endosome transport	biological_process	6	35266	6	98659	0	0	2.79757	NM_003105.5(SORL1);XM_011542963.1(SORL1);XM_011542964.1(SORL1);XM_011542965.1(SORL1);XM_011542966.1(SORL1);XM_011542967.1(SORL1);
GO:1902960	negative regulation of aspartic-type endopeptidase activity involved in amyloid precursor protein catabolic process	biological_process	6	35266	6	98659	0	0	2.79757	NM_003105.5(SORL1);XM_011542963.1(SORL1);XM_011542964.1(SORL1);XM_011542965.1(SORL1);XM_011542966.1(SORL1);XM_011542967.1(SORL1);
GO:1902997	negative regulation of neurofibrillary tangle assembly	biological_process	6	35266	6	98659	0	0	2.79757	NM_003105.5(SORL1);XM_011542963.1(SORL1);XM_011542964.1(SORL1);XM_011542965.1(SORL1);XM_011542966.1(SORL1);XM_011542967.1(SORL1);
GO:0003357	noradrenergic neuron differentiation	biological_process	5	35266	5	98659	0	0	2.79757	NM_003107.2(SOX4);NM_003108.3(SOX11);NM_003924.3(PHOX2B);NM_005169.3(PHOX2A);NM_021973.2(HAND2);
GO:2000761	positive regulation of N-terminal peptidyl-lysine acetylation	biological_process	1	35266	1	98659	0	0	2.79757	NM_003107.2(SOX4);
GO:0035332	positive regulation of hippo signaling	biological_process	1	35266	1	98659	0	0	2.79757	NM_003108.3(SOX11);
GO:0072395	signal transduction involved in cell cycle checkpoint	biological_process	1	35266	1	98659	0	0	2.79757	NM_003108.3(SOX11);
GO:0004757	sepiapterin reductase activity	molecular_function	1	35266	1	98659	0	0	2.79757	NM_003124.4(SPR);
GO:0004766	spermidine synthase activity	molecular_function	1	35266	1	98659	0	0	2.79757	NM_003132.2(SRM);
GO:1904792	positive regulation of telosome assembly	biological_process	5	35266	5	98659	0	0	2.79757	NM_003218.3(TERF1);NM_017489.2(TERF1);XM_005251291.2(TERF1);XM_005251292.2(TERF1);XM_011517582.1(TERF1);
GO:1904850	negative regulation of establishment of protein localization to telomere	biological_process	5	35266	5	98659	0	0	2.79757	NM_003218.3(TERF1);NM_017489.2(TERF1);XM_005251291.2(TERF1);XM_005251292.2(TERF1);XM_011517582.1(TERF1);
GO:1904911	negative regulation of establishment of RNA localization to telomere	biological_process	5	35266	5	98659	0	0	2.79757	NM_003218.3(TERF1);NM_017489.2(TERF1);XM_005251291.2(TERF1);XM_005251292.2(TERF1);XM_011517582.1(TERF1);
GO:1904914	negative regulation of establishment of macromolecular complex localization to telomere	biological_process	5	35266	5	98659	0	0	2.79757	NM_003218.3(TERF1);NM_017489.2(TERF1);XM_005251291.2(TERF1);XM_005251292.2(TERF1);XM_011517582.1(TERF1);
GO:0043168	anion binding	molecular_function	6	35266	6	98659	0	0	2.79757	NM_003235.4(TG);XM_005251038.3(TG);XM_005251040.3(TG);XM_005251042.3(TG);XM_005251043.3(TG);XM_006716622.2(TG);
GO:1901588	dendritic microtubule	cellular_component	2	35266	2	98659	0	0	2.79757	NM_003388.4(CLIP2);NM_032421.2(CLIP2);
GO:0003339	regulation of mesenchymal to epithelial transition involved in metanephros morphogenesis	biological_process	5	35266	5	98659	0	0	2.79757	NM_003396.1(WNT9B);XM_005257637.2(WNT9B);XM_006725631.2(WNT9B);XM_011525178.1(WNT9B);XM_011547495.1(WNT9B);
GO:0035150	regulation of tube size	biological_process	5	35266	5	98659	0	0	2.79757	NM_003396.1(WNT9B);XM_005257637.2(WNT9B);XM_006725631.2(WNT9B);XM_011525178.1(WNT9B);XM_011547495.1(WNT9B);
GO:0072003	kidney rudiment formation	biological_process	5	35266	5	98659	0	0	2.79757	NM_003396.1(WNT9B);XM_005257637.2(WNT9B);XM_006725631.2(WNT9B);XM_011525178.1(WNT9B);XM_011547495.1(WNT9B);
GO:0072046	establishment of planar polarity involved in nephron morphogenesis	biological_process	5	35266	5	98659	0	0	2.79757	NM_003396.1(WNT9B);XM_005257637.2(WNT9B);XM_006725631.2(WNT9B);XM_011525178.1(WNT9B);XM_011547495.1(WNT9B);
GO:0048788	cytoskeleton of presynaptic active zone	cellular_component	3	35266	3	98659	0	0	2.79757	NM_003458.3(BSN);NM_014510.2(PCLO);NM_033026.5(PCLO);
GO:0015633	zinc transporting ATPase activity	molecular_function	1	35266	1	98659	0	0	2.79757	NM_003459.4(SLC30A3);
GO:0051050	positive regulation of transport	biological_process	1	35266	1	98659	0	0	2.79757	NM_003459.4(SLC30A3);
GO:0009628	response to abiotic stimulus	biological_process	3	35266	3	98659	0	0	2.79757	NM_003498.5(SNN);NM_003920.3(TIMELESS);XM_011538939.1(TIMELESS);
GO:0001743	optic placode formation	biological_process	9	35266	9	98659	0	0	2.79757	NM_003502.3(AXIN1);NM_181050.2(AXIN1);XM_011522682.1(AXIN1);XM_011522683.1(AXIN1);XM_011522684.1(AXIN1);XM_011522685.1(AXIN1);XM_011522686.1(AXIN1);XM_011522687.1(AXIN1);XM_011522688.1(AXIN1);
GO:0021881	Wnt-activated signaling pathway involved in forebrain neuron fate commitment	biological_process	9	35266	9	98659	0	0	2.79757	NM_003502.3(AXIN1);NM_181050.2(AXIN1);XM_011522682.1(AXIN1);XM_011522683.1(AXIN1);XM_011522684.1(AXIN1);XM_011522685.1(AXIN1);XM_011522686.1(AXIN1);XM_011522687.1(AXIN1);XM_011522688.1(AXIN1);
GO:0048320	axial mesoderm formation	biological_process	10	35266	10	98659	0	0	2.79757	NM_003502.3(AXIN1);NM_004431.3(EPHA2);NM_181050.2(AXIN1);XM_011522682.1(AXIN1);XM_011522683.1(AXIN1);XM_011522684.1(AXIN1);XM_011522685.1(AXIN1);XM_011522686.1(AXIN1);XM_011522687.1(AXIN1);XM_011522688.1(AXIN1);
GO:0060823	canonical Wnt signaling pathway involved in neural plate anterior/posterior pattern formation	biological_process	9	35266	9	98659	0	0	2.79757	NM_003502.3(AXIN1);NM_181050.2(AXIN1);XM_011522682.1(AXIN1);XM_011522683.1(AXIN1);XM_011522684.1(AXIN1);XM_011522685.1(AXIN1);XM_011522686.1(AXIN1);XM_011522687.1(AXIN1);XM_011522688.1(AXIN1);
GO:0042666	negative regulation of ectodermal cell fate specification	biological_process	1	35266	1	98659	0	0	2.79757	NM_003507.1(FZD7);
GO:0008445	D-aspartate oxidase activity	molecular_function	2	35266	2	98659	0	0	2.79757	NM_003649.2(DDO);NM_004032.2(DDO);
GO:0003192	mitral valve formation	biological_process	11	35266	11	98659	0	0	2.79757	NM_003737.3(DCHS1);NM_017617.3(NOTCH1);NM_153813.2(ZFPM1);XM_011518717.1(NOTCH1);XM_011522912.1(ZFPM1);XM_011522913.1(ZFPM1);XM_011522914.1(ZFPM1);XM_011522915.1(ZFPM1);XM_011522916.1(ZFPM1);XM_011522917.1(ZFPM1);XM_011522918.1(ZFPM1);
GO:0010534	regulation of activation of JAK2 kinase activity	biological_process	1	35266	1	98659	0	0	2.79757	NM_003745.1(SOCS1);
GO:0047915	ganglioside galactosyltransferase activity	molecular_function	1	35266	1	98659	0	0	2.79757	NM_003782.3(B3GALT4);
GO:0005035	death receptor activity	molecular_function	1	35266	1	98659	0	0	2.79757	NM_003844.3(TNFRSF10A);
GO:0034722	gamma-glutamyl-peptidase activity	molecular_function	2	35266	2	98659	0	0	2.79757	NM_003878.2(GGH);XM_011517623.1(GGH);
GO:0046900	tetrahydrofolylpolyglutamate metabolic process	biological_process	2	35266	2	98659	0	0	2.79757	NM_003878.2(GGH);XM_011517623.1(GGH);
GO:0008117	sphinganine-1-phosphate aldolase activity	molecular_function	7	35266	7	98659	0	0	2.79757	NM_003901.3(SGPL1);XM_005270263.1(SGPL1);XM_006718053.1(SGPL1);XM_011540316.1(SGPL1);XM_011540317.1(SGPL1);XM_011540318.1(SGPL1);XM_011540319.1(SGPL1);
GO:0021723	medullary reticular formation development	biological_process	1	35266	1	98659	0	0	2.79757	NM_003924.3(PHOX2B);
GO:0021934	hindbrain tangential cell migration	biological_process	1	35266	1	98659	0	0	2.79757	NM_003924.3(PHOX2B);
GO:0048486	parasympathetic nervous system development	biological_process	1	35266	1	98659	0	0	2.79757	NM_003924.3(PHOX2B);
GO:0048894	efferent axon development in a lateral line nerve	biological_process	1	35266	1	98659	0	0	2.79757	NM_003924.3(PHOX2B);
GO:0061452	retrotrapezoid nucleus neuron differentiation	biological_process	1	35266	1	98659	0	0	2.79757	NM_003924.3(PHOX2B);
GO:1904454	ubiquitin-specific protease activity involved in positive regulation of ERAD pathway	molecular_function	2	35266	2	98659	0	0	2.79757	NM_003940.2(USP13);XM_011513269.1(USP13);
GO:0061723	glycophagy	biological_process	1	35266	1	98659	0	0	2.79757	NM_003943.4(STBD1);
GO:1990256	signal clustering	biological_process	1	35266	1	98659	0	0	2.79757	NM_003966.2(SEMA5A);
GO:0002462	tolerance induction to nonself antigen	biological_process	1	35266	1	98659	0	0	2.79757	NM_004054.2(C3AR1);
GO:0004876	complement component C3a receptor activity	molecular_function	1	35266	1	98659	0	0	2.79757	NM_004054.2(C3AR1);
GO:0004943	C3a anaphylatoxin receptor activity	molecular_function	1	35266	1	98659	0	0	2.79757	NM_004054.2(C3AR1);
GO:0060014	granulosa cell differentiation	biological_process	3	35266	3	98659	0	0	2.79757	NM_004055.4(CAPN5);NM_023067.3(FOXL2);XM_011545225.1(CAPN5);
GO:0010752	regulation of cGMP-mediated signaling	biological_process	8	35266	8	98659	0	0	2.79757	NM_004103.4(PTK2B);NM_173174.2(PTK2B);NM_173175.2(PTK2B);NM_173176.2(PTK2B);XM_005273447.3(PTK2B);XM_005273448.3(PTK2B);XM_011544441.1(PTK2B);XM_011544442.1(PTK2B);
GO:0010758	regulation of macrophage chemotaxis	biological_process	8	35266	8	98659	0	0	2.79757	NM_004103.4(PTK2B);NM_173174.2(PTK2B);NM_173175.2(PTK2B);NM_173176.2(PTK2B);XM_005273447.3(PTK2B);XM_005273448.3(PTK2B);XM_011544441.1(PTK2B);XM_011544442.1(PTK2B);
GO:0030826	regulation of cGMP biosynthetic process	biological_process	8	35266	8	98659	0	0	2.79757	NM_004103.4(PTK2B);NM_173174.2(PTK2B);NM_173175.2(PTK2B);NM_173176.2(PTK2B);XM_005273447.3(PTK2B);XM_005273448.3(PTK2B);XM_011544441.1(PTK2B);XM_011544442.1(PTK2B);
GO:0032960	regulation of inositol trisphosphate biosynthetic process	biological_process	8	35266	8	98659	0	0	2.79757	NM_004103.4(PTK2B);NM_173174.2(PTK2B);NM_173175.2(PTK2B);NM_173176.2(PTK2B);XM_005273447.3(PTK2B);XM_005273448.3(PTK2B);XM_011544441.1(PTK2B);XM_011544442.1(PTK2B);
GO:0042976	activation of Janus kinase activity	biological_process	8	35266	8	98659	0	0	2.79757	NM_004103.4(PTK2B);NM_173174.2(PTK2B);NM_173175.2(PTK2B);NM_173176.2(PTK2B);XM_005273447.3(PTK2B);XM_005273448.3(PTK2B);XM_011544441.1(PTK2B);XM_011544442.1(PTK2B);
GO:0004312	fatty acid synthase activity	molecular_function	2	35266	2	98659	0	0	2.79757	NM_004104.4(FASN);XM_011523538.1(FASN);
GO:0004313	[acyl-carrier-protein] S-acetyltransferase activity	molecular_function	2	35266	2	98659	0	0	2.79757	NM_004104.4(FASN);XM_011523538.1(FASN);
GO:0004316	3-oxoacyl-[acyl-carrier-protein] reductase (NADPH) activity	molecular_function	2	35266	2	98659	0	0	2.79757	NM_004104.4(FASN);XM_011523538.1(FASN);
GO:0004317	3-hydroxypalmitoyl-[acyl-carrier-protein] dehydratase activity	molecular_function	2	35266	2	98659	0	0	2.79757	NM_004104.4(FASN);XM_011523538.1(FASN);
GO:0004319	enoyl-[acyl-carrier-protein] reductase (NADPH, B-specific) activity	molecular_function	2	35266	2	98659	0	0	2.79757	NM_004104.4(FASN);XM_011523538.1(FASN);
GO:0031177	phosphopantetheine binding	molecular_function	2	35266	2	98659	0	0	2.79757	NM_004104.4(FASN);XM_011523538.1(FASN);
GO:0047117	enoyl-[acyl-carrier-protein] reductase (NADPH, A-specific) activity	molecular_function	2	35266	2	98659	0	0	2.79757	NM_004104.4(FASN);XM_011523538.1(FASN);
GO:0047451	3-hydroxyoctanoyl-[acyl-carrier-protein] dehydratase activity	molecular_function	2	35266	2	98659	0	0	2.79757	NM_004104.4(FASN);XM_011523538.1(FASN);
GO:0001616	growth hormone secretagogue receptor activity	molecular_function	2	35266	2	98659	0	0	2.79757	NM_004122.2(GHSR);NM_198407.2(GHSR);
GO:0043134	regulation of hindgut contraction	biological_process	2	35266	2	98659	0	0	2.79757	NM_004122.2(GHSR);NM_198407.2(GHSR);
GO:0070094	positive regulation of glucagon secretion	biological_process	1	35266	1	98659	0	0	2.79757	NM_004123.2(GIP);
GO:0015211	purine nucleoside transmembrane transporter activity	molecular_function	1	35266	1	98659	0	0	2.79757	NM_004212.3(SLC28A2);
GO:0003096	renal sodium ion transport	biological_process	1	35266	1	98659	0	0	2.79757	NM_004252.4(SLC9A3R1);
GO:0032415	regulation of sodium:proton antiporter activity	biological_process	1	35266	1	98659	0	0	2.79757	NM_004252.4(SLC9A3R1);
GO:0032782	bile acid secretion	biological_process	2	35266	2	98659	0	0	2.79757	NM_004252.4(SLC9A3R1);NM_006645.2(STARD10);
GO:0034635	glutathione transport	biological_process	1	35266	1	98659	0	0	2.79757	NM_004252.4(SLC9A3R1);
GO:0097291	renal phosphate ion absorption	biological_process	1	35266	1	98659	0	0	2.79757	NM_004252.4(SLC9A3R1);
GO:0008459	chondroitin 6-sulfotransferase activity	molecular_function	4	35266	4	98659	0	0	2.79757	NM_004273.4(CHST3);NM_019886.3(CHST7);XM_006718075.2(CHST3);XM_011540369.1(CHST3);
GO:0060987	lipid tube	cellular_component	28	35266	28	98659	0	0	2.79757	NM_004305.3(BIN1);NM_139343.2(BIN1);NM_139344.2(BIN1);NM_139345.2(BIN1);NM_139346.2(BIN1);NM_139347.2(BIN1);NM_139348.2(BIN1);NM_139349.2(BIN1);NM_139350.2(BIN1);NM_139351.2(BIN1);XM_005263642.2(BIN1);XM_005263643.2(BIN1);XM_005263644.2(BIN1);XM_005263645.1(BIN1);XM_005263646.2(BIN1);XM_005263647.2(BIN1);XM_005263648.1(BIN1);XM_006712425.2(BIN1);XM_006712426.2(BIN1);XM_006712427.1(BIN1);XM_006712…
GO:0002737	negative regulation of plasmacytoid dendritic cell cytokine production	biological_process	1	35266	1	98659	0	0	2.79757	NM_004335.3(BST2);
GO:0070335	aspartate binding	molecular_function	6	35266	6	98659	0	0	2.79757	NM_004341.3(CAD);XM_005264555.2(CAD);XM_005264556.2(CAD);XM_005264557.2(CAD);XM_005264558.2(CAD);XM_006712101.1(CAD);
GO:0002502	peptide antigen assembly with MHC class I protein complex	biological_process	1	35266	1	98659	0	0	2.79757	NM_004343.3(CALR);
GO:0008397	sterol 12-alpha-hydroxylase activity	molecular_function	1	35266	1	98659	0	0	2.79757	NM_004391.2(CYP8B1);
GO:0033778	7alpha-hydroxycholest-4-en-3-one 12alpha-hydroxylase activity	molecular_function	1	35266	1	98659	0	0	2.79757	NM_004391.2(CYP8B1);
GO:0035375	zymogen binding	molecular_function	33	35266	33	98659	0	0	2.79757	NM_004406.2(DMBT1);NM_007329.2(DMBT1);NM_017579.2(DMBT1);XM_006717660.2(DMBT1);XM_006717665.2(DMBT1);XM_011539388.1(DMBT1);XM_011539389.1(DMBT1);XM_011539390.1(DMBT1);XM_011539391.1(DMBT1);XM_011539392.1(DMBT1);XM_011539393.1(DMBT1);XM_011539394.1(DMBT1);XM_011539395.1(DMBT1);XM_011539396.1(DMBT1);XM_011539397.1(DMBT1);XM_011539398.1(DMBT1);XM_011539399.1(DMBT1);XM_011539400.1(DMBT1);XM_011539401…
GO:0060035	notochord cell development	biological_process	1	35266	1	98659	0	0	2.79757	NM_004431.3(EPHA2);
GO:0036475	neuron death in response to oxidative stress	biological_process	2	35266	2	98659	0	0	2.79757	NM_004435.2(ENDOG);XM_011518347.1(ENDOG);
GO:0060678	dichotomous subdivision of terminal units involved in ureteric bud branching	biological_process	1	35266	1	98659	0	0	2.79757	NM_004472.2(FOXD1);
GO:0072076	nephrogenic mesenchyme development	biological_process	1	35266	1	98659	0	0	2.79757	NM_004472.2(FOXD1);
GO:0072213	metanephric capsule development	biological_process	1	35266	1	98659	0	0	2.79757	NM_004472.2(FOXD1);
GO:0072267	metanephric capsule specification	biological_process	1	35266	1	98659	0	0	2.79757	NM_004472.2(FOXD1);
GO:0030366	molybdopterin synthase activity	molecular_function	2	35266	2	98659	0	0	2.79757	NM_004531.4(MOCS2);NM_176806.3(MOCS2);
GO:0042942	D-serine transport	biological_process	2	35266	2	98659	0	0	2.79757	NM_004556.2(NFKBIE);NM_019849.2(SLC7A10);
GO:0036250	peroxisome transport along microtubule	biological_process	6	35266	6	98659	0	0	2.79757	NM_004565.2(PEX14);XM_005263470.3(PEX14);XM_011541577.1(PEX14);XM_011541578.1(PEX14);XM_011541579.1(PEX14);XM_011541580.1(PEX14);
GO:0044721	protein import into peroxisome matrix, substrate release	biological_process	6	35266	6	98659	0	0	2.79757	NM_004565.2(PEX14);XM_005263470.3(PEX14);XM_011541577.1(PEX14);XM_011541578.1(PEX14);XM_011541579.1(PEX14);XM_011541580.1(PEX14);
GO:1903053	regulation of extracellular matrix organization	biological_process	3	35266	3	98659	0	0	2.79757	NM_004609.3(TCF15);NM_005157.5(ABL1);NM_007313.2(ABL1);
GO:0032423	regulation of mismatch repair	biological_process	5	35266	5	98659	0	0	2.79757	NM_004655.3(AXIN2);XM_011525319.1(AXIN2);XM_011525320.1(AXIN2);XM_011525321.1(AXIN2);XM_011525322.1(AXIN2);
GO:0061181	regulation of chondrocyte development	biological_process	5	35266	5	98659	0	0	2.79757	NM_004655.3(AXIN2);XM_011525319.1(AXIN2);XM_011525320.1(AXIN2);XM_011525321.1(AXIN2);XM_011525322.1(AXIN2);
GO:1903638	positive regulation of protein import into mitochondrial outer membrane	biological_process	2	35266	2	98659	0	0	2.79757	NM_004708.3(PDCD5);XM_005259392.3(PDCD5);
GO:1903645	negative regulation of chaperone-mediated protein folding	biological_process	2	35266	2	98659	0	0	2.79757	NM_004708.3(PDCD5);XM_005259392.3(PDCD5);
GO:0097254	renal tubular secretion	biological_process	4	35266	4	98659	0	0	2.79757	NM_004790.4(SLC22A6);NM_153276.2(SLC22A6);NM_153277.2(SLC22A6);NM_153278.2(SLC22A6);
GO:0032581	ER-dependent peroxisome organization	biological_process	3	35266	3	98659	0	0	2.79757	NM_004813.2(PEX16);NM_057174.2(PEX16);XM_011520474.1(PEX16);
GO:0003144	embryonic heart tube formation	biological_process	2	35266	2	98659	0	0	2.79757	NM_004821.2(HAND1);XM_005268531.1(HAND1);
GO:0007538	primary sex determination	biological_process	5	35266	5	98659	0	0	2.79757	NM_004959.4(NR5A1);XM_005251871.2(NR5A1);XM_005251872.3(NR5A1);XM_011518455.1(NR5A1);XM_011518456.1(NR5A1);
GO:0015420	cobalamin-transporting ATPase activity	molecular_function	1	35266	1	98659	0	0	2.79757	NM_004996.3(ABCC1);
GO:0097031	mitochondrial respiratory chain complex I biogenesis	biological_process	1	35266	1	98659	0	0	2.79757	NM_005015.3(OXA1L);
GO:0070194	synaptonemal complex disassembly	biological_process	2	35266	2	98659	0	0	2.79757	NM_005030.4(PLK1);NM_021979.3(HSPA2);
GO:0021511	spinal cord patterning	biological_process	2	35266	2	98659	0	0	2.79757	NM_005045.3(RELN);NM_173054.2(RELN);
GO:1902078	positive regulation of lateral motor column neuron migration	biological_process	2	35266	2	98659	0	0	2.79757	NM_005045.3(RELN);NM_173054.2(RELN);
GO:0045876	positive regulation of sister chromatid cohesion	biological_process	5	35266	5	98659	0	0	2.79757	NM_005066.2(SFPQ);XM_005271112.3(SFPQ);XM_005271113.3(SFPQ);XM_005271115.3(SFPQ);XM_011541950.1(SFPQ);
GO:0071206	establishment of protein localization to juxtaparanode region of axon	biological_process	2	35266	2	98659	0	0	2.79757	NM_005076.3(CNTN2);XM_011509925.1(CNTN2);
GO:0097090	presynaptic membrane organization	biological_process	2	35266	2	98659	0	0	2.79757	NM_005076.3(CNTN2);XM_011509925.1(CNTN2);
GO:0001579	medium-chain fatty acid transport	biological_process	2	35266	2	98659	0	0	2.79757	NM_005094.3(SLC27A4);NM_198580.2(SLC27A1);
GO:0002333	transitional one stage B cell differentiation	biological_process	2	35266	2	98659	0	0	2.79757	NM_005157.5(ABL1);NM_007313.2(ABL1);
GO:1904528	positive regulation of microtubule binding	biological_process	2	35266	2	98659	0	0	2.79757	NM_005157.5(ABL1);NM_007313.2(ABL1);
GO:1904531	positive regulation of actin filament binding	biological_process	2	35266	2	98659	0	0	2.79757	NM_005157.5(ABL1);NM_007313.2(ABL1);
GO:0033275	actin-myosin filament sliding	biological_process	1	35266	1	98659	0	0	2.79757	NM_005159.4(ACTC1);
GO:0042643	actomyosin, actin portion	cellular_component	1	35266	1	98659	0	0	2.79757	NM_005159.4(ACTC1);
GO:0021642	trochlear nerve formation	biological_process	1	35266	1	98659	0	0	2.79757	NM_005169.3(PHOX2A);
GO:0021703	locus ceruleus development	biological_process	1	35266	1	98659	0	0	2.79757	NM_005169.3(PHOX2A);
GO:0045137	development of primary sexual characteristics	biological_process	4	35266	4	98659	0	0	2.79757	NM_005189.2(CBX2);NM_032647.3(CBX2);XM_011525382.1(CBX2);XM_011525383.1(CBX2);
GO:1903141	negative regulation of establishment of endothelial barrier	biological_process	1	35266	1	98659	0	0	2.79757	NM_005226.3(S1PR3);
GO:0007495	visceral mesoderm-endoderm interaction involved in midgut development	biological_process	1	35266	1	98659	0	0	2.79757	NM_005250.2(FOXL1);
GO:0007493	endodermal cell fate determination	biological_process	2	35266	2	98659	0	0	2.79757	NM_005257.5(GATA6);NM_022454.3(SOX17);
GO:0035239	tube morphogenesis	biological_process	1	35266	1	98659	0	0	2.79757	NM_005257.5(GATA6);
GO:0003174	mitral valve development	biological_process	4	35266	4	98659	0	0	2.79757	NM_005266.6(GJA5);NM_181703.3(GJA5);XM_005272951.3(GJA5);XM_011509415.1(GJA5);
GO:0003284	septum primum development	biological_process	4	35266	4	98659	0	0	2.79757	NM_005266.6(GJA5);NM_181703.3(GJA5);XM_005272951.3(GJA5);XM_011509415.1(GJA5);
GO:0086053	AV node cell to bundle of His cell communication by electrical coupling	biological_process	4	35266	4	98659	0	0	2.79757	NM_005266.6(GJA5);NM_181703.3(GJA5);XM_005272951.3(GJA5);XM_011509415.1(GJA5);
GO:0086054	bundle of His cell to Purkinje myocyte communication by electrical coupling	biological_process	4	35266	4	98659	0	0	2.79757	NM_005266.6(GJA5);NM_181703.3(GJA5);XM_005272951.3(GJA5);XM_011509415.1(GJA5);
GO:0086077	gap junction channel activity involved in AV node cell-bundle of His cell electrical coupling	molecular_function	4	35266	4	98659	0	0	2.79757	NM_005266.6(GJA5);NM_181703.3(GJA5);XM_005272951.3(GJA5);XM_011509415.1(GJA5);
GO:0098905	regulation of bundle of His cell action potential	biological_process	4	35266	4	98659	0	0	2.79757	NM_005266.6(GJA5);NM_181703.3(GJA5);XM_005272951.3(GJA5);XM_011509415.1(GJA5);
GO:0098906	regulation of Purkinje myocyte action potential	biological_process	4	35266	4	98659	0	0	2.79757	NM_005266.6(GJA5);NM_181703.3(GJA5);XM_005272951.3(GJA5);XM_011509415.1(GJA5);
GO:1900133	regulation of renin secretion into blood stream	biological_process	4	35266	4	98659	0	0	2.79757	NM_005266.6(GJA5);NM_181703.3(GJA5);XM_005272951.3(GJA5);XM_011509415.1(GJA5);
GO:1990029	vasomotion	biological_process	4	35266	4	98659	0	0	2.79757	NM_005266.6(GJA5);NM_181703.3(GJA5);XM_005272951.3(GJA5);XM_011509415.1(GJA5);
GO:0021508	floor plate formation	biological_process	8	35266	8	98659	0	0	2.79757	NM_005270.4(GLI2);XM_006712422.1(GLI2);XM_011510969.1(GLI2);XM_011510970.1(GLI2);XM_011510971.1(GLI2);XM_011510972.1(GLI2);XM_011510973.1(GLI2);XM_011510974.1(GLI2);
GO:0019046	release from viral latency	biological_process	11	35266	11	98659	0	0	2.79757	NM_005334.2(HCFC1);NM_006368.4(CREB3);XM_006724815.1(HCFC1);XM_006724816.1(HCFC1);XM_011531144.1(HCFC1);XM_011531145.1(HCFC1);XM_011531146.1(HCFC1);XM_011531147.1(HCFC1);XM_011531148.1(HCFC1);XM_011531149.1(HCFC1);XM_011531150.1(HCFC1);
GO:1902380	positive regulation of endoribonuclease activity	biological_process	1	35266	1	98659	0	0	2.79757	NM_005345.5(HSPA1A);
GO:1904722	positive regulation of mRNA endonucleolytic cleavage involved in unfolded protein response	biological_process	1	35266	1	98659	0	0	2.79757	NM_005345.5(HSPA1A);
GO:0051296	establishment of meiotic spindle orientation	biological_process	1	35266	1	98659	0	0	2.79757	NM_005372.1(MOS);
GO:1902103	negative regulation of metaphase/anaphase transition of meiotic cell cycle	biological_process	1	35266	1	98659	0	0	2.79757	NM_005372.1(MOS);
GO:0038164	thrombopoietin receptor activity	molecular_function	2	35266	2	98659	0	0	2.79757	NM_005373.2(MPL);XM_011541478.1(MPL);
GO:0051427	hormone receptor binding	molecular_function	4	35266	4	98659	0	0	2.79757	NM_005417.4(SRC);NM_198291.2(SRC);XM_011529013.1(SRC);XM_011529014.1(SRC);
GO:2001286	regulation of caveolin-mediated endocytosis	biological_process	4	35266	4	98659	0	0	2.79757	NM_005417.4(SRC);NM_198291.2(SRC);XM_011529013.1(SRC);XM_011529014.1(SRC);
GO:0060825	fibroblast growth factor receptor signaling pathway involved in neural plate anterior/posterior pattern formation	biological_process	1	35266	1	98659	0	0	2.79757	NM_005450.4(NOG);
GO:0090193	positive regulation of glomerulus development	biological_process	1	35266	1	98659	0	0	2.79757	NM_005450.4(NOG);
GO:2000313	regulation of fibroblast growth factor receptor signaling pathway involved in neural plate anterior/posterior pattern formation	biological_process	1	35266	1	98659	0	0	2.79757	NM_005450.4(NOG);
GO:0044302	dentate gyrus mossy fiber	cellular_component	2	35266	2	98659	0	0	2.79757	NM_005456.3(MAPK8IP1);XM_005253226.2(MAPK8IP1);
GO:0006043	glucosamine catabolic process	biological_process	4	35266	4	98659	0	0	2.79757	NM_005471.4(GNPDA1);XM_005268348.1(GNPDA1);XM_006714747.2(GNPDA1);XM_011537537.1(GNPDA1);
GO:0002476	antigen processing and presentation of endogenous peptide antigen via MHC class Ib	biological_process	1	35266	1	98659	0	0	2.79757	NM_005516.5(HLA-E);
GO:0002715	regulation of natural killer cell mediated immunity	biological_process	1	35266	1	98659	0	0	2.79757	NM_005516.5(HLA-E);
GO:0032398	MHC class Ib protein complex	cellular_component	1	35266	1	98659	0	0	2.79757	NM_005516.5(HLA-E);
GO:0032759	positive regulation of TRAIL production	biological_process	1	35266	1	98659	0	0	2.79757	NM_005516.5(HLA-E);
GO:0036037	CD8-positive, alpha-beta T cell activation	biological_process	1	35266	1	98659	0	0	2.79757	NM_005516.5(HLA-E);
GO:0018153	isopeptide cross-linking via N6-(L-isoglutamyl)-L-lysine	biological_process	2	35266	2	98659	0	0	2.79757	NM_005547.2(IVL);XM_006711300.2(IVL);
GO:0005221	intracellular cyclic nucleotide activated cation channel activity	molecular_function	1	35266	1	98659	0	0	2.79757	NM_005549.2(KCNA10);
GO:0061474	phagolysosome membrane	cellular_component	3	35266	3	98659	0	0	2.79757	NM_005561.3(LAMP1);XM_011537494.1(LAMP1);XM_011537495.1(LAMP1);
GO:0001705	ectoderm formation	biological_process	2	35266	2	98659	0	0	2.79757	NM_005568.4(LHX1);XM_011546810.1(LHX1);
GO:0021937	cerebellar Purkinje cell-granule cell precursor cell signaling involved in regulation of granule cell precursor cell proliferation	biological_process	3	35266	3	98659	0	0	2.79757	NM_005568.4(LHX1);NM_022363.2(LHX5);XM_011546810.1(LHX1);
GO:0035846	oviduct epithelium development	biological_process	2	35266	2	98659	0	0	2.79757	NM_005568.4(LHX1);XM_011546810.1(LHX1);
GO:0035847	uterine epithelium development	biological_process	2	35266	2	98659	0	0	2.79757	NM_005568.4(LHX1);XM_011546810.1(LHX1);
GO:0035849	nephric duct elongation	biological_process	2	35266	2	98659	0	0	2.79757	NM_005568.4(LHX1);XM_011546810.1(LHX1);
GO:0035852	horizontal cell localization	biological_process	2	35266	2	98659	0	0	2.79757	NM_005568.4(LHX1);XM_011546810.1(LHX1);
GO:0072077	renal vesicle morphogenesis	biological_process	2	35266	2	98659	0	0	2.79757	NM_005568.4(LHX1);XM_011546810.1(LHX1);
GO:0072283	metanephric renal vesicle morphogenesis	biological_process	2	35266	2	98659	0	0	2.79757	NM_005568.4(LHX1);XM_011546810.1(LHX1);
GO:0034358	plasma lipoprotein particle	cellular_component	1	35266	1	98659	0	0	2.79757	NM_005577.2(LPA);
GO:0021688	cerebellar molecular layer formation	biological_process	5	35266	5	98659	0	0	2.79757	NM_005618.3(DLL1);XM_005266934.2(DLL1);XM_006725014.2(DLL1);XM_011535758.1(DLL1);XM_011546480.1(DLL1);
GO:0048631	regulation of skeletal muscle tissue growth	biological_process	5	35266	5	98659	0	0	2.79757	NM_005618.3(DLL1);XM_005266934.2(DLL1);XM_006725014.2(DLL1);XM_011535758.1(DLL1);XM_011546480.1(DLL1);
GO:0060853	Notch signaling pathway involved in arterial endothelial cell fate commitment	biological_process	5	35266	5	98659	0	0	2.79757	NM_005618.3(DLL1);XM_005266934.2(DLL1);XM_006725014.2(DLL1);XM_011535758.1(DLL1);XM_011546480.1(DLL1);
GO:0098773	skin epidermis development	biological_process	5	35266	5	98659	0	0	2.79757	NM_005618.3(DLL1);XM_005266934.2(DLL1);XM_006725014.2(DLL1);XM_011535758.1(DLL1);XM_011546480.1(DLL1);
GO:0007371	ventral midline determination	biological_process	2	35266	2	98659	0	0	2.79757	NM_005631.4(SMO);XM_011516522.1(SMO);
GO:0021910	smoothened signaling pathway involved in ventral spinal cord patterning	biological_process	2	35266	2	98659	0	0	2.79757	NM_005631.4(SMO);XM_011516522.1(SMO);
GO:0051799	negative regulation of hair follicle development	biological_process	2	35266	2	98659	0	0	2.79757	NM_005631.4(SMO);XM_011516522.1(SMO);
GO:0060248	detection of cell density by contact stimulus involved in contact inhibition	biological_process	2	35266	2	98659	0	0	2.79757	NM_005631.4(SMO);XM_011516522.1(SMO);
GO:0072285	mesenchymal to epithelial transition involved in metanephric renal vesicle formation	biological_process	2	35266	2	98659	0	0	2.79757	NM_005631.4(SMO);XM_011516522.1(SMO);
GO:2000826	regulation of heart morphogenesis	biological_process	2	35266	2	98659	0	0	2.79757	NM_005631.4(SMO);XM_011516522.1(SMO);
GO:0045523	interleukin-27 receptor binding	molecular_function	4	35266	4	98659	0	0	2.79757	NM_005755.2(EBI3);NM_145659.3(IL27);XM_011527619.1(EBI3);XM_011545780.1(IL27);
GO:0035851	Krueppel-associated box domain binding	molecular_function	1	35266	1	98659	0	0	2.79757	NM_005762.2(TRIM28);
GO:0086103	G-protein coupled receptor signaling pathway involved in heart process	biological_process	2	35266	2	98659	0	0	2.79757	NM_005856.2(RAMP3);XM_006715631.2(RAMP3);
GO:0090101	negative regulation of transmembrane receptor protein serine/threonine kinase signaling pathway	biological_process	1	35266	1	98659	0	0	2.79757	NM_005860.2(FSTL3);
GO:0008352	katanin complex	cellular_component	6	35266	6	98659	0	0	2.79757	NM_005886.2(KATNB1);XM_005255772.3(KATNB1);XM_006721121.2(KATNB1);XM_006721122.2(KATNB1);XM_006721123.2(KATNB1);XM_011522810.1(KATNB1);
GO:0016480	negative regulation of transcription from RNA polymerase III promoter	biological_process	7	35266	7	98659	0	0	2.79757	NM_005967.3(NAB2);NM_012094.4(PRDX5);NM_032272.4(MAF1);NM_181651.2(PRDX5);NM_181652.2(PRDX5);XM_005268894.2(NAB2);XM_005273882.3(PRDX5);
GO:0021610	facial nerve morphogenesis	biological_process	1	35266	1	98659	0	0	2.79757	NM_005982.3(SIX1);
GO:0061197	fungiform papilla morphogenesis	biological_process	3	35266	3	98659	0	0	2.79757	NM_005982.3(SIX1);NM_017420.4(SIX4);XM_005267759.1(SIX4);
GO:0072172	mesonephric tubule formation	biological_process	1	35266	1	98659	0	0	2.79757	NM_005982.3(SIX1);
GO:0060806	negative regulation of cell differentiation involved in embryonic placenta development	biological_process	1	35266	1	98659	0	0	2.79757	NM_005985.3(SNAI1);
GO:0097152	mesenchymal cell apoptotic process	biological_process	5	35266	5	98659	0	0	2.79757	NM_005992.1(TBX1);NM_080646.1(TBX1);NM_080647.1(TBX1);XM_006724312.1(TBX1);XM_011530351.1(TBX1);
GO:2000027	regulation of organ morphogenesis	biological_process	5	35266	5	98659	0	0	2.79757	NM_005992.1(TBX1);NM_080646.1(TBX1);NM_080647.1(TBX1);XM_006724312.1(TBX1);XM_011530351.1(TBX1);
GO:0060560	developmental growth involved in morphogenesis	biological_process	5	35266	5	98659	0	0	2.79757	NM_005994.3(TBX2);NM_058238.2(WNT7B);XM_011525158.1(TBX2);XM_011525159.1(TBX2);XM_011530366.1(WNT7B);
GO:1901208	negative regulation of heart looping	biological_process	3	35266	3	98659	0	0	2.79757	NM_005994.3(TBX2);XM_011525158.1(TBX2);XM_011525159.1(TBX2);
GO:1901211	negative regulation of cardiac chamber formation	biological_process	3	35266	3	98659	0	0	2.79757	NM_005994.3(TBX2);XM_011525158.1(TBX2);XM_011525159.1(TBX2);
GO:0003167	atrioventricular bundle cell differentiation	biological_process	2	35266	2	98659	0	0	2.79757	NM_005996.3(TBX3);NM_016569.3(TBX3);
GO:0046884	follicle-stimulating hormone secretion	biological_process	2	35266	2	98659	0	0	2.79757	NM_005996.3(TBX3);NM_016569.3(TBX3);
GO:0003205	cardiac chamber development	biological_process	2	35266	2	98659	0	0	2.79757	NM_006015.4(ARID1A);NM_139135.2(ARID1A);
GO:0042766	nucleosome mobilization	biological_process	2	35266	2	98659	0	0	2.79757	NM_006015.4(ARID1A);NM_139135.2(ARID1A);
GO:0033871	[heparan sulfate]-glucosamine 3-sulfotransferase 2 activity	molecular_function	3	35266	3	98659	0	0	2.79757	NM_006043.1(HS3ST2);XM_011546001.1(HS3ST2);XM_011546002.1(HS3ST2);
GO:0001607	neuromedin U receptor activity	molecular_function	9	35266	9	98659	0	0	2.79757	NM_006056.4(NMUR1);NM_020167.4(NMUR2);XM_006712195.2(NMUR1);XM_006712196.2(NMUR1);XM_011510487.1(NMUR1);XM_011510488.1(NMUR1);XM_011510489.1(NMUR1);XM_011537669.1(NMUR2);XM_011537670.1(NMUR2);
GO:0071926	endocannabinoid signaling pathway	biological_process	4	35266	4	98659	0	0	2.79757	NM_006133.2(DAGLA);XM_005274230.3(DAGLA);XM_011545235.1(DAGLA);XM_011545236.1(DAGLA);
GO:0045105	intermediate filament polymerization or depolymerization	biological_process	1	35266	1	98659	0	0	2.79757	NM_006158.4(NEFL);
GO:1903935	response to sodium arsenite	biological_process	3	35266	3	98659	0	0	2.79757	NM_006158.4(NEFL);NM_021076.3(NEFH);XM_011530200.1(NEFH);
GO:0045872	positive regulation of rhodopsin gene expression	biological_process	13	35266	13	98659	0	0	2.79757	NM_006177.3(NRL);NM_014249.3(NR2E3);NM_016346.3(NR2E3);XM_005267708.3(NRL);XM_005267709.3(NRL);XM_005267710.3(NRL);XM_011521146.1(NR2E3);XM_011536801.1(NRL);XM_011536802.1(NRL);XM_011536803.1(NRL);XM_011536804.1(NRL);XM_011536805.1(NRL);XM_011536806.1(NRL);
GO:0005018	platelet-derived growth factor alpha-receptor activity	molecular_function	6	35266	6	98659	0	0	2.79757	NM_006206.4(PDGFRA);XM_005265743.1(PDGFRA);XM_006714039.2(PDGFRA);XM_006714041.2(PDGFRA);XM_011534385.1(PDGFRA);XM_011534386.1(PDGFRA);
GO:0035790	platelet-derived growth factor receptor-alpha signaling pathway	biological_process	6	35266	6	98659	0	0	2.79757	NM_006206.4(PDGFRA);XM_005265743.1(PDGFRA);XM_006714039.2(PDGFRA);XM_006714041.2(PDGFRA);XM_011534385.1(PDGFRA);XM_011534386.1(PDGFRA);
GO:2000739	regulation of mesenchymal stem cell differentiation	biological_process	6	35266	6	98659	0	0	2.79757	NM_006206.4(PDGFRA);XM_005265743.1(PDGFRA);XM_006714039.2(PDGFRA);XM_006714041.2(PDGFRA);XM_011534385.1(PDGFRA);XM_011534386.1(PDGFRA);
GO:0072227	metanephric macula densa development	biological_process	1	35266	1	98659	0	0	2.79757	NM_006236.1(POU3F3);
GO:0072236	metanephric loop of Henle development	biological_process	3	35266	3	98659	0	0	2.79757	NM_006236.1(POU3F3);NM_058238.2(WNT7B);XM_011530366.1(WNT7B);
GO:0072240	metanephric DCT cell differentiation	biological_process	1	35266	1	98659	0	0	2.79757	NM_006236.1(POU3F3);
GO:0002521	leukocyte differentiation	biological_process	1	35266	1	98659	0	0	2.79757	NM_006270.3(RRAS);
GO:2000549	positive regulation of dendritic cell dendrite assembly	biological_process	1	35266	1	98659	0	0	2.79757	NM_006274.2(CCL19);
GO:2000326	negative regulation of ligand-dependent nuclear receptor transcription coactivator activity	biological_process	1	35266	1	98659	0	0	2.79757	NM_006368.4(CREB3);
GO:0018400	peptidyl-proline hydroxylation to 3-hydroxy-L-proline	biological_process	1	35266	1	98659	0	0	2.79757	NM_006371.4(CRTAP);
GO:0019747	regulation of isoprenoid metabolic process	biological_process	1	35266	1	98659	0	0	2.79757	NM_006432.3(NPC2);
GO:0009159	deoxyribonucleoside monophosphate catabolic process	biological_process	2	35266	2	98659	0	0	2.79757	NM_006443.2(DNPH1);NM_199184.1(DNPH1);
GO:0050144	nucleoside deoxyribosyltransferase activity	molecular_function	2	35266	2	98659	0	0	2.79757	NM_006443.2(DNPH1);NM_199184.1(DNPH1);
GO:0070694	deoxyribonucleoside 5'-monophosphate N-glycosidase activity	molecular_function	2	35266	2	98659	0	0	2.79757	NM_006443.2(DNPH1);NM_199184.1(DNPH1);
GO:0042910	xenobiotic transporter activity	molecular_function	1	35266	1	98659	0	0	2.79757	NM_006516.2(SLC2A1);
GO:0010092	specification of organ identity	biological_process	1	35266	1	98659	0	0	2.79757	NM_006593.2(TBR1);
GO:0030844	positive regulation of intermediate filament depolymerization	biological_process	1	35266	1	98659	0	0	2.79757	NM_006617.1(NES);
GO:0034647	histone demethylase activity (H3-trimethyl-K4 specific)	molecular_function	7	35266	7	98659	0	0	2.79757	NM_006618.3(KDM5B);XM_011509087.1(KDM5B);XM_011509088.1(KDM5B);XM_011509089.1(KDM5B);XM_011509090.1(KDM5B);XM_011509091.1(KDM5B);XM_011509092.1(KDM5B);
GO:0034721	histone H3-K4 demethylation, trimethyl-H3-K4-specific	biological_process	7	35266	7	98659	0	0	2.79757	NM_006618.3(KDM5B);XM_011509087.1(KDM5B);XM_011509088.1(KDM5B);XM_011509089.1(KDM5B);XM_011509090.1(KDM5B);XM_011509091.1(KDM5B);XM_011509092.1(KDM5B);
GO:2000864	regulation of estradiol secretion	biological_process	7	35266	7	98659	0	0	2.79757	NM_006618.3(KDM5B);XM_011509087.1(KDM5B);XM_011509088.1(KDM5B);XM_011509089.1(KDM5B);XM_011509090.1(KDM5B);XM_011509091.1(KDM5B);XM_011509092.1(KDM5B);
GO:0021658	rhombomere 3 morphogenesis	biological_process	1	35266	1	98659	0	0	2.79757	NM_006735.3(HOXA2);
GO:0034632	retinol transporter activity	molecular_function	1	35266	1	98659	0	0	2.79757	NM_006744.3(RBP4);
GO:0034633	retinol transport	biological_process	1	35266	1	98659	0	0	2.79757	NM_006744.3(RBP4);
GO:0035651	AP-3 adaptor complex binding	molecular_function	3	35266	3	98659	0	0	2.79757	NM_006834.3(RAB32);NM_018425.3(PI4K2A);NM_022337.2(RAB38);
GO:0036461	BLOC-2 complex binding	molecular_function	2	35266	2	98659	0	0	2.79757	NM_006834.3(RAB32);NM_022337.2(RAB38);
GO:0070570	regulation of neuron projection regeneration	biological_process	3	35266	3	98659	0	0	2.79757	NM_006902.4(PRRX1);NM_022716.3(PRRX1);XM_006711388.2(PRRX1);
GO:0031315	extrinsic component of mitochondrial outer membrane	cellular_component	2	35266	2	98659	0	0	2.79757	NM_006941.3(SOX10);NM_015077.3(SARM1);
GO:0021692	cerebellar Purkinje cell layer morphogenesis	biological_process	7	35266	7	98659	0	0	2.79757	NM_006946.2(SPTBN2);XM_005274192.3(SPTBN2);XM_005274193.3(SPTBN2);XM_006718669.2(SPTBN2);XM_006718671.2(SPTBN2);XM_011545216.1(SPTBN2);XM_011545217.1(SPTBN2);
GO:0009673	low-affinity phosphate transmembrane transporter activity	molecular_function	1	35266	1	98659	0	0	2.79757	NM_007037.4(ADAMTS8);
GO:0035800	deubiquitinase activator activity	molecular_function	1	35266	1	98659	0	0	2.79757	NM_007126.3(VCP);
GO:0072389	flavin adenine dinucleotide catabolic process	biological_process	1	35266	1	98659	0	0	2.79757	NM_007126.3(VCP);
GO:1903006	positive regulation of protein K63-linked deubiquitination	biological_process	1	35266	1	98659	0	0	2.79757	NM_007126.3(VCP);
GO:1903007	positive regulation of Lys63-specific deubiquitinase activity	biological_process	1	35266	1	98659	0	0	2.79757	NM_007126.3(VCP);
GO:0051125	regulation of actin nucleation	biological_process	1	35266	1	98659	0	0	2.79757	NM_007127.2(VIL1);
GO:0060327	cytoplasmic actin-based contraction involved in cell motility	biological_process	3	35266	3	98659	0	0	2.79757	NM_007127.2(VIL1);XM_005270002.2(KIAA1598);XM_006717931.2(KIAA1598);
GO:2000392	regulation of lamellipodium morphogenesis	biological_process	1	35266	1	98659	0	0	2.79757	NM_007127.2(VIL1);
GO:0046525	xylosylprotein 4-beta-galactosyltransferase activity	molecular_function	4	35266	4	98659	0	0	2.79757	NM_007255.2(B4GALT7);XM_005265805.2(B4GALT7);XM_006714816.2(B4GALT7);XM_011534421.1(B4GALT7);
GO:0097604	temperature-gated cation channel activity	molecular_function	4	35266	4	98659	0	0	2.79757	NM_007332.2(TRPA1);NM_033310.2(KCNK4);XM_011517624.1(TRPA1);XM_011517625.1(TRPA1);
GO:0045210	FasL biosynthetic process	biological_process	1	35266	1	98659	0	0	2.79757	NM_007350.3(PHLDA1);
GO:0001016	RNA polymerase III regulatory region DNA binding	molecular_function	4	35266	4	98659	0	0	2.79757	NM_012094.4(PRDX5);NM_181651.2(PRDX5);NM_181652.2(PRDX5);XM_005273882.3(PRDX5);
GO:0060785	regulation of apoptosis involved in tissue homeostasis	biological_process	4	35266	4	98659	0	0	2.79757	NM_012094.4(PRDX5);NM_181651.2(PRDX5);NM_181652.2(PRDX5);XM_005273882.3(PRDX5);
GO:0072541	peroxynitrite reductase activity	molecular_function	4	35266	4	98659	0	0	2.79757	NM_012094.4(PRDX5);NM_181651.2(PRDX5);NM_181652.2(PRDX5);XM_005273882.3(PRDX5);
GO:2001057	reactive nitrogen species metabolic process	biological_process	4	35266	4	98659	0	0	2.79757	NM_012094.4(PRDX5);NM_181651.2(PRDX5);NM_181652.2(PRDX5);XM_005273882.3(PRDX5);
GO:0021767	mammillary body development	biological_process	1	35266	1	98659	0	0	2.79757	NM_012182.2(FOXB1);
GO:0061374	mammillothalamic axonal tract development	biological_process	1	35266	1	98659	0	0	2.79757	NM_012182.2(FOXB1);
GO:0061377	mammary gland lobule development	biological_process	1	35266	1	98659	0	0	2.79757	NM_012182.2(FOXB1);
GO:0061379	inferior colliculus development	biological_process	2	35266	2	98659	0	0	2.79757	NM_012182.2(FOXB1);NM_172238.3(TFAP2D);
GO:0061381	cell migration in diencephalon	biological_process	1	35266	1	98659	0	0	2.79757	NM_012182.2(FOXB1);
GO:0061301	cerebellum vasculature morphogenesis	biological_process	1	35266	1	98659	0	0	2.79757	NM_012193.3(FZD4);
GO:0050080	malonyl-CoA decarboxylase activity	molecular_function	1	35266	1	98659	0	0	2.79757	NM_012213.2(MLYCD);
GO:2001294	malonyl-CoA catabolic process	biological_process	1	35266	1	98659	0	0	2.79757	NM_012213.2(MLYCD);
GO:0003186	tricuspid valve morphogenesis	biological_process	4	35266	4	98659	0	0	2.79757	NM_012259.2(HEY2);XM_005266878.2(HEY2);XM_011535649.1(HEY2);XM_011535650.1(HEY2);
GO:0003195	tricuspid valve formation	biological_process	12	35266	12	98659	0	0	2.79757	NM_012259.2(HEY2);NM_153813.2(ZFPM1);XM_005266878.2(HEY2);XM_011522912.1(ZFPM1);XM_011522913.1(ZFPM1);XM_011522914.1(ZFPM1);XM_011522915.1(ZFPM1);XM_011522916.1(ZFPM1);XM_011522917.1(ZFPM1);XM_011522918.1(ZFPM1);XM_011535649.1(HEY2);XM_011535650.1(HEY2);
GO:2000723	negative regulation of cardiac vascular smooth muscle cell differentiation	biological_process	4	35266	4	98659	0	0	2.79757	NM_012259.2(HEY2);XM_005266878.2(HEY2);XM_011535649.1(HEY2);XM_011535650.1(HEY2);
GO:0019694	alkanesulfonate metabolic process	biological_process	5	35266	5	98659	0	0	2.79757	NM_012289.3(KEAP1);NM_203500.1(KEAP1);XM_005260173.1(KEAP1);XM_005260174.1(KEAP1);XM_011528452.1(KEAP1);
GO:0046958	nonassociative learning	biological_process	4	35266	4	98659	0	0	2.79757	NM_012324.4(MAPK8IP2);XM_011530679.1(MAPK8IP2);XM_011530680.1(MAPK8IP2);XM_011530681.1(MAPK8IP2);
GO:0015136	sialic acid transmembrane transporter activity	molecular_function	1	35266	1	98659	0	0	2.79757	NM_012434.4(SLC17A5);
GO:0015538	sialic acid:proton symporter activity	molecular_function	1	35266	1	98659	0	0	2.79757	NM_012434.4(SLC17A5);
GO:0015739	sialic acid transport	biological_process	1	35266	1	98659	0	0	2.79757	NM_012434.4(SLC17A5);
GO:0046543	development of secondary female sexual characteristics	biological_process	4	35266	4	98659	0	0	2.79757	NM_012448.3(STAT5B);NM_024496.3(IRF2BPL);XM_005257625.2(STAT5B);XM_005257626.3(STAT5B);
GO:0046544	development of secondary male sexual characteristics	biological_process	3	35266	3	98659	0	0	2.79757	NM_012448.3(STAT5B);XM_005257625.2(STAT5B);XM_005257626.3(STAT5B);
GO:0006403	RNA localization	biological_process	2	35266	2	98659	0	0	2.79757	NM_012469.3(PRPF6);XM_006723769.2(PRPF6);
GO:0006238	CMP salvage	biological_process	3	35266	3	98659	0	0	2.79757	NM_012474.4(UCK2);XM_011509969.1(UCK2);XM_011509970.1(UCK2);
GO:0072319	vesicle uncoating	biological_process	1	35266	1	98659	0	0	2.79757	NM_013245.2(VPS4A);
GO:1904896	ESCRT complex disassembly	biological_process	1	35266	1	98659	0	0	2.79757	NM_013245.2(VPS4A);
GO:0017024	myosin I binding	molecular_function	2	35266	2	98659	0	0	2.79757	NM_013258.4(PYCARD);NM_145182.2(PYCARD);
GO:0032803	regulation of low-density lipoprotein particle receptor catabolic process	biological_process	3	35266	3	98659	0	0	2.79757	NM_013262.3(MYLIP);XM_005249032.2(MYLIP);XM_005249033.2(MYLIP);
GO:0050277	sedoheptulokinase activity	molecular_function	1	35266	1	98659	0	0	2.79757	NM_013276.2(SHPK);
GO:0004475	mannose-1-phosphate guanylyltransferase activity	molecular_function	2	35266	2	98659	0	0	2.79757	NM_013334.3(GMPPB);NM_021971.2(GMPPB);
GO:0015727	lactate transport	biological_process	1	35266	1	98659	0	0	2.79757	NM_013356.2(SLC16A8);
GO:0045485	omega-6 fatty acid desaturase activity	molecular_function	2	35266	2	98659	0	0	2.79757	NM_013402.4(FADS1);XM_011545022.1(FADS1);
GO:0048855	adenohypophysis morphogenesis	biological_process	2	35266	2	98659	0	0	2.79757	NM_014080.4(DUOX2);XM_005254421.2(DUOX2);
GO:0071469	cellular response to alkaline pH	biological_process	2	35266	2	98659	0	0	2.79757	NM_014215.2(INSRR);NM_033310.2(KCNK4);
GO:0050313	sulfur dioxygenase activity	molecular_function	4	35266	4	98659	0	0	2.79757	NM_014297.3(ETHE1);XM_005258687.2(ETHE1);XM_005258688.2(ETHE1);XM_011526685.1(ETHE1);
GO:0034213	quinolinate catabolic process	biological_process	3	35266	3	98659	0	0	2.79757	NM_014298.3(QPRT);XM_005255223.2(QPRT);XM_011545778.1(QPRT);
GO:0003972	RNA ligase (ATP) activity	molecular_function	1	35266	1	98659	0	0	2.79757	NM_014306.4(RTCB);
GO:0032058	positive regulation of translational initiation in response to stress	biological_process	1	35266	1	98659	0	0	2.79757	NM_014330.3(PPP1R15A);
GO:0072732	cellular response to calcium ion starvation	biological_process	1	35266	1	98659	0	0	2.79757	NM_014330.3(PPP1R15A);
GO:0090648	response to environmental enrichment	biological_process	1	35266	1	98659	0	0	2.79757	NM_014330.3(PPP1R15A);
GO:1903917	positive regulation of endoplasmic reticulum stress-induced eIF2 alpha dephosphorylation	biological_process	1	35266	1	98659	0	0	2.79757	NM_014330.3(PPP1R15A);
GO:1904308	cellular response to desipramine	biological_process	1	35266	1	98659	0	0	2.79757	NM_014330.3(PPP1R15A);
GO:1904310	cellular response to cordycepin	biological_process	1	35266	1	98659	0	0	2.79757	NM_014330.3(PPP1R15A);
GO:1904312	cellular response to gold(3+)	biological_process	1	35266	1	98659	0	0	2.79757	NM_014330.3(PPP1R15A);
GO:1904314	cellular response to methamphetamine hydrochloride	biological_process	1	35266	1	98659	0	0	2.79757	NM_014330.3(PPP1R15A);
GO:0036458	hepatocyte growth factor binding	molecular_function	2	35266	2	98659	0	0	2.79757	NM_014467.2(SRPX2);XM_005262121.2(SRPX2);
GO:0018192	enzyme active site formation via cysteine modification to L-cysteine persulfide	biological_process	1	35266	1	98659	0	0	2.79757	NM_014484.4(MOCS3);
GO:0042292	URM1 activating enzyme activity	molecular_function	1	35266	1	98659	0	0	2.79757	NM_014484.4(MOCS3);
GO:0061604	molybdopterin-synthase sulfurtransferase activity	molecular_function	1	35266	1	98659	0	0	2.79757	NM_014484.4(MOCS3);
GO:0061605	molybdopterin-synthase adenylyltransferase activity	molecular_function	1	35266	1	98659	0	0	2.79757	NM_014484.4(MOCS3);
GO:0043090	amino acid import	biological_process	5	35266	5	98659	0	0	2.79757	NM_014521.2(SH3BP4);XM_011510891.1(SH3BP4);XM_011510892.1(SH3BP4);XM_011510893.1(SH3BP4);XM_011510894.1(SH3BP4);
GO:1901992	positive regulation of mitotic cell cycle phase transition	biological_process	1	35266	1	98659	0	0	2.79757	NM_014547.4(TMOD3);
GO:0038168	epidermal growth factor receptor signaling pathway via I-kappaB kinase/NF-kappaB cascade	biological_process	6	35266	6	98659	0	0	2.79757	NM_014737.2(RASSF2);NM_170774.1(RASSF2);XM_005260895.3(RASSF2);XM_011529410.1(RASSF2);XM_011529411.1(RASSF2);XM_011529412.1(RASSF2);
GO:0003162	atrioventricular node development	biological_process	3	35266	3	98659	0	0	2.79757	NM_014757.4(MAML1);NM_017617.3(NOTCH1);XM_011518717.1(NOTCH1);
GO:0000246	delta24(24-1) sterol reductase activity	molecular_function	1	35266	1	98659	0	0	2.79757	NM_014762.3(DHCR24);
GO:0050614	delta24-sterol reductase activity	molecular_function	1	35266	1	98659	0	0	2.79757	NM_014762.3(DHCR24);
GO:0002718	regulation of cytokine production involved in immune response	biological_process	1	35266	1	98659	0	0	2.79757	NM_014817.3(TRIL);
GO:0035853	chromosome passenger complex localization to spindle midzone	biological_process	2	35266	2	98659	0	0	2.79757	NM_014851.3(KLHL21);XM_005263542.2(KLHL21);
GO:0070853	myosin VI binding	molecular_function	2	35266	2	98659	0	0	2.79757	NM_014916.3(LMTK2);XM_011515981.1(LMTK2);
GO:0046130	purine ribonucleoside catabolic process	biological_process	1	35266	1	98659	0	0	2.79757	NM_014936.4(ENPP4);
GO:0032506	cytokinetic process	biological_process	4	35266	4	98659	0	0	2.79757	NM_014946.3(SPAST);NM_199436.1(SPAST);XM_005264516.3(SPAST);XM_011533067.1(SPAST);
GO:0051228	mitotic spindle disassembly	biological_process	4	35266	4	98659	0	0	2.79757	NM_014946.3(SPAST);NM_199436.1(SPAST);XM_005264516.3(SPAST);XM_011533067.1(SPAST);
GO:0031549	negative regulation of brain-derived neurotrophic factor receptor signaling pathway	biological_process	6	35266	6	98659	0	0	2.79757	NM_015082.1(FSTL4);XM_011543283.1(FSTL4);XM_011543284.1(FSTL4);XM_011543285.1(FSTL4);XM_011543286.1(FSTL4);XM_011543287.1(FSTL4);
GO:0045075	regulation of interleukin-12 biosynthetic process	biological_process	18	35266	18	98659	0	0	2.79757	NM_015112.2(MAST2);XM_005270652.3(MAST2);XM_005270654.2(MAST2);XM_005270655.3(MAST2);XM_005270656.3(MAST2);XM_006710475.2(MAST2);XM_006710477.2(MAST2);XM_011541059.1(MAST2);XM_011541060.1(MAST2);XM_011541061.1(MAST2);XM_011541062.1(MAST2);XM_011541063.1(MAST2);XM_011541064.1(MAST2);XM_011541065.1(MAST2);XM_011541066.1(MAST2);XM_011541067.1(MAST2);XM_011541068.1(MAST2);XM_011541069.1(MAST2);
GO:0005461	UDP-glucuronic acid transmembrane transporter activity	molecular_function	1	35266	1	98659	0	0	2.79757	NM_015139.2(SLC35D1);
GO:0015787	UDP-glucuronic acid transport	biological_process	1	35266	1	98659	0	0	2.79757	NM_015139.2(SLC35D1);
GO:0000448	cleavage in ITS2 between 5.8S rRNA and LSU-rRNA of tricistronic rRNA transcript (SSU-rRNA, 5.8S rRNA, LSU-rRNA)	biological_process	5	35266	5	98659	0	0	2.79757	NM_015201.4(BOP1);NM_024654.4(NOL9);XM_005263493.2(NOL9);XM_011542146.1(NOL9);XM_011542147.1(NOL9);
GO:1900044	regulation of protein K63-linked ubiquitination	biological_process	8	35266	8	98659	0	0	2.79757	NM_015278.3(SASH1);XM_005266874.3(SASH1);XM_005266875.1(SASH1);XM_006715406.2(SASH1);XM_011535637.1(SASH1);XM_011535638.1(SASH1);XM_011535639.1(SASH1);XM_011535640.1(SASH1);
GO:1902498	regulation of protein autoubiquitination	biological_process	8	35266	8	98659	0	0	2.79757	NM_015278.3(SASH1);XM_005266874.3(SASH1);XM_005266875.1(SASH1);XM_006715406.2(SASH1);XM_011535637.1(SASH1);XM_011535638.1(SASH1);XM_011535639.1(SASH1);XM_011535640.1(SASH1);
GO:1901668	regulation of superoxide dismutase activity	biological_process	8	35266	8	98659	0	0	2.79757	NM_015284.3(SZT2);XM_005270686.2(SZT2);XM_006710501.2(SZT2);XM_011541103.1(SZT2);XM_011541104.1(SZT2);XM_011541105.1(SZT2);XM_011541106.1(SZT2);XM_011541107.1(SZT2);
GO:0001401	mitochondrial sorting and assembly machinery complex	cellular_component	1	35266	1	98659	0	0	2.79757	NM_015380.4(SAMM50);
GO:0032093	SAM domain binding	molecular_function	2	35266	2	98659	0	0	2.79757	NM_015478.6(L3MBTL1);NM_032107.4(L3MBTL1);
GO:0033787	cyanocobalamin reductase (cyanide-eliminating) activity	molecular_function	3	35266	3	98659	0	0	2.79757	NM_015506.2(MMACHC);XM_005270724.3(MMACHC);XM_011541204.1(MMACHC);
GO:0061628	H3K27me3 modified histone binding	molecular_function	1	35266	1	98659	0	0	2.79757	NM_015557.2(CHD5);
GO:0061525	hindgut development	biological_process	8	35266	8	98659	0	0	2.79757	NM_015662.2(IFT172);XM_005264254.1(IFT172);XM_006711986.2(IFT172);XM_006711987.1(IFT172);XM_011532757.1(IFT172);XM_011532758.1(IFT172);XM_011532759.1(IFT172);XM_011532760.1(IFT172);
GO:0031861	prolactin-releasing peptide receptor binding	molecular_function	1	35266	1	98659	0	0	2.79757	NM_015893.1(PRLH);
GO:0006608	snRNP protein import into nucleus	biological_process	1	35266	1	98659	0	0	2.79757	NM_015934.3(NOP58);
GO:0060816	random inactivation of X chromosome	biological_process	2	35266	2	98659	0	0	2.79757	NM_016120.3(RLIM);NM_183353.2(RLIM);
GO:1900095	regulation of dosage compensation by inactivation of X chromosome	biological_process	2	35266	2	98659	0	0	2.79757	NM_016120.3(RLIM);NM_183353.2(RLIM);
GO:0031877	somatostatin receptor binding	molecular_function	4	35266	4	98659	0	0	2.79757	NM_016148.2(SHANK1);XM_006723233.2(SHANK1);XM_011527013.1(SHANK1);XM_011527014.1(SHANK1);
GO:0050894	determination of affect	biological_process	4	35266	4	98659	0	0	2.79757	NM_016148.2(SHANK1);XM_006723233.2(SHANK1);XM_011527013.1(SHANK1);XM_011527014.1(SHANK1);
GO:0070625	zymogen granule exocytosis	biological_process	3	35266	3	98659	0	0	2.79757	NM_016176.3(SDF4);NM_016547.2(SDF4);XM_011541556.1(SDF4);
GO:0070828	heterochromatin organization	biological_process	12	35266	12	98659	0	0	2.79757	NM_016287.3(HP1BP3);NM_030648.2(SETD7);XM_005245875.3(HP1BP3);XM_005245876.3(HP1BP3);XM_005245877.3(HP1BP3);XM_005245878.3(HP1BP3);XM_005245879.3(HP1BP3);XM_011532288.1(SETD7);XM_011541532.1(HP1BP3);XM_011541533.1(HP1BP3);XM_011541534.1(HP1BP3);XM_011541535.1(HP1BP3);
GO:0097298	regulation of nucleus size	biological_process	10	35266	10	98659	0	0	2.79757	NM_016287.3(HP1BP3);XM_005245875.3(HP1BP3);XM_005245876.3(HP1BP3);XM_005245877.3(HP1BP3);XM_005245878.3(HP1BP3);XM_005245879.3(HP1BP3);XM_011541532.1(HP1BP3);XM_011541533.1(HP1BP3);XM_011541534.1(HP1BP3);XM_011541535.1(HP1BP3);
GO:0006386	termination of RNA polymerase III transcription	biological_process	1	35266	1	98659	0	0	2.79757	NM_016310.4(POLR3K);
GO:0090387	phagolysosome assembly involved in apoptotic cell clearance	biological_process	1	35266	1	98659	0	0	2.79757	NM_016322.3(RAB14);
GO:0009000	selenocysteine lyase activity	molecular_function	1	35266	1	98659	0	0	2.79757	NM_016510.5(SCLY);
GO:0008115	sarcosine oxidase activity	molecular_function	1	35266	1	98659	0	0	2.79757	NM_016518.2(PIPOX);
GO:0033514	L-lysine catabolic process to acetyl-CoA via L-pipecolate	biological_process	1	35266	1	98659	0	0	2.79757	NM_016518.2(PIPOX);
GO:0050031	L-pipecolate oxidase activity	molecular_function	1	35266	1	98659	0	0	2.79757	NM_016518.2(PIPOX);
GO:0003011	involuntary skeletal muscle contraction	biological_process	15	35266	15	98659	0	0	2.79757	NM_016529.4(ATP8A2);XM_005266419.1(ATP8A2);XM_011535103.1(ATP8A2);XM_011535104.1(ATP8A2);XM_011535105.1(ATP8A2);XM_011535106.1(ATP8A2);XM_011535107.1(ATP8A2);XM_011535108.1(ATP8A2);XM_011535109.1(ATP8A2);XM_011535110.1(ATP8A2);XM_011535111.1(ATP8A2);XM_011535112.1(ATP8A2);XM_011535113.1(ATP8A2);XM_011535114.1(ATP8A2);XM_011535115.1(ATP8A2);
GO:0021686	cerebellar granular layer maturation	biological_process	1	35266	1	98659	0	0	2.79757	NM_016564.3(CEND1);
GO:0021933	radial glia guided migration of cerebellar granule cell	biological_process	1	35266	1	98659	0	0	2.79757	NM_016564.3(CEND1);
GO:0098528	skeletal muscle fiber differentiation	biological_process	2	35266	2	98659	0	0	2.79757	NM_017420.4(SIX4);XM_005267759.1(SIX4);
GO:0001576	globoside biosynthetic process	biological_process	10	35266	10	98659	0	0	2.79757	NM_017436.4(A4GALT);XM_005261643.1(A4GALT);XM_005261644.1(A4GALT);XM_005261646.3(A4GALT);XM_005261647.1(A4GALT);XM_005261648.2(A4GALT);XM_006724265.2(A4GALT);XM_006724266.2(A4GALT);XM_011530233.1(A4GALT);XM_011530234.1(A4GALT);
GO:0050512	lactosylceramide 4-alpha-galactosyltransferase activity	molecular_function	10	35266	10	98659	0	0	2.79757	NM_017436.4(A4GALT);XM_005261643.1(A4GALT);XM_005261644.1(A4GALT);XM_005261646.3(A4GALT);XM_005261647.1(A4GALT);XM_005261648.2(A4GALT);XM_006724265.2(A4GALT);XM_006724266.2(A4GALT);XM_011530233.1(A4GALT);XM_011530234.1(A4GALT);
GO:0008891	glycolate oxidase activity	molecular_function	1	35266	1	98659	0	0	2.79757	NM_017545.2(HAO1);
GO:0046296	glycolate catabolic process	biological_process	1	35266	1	98659	0	0	2.79757	NM_017545.2(HAO1);
GO:0047969	glyoxylate oxidase activity	molecular_function	1	35266	1	98659	0	0	2.79757	NM_017545.2(HAO1);
GO:0017168	5-oxoprolinase (ATP-hydrolyzing) activity	molecular_function	3	35266	3	98659	0	0	2.79757	NM_017570.4(OPLAH);XM_011516960.1(OPLAH);XM_011516961.1(OPLAH);
GO:0003213	cardiac right atrium morphogenesis	biological_process	2	35266	2	98659	0	0	2.79757	NM_017617.3(NOTCH1);XM_011518717.1(NOTCH1);
GO:0003270	Notch signaling pathway involved in regulation of secondary heart field cardioblast proliferation	biological_process	2	35266	2	98659	0	0	2.79757	NM_017617.3(NOTCH1);XM_011518717.1(NOTCH1);
GO:0007440	foregut morphogenesis	biological_process	2	35266	2	98659	0	0	2.79757	NM_017617.3(NOTCH1);XM_011518717.1(NOTCH1);
GO:0021515	cell differentiation in spinal cord	biological_process	2	35266	2	98659	0	0	2.79757	NM_017617.3(NOTCH1);XM_011518717.1(NOTCH1);
GO:0060768	regulation of epithelial cell proliferation involved in prostate gland development	biological_process	2	35266	2	98659	0	0	2.79757	NM_017617.3(NOTCH1);XM_011518717.1(NOTCH1);
GO:0060843	venous endothelial cell differentiation	biological_process	2	35266	2	98659	0	0	2.79757	NM_017617.3(NOTCH1);XM_011518717.1(NOTCH1);
GO:0060979	vasculogenesis involved in coronary vascular morphogenesis	biological_process	2	35266	2	98659	0	0	2.79757	NM_017617.3(NOTCH1);XM_011518717.1(NOTCH1);
GO:0036090	cleavage furrow ingression	biological_process	3	35266	3	98659	0	0	2.79757	NM_017621.3(ALKBH4);XM_005250464.2(ALKBH4);XM_005250465.2(ALKBH4);
GO:0043390	aflatoxin B1 metabolic process	biological_process	3	35266	3	98659	0	0	2.79757	NM_017781.2(CYP2W1);XM_011515440.1(CYP2W1);XM_011515441.1(CYP2W1);
GO:0036138	peptidyl-histidine hydroxylation	biological_process	3	35266	3	98659	0	0	2.79757	NM_017902.2(HIF1AN);XM_011539940.1(HIF1AN);XM_011539941.1(HIF1AN);
GO:0036139	peptidyl-histidine dioxygenase activity	molecular_function	3	35266	3	98659	0	0	2.79757	NM_017902.2(HIF1AN);XM_011539940.1(HIF1AN);XM_011539941.1(HIF1AN);
GO:0036140	peptidyl-asparagine 3-dioxygenase activity	molecular_function	3	35266	3	98659	0	0	2.79757	NM_017902.2(HIF1AN);XM_011539940.1(HIF1AN);XM_011539941.1(HIF1AN);
GO:0042265	peptidyl-asparagine hydroxylation	biological_process	3	35266	3	98659	0	0	2.79757	NM_017902.2(HIF1AN);XM_011539940.1(HIF1AN);XM_011539941.1(HIF1AN);
GO:0060620	regulation of cholesterol import	biological_process	1	35266	1	98659	0	0	2.79757	NM_017907.2(LAMTOR1);
GO:1990175	EH domain binding	molecular_function	1	35266	1	98659	0	0	2.79757	NM_017957.2(EPN3);
GO:0002085	inhibition of neuroepithelial cell differentiation	biological_process	1	35266	1	98659	0	0	2.79757	NM_018055.4(NODAL);
GO:0010085	polarity specification of proximal/distal axis	biological_process	1	35266	1	98659	0	0	2.79757	NM_018055.4(NODAL);
GO:0033505	floor plate morphogenesis	biological_process	1	35266	1	98659	0	0	2.79757	NM_018055.4(NODAL);
GO:0048327	axial mesodermal cell fate specification	biological_process	1	35266	1	98659	0	0	2.79757	NM_018055.4(NODAL);
GO:0060802	epiblast cell-extraembryonic ectoderm cell signaling involved in anterior/posterior axis specification	biological_process	1	35266	1	98659	0	0	2.79757	NM_018055.4(NODAL);
GO:0090010	transforming growth factor beta receptor signaling pathway involved in primitive streak formation	biological_process	1	35266	1	98659	0	0	2.79757	NM_018055.4(NODAL);
GO:1903371	regulation of endoplasmic reticulum tubular network organization	biological_process	3	35266	3	98659	0	0	2.79757	NM_018126.2(TMEM33);XM_005248116.2(TMEM33);XM_005248117.1(TMEM33);
GO:0070611	histone methyltransferase activity (H3-R2 specific)	molecular_function	1	35266	1	98659	0	0	2.79757	NM_018137.2(PRMT6);
GO:0070612	histone methyltransferase activity (H2A-R3 specific)	molecular_function	1	35266	1	98659	0	0	2.79757	NM_018137.2(PRMT6);
GO:0003952	NAD+ synthase (glutamine-hydrolyzing) activity	molecular_function	1	35266	1	98659	0	0	2.79757	NM_018161.4(NADSYN1);
GO:0046486	glycerolipid metabolic process	biological_process	3	35266	3	98659	0	0	2.79757	NM_018238.3(AGK);XM_005250023.3(AGK);XM_011516397.1(AGK);
GO:0047620	acylglycerol kinase activity	molecular_function	3	35266	3	98659	0	0	2.79757	NM_018238.3(AGK);XM_005250023.3(AGK);XM_011516397.1(AGK);
GO:0046520	sphingoid biosynthetic process	biological_process	4	35266	4	98659	0	0	2.79757	NM_018327.2(SPTLC3);XM_011529278.1(SPTLC3);XM_011529279.1(SPTLC3);XM_011529280.1(SPTLC3);
GO:0008812	choline dehydrogenase activity	molecular_function	6	35266	6	98659	0	0	2.79757	NM_018397.4(CHDH);XM_006713250.2(CHDH);XM_006713251.2(CHDH);XM_006713252.2(CHDH);XM_011533938.1(CHDH);XM_011533939.1(CHDH);
GO:0002561	basophil degranulation	biological_process	1	35266	1	98659	0	0	2.79757	NM_018425.3(PI4K2A);
GO:0035838	growing cell tip	cellular_component	1	35266	1	98659	0	0	2.79757	NM_018425.3(PI4K2A);
GO:0044231	host cell presynaptic membrane	cellular_component	1	35266	1	98659	0	0	2.79757	NM_018425.3(PI4K2A);
GO:0015173	aromatic amino acid transmembrane transporter activity	molecular_function	1	35266	1	98659	0	0	2.79757	NM_018593.4(SLC16A10);
GO:0015801	aromatic amino acid transport	biological_process	1	35266	1	98659	0	0	2.79757	NM_018593.4(SLC16A10);
GO:0031867	EP4 subtype prostaglandin E2 receptor binding	molecular_function	1	35266	1	98659	0	0	2.79757	NM_018708.2(FEM1A);
GO:0001604	urotensin II receptor activity	molecular_function	1	35266	1	98659	0	0	2.79757	NM_018949.2(UTS2R);
GO:0045092	interleukin-18 receptor complex	cellular_component	2	35266	2	98659	0	0	2.79757	NM_019009.3(TOLLIP);XM_011520192.1(TOLLIP);
GO:1900223	positive regulation of beta-amyloid clearance	biological_process	1	35266	1	98659	0	0	2.79757	NM_019112.3(ABCA7);
GO:1901076	positive regulation of engulfment of apoptotic cell	biological_process	1	35266	1	98659	0	0	2.79757	NM_019112.3(ABCA7);
GO:0042941	D-alanine transport	biological_process	1	35266	1	98659	0	0	2.79757	NM_019849.2(SLC7A10);
GO:0039507	suppression by virus of host molecular function	biological_process	4	35266	4	98659	0	0	2.79757	NM_020119.3(ZC3HAV1);NM_024625.3(ZC3HAV1);XM_005250501.1(ZC3HAV1);XM_011516412.1(ZC3HAV1);
GO:0097505	Rad6-Rad18 complex	cellular_component	1	35266	1	98659	0	0	2.79757	NM_020165.3(RAD18);
GO:0042924	neuromedin U binding	molecular_function	3	35266	3	98659	0	0	2.79757	NM_020167.4(NMUR2);XM_011537669.1(NMUR2);XM_011537670.1(NMUR2);
GO:0097401	synaptic vesicle lumen acidification	biological_process	1	35266	1	98659	0	0	2.79757	NM_020309.3(SLC17A7);
GO:0035787	cell migration involved in kidney development	biological_process	4	35266	4	98659	0	0	2.79757	NM_020335.2(VANGL2);XM_005245357.1(VANGL2);XM_011509804.1(VANGL2);XM_011509805.1(VANGL2);
GO:0061346	planar cell polarity pathway involved in heart morphogenesis	biological_process	4	35266	4	98659	0	0	2.79757	NM_020335.2(VANGL2);XM_005245357.1(VANGL2);XM_011509804.1(VANGL2);XM_011509805.1(VANGL2);
GO:0055024	regulation of cardiac muscle tissue development	biological_process	4	35266	4	98659	0	0	2.79757	NM_020433.4(JPH2);NM_175913.3(JPH2);XM_006723832.2(JPH2);XM_006723833.2(JPH2);
GO:0005954	calcium- and calmodulin-dependent protein kinase complex	cellular_component	1	35266	1	98659	0	0	2.79757	NM_020439.2(CAMK1G);
GO:1902884	positive regulation of response to oxidative stress	biological_process	2	35266	2	98659	0	0	2.79757	NM_020451.2(SEPN1);NM_206926.1(SEPN1);
GO:0016844	strictosidine synthase activity	molecular_function	2	35266	2	98659	0	0	2.79757	NM_020531.2(APMAP);XM_005260763.2(APMAP);
GO:0003017	lymph circulation	biological_process	2	35266	2	98659	0	0	2.79757	NM_020733.1(HEG1);XM_005247666.1(HEG1);
GO:0055017	cardiac muscle tissue growth	biological_process	8	35266	8	98659	0	0	2.79757	NM_020733.1(HEG1);NM_080625.3(CCM2L);XM_005247666.1(HEG1);XM_006723706.2(CCM2L);XM_011528566.1(CCM2L);XM_011528567.1(CCM2L);XM_011528568.1(CCM2L);XM_011528569.1(CCM2L);
GO:0005596	collagen type XIV trimer	cellular_component	3	35266	3	98659	0	0	2.79757	NM_021110.2(COL14A1);XM_005251059.2(COL14A1);XM_006716651.2(COL14A1);
GO:1903721	positive regulation of I-kappaB phosphorylation	biological_process	9	35266	9	98659	0	0	2.79757	NM_021138.3(TRAF2);NM_023935.1(DDRGK1);XM_005266099.3(TRAF2);XM_011518973.1(TRAF2);XM_011518974.1(TRAF2);XM_011518975.1(TRAF2);XM_011518976.1(TRAF2);XM_011518977.1(TRAF2);XM_011518978.1(TRAF2);
GO:0071584	negative regulation of zinc ion transmembrane import	biological_process	1	35266	1	98659	0	0	2.79757	NM_021194.2(SLC30A1);
GO:0071585	detoxification of cadmium ion	biological_process	1	35266	1	98659	0	0	2.79757	NM_021194.2(SLC30A1);
GO:1903828	negative regulation of cellular protein localization	biological_process	5	35266	5	98659	0	0	2.79757	NM_021202.1(TP53INP2);XM_005260476.2(TP53INP2);XM_006723841.2(TP53INP2);XM_011528952.1(TP53INP2);XM_011528953.1(TP53INP2);
GO:0060668	regulation of branching involved in salivary gland morphogenesis by extracellular matrix-epithelial cell signaling	biological_process	2	35266	2	98659	0	0	2.79757	NM_021229.3(NTN4);XM_011538629.1(NTN4);
GO:0004904	interferon receptor activity	molecular_function	2	35266	2	98659	0	0	2.79757	NM_021258.3(IL22RA1);XM_011541882.1(IL22RA1);
GO:0070859	positive regulation of bile acid biosynthetic process	biological_process	1	35266	1	98659	0	0	2.79757	NM_021724.4(NR1D1);
GO:0001532	interleukin-21 receptor activity	molecular_function	5	35266	5	98659	0	0	2.79757	NM_021798.3(IL21R);NM_181078.2(IL21R);NM_181079.4(IL21R);XM_011545857.1(IL21R);XM_011545858.1(IL21R);
GO:0038114	interleukin-21-mediated signaling pathway	biological_process	5	35266	5	98659	0	0	2.79757	NM_021798.3(IL21R);NM_181078.2(IL21R);NM_181079.4(IL21R);XM_011545857.1(IL21R);XM_011545858.1(IL21R);
GO:0000963	mitochondrial RNA processing	biological_process	1	35266	1	98659	0	0	2.79757	NM_021826.4(FASTKD5);
GO:2000763	positive regulation of transcription from RNA polymerase II promoter involved in norepinephrine biosynthetic process	biological_process	1	35266	1	98659	0	0	2.79757	NM_021973.2(HAND2);
GO:2000764	positive regulation of semaphorin-plexin signaling pathway involved in outflow tract morphogenesis	biological_process	1	35266	1	98659	0	0	2.79757	NM_021973.2(HAND2);
GO:0051615	histamine uptake	biological_process	1	35266	1	98659	0	0	2.79757	NM_021977.3(SLC22A3);
GO:0031662	positive regulation of cyclin-dependent protein serine/threonine kinase activity involved in G2/M transition of mitotic cell cycle	biological_process	1	35266	1	98659	0	0	2.79757	NM_021979.3(HSPA2);
GO:0070684	seminal clot liquefaction	biological_process	3	35266	3	98659	0	0	2.79757	NM_022046.4(KLK14);XM_011526984.1(KLK14);XM_011526985.1(KLK14);
GO:0070247	regulation of natural killer cell apoptotic process	biological_process	2	35266	2	98659	0	0	2.79757	NM_022161.3(BIRC7);NM_139317.2(BIRC7);
GO:0042586	peptide deformylase activity	molecular_function	1	35266	1	98659	0	0	2.79757	NM_022341.1(PDF);
GO:0010949	negative regulation of intestinal phytosterol absorption	biological_process	2	35266	2	98659	0	0	2.79757	NM_022436.2(ABCG5);NM_022437.2(ABCG8);
GO:0045796	negative regulation of intestinal cholesterol absorption	biological_process	2	35266	2	98659	0	0	2.79757	NM_022436.2(ABCG5);NM_022437.2(ABCG8);
GO:0003142	cardiogenic plate morphogenesis	biological_process	1	35266	1	98659	0	0	2.79757	NM_022454.3(SOX17);
GO:0060807	regulation of transcription from RNA polymerase II promoter involved in definitive endodermal cell fate specification	biological_process	1	35266	1	98659	0	0	2.79757	NM_022454.3(SOX17);
GO:2000043	regulation of cardiac cell fate specification	biological_process	1	35266	1	98659	0	0	2.79757	NM_022454.3(SOX17);
GO:0000414	regulation of histone H3-K36 methylation	biological_process	14	35266	14	98659	0	0	2.79757	NM_022455.4(NSD1);NM_172349.2(NSD1);XM_005265959.1(NSD1);XM_005265960.1(NSD1);XM_005265961.1(NSD1);XM_005265962.3(NSD1);XM_011534610.1(NSD1);XM_011534611.1(NSD1);XM_011534612.1(NSD1);XM_011534613.1(NSD1);XM_011534614.1(NSD1);XM_011534615.1(NSD1);XM_011534616.1(NSD1);XM_011534617.1(NSD1);
GO:0030380	interleukin-17E receptor binding	molecular_function	2	35266	2	98659	0	0	2.79757	NM_022789.3(IL25);NM_172314.1(IL25);
GO:0032616	interleukin-13 production	biological_process	2	35266	2	98659	0	0	2.79757	NM_022789.3(IL25);NM_172314.1(IL25);
GO:0032634	interleukin-5 production	biological_process	2	35266	2	98659	0	0	2.79757	NM_022789.3(IL25);NM_172314.1(IL25);
GO:0019101	female somatic sex determination	biological_process	1	35266	1	98659	0	0	2.79757	NM_023067.3(FOXL2);
GO:0042703	menstruation	biological_process	1	35266	1	98659	0	0	2.79757	NM_023067.3(FOXL2);
GO:0043028	cysteine-type endopeptidase regulator activity involved in apoptotic process	molecular_function	1	35266	1	98659	0	0	2.79757	NM_023067.3(FOXL2);
GO:0000009	alpha-1,6-mannosyltransferase activity	molecular_function	4	35266	4	98659	0	0	2.79757	NM_024105.3(ALG12);XM_011530369.1(ALG12);XM_011530370.1(ALG12);XM_011530371.1(ALG12);
GO:0052917	dol-P-Man:Man(7)GlcNAc(2)-PP-Dol alpha-1,6-mannosyltransferase activity	molecular_function	4	35266	4	98659	0	0	2.79757	NM_024105.3(ALG12);XM_011530369.1(ALG12);XM_011530370.1(ALG12);XM_011530371.1(ALG12);
GO:0003418	growth plate cartilage chondrocyte differentiation	biological_process	2	35266	2	98659	0	0	2.79757	NM_024409.2(NPPC);XM_011511245.1(NPPC);
GO:0051731	polynucleotide 5'-hydroxyl-kinase activity	molecular_function	4	35266	4	98659	0	0	2.79757	NM_024654.4(NOL9);XM_005263493.2(NOL9);XM_011542146.1(NOL9);XM_011542147.1(NOL9);
GO:1901724	positive regulation of cell proliferation involved in kidney development	biological_process	2	35266	2	98659	0	0	2.79757	NM_024674.4(LIN28A);XM_011542148.1(LIN28A);
GO:0008783	agmatinase activity	molecular_function	1	35266	1	98659	0	0	2.79757	NM_024758.4(AGMAT);
GO:0033388	putrescine biosynthetic process from arginine	biological_process	1	35266	1	98659	0	0	2.79757	NM_024758.4(AGMAT);
GO:0047159	1-alkenylglycerophosphocholine O-acyltransferase activity	molecular_function	5	35266	5	98659	0	0	2.79757	NM_024830.3(LPCAT1);XM_005248373.2(LPCAT1);XM_011514132.1(LPCAT1);XM_011514133.1(LPCAT1);XM_011514134.1(LPCAT1);
GO:0047191	1-alkylglycerophosphocholine O-acyltransferase activity	molecular_function	5	35266	5	98659	0	0	2.79757	NM_024830.3(LPCAT1);XM_005248373.2(LPCAT1);XM_011514132.1(LPCAT1);XM_011514133.1(LPCAT1);XM_011514134.1(LPCAT1);
GO:2001246	negative regulation of phosphatidylcholine biosynthetic process	biological_process	5	35266	5	98659	0	0	2.79757	NM_024830.3(LPCAT1);XM_005248373.2(LPCAT1);XM_011514132.1(LPCAT1);XM_011514133.1(LPCAT1);XM_011514134.1(LPCAT1);
GO:0018009	N-terminal peptidyl-L-cysteine N-palmitoylation	biological_process	1	35266	1	98659	0	0	2.79757	NM_024871.2(MAP6D1);
GO:0015368	calcium:cation antiporter activity	molecular_function	1	35266	1	98659	0	0	2.79757	NM_024959.2(SLC8B1);
GO:0086038	calcium:sodium antiporter activity involved in regulation of cardiac muscle cell membrane potential	molecular_function	1	35266	1	98659	0	0	2.79757	NM_024959.2(SLC8B1);
GO:1903936	cellular response to sodium arsenite	biological_process	9	35266	9	98659	0	0	2.79757	NM_025079.2(ZC3H12A);XM_006710925.2(ZC3H12A);XM_006710926.2(ZC3H12A);XM_011542193.1(ZC3H12A);XM_011542194.1(ZC3H12A);XM_011542195.1(ZC3H12A);XM_011542196.1(ZC3H12A);XM_011542197.1(ZC3H12A);XM_011542198.1(ZC3H12A);
GO:1904628	cellular response to phorbol 13-acetate 12-myristate	biological_process	9	35266	9	98659	0	0	2.79757	NM_025079.2(ZC3H12A);XM_006710925.2(ZC3H12A);XM_006710926.2(ZC3H12A);XM_011542193.1(ZC3H12A);XM_011542194.1(ZC3H12A);XM_011542195.1(ZC3H12A);XM_011542196.1(ZC3H12A);XM_011542197.1(ZC3H12A);XM_011542198.1(ZC3H12A);
GO:1990869	cellular response to chemokine	biological_process	9	35266	9	98659	0	0	2.79757	NM_025079.2(ZC3H12A);XM_006710925.2(ZC3H12A);XM_006710926.2(ZC3H12A);XM_011542193.1(ZC3H12A);XM_011542194.1(ZC3H12A);XM_011542195.1(ZC3H12A);XM_011542196.1(ZC3H12A);XM_011542197.1(ZC3H12A);XM_011542198.1(ZC3H12A);
GO:0021935	cerebellar granule cell precursor tangential migration	biological_process	4	35266	4	98659	0	0	2.79757	NM_025179.3(PLXNA2);XM_005273164.2(PLXNA2);XM_005273165.3(PLXNA2);XM_006711387.2(PLXNA2);
GO:0051570	regulation of histone H3-K9 methylation	biological_process	2	35266	2	98659	0	0	2.79757	NM_030648.2(SETD7);XM_011532288.1(SETD7);
GO:0006668	sphinganine-1-phosphate metabolic process	biological_process	2	35266	2	98659	0	0	2.79757	NM_030791.3(SGPP1);XM_006720264.1(SGPP1);
GO:0070780	dihydrosphingosine-1-phosphate phosphatase activity	molecular_function	4	35266	4	98659	0	0	2.79757	NM_030791.3(SGPP1);NM_152386.2(SGPP2);XM_005246297.2(SGPP2);XM_006720264.1(SGPP1);
GO:2001178	positive regulation of mediator complex assembly	biological_process	2	35266	2	98659	0	0	2.79757	NM_030973.3(MED25);XM_011527353.1(MED25);
GO:0000994	RNA polymerase III core binding	molecular_function	1	35266	1	98659	0	0	2.79757	NM_032272.4(MAF1);
GO:0070217	transcription factor TFIIIB complex assembly	biological_process	1	35266	1	98659	0	0	2.79757	NM_032272.4(MAF1);
GO:0010857	calcium-dependent protein kinase activity	molecular_function	1	35266	1	98659	0	0	2.79757	NM_032409.2(PINK1);
GO:1903852	positive regulation of cristae formation	biological_process	1	35266	1	98659	0	0	2.79757	NM_032409.2(PINK1);
GO:1904544	positive regulation of free ubiquitin chain polymerization	biological_process	1	35266	1	98659	0	0	2.79757	NM_032409.2(PINK1);
GO:0051255	spindle midzone assembly	biological_process	5	35266	5	98659	0	0	2.79757	NM_032429.2(LZTS2);XM_005270222.3(LZTS2);XM_005270223.2(LZTS2);XM_005270224.2(LZTS2);XM_006718032.2(LZTS2);
GO:0031151	histone methyltransferase activity (H3-K79 specific)	molecular_function	7	35266	7	98659	0	0	2.79757	NM_032482.2(DOT1L);XM_005259659.2(DOT1L);XM_005259660.2(DOT1L);XM_006722923.2(DOT1L);XM_011528359.1(DOT1L);XM_011528360.1(DOT1L);XM_011528361.1(DOT1L);
GO:0034729	histone H3-K79 methylation	biological_process	7	35266	7	98659	0	0	2.79757	NM_032482.2(DOT1L);XM_005259659.2(DOT1L);XM_005259660.2(DOT1L);XM_006722923.2(DOT1L);XM_011528359.1(DOT1L);XM_011528360.1(DOT1L);XM_011528361.1(DOT1L);
GO:2000677	regulation of transcription regulatory region DNA binding	biological_process	7	35266	7	98659	0	0	2.79757	NM_032482.2(DOT1L);XM_005259659.2(DOT1L);XM_005259660.2(DOT1L);XM_006722923.2(DOT1L);XM_011528359.1(DOT1L);XM_011528360.1(DOT1L);XM_011528361.1(DOT1L);
GO:0009128	purine nucleoside monophosphate catabolic process	biological_process	1	35266	1	98659	0	0	2.79757	NM_032526.2(NT5C1A);
GO:0021814	cell motility involved in cerebral cortex radial glia guided migration	biological_process	13	35266	13	98659	0	0	2.79757	NM_032552.3(DAB2IP);NM_138709.2(DAB2IP);XM_005251719.3(DAB2IP);XM_005251721.1(DAB2IP);XM_005251724.3(DAB2IP);XM_011518264.1(DAB2IP);XM_011518265.1(DAB2IP);XM_011518266.1(DAB2IP);XM_011518267.1(DAB2IP);XM_011518268.1(DAB2IP);XM_011518269.1(DAB2IP);XM_011518270.1(DAB2IP);XM_011518271.1(DAB2IP);
GO:0044301	climbing fiber	cellular_component	13	35266	13	98659	0	0	2.79757	NM_032552.3(DAB2IP);NM_138709.2(DAB2IP);XM_005251719.3(DAB2IP);XM_005251721.1(DAB2IP);XM_005251724.3(DAB2IP);XM_011518264.1(DAB2IP);XM_011518265.1(DAB2IP);XM_011518266.1(DAB2IP);XM_011518267.1(DAB2IP);XM_011518268.1(DAB2IP);XM_011518269.1(DAB2IP);XM_011518270.1(DAB2IP);XM_011518271.1(DAB2IP);
GO:1990032	parallel fiber	cellular_component	13	35266	13	98659	0	0	2.79757	NM_032552.3(DAB2IP);NM_138709.2(DAB2IP);XM_005251719.3(DAB2IP);XM_005251721.1(DAB2IP);XM_005251724.3(DAB2IP);XM_011518264.1(DAB2IP);XM_011518265.1(DAB2IP);XM_011518266.1(DAB2IP);XM_011518267.1(DAB2IP);XM_011518268.1(DAB2IP);XM_011518269.1(DAB2IP);XM_011518270.1(DAB2IP);XM_011518271.1(DAB2IP);
GO:0015216	purine nucleotide transmembrane transporter activity	molecular_function	3	35266	3	98659	0	0	2.79757	NM_032583.3(ABCC11);NM_033151.3(ABCC11);NM_145186.2(ABCC11);
GO:0015865	purine nucleotide transport	biological_process	3	35266	3	98659	0	0	2.79757	NM_032583.3(ABCC11);NM_033151.3(ABCC11);NM_145186.2(ABCC11);
GO:0090210	regulation of establishment of blood-brain barrier	biological_process	5	35266	5	98659	0	0	2.79757	NM_032777.9(ADGRA2);XM_005273471.3(ADGRA2);XM_011544481.1(ADGRA2);XM_011544482.1(ADGRA2);XM_011544483.1(ADGRA2);
GO:0047800	cysteamine dioxygenase activity	molecular_function	1	35266	1	98659	0	0	2.79757	NM_032804.5(ADO);
GO:0005464	UDP-xylose transmembrane transporter activity	molecular_function	1	35266	1	98659	0	0	2.79757	NM_032826.4(SLC35B4);
GO:0015790	UDP-xylose transport	biological_process	1	35266	1	98659	0	0	2.79757	NM_032826.4(SLC35B4);
GO:0005996	monosaccharide metabolic process	biological_process	1	35266	1	98659	0	0	2.79757	NM_033036.2(GAL3ST3);
GO:0030309	poly-N-acetyllactosamine metabolic process	biological_process	1	35266	1	98659	0	0	2.79757	NM_033036.2(GAL3ST3);
GO:0098782	mechanically-gated potassium channel activity	molecular_function	1	35266	1	98659	0	0	2.79757	NM_033310.2(KCNK4);
GO:1900451	positive regulation of glutamate receptor signaling pathway	biological_process	1	35266	1	98659	0	0	2.79757	NM_033517.1(SHANK3);
GO:0005366	myo-inositol:proton symporter activity	molecular_function	1	35266	1	98659	0	0	2.79757	NM_052885.3(SLC2A13);
GO:0035428	hexose transmembrane transport	biological_process	1	35266	1	98659	0	0	2.79757	NM_052885.3(SLC2A13);
GO:0015114	phosphate ion transmembrane transporter activity	molecular_function	2	35266	2	98659	0	0	2.79757	NM_054027.4(ANKH);XM_011514067.1(ANKH);
GO:0030504	inorganic diphosphate transmembrane transporter activity	molecular_function	2	35266	2	98659	0	0	2.79757	NM_054027.4(ANKH);XM_011514067.1(ANKH);
GO:0016332	establishment or maintenance of polarity of embryonic epithelium	biological_process	2	35266	2	98659	0	0	2.79757	NM_058238.2(WNT7B);XM_011530366.1(WNT7B);
GO:0044237	cellular metabolic process	biological_process	2	35266	2	98659	0	0	2.79757	NM_058238.2(WNT7B);XM_011530366.1(WNT7B);
GO:0060482	lobar bronchus development	biological_process	2	35266	2	98659	0	0	2.79757	NM_058238.2(WNT7B);XM_011530366.1(WNT7B);
GO:0072060	outer medullary collecting duct development	biological_process	2	35266	2	98659	0	0	2.79757	NM_058238.2(WNT7B);XM_011530366.1(WNT7B);
GO:0047220	galactosylxylosylprotein 3-beta-galactosyltransferase activity	molecular_function	1	35266	1	98659	0	0	2.79757	NM_080605.3(B3GALT6);
GO:0072674	multinuclear osteoclast differentiation	biological_process	2	35266	2	98659	0	0	2.79757	NM_080721.2(OCSTAMP);XM_011528532.1(OCSTAMP);
GO:0098640	integrin binding involved in cell-matrix adhesion	molecular_function	2	35266	2	98659	0	0	2.79757	NM_130760.2(MADCAM1);NM_130762.2(MADCAM1);
GO:1990108	protein linear deubiquitination	biological_process	5	35266	5	98659	0	0	2.79757	NM_138348.4(OTULIN);XM_011514151.1(OTULIN);XM_011514152.1(OTULIN);XM_011514153.1(OTULIN);XM_011514154.1(OTULIN);
GO:0044317	rod spherule	cellular_component	1	35266	1	98659	0	0	2.79757	NM_138393.1(REEP6);
GO:1900477	negative regulation of G1/S transition of mitotic cell cycle by negative regulation of transcription from RNA polymerase II promoter	biological_process	2	35266	2	98659	0	0	2.79757	NM_144653.4(NACC2);XM_011518221.1(NACC2);
GO:0050201	fucokinase activity	molecular_function	10	35266	10	98659	0	0	2.79757	NM_145059.2(FUK);XM_006721161.1(FUK);XM_006721162.1(FUK);XM_006721164.1(FUK);XM_011522928.1(FUK);XM_011522929.1(FUK);XM_011522930.1(FUK);XM_011522931.1(FUK);XM_011522932.1(FUK);XM_011522933.1(FUK);
GO:0048389	intermediate mesoderm development	biological_process	2	35266	2	98659	0	0	2.79757	NM_145260.2(OSR1);XM_006711942.2(OSR1);
GO:0072111	cell proliferation involved in kidney development	biological_process	2	35266	2	98659	0	0	2.79757	NM_145260.2(OSR1);XM_006711942.2(OSR1);
GO:0072143	mesangial cell development	biological_process	2	35266	2	98659	0	0	2.79757	NM_145260.2(OSR1);XM_006711942.2(OSR1);
GO:0072168	specification of anterior mesonephric tubule identity	biological_process	2	35266	2	98659	0	0	2.79757	NM_145260.2(OSR1);XM_006711942.2(OSR1);
GO:0072169	specification of posterior mesonephric tubule identity	biological_process	2	35266	2	98659	0	0	2.79757	NM_145260.2(OSR1);XM_006711942.2(OSR1);
GO:0072183	negative regulation of nephron tubule epithelial cell differentiation	biological_process	2	35266	2	98659	0	0	2.79757	NM_145260.2(OSR1);XM_006711942.2(OSR1);
GO:0072184	renal vesicle progenitor cell differentiation	biological_process	2	35266	2	98659	0	0	2.79757	NM_145260.2(OSR1);XM_006711942.2(OSR1);
GO:0072234	metanephric nephron tubule development	biological_process	2	35266	2	98659	0	0	2.79757	NM_145260.2(OSR1);XM_006711942.2(OSR1);
GO:0072239	metanephric glomerulus vasculature development	biological_process	2	35266	2	98659	0	0	2.79757	NM_145260.2(OSR1);XM_006711942.2(OSR1);
GO:0072259	metanephric interstitial fibroblast development	biological_process	2	35266	2	98659	0	0	2.79757	NM_145260.2(OSR1);XM_006711942.2(OSR1);
GO:0072268	pattern specification involved in metanephros development	biological_process	2	35266	2	98659	0	0	2.79757	NM_145260.2(OSR1);XM_006711942.2(OSR1);
GO:0090094	metanephric cap mesenchymal cell proliferation involved in metanephros development	biological_process	2	35266	2	98659	0	0	2.79757	NM_145260.2(OSR1);XM_006711942.2(OSR1);
GO:0045625	regulation of T-helper 1 cell differentiation	biological_process	2	35266	2	98659	0	0	2.79757	NM_145659.3(IL27);XM_011545780.1(IL27);
GO:0071299	cellular response to vitamin A	biological_process	1	35266	1	98659	0	0	2.79757	NM_145867.1(LTC4S);
GO:0030817	regulation of cAMP biosynthetic process	biological_process	1	35266	1	98659	0	0	2.79757	NM_148962.4(OXER1);
GO:0050646	5-oxo-6E,8Z,11Z,14Z-icosatetraenoic acid binding	molecular_function	1	35266	1	98659	0	0	2.79757	NM_148962.4(OXER1);
GO:0050647	5-hydroxy-6E,8Z,11Z,14Z-icosatetraenoic acid binding	molecular_function	1	35266	1	98659	0	0	2.79757	NM_148962.4(OXER1);
GO:0050648	5(S)-hydroxyperoxy-6E,8Z,11Z,14Z-icosatetraenoic acid binding	molecular_function	1	35266	1	98659	0	0	2.79757	NM_148962.4(OXER1);
GO:0001582	detection of chemical stimulus involved in sensory perception of sweet taste	biological_process	3	35266	3	98659	0	0	2.79757	NM_152228.1(TAS1R3);NM_152232.2(TAS1R2);XM_011542239.1(TAS1R3);
GO:0033041	sweet taste receptor activity	molecular_function	3	35266	3	98659	0	0	2.79757	NM_152228.1(TAS1R3);NM_152232.2(TAS1R2);XM_011542239.1(TAS1R3);
GO:1903767	sweet taste receptor complex	cellular_component	3	35266	3	98659	0	0	2.79757	NM_152228.1(TAS1R3);NM_152232.2(TAS1R2);XM_011542239.1(TAS1R3);
GO:0048787	presynaptic active zone membrane	cellular_component	2	35266	2	98659	0	0	2.79757	NM_152280.4(SYT11);XM_005245014.1(SYT11);
GO:0070722	Tle3-Aes complex	cellular_component	4	35266	4	98659	0	0	2.79757	NM_152380.2(TBX15);XM_005271161.2(TBX15);XM_005271162.1(TBX15);XM_011542052.1(TBX15);
GO:0050480	imidazolonepropionase activity	molecular_function	1	35266	1	98659	0	0	2.79757	NM_152435.2(AMDHD1);
GO:0038101	sequestering of nodal from receptor via nodal binding	biological_process	1	35266	1	98659	0	0	2.79757	NM_152654.2(DAND5);
GO:0046380	N-acetylneuraminate biosynthetic process	biological_process	1	35266	1	98659	0	0	2.79757	NM_152667.2(NANP);
GO:0050124	N-acylneuraminate-9-phosphatase activity	molecular_function	1	35266	1	98659	0	0	2.79757	NM_152667.2(NANP);
GO:0003991	acetylglutamate kinase activity	molecular_function	3	35266	3	98659	0	0	2.79757	NM_153006.2(NAGS);XM_011524438.1(NAGS);XM_011524439.1(NAGS);
GO:0004042	acetyl-CoA:L-glutamate N-acetyltransferase activity	molecular_function	3	35266	3	98659	0	0	2.79757	NM_153006.2(NAGS);XM_011524438.1(NAGS);XM_011524439.1(NAGS);
GO:0060404	axonemal microtubule depolymerization	biological_process	4	35266	4	98659	0	0	2.79757	NM_153209.3(KIF19);XM_005257029.1(KIF19);XM_005257030.1(KIF19);XM_011524297.1(KIF19);
GO:0070462	plus-end specific microtubule depolymerization	biological_process	4	35266	4	98659	0	0	2.79757	NM_153209.3(KIF19);XM_005257029.1(KIF19);XM_005257030.1(KIF19);XM_011524297.1(KIF19);
GO:0071908	determination of intestine left/right asymmetry	biological_process	1	35266	1	98659	0	0	2.79757	NM_153240.4(NPHP3);
GO:0071909	determination of stomach left/right asymmetry	biological_process	1	35266	1	98659	0	0	2.79757	NM_153240.4(NPHP3);
GO:2000167	regulation of planar cell polarity pathway involved in neural tube closure	biological_process	1	35266	1	98659	0	0	2.79757	NM_153240.4(NPHP3);
GO:0014717	regulation of satellite cell activation involved in skeletal muscle regeneration	biological_process	1	35266	1	98659	0	0	2.79757	NM_153368.2(GJD4);
GO:0043487	regulation of RNA stability	biological_process	2	35266	2	98659	0	0	2.79757	NM_153447.4(NLRP5);XM_011526444.1(NLRP5);
GO:0004835	tubulin-tyrosine ligase activity	molecular_function	3	35266	3	98659	0	0	2.79757	NM_153712.4(TTL);XM_005263599.2(TTL);XM_011510665.1(TTL);
GO:0002295	T-helper cell lineage commitment	biological_process	8	35266	8	98659	0	0	2.79757	NM_153813.2(ZFPM1);XM_011522912.1(ZFPM1);XM_011522913.1(ZFPM1);XM_011522914.1(ZFPM1);XM_011522915.1(ZFPM1);XM_011522916.1(ZFPM1);XM_011522917.1(ZFPM1);XM_011522918.1(ZFPM1);
GO:0045403	negative regulation of interleukin-4 biosynthetic process	biological_process	8	35266	8	98659	0	0	2.79757	NM_153813.2(ZFPM1);XM_011522912.1(ZFPM1);XM_011522913.1(ZFPM1);XM_011522914.1(ZFPM1);XM_011522915.1(ZFPM1);XM_011522916.1(ZFPM1);XM_011522917.1(ZFPM1);XM_011522918.1(ZFPM1);
GO:0060377	negative regulation of mast cell differentiation	biological_process	8	35266	8	98659	0	0	2.79757	NM_153813.2(ZFPM1);XM_011522912.1(ZFPM1);XM_011522913.1(ZFPM1);XM_011522914.1(ZFPM1);XM_011522915.1(ZFPM1);XM_011522916.1(ZFPM1);XM_011522917.1(ZFPM1);XM_011522918.1(ZFPM1);
GO:1990512	Cry-Per complex	cellular_component	2	35266	2	98659	0	0	2.79757	NM_173493.2(PASD1);XM_011531102.1(PASD1);
GO:0003311	pancreatic D cell differentiation	biological_process	2	35266	2	98659	0	0	2.79757	NM_173560.3(RFX6);XM_011535589.1(RFX6);
GO:0090104	pancreatic epsilon cell differentiation	biological_process	2	35266	2	98659	0	0	2.79757	NM_173560.3(RFX6);XM_011535589.1(RFX6);
GO:0047408	alkenylglycerophosphocholine hydrolase activity	molecular_function	1	35266	1	98659	0	0	2.79757	NM_173804.4(TMEM86B);
GO:0047409	alkenylglycerophosphoethanolamine hydrolase activity	molecular_function	1	35266	1	98659	0	0	2.79757	NM_173804.4(TMEM86B);
GO:0070287	ferritin receptor activity	molecular_function	1	35266	1	98659	0	0	2.79757	NM_173833.5(SCARA5);
GO:0014036	neural crest cell fate specification	biological_process	1	35266	1	98659	0	0	2.79757	NM_173849.2(GSC);
GO:0097476	spinal cord motor neuron migration	biological_process	1	35266	1	98659	0	0	2.79757	NM_175747.2(OLIG3);
GO:0030372	high molecular weight B cell growth factor receptor binding	molecular_function	4	35266	4	98659	0	0	2.79757	NM_175852.3(TXLNA);XM_006710424.1(TXLNA);XM_011540931.1(TXLNA);XM_011540932.1(TXLNA);
GO:0070553	nicotinic acid receptor activity	molecular_function	1	35266	1	98659	0	0	2.79757	NM_177551.3(HCAR2);
GO:1990697	protein depalmitoleylation	biological_process	2	35266	2	98659	0	0	2.79757	NM_178493.5(NOTUM);XM_011523537.1(NOTUM);
GO:1990699	palmitoleyl hydrolase activity	molecular_function	2	35266	2	98659	0	0	2.79757	NM_178493.5(NOTUM);XM_011523537.1(NOTUM);
GO:0017188	aspartate N-acetyltransferase activity	molecular_function	1	35266	1	98659	0	0	2.79757	NM_178557.3(NAT8L);
GO:0035755	cardiolipin hydrolase activity	molecular_function	1	35266	1	98659	0	0	2.79757	NM_178836.3(PLD6);
GO:0034703	cation channel complex	cellular_component	1	35266	1	98659	0	0	2.79757	NM_181536.1(PKD1L3);
GO:2000632	negative regulation of pre-miRNA processing	biological_process	1	35266	1	98659	0	0	2.79757	NM_181708.2(BCDIN3D);
GO:0021509	roof plate formation	biological_process	1	35266	1	98659	0	0	2.79757	NM_182828.2(GDF7);
GO:2001051	positive regulation of tendon cell differentiation	biological_process	1	35266	1	98659	0	0	2.79757	NM_182828.2(GDF7);
GO:0071629	cytoplasm-associated proteasomal ubiquitin-dependent protein catabolic process	biological_process	2	35266	2	98659	0	0	2.79757	NM_194460.2(RNF126);XM_005259594.1(RNF126);
GO:0031854	orexigenic neuropeptide QRFP receptor binding	molecular_function	1	35266	1	98659	0	0	2.79757	NM_198180.1(QRFP);
GO:0071072	negative regulation of phospholipid biosynthetic process	biological_process	1	35266	1	98659	0	0	2.79757	NM_198580.2(SLC27A1);
GO:0010430	fatty acid omega-oxidation	biological_process	3	35266	3	98659	0	0	2.79757	NM_207352.3(CYP4V2);XM_005262935.2(CYP4V2);XM_006714184.2(CYP4V2);
GO:0061163	endoplasmic reticulum polarization	biological_process	2	35266	2	98659	0	0	2.79757	XM_005270002.2(KIAA1598);XM_006717931.2(KIAA1598);
GO:0061573	actin filament bundle retrograde transport	biological_process	2	35266	2	98659	0	0	2.79757	XM_005270002.2(KIAA1598);XM_006717931.2(KIAA1598);
GO:0004371	glycerone kinase activity	molecular_function	14	35266	14	98659	0	0	2.79757	XM_011544910.1(DAK);XM_011544911.1(DAK);XM_011544912.1(DAK);XM_011544913.1(DAK);XM_011544914.1(DAK);XM_011544915.1(DAK);XM_011544916.1(DAK);XM_011544917.1(DAK);XM_011544918.1(DAK);XM_011544919.1(DAK);XM_011544920.1(DAK);XM_011544921.1(DAK);XM_011544922.1(DAK);XM_011544923.1(DAK);
GO:0034012	FAD-AMP lyase (cyclizing) activity	molecular_function	14	35266	14	98659	0	0	2.79757	XM_011544910.1(DAK);XM_011544911.1(DAK);XM_011544912.1(DAK);XM_011544913.1(DAK);XM_011544914.1(DAK);XM_011544915.1(DAK);XM_011544916.1(DAK);XM_011544917.1(DAK);XM_011544918.1(DAK);XM_011544919.1(DAK);XM_011544920.1(DAK);XM_011544921.1(DAK);XM_011544922.1(DAK);XM_011544923.1(DAK);
GO:0050354	triokinase activity	molecular_function	14	35266	14	98659	0	0	2.79757	XM_011544910.1(DAK);XM_011544911.1(DAK);XM_011544912.1(DAK);XM_011544913.1(DAK);XM_011544914.1(DAK);XM_011544915.1(DAK);XM_011544916.1(DAK);XM_011544917.1(DAK);XM_011544918.1(DAK);XM_011544919.1(DAK);XM_011544920.1(DAK);XM_011544921.1(DAK);XM_011544922.1(DAK);XM_011544923.1(DAK);
GO:0043547	positive regulation of GTPase activity	biological_process	1989	35266	4010	98659	2.04e-75	1.77e-74	1.38762	NM_000014.4(A2M);NM_000141.4(FGFR2);NM_000142.4(FGFR3);NM_000160.4(GCGR);NM_000201.2(ICAM1);NM_000215.3(JAK3);NM_000267.3(NF1);NM_000276.3(OCRL);NM_000347.5(SPTB);NM_000390.2(CHM);NM_000395.2(CSF2RB);NM_000417.2(IL2RA);NM_000459.4(TEK);NM_000548.3(TSC2);NM_000615.6(NCAM1);NM_000741.3(CHRM4);NM_000835.4(GRIN2C);NM_000836.2(GRIN2D);NM_000878.3(IL2RB);NM_000899.4(KITLG);NM_000960.3(PTGIR);NM_0010016…
P1);XM_011524061.1(RABEP1);XM_011524101.1(SGSM2);XM_011524102.1(SGSM2);XM_011524103.1(SGSM2);XM_011524104.1(SGSM2);XM_011524106.1(SGSM2);XM_011524107.1(SGSM2);XM_011524171.1(TBC1D3K);XM_011524172.1(TBC1D3K);XM_011524173.1(TBC1D3K);XM_011524174.1(TBC1D3K);XM_011524176.1(LOC101060389);XM_011524182.1(LOC102724862);XM_011524183.1(LOC102724862);XM_011524184.1(LOC102724862);XM_011524185.1(LOC102724862)…
GO:0018393	internal peptidyl-lysine acetylation	biological_process	170	35266	175	98659	2.01e-70	1.73e-69	2.71764	NM_001098534.1(BAG6);NM_001199697.1(BAG6);NM_001199698.1(BAG6);NM_001429.3(EP300);NM_004639.3(BAG6);NM_080702.2(BAG6);NM_080703.2(BAG6);XM_006715192.1(BAG6);XM_006715198.1(BAG6);XM_006715201.1(BAG6);XM_006715203.1(BAG6);XM_006724165.2(EP300);XM_006725509.1(BAG6);XM_006725515.1(BAG6);XM_006725518.1(BAG6);XM_006725520.1(BAG6);XM_006725725.1(BAG6);XM_006725729.1(BAG6);XM_006725731.1(BAG6);XM_0067257…
GO:0071816	tail-anchored membrane protein insertion into ER membrane	biological_process	170	35266	177	98659	8.69e-68	7.51e-67	2.68693	NM_001098534.1(BAG6);NM_001199697.1(BAG6);NM_001199698.1(BAG6);NM_004639.3(BAG6);NM_014235.4(UBL4A);NM_015949.2(GET4);NM_080702.2(BAG6);NM_080703.2(BAG6);XM_006715192.1(BAG6);XM_006715198.1(BAG6);XM_006715201.1(BAG6);XM_006715203.1(BAG6);XM_006725509.1(BAG6);XM_006725515.1(BAG6);XM_006725518.1(BAG6);XM_006725520.1(BAG6);XM_006725725.1(BAG6);XM_006725729.1(BAG6);XM_006725731.1(BAG6);XM_006725734.1…
GO:0051787	misfolded protein binding	molecular_function	184	35266	204	98659	1.06e-60	9.11e-60	2.5233	NM_000113.2(TOR1A);NM_000505.3(F12);NM_001098534.1(BAG6);NM_001199697.1(BAG6);NM_001199698.1(BAG6);NM_004639.3(BAG6);NM_006044.2(HDAC6);NM_014674.2(EDEM1);NM_022044.2(SDF2L1);NM_080702.2(BAG6);NM_080703.2(BAG6);XM_005272564.2(HDAC6);XM_005272565.1(HDAC6);XM_005272566.2(HDAC6);XM_005272568.1(HDAC6);XM_006713424.2(EDEM1);XM_006713425.2(EDEM1);XM_006715192.1(BAG6);XM_006715198.1(BAG6);XM_006715201.1…
GO:0035023	regulation of Rho protein signal transduction	biological_process	462	35266	715	98659	3.02e-56	2.6e-55	1.80766	NM_001001669.2(ARHGEF37);NM_001001715.3(FARP1);NM_001010927.2(TIAM2);NM_001011722.2(ARHGEF10L);NM_001024660.3(KALRN);NM_001042663.1(PLEKHG5);NM_001042664.1(PLEKHG5);NM_001042665.1(PLEKHG5);NM_001080479.2(ARHGEF28);NM_001092.4(ABR);NM_001098623.2(OBSCN);NM_001111270.2(ARHGEF25);NM_001112732.2(MCF2L);NM_001113511.1(ARHGEF7);NM_001113512.1(ARHGEF7);NM_001113513.1(ARHGEF7);NM_001114090.1(NGEF);NM_001…
GO:0043022	ribosome binding	molecular_function	297	35266	407	98659	1.43e-53	1.23e-52	2.04147	NM_001025091.1(ABCF1);NM_001079533.1(CPEB1);NM_001079534.1(CPEB1);NM_001079535.1(CPEB1);NM_001090.2(ABCF1);NM_001098534.1(BAG6);NM_001099692.1(EIF5AL1);NM_001143761.1(EIF5A);NM_001177381.1(CPEB2);NM_001177382.1(CPEB2);NM_001177383.1(CPEB2);NM_001177384.1(CPEB2);NM_001178137.1(CPEB3);NM_001199659.2(LETM2);NM_001199660.2(LETM2);NM_001199697.1(BAG6);NM_001199698.1(BAG6);NM_001243689.1(LETMD1);NM_001…
GO:0045861	negative regulation of proteolysis	biological_process	193	35266	229	98659	8.25e-53	7.11e-52	2.35777	NM_000086.2(CLN3);NM_000099.3(CST3);NM_000100.3(CSTB);NM_000207.2(INS);NM_001014431.1(AKT1);NM_001014432.1(AKT1);NM_001042432.1(CLN3);NM_001098534.1(BAG6);NM_001185097.1(INS);NM_001185098.1(INS);NM_001199697.1(BAG6);NM_001199698.1(BAG6);NM_001286104.1(CLN3);NM_001286105.1(CLN3);NM_001286109.1(CLN3);NM_001286110.1(CLN3);NM_001288614.1(CST3);NM_001291897.1(INS);NM_001899.2(CST4);NM_004639.3(BAG6);N…
GO:0005089	Rho guanyl-nucleotide exchange factor activity	molecular_function	420	35266	648	98659	7.66e-52	6.6e-51	1.81324	NM_001001669.2(ARHGEF37);NM_001001715.3(FARP1);NM_001010927.2(TIAM2);NM_001011722.2(ARHGEF10L);NM_001024660.3(KALRN);NM_001042663.1(PLEKHG5);NM_001042664.1(PLEKHG5);NM_001042665.1(PLEKHG5);NM_001080479.2(ARHGEF28);NM_001092.4(ABR);NM_001098623.2(OBSCN);NM_001111270.2(ARHGEF25);NM_001112732.2(MCF2L);NM_001113511.1(ARHGEF7);NM_001113512.1(ARHGEF7);NM_001113513.1(ARHGEF7);NM_001114090.1(NGEF);NM_001…
GO:0030324	lung development	biological_process	336	35266	488	98659	1e-50	8.64e-50	1.92619	NM_000096.3(CP);NM_000141.4(FGFR2);NM_000168.5(GLI3);NM_000192.3(TBX5);NM_000603.4(NOS3);NM_000761.4(CYP1A2);NM_001003652.3(SMAD2);NM_001005291.2(SREBF1);NM_001006624.1(PDPN);NM_001006625.1(PDPN);NM_001025366.2(VEGFA);NM_001025367.2(VEGFA);NM_001025368.2(VEGFA);NM_001025369.2(VEGFA);NM_001025370.2(VEGFA);NM_001033756.2(VEGFA);NM_001081461.1(JMJD6);NM_001098534.1(BAG6);NM_001106.3(ACVR2B);NM_00113…
GO:1990381	ubiquitin-specific protease binding	molecular_function	179	35266	214	98659	3.58e-48	3.08e-47	2.34002	NM_001098534.1(BAG6);NM_001134671.2(DERL1);NM_001144.5(AMFR);NM_001199697.1(BAG6);NM_001199698.1(BAG6);NM_004639.3(BAG6);NM_007126.3(VCP);NM_014706.3(SART3);NM_024295.5(DERL1);NM_032431.2(SYVN1);NM_080702.2(BAG6);NM_080703.2(BAG6);NM_172230.2(SYVN1);XM_005255889.2(AMFR);XM_005255890.2(AMFR);XM_006715192.1(BAG6);XM_006715198.1(BAG6);XM_006715201.1(BAG6);XM_006715203.1(BAG6);XM_006725509.1(BAG6);XM…
GO:0005886	plasma membrane	cellular_component	8232	35266	20535	98659	5.02e-48	4.31e-47	1.12148	NM_000024.5(ADRB2);NM_000025.2(ADRB3);NM_000037.3(ANK1);NM_000054.4(AVPR2);NM_000068.3(CACNA1A);NM_000069.2(CACNA1S);NM_000080.3(CHRNE);NM_000085.4(CLCNKB);NM_000086.2(CLN3);NM_000101.3(CYBA);NM_000109.3(DMD);NM_000112.3(SLC26A2);NM_000132.3(F8);NM_000141.4(FGFR2);NM_000142.4(FGFR3);NM_000145.3(FSHR);NM_000160.4(GCGR);NM_000164.2(GIPR);NM_000170.2(GLDC);NM_000175.3(GPI);NM_000177.4(GSN);NM_000201…
1289101.1(PXK);NM_001289125.1(IFNAR2);NM_001289126.1(IFNAR2);NM_001289128.1(IFNAR2);NM_001289135.1(SLIT2);NM_001289136.1(SLIT2);NM_001289158.1(ADGRE3);NM_001289159.1(ADGRE3);NM_001289160.1(MICB);NM_001289161.1(MICB);NM_001289395.1(TULP1);NM_001289789.1(GPI);NM_001289790.1(GPI);NM_001289823.1(FURIN);NM_001289824.1(FURIN);NM_001290072.1(ENPP5);NM_001290073.1(ENPP5);NM_001290077.1(TEK);NM_001290078.…
);NM_181351.4(NCAM1);NM_181359.2(IL6R);NM_181446.2(FSHR);NM_181523.2(PIK3R1);NM_181536.1(PKD1L3);NM_181657.3(LTB4R);NM_181701.3(QSOX2);NM_181789.2(GLDN);NM_181790.1(GPR142);NM_181798.1(KCNQ1);NM_181874.2(GRM7);NM_181882.2(PRX);NM_181885.2(RXFP4);NM_181886.3(UBE2D3);NM_181887.2(UBE2D3);NM_181888.3(UBE2D3);NM_181889.2(UBE2D3);NM_181890.2(UBE2D3);NM_181891.2(UBE2D3);NM_181892.3(UBE2D3);NM_181893.2(U…
06717926.2(PTEN);XM_006717937.2(HPSE2);XM_006717940.2(CDH23);XM_006717942.2(CDH23);XM_006717993.1(CAMK2G);XM_006717995.1(CAMK2G);XM_006717996.1(CAMK2G);XM_006717997.1(CAMK2G);XM_006717998.1(CAMK2G);XM_006717999.2(CAMK2G);XM_006718000.1(CAMK2G);XM_006718056.2(DLG5);XM_006718084.1(RHOBTB1);XM_006718085.1(RHOBTB1);XM_006718209.2(APBB1);XM_006718210.2(APBB1);XM_006718211.1(APBB1);XM_006718212.2(APBB1…
RE2);XM_011523380.1(SPIRE2);XM_011523381.1(SPIRE2);XM_011523382.1(SPIRE2);XM_011523383.1(SPIRE2);XM_011523384.1(SPIRE2);XM_011523420.1(TRADD);XM_011523473.1(BCAR1);XM_011523474.1(BCAR1);XM_011523475.1(BCAR1);XM_011523528.1(RAB40B);XM_011523538.1(FASN);XM_011523539.1(GCGR);XM_011523540.1(GCGR);XM_011523588.1(SECTM1);XM_011523601.1(ASPSCR1);XM_011523602.1(ASPSCR1);XM_011523603.1(ASPSCR1);XM_0115236…
.1(ADGRB2);XM_011541857.1(ADGRB2);XM_011541858.1(ADGRB2);XM_011541859.1(ADGRB2);XM_011541882.1(IL22RA1);XM_011542179.1(KIAA0319L);XM_011542180.1(KIAA0319L);XM_011542181.1(KIAA0319L);XM_011542182.1(KIAA0319L);XM_011542193.1(ZC3H12A);XM_011542194.1(ZC3H12A);XM_011542195.1(ZC3H12A);XM_011542196.1(ZC3H12A);XM_011542197.1(ZC3H12A);XM_011542198.1(ZC3H12A);XM_011542200.1(CPTP);XM_011542202.1(TAS1R1);XM_…
GO:1904294	positive regulation of ERAD pathway	biological_process	176	35266	210	98659	1.17e-47	1.01e-46	2.34463	NM_001033026.1(TMEM259);NM_001098534.1(BAG6);NM_001199697.1(BAG6);NM_001199698.1(BAG6);NM_003940.2(USP13);NM_004639.3(BAG6);NM_033420.3(TMEM259);NM_080702.2(BAG6);NM_080703.2(BAG6);XM_005259675.2(TMEM259);XM_005259676.2(TMEM259);XM_005259677.2(TMEM259);XM_005259678.2(TMEM259);XM_006715192.1(BAG6);XM_006715198.1(BAG6);XM_006715201.1(BAG6);XM_006715203.1(BAG6);XM_006725509.1(BAG6);XM_006725515.1(BA…
GO:1904379	protein localization to cytosolic proteasome complex involved in ERAD pathway	biological_process	168	35266	199	98659	1.68e-46	1.44e-45	2.36177	NM_001098534.1(BAG6);NM_001199697.1(BAG6);NM_001199698.1(BAG6);NM_004639.3(BAG6);NM_080702.2(BAG6);NM_080703.2(BAG6);XM_006715192.1(BAG6);XM_006715198.1(BAG6);XM_006715201.1(BAG6);XM_006715203.1(BAG6);XM_006725509.1(BAG6);XM_006725515.1(BAG6);XM_006725518.1(BAG6);XM_006725520.1(BAG6);XM_006725725.1(BAG6);XM_006725729.1(BAG6);XM_006725731.1(BAG6);XM_006725734.1(BAG6);XM_006725736.1(BAG6);XM_006725…
GO:0070628	proteasome binding	molecular_function	185	35266	228	98659	8.32e-46	7.13e-45	2.26996	NM_001039550.1(DNAJB2);NM_001098534.1(BAG6);NM_001199697.1(BAG6);NM_001199698.1(BAG6);NM_001281437.1(ADRM1);NM_001281438.1(ADRM1);NM_002165.3(ID1);NM_002800.4(PSMB9);NM_003940.2(USP13);NM_004639.3(BAG6);NM_006736.5(DNAJB2);NM_007002.3(ADRM1);NM_080702.2(BAG6);NM_080703.2(BAG6);NM_175573.2(ADRM1);NM_181353.2(ID1);XM_005260257.1(ADRM1);XM_006715192.1(BAG6);XM_006715198.1(BAG6);XM_006715201.1(BAG6);…
GO:0032435	negative regulation of proteasomal ubiquitin-dependent protein catabolic process	biological_process	213	35266	280	98659	6.64e-44	5.69e-43	2.12815	NM_000410.3(HFE);NM_001015048.2(BAG5);NM_001015049.2(BAG5);NM_001098534.1(BAG6);NM_001166243.1(FHIT);NM_001199697.1(BAG6);NM_001199698.1(BAG6);NM_001284333.1(TLK2);NM_001284363.1(TLK2);NM_001293167.1(PANO1);NM_001300749.1(HFE);NM_002012.2(FHIT);NM_003074.3(SMARCC1);NM_004639.3(BAG6);NM_004873.3(BAG5);NM_006852.3(TLK2);NM_021174.5(CCAR2);NM_080702.2(BAG6);NM_080703.2(BAG6);NM_139006.2(HFE);NM_1390…
GO:0051015	actin filament binding	molecular_function	486	35266	818	98659	7.4e-44	6.34e-43	1.66212	NM_000260.3(MYO7A);NM_000347.5(SPTB);NM_000724.3(CACNB2);NM_001005386.2(ACTR2);NM_001010866.3(TMEM201);NM_001014436.2(DBNL);NM_001024858.2(SPTB);NM_001024959.2(ARPC4);NM_001039141.2(TRIOBP);NM_001039583.1(PICK1);NM_001039584.1(PICK1);NM_001040113.1(MYH11);NM_001040114.1(MYH11);NM_001077182.2(FSCN2);NM_001077186.1(MYH14);NM_001080529.2(WIPF3);NM_001105237.2(CORO1C);NM_001110556.1(FLNA);NM_00112295…
GO:0008017	microtubule binding	molecular_function	754	35266	1414	98659	2.18e-42	1.86e-41	1.49177	NM_000311.3(PRNP);NM_000381.3(MID1);NM_001005290.3(PSRC1);NM_001005360.2(DNM2);NM_001005361.2(DNM2);NM_001005362.2(DNM2);NM_001013406.1(KRIT1);NM_001014380.2(KATNAL1);NM_001032291.2(PSRC1);NM_001033602.2(MTUS2);NM_001039535.2(SKA1);NM_001039592.1(SPAG8);NM_001080121.1(PRNP);NM_001080122.1(PRNP);NM_001080435.2(WHAMM);NM_001098511.2(KIF2A);NM_001098624.2(MID1);NM_001099293.1(KIF4B);NM_001099433.1(J…
GO:0051056	regulation of small GTPase mediated signal transduction	biological_process	619	35266	1115	98659	4.64e-42	3.97e-41	1.55309	NM_000014.4(A2M);NM_000276.3(OCRL);NM_000548.3(TSC2);NM_001010927.2(TIAM2);NM_001024660.3(KALRN);NM_001025201.3(CHN1);NM_001025598.1(ARHGAP30);NM_001033117.2(SRGAP3);NM_001042663.1(PLEKHG5);NM_001042664.1(PLEKHG5);NM_001042665.1(PLEKHG5);NM_001077183.1(TSC2);NM_001077242.1(DEPDC7);NM_001092.4(ABR);NM_001098623.2(OBSCN);NM_001100398.1(RAP1GAP2);NM_001112732.2(MCF2L);NM_001113490.1(AMOT);NM_0011135…
GO:0031593	polyubiquitin binding	molecular_function	210	35266	283	98659	2.06e-40	1.76e-39	2.07593	NM_000028.2(AGL);NM_000642.2(AGL);NM_000643.2(AGL);NM_000644.2(AGL);NM_000645.2(AGL);NM_000646.2(AGL);NM_001039550.1(DNAJB2);NM_001098534.1(BAG6);NM_001161527.1(TNIP2);NM_001199697.1(BAG6);NM_001199698.1(BAG6);NM_001292016.1(TNIP2);NM_001304342.1(UBQLN4);NM_001981.2(EPS15);NM_002810.2(PSMD4);NM_004639.3(BAG6);NM_006044.2(HDAC6);NM_006736.5(DNAJB2);NM_007126.3(VCP);NM_013438.4(UBQLN1);NM_020131.4(…
GO:0030018	Z disc	cellular_component	499	35266	867	98659	9.34e-40	7.98e-39	1.61013	NM_000037.3(ANK1);NM_000109.3(DMD);NM_000257.3(MYH7);NM_000335.4(SCN5A);NM_000342.3(SLC4A1);NM_000620.4(NOS1);NM_000719.6(CACNA1C);NM_000944.4(PPP3CA);NM_001018100.4(MYZAP);NM_001035.2(RYR2);NM_001080116.1(LDB3);NM_001098623.2(OBSCN);NM_001099404.1(SCN5A);NM_001099405.1(SCN5A);NM_001112800.1(SLC8A1);NM_001112801.1(SLC8A1);NM_001112802.1(SLC8A1);NM_001122853.2(MYOZ3);NM_001127487.1(FLNC);NM_001127…
GO:0005085	guanyl-nucleotide exchange factor activity	molecular_function	501	35266	875	98659	4.37e-39	3.73e-38	1.60181	NM_000160.4(GCGR);NM_000741.3(CHRM4);NM_000960.3(PTGIR);NM_001010927.2(TIAM2);NM_001013657.2(GDPGP1);NM_001024660.3(KALRN);NM_001034116.1(EIF2B4);NM_001042368.2(RALGDS);NM_001042663.1(PLEKHG5);NM_001042664.1(PLEKHG5);NM_001042665.1(PLEKHG5);NM_001060.5(TBXA2R);NM_001080479.2(ARHGEF28);NM_001092.4(ABR);NM_001098531.2(RAPGEF3);NM_001098623.2(OBSCN);NM_001098670.1(RASGRP2);NM_001098671.1(RASGRP2);NM…
GO:0005096	GTPase activator activity	molecular_function	1047	35266	2128	98659	3.91e-38	3.34e-37	1.37643	NM_000014.4(A2M);NM_000267.3(NF1);NM_000276.3(OCRL);NM_000390.2(CHM);NM_000548.3(TSC2);NM_001010927.2(TIAM2);NM_001015002.1(LLGL2);NM_001024660.3(KALRN);NM_001025201.3(CHN1);NM_001025598.1(ARHGAP30);NM_001031803.1(LLGL2);NM_001033117.2(SRGAP3);NM_001037131.2(AGAP1);NM_001039467.1(RGS19);NM_001039948.3(SGSM1);NM_001042492.2(NF1);NM_001042535.2(AGAP3);NM_001077183.1(TSC2);NM_001077242.1(DEPDC7);NM_…
GO:0070059	intrinsic apoptotic signaling pathway in response to endoplasmic reticulum stress	biological_process	239	35266	345	98659	2.15e-37	1.83e-36	1.93802	NM_000633.2(BCL2);NM_001098534.1(BAG6);NM_001142776.1(CHAC1);NM_001146156.1(GSK3B);NM_001160.2(APAF1);NM_001199697.1(BAG6);NM_001199698.1(BAG6);NM_001225.3(CASP4);NM_001256627.1(BRSK2);NM_001256629.1(BRSK2);NM_001256630.1(BRSK2);NM_001282218.1(BRSK2);NM_001285878.1(CEBPB);NM_001285879.1(CEBPB);NM_001301188.1(TRIB3);NM_001301190.1(TRIB3);NM_001301193.1(TRIB3);NM_001301196.1(TRIB3);NM_001301201.1(T…
GO:0005515	protein binding	molecular_function	19143	35266	50892	98659	4.92e-37	4.19e-36	1.0523	NM_000014.4(A2M);NM_000023.2(SGCA);NM_000024.5(ADRB2);NM_000025.2(ADRB3);NM_000028.2(AGL);NM_000029.3(AGT);NM_000030.2(AGXT);NM_000033.3(ABCD1);NM_000034.3(ALDOA);NM_000037.3(ANK1);NM_000044.3(AR);NM_000048.3(ASL);NM_000050.4(ASS1);NM_000053.3(ATP7B);NM_000054.4(AVPR2);NM_000068.3(CACNA1A);NM_000069.2(CACNA1S);NM_000071.2(CBS);NM_000076.2(CDKN1C);NM_000077.4(CDKN2A);NM_000086.2(CLN3);NM_000088.3(…
BP1);NM_001161344.1(CHFR);NM_001161345.1(CHFR);NM_001161346.1(CHFR);NM_001161347.1(CHFR);NM_001161352.1(KCNMA1);NM_001161353.1(KCNMA1);NM_001161357.1(FCHO1);NM_001161358.1(FCHO1);NM_001161359.1(FCHO1);NM_001161403.1(LIMS2);NM_001161404.1(LIMS2);NM_001161440.2(PTPRH);NM_001161441.1(SH2D2A);NM_001161442.1(SH2D2A);NM_001161443.1(SH2D2A);NM_001161444.1(SH2D2A);NM_001161521.1(KLHL2);NM_001161522.1(KLH…
1280552.1(PAX5);NM_001280553.1(PAX5);NM_001280554.1(PAX5);NM_001280555.1(PAX5);NM_001280556.1(PAX5);NM_001280794.2(EPHB6);NM_001280795.2(EPHB6);NM_001280796.1(GLS2);NM_001280797.1(GLS2);NM_001280798.1(GLS2);NM_001281435.1(MAP2K4);NM_001281437.1(ADRM1);NM_001281438.1(ADRM1);NM_001281447.1(GTF2IRD2);NM_001281453.1(MBD3);NM_001281454.1(MBD3);NM_001281463.1(SMC1A);NM_001281469.1(PTGDR);NM_001281473.1…
);NM_004949.4(DSC2);NM_004952.4(EFNA3);NM_004953.4(EIF4G1);NM_004954.4(MARK2);NM_004956.4(ETV1);NM_004958.3(MTOR);NM_004959.4(NR5A1);NM_004968.3(ICA1);NM_004980.4(KCND3);NM_004983.2(KCNJ9);NM_004984.2(KIF5A);NM_004992.3(MECP2);NM_004994.2(MMP9);NM_004995.3(MMP14);NM_004998.3(MYO1E);NM_005007.3(NFKBIL1);NM_005015.3(OXA1L);NM_005016.5(PCBP2);NM_005018.2(PDCD1);NM_005022.3(PFN1);NM_005026.3(PIK3CD);…
ZNF408);NM_024746.3(HHIPL2);NM_024751.3(GSTCD);NM_024756.2(MMRN2);NM_024776.3(PEAK1);NM_024778.5(LONRF3);NM_024782.2(NHEJ1);NM_024785.2(FAM124B);NM_024791.3(PDZD3);NM_024793.2(CLUAP1);NM_024805.2(RBFA);NM_024807.3(TREML2);NM_024818.3(UBA5);NM_024832.3(RIN3);NM_024850.2(BTNL8);NM_024860.2(SETD6);NM_024864.4(MRM1);NM_024874.4(KIAA0319L);NM_024886.2(C10orf95);NM_024887.3(DHDDS);NM_024889.4(PLEKHS1);…
005247261.2(ZBTB38);XM_005247322.3(PVRL3);XM_005247371.3(GOLGB1);XM_005247372.3(GOLGB1);XM_005247373.1(GOLGB1);XM_005247437.2(KPNA1);XM_005247439.2(KPNA1);XM_005247446.3(LPP);XM_005247450.3(LPP);XM_005247451.3(LPP);XM_005247453.1(LPP);XM_005247530.2(PIK3CB);XM_005247582.3(PARL);XM_005247584.3(PARL);XM_005247654.1(PLSCR4);XM_005247655.1(PLSCR4);XM_005247662.3(SENP7);XM_005247694.2(BCL6);XM_0052477…
05265515.1(POMGNT2);XM_005265516.1(CAMK1);XM_005265517.2(CAMK1);XM_005265526.3(HESX1);XM_005265529.3(LIMD1);XM_005265532.1(SEC22C);XM_005265533.1(SEC22C);XM_005265534.1(SEC22C);XM_005265535.1(SEC22C);XM_005265538.2(LRRFIP2);XM_005265539.2(LRRFIP2);XM_005265540.1(LRRFIP2);XM_005265551.1(LRRFIP2);XM_005265554.2(LRRFIP2);XM_005265583.2(ACVR2B);XM_005265619.1(PSMD6);XM_005265638.1(OXSR1);XM_005265667…
FOXP4);XM_006714992.2(FOXP4);XM_006715036.2(ANKS1A);XM_006715047.2(GABBR1);XM_006715066.1(GMDS);XM_006715076.2(HLA-DOA);XM_006715165.2(SLC22A23);XM_006715175.2(TFAP2A);XM_006715180.2(TRIM26);XM_006715192.1(BAG6);XM_006715198.1(BAG6);XM_006715201.1(BAG6);XM_006715203.1(BAG6);XM_006715215.1(ZKSCAN3);XM_006715216.1(ZKSCAN3);XM_006715218.2(ZKSCAN3);XM_006715219.2(ZKSCAN3);XM_006715232.1(RUNX2);XM_006…
7.1(PASK);XM_011510828.1(PASK);XM_011510829.1(PASK);XM_011510830.1(PASK);XM_011510831.1(PASK);XM_011510832.1(PASK);XM_011510833.1(PASK);XM_011510834.1(PASK);XM_011510835.1(PASK);XM_011510836.1(ATG4B);XM_011510837.1(ATG4B);XM_011510838.1(ATG4B);XM_011510839.1(ATG4B);XM_011510841.1(CLASP1);XM_011510842.1(CLASP1);XM_011510843.1(CLASP1);XM_011510844.1(CLASP1);XM_011510845.1(CLASP1);XM_011510846.1(CLA…
_011519755.1(NRP1);XM_011519756.1(NRP1);XM_011519805.1(NR1H3);XM_011519806.1(NR1H3);XM_011519807.1(NR1H3);XM_011519830.1(TSSC4);XM_011519842.1(DEAF1);XM_011519843.1(DEAF1);XM_011519844.1(TRIM3);XM_011519845.1(TRIM3);XM_011519852.1(CELF1);XM_011519854.1(CELF1);XM_011519856.1(CELF1);XM_011519857.1(CELF1);XM_011519859.1(CELF1);XM_011519928.1(AP2A2);XM_011519929.1(AP2A2);XM_011519930.1(AP2A2);XM_0115…
480.1(NLRP12);XM_011527481.1(NLRP12);XM_011527482.1(NLRP12);XM_011527483.1(NLRP12);XM_011527489.1(NUMBL);XM_011527490.1(NUMBL);XM_011527491.1(TIMM50);XM_011527494.1(DMKN);XM_011527495.1(DMKN);XM_011527496.1(DMKN);XM_011527497.1(DMKN);XM_011527498.1(DMKN);XM_011527499.1(DMKN);XM_011527500.1(DMKN);XM_011527501.1(DMKN);XM_011527502.1(DMKN);XM_011527503.1(DMKN);XM_011527504.1(DMKN);XM_011527505.1(DMK…
535697.1(WDR27);XM_011535726.1(CCDC28A);XM_011535727.1(CCDC28A);XM_011535728.1(CCDC28A);XM_011535753.1(RGS17);XM_011535758.1(DLL1);XM_011535818.1(LIN28B);XM_011535821.1(LAMA4);XM_011535837.1(MAP3K5);XM_011535838.1(MAP3K5);XM_011535839.1(MAP3K5);XM_011535840.1(MLLT4);XM_011535841.1(MLLT4);XM_011535842.1(MLLT4);XM_011535843.1(MLLT4);XM_011535869.1(TFB1M);XM_011535870.1(TFB1M);XM_011535871.1(TFB1M);…
60.1(KIF13B);XM_011544461.1(KIF13B);XM_011544481.1(ADGRA2);XM_011544482.1(ADGRA2);XM_011544483.1(ADGRA2);XM_011544490.1(ANK1);XM_011544491.1(ANK1);XM_011544492.1(ANK1);XM_011544493.1(ANK1);XM_011544494.1(ANK1);XM_011544495.1(ANK1);XM_011544496.1(ANK1);XM_011544497.1(ANK1);XM_011544498.1(ANK1);XM_011544499.1(ANK1);XM_011544500.1(ANK1);XM_011544501.1(ANK1);XM_011544502.1(ANK1);XM_011544503.1(ANK1);…
GO:0005516	calmodulin binding	molecular_function	679	35266	1299	98659	7.86e-35	6.69e-34	1.46232	NM_000218.2(KCNQ1);NM_000257.3(MYH7);NM_000259.3(MYO5A);NM_000260.3(MYO7A);NM_000292.2(PHKA2);NM_000294.2(PHKG2);NM_000335.4(SCN5A);NM_000540.2(RYR1);NM_000603.4(NOS3);NM_000620.4(NOS1);NM_000625.4(NOS2);NM_000719.6(CACNA1C);NM_000932.2(PLCB3);NM_000944.4(PPP3CA);NM_000945.3(PPP3R1);NM_001001331.2(ATP2B2);NM_001001344.2(ATP2B3);NM_001004426.1(PLA2G6);NM_001023570.2(IQCB1);NM_001023571.2(IQCB1);NM…
GO:0007520	myoblast fusion	biological_process	131	35266	160	98659	6.13e-34	5.21e-33	2.29051	NM_000325.5(PITX2);NM_000620.4(NOS1);NM_001005407.1(CACNA1H);NM_001042440.3(CAST);NM_001145909.1(TANC1);NM_001146156.1(GSK3B);NM_001190442.1(CAST);NM_001204213.1(NOS1);NM_001204214.1(NOS1);NM_001204218.1(NOS1);NM_001204397.1(PITX2);NM_001204398.1(PITX2);NM_001284212.1(CAST);NM_001284213.1(CAST);NM_001288973.1(ADAM12);NM_001288974.1(ADAM12);NM_001288975.1(ADAM12);NM_001293083.1(FER1L5);NM_00130472…
GO:0007026	negative regulation of microtubule depolymerization	biological_process	133	35266	164	98659	1.46e-33	1.24e-32	2.26876	NM_000381.3(MID1);NM_001098624.2(MID1);NM_001098790.1(MID1IP1);NM_001098791.1(MID1IP1);NM_001127511.2(APC);NM_001142273.1(CLASP1);NM_001142274.1(CLASP1);NM_001162383.1(ARHGEF2);NM_001162384.1(ARHGEF2);NM_001193277.1(MID1);NM_001193278.1(MID1);NM_001193279.1(MID1);NM_001193280.1(MID1);NM_001193281.1(MID1);NM_001207044.1(CLASP2);NM_001207051.1(CLASP1);NM_001278730.1(GAS2L1);NM_002373.5(MAP1A);NM_00…
GO:0086045	membrane depolarization during AV node cell action potential	biological_process	85	35266	90	98659	1.58e-33	1.35e-32	2.64215	NM_000335.4(SCN5A);NM_000719.6(CACNA1C);NM_000724.3(CACNB2);NM_001099404.1(SCN5A);NM_001099405.1(SCN5A);NM_001129827.1(CACNA1C);NM_001129829.1(CACNA1C);NM_001129830.2(CACNA1C);NM_001129831.1(CACNA1C);NM_001129832.1(CACNA1C);NM_001129833.1(CACNA1C);NM_001129834.1(CACNA1C);NM_001129835.1(CACNA1C);NM_001129836.1(CACNA1C);NM_001129837.1(CACNA1C);NM_001129838.1(CACNA1C);NM_001129839.1(CACNA1C);NM_0011…
GO:0035556	intracellular signal transduction	biological_process	1192	35266	2524	98659	1.81e-33	1.53e-32	1.3212	NM_000180.3(GUCY2D);NM_000215.3(JAK3);NM_000679.3(ADRA1B);NM_000795.3(DRD2);NM_000855.2(GUCY1A2);NM_000906.3(NPR1);NM_000932.2(PLCB3);NM_001003652.3(SMAD2);NM_001006932.1(RPS6KA2);NM_001006944.1(RPS6KA4);NM_001010927.2(TIAM2);NM_001013742.3(DGKK);NM_001014431.1(AKT1);NM_001014432.1(AKT1);NM_001017915.2(INPP5D);NM_001018100.4(MYZAP);NM_001024660.3(KALRN);NM_001024937.3(MINK1);NM_001025201.3(CHN1);…
GO:0010976	positive regulation of neuron projection development	biological_process	369	35266	628	98659	2.16e-32	1.83e-31	1.64379	NM_000109.3(DMD);NM_000121.3(EPOR);NM_001002919.2(FAM150B);NM_001004342.3(TRIM67);NM_001007097.2(NTRK2);NM_001010935.2(RAP1A);NM_001018065.2(NTRK2);NM_001018066.2(NTRK2);NM_001032999.2(CBFA2T2);NM_001039469.2(MARK2);NM_001039709.1(CBFA2T2);NM_001039970.1(PTPN5);NM_001079533.1(CPEB1);NM_001079534.1(CPEB1);NM_001079535.1(CPEB1);NM_001080477.2(TENM3);NM_001099733.1(ADCYAP1);NM_001117.4(ADCYAP1);NM_0…
GO:0050885	neuromuscular process controlling balance	biological_process	205	35266	297	98659	4.87e-32	4.13e-31	1.93098	NM_000068.3(CACNA1A);NM_000086.2(CLN3);NM_000152.3(GAA);NM_000405.4(GM2A);NM_000484.3(APP);NM_000835.4(GRIN2C);NM_001001331.2(ATP2B2);NM_001031695.2(RBFOX2);NM_001042432.1(CLN3);NM_001079803.1(GAA);NM_001079804.1(GAA);NM_001082576.1(RBFOX2);NM_001082577.1(RBFOX2);NM_001082578.1(RBFOX2);NM_001082579.1(RBFOX2);NM_001092.4(ABR);NM_001127221.1(CACNA1A);NM_001127222.1(CACNA1A);NM_001128827.1(DLG4);NM_…
GO:0086010	membrane depolarization during action potential	biological_process	156	35266	208	98659	1.59e-31	1.35e-30	2.09818	NM_000068.3(CACNA1A);NM_000069.2(CACNA1S);NM_000334.4(SCN4A);NM_000335.4(SCN5A);NM_000718.3(CACNA1B);NM_000721.3(CACNA1E);NM_001003406.1(CACNA1I);NM_001005407.1(CACNA1H);NM_001040142.1(SCN2A);NM_001040143.1(SCN2A);NM_001081676.1(SCN3A);NM_001081677.1(SCN3A);NM_001099404.1(SCN5A);NM_001099405.1(SCN5A);NM_001127221.1(CACNA1A);NM_001127222.1(CACNA1A);NM_001143819.2(TPCN1);NM_001160160.1(SCN5A);NM_00…
GO:0086091	regulation of heart rate by cardiac conduction	biological_process	176	35266	245	98659	3.04e-31	2.57e-30	2.00968	NM_000218.2(KCNQ1);NM_000335.4(SCN5A);NM_000719.6(CACNA1C);NM_000722.3(CACNA2D1);NM_000724.3(CACNB2);NM_001008844.1(DSP);NM_001099404.1(SCN5A);NM_001099405.1(SCN5A);NM_001127384.2(CTNNA3);NM_001127493.1(ANK2);NM_001129827.1(CACNA1C);NM_001129829.1(CACNA1C);NM_001129830.2(CACNA1C);NM_001129831.1(CACNA1C);NM_001129832.1(CACNA1C);NM_001129833.1(CACNA1C);NM_001129834.1(CACNA1C);NM_001129835.1(CACNA1C…
GO:0000122	negative regulation of transcription from RNA polymerase II promoter	biological_process	1905	35266	4321	98659	3.34e-31	2.82e-30	1.23336	NM_000076.2(CDKN1C);NM_000118.3(ENG);NM_000141.4(FGFR2);NM_000168.5(GLI3);NM_000209.3(PDX1);NM_000264.3(PTCH1);NM_000325.5(PITX2);NM_000346.3(SOX9);NM_000435.2(NOTCH3);NM_000449.3(RFX5);NM_000458.3(HNF1B);NM_000461.4(THRB);NM_000474.3(TWIST1);NM_000475.4(NR0B1);NM_000546.5(TP53);NM_000796.5(DRD3);NM_000964.3(RARA);NM_001001548.2(CD36);NM_001002295.1(GATA3);NM_001002844.2(ZNF280D);NM_001003652.3(S…
RARA);XM_011525096.1(RARA);XM_011525158.1(TBX2);XM_011525159.1(TBX2);XM_011525160.1(HNF1B);XM_011525164.1(HNF1B);XM_011525382.1(CBX2);XM_011525383.1(CBX2);XM_011525399.1(CBX4);XM_011525735.1(TGIF1);XM_011525887.1(NEDD4L);XM_011525983.1(SMAD2);XM_011525984.1(SMAD2);XM_011525985.1(SMAD2);XM_011525986.1(SMAD2);XM_011525987.1(MBD1);XM_011525988.1(MBD1);XM_011525989.1(MBD1);XM_011525990.1(MBD1);XM_011…
GO:2000311	regulation of alpha-amino-3-hydroxy-5-methyl-4-isoxazole propionate selective glutamate receptor activity	biological_process	95	35266	108	98659	1.77e-30	1.5e-29	2.46082	NM_001024937.3(MINK1);NM_001131005.2(MEF2C);NM_001135659.1(NRXN1);NM_001193347.1(MEF2C);NM_001193348.1(MEF2C);NM_001193349.1(MEF2C);NM_001193350.1(MEF2C);NM_002397.4(MEF2C);NM_004801.4(NRXN1);NM_006078.3(CACNG2);NM_006539.3(CACNG3);NM_012324.4(MAPK8IP2);NM_014405.3(CACNG4);NM_015716.4(MINK1);NM_016148.2(SHANK1);NM_020795.3(NLGN2);NM_031895.5(CACNG8);NM_031896.4(CACNG7);NM_138735.2(NRXN1);NM_15249…
GO:0051294	establishment of spindle orientation	biological_process	77	35266	82	98659	4.12e-30	3.49e-29	2.62698	NM_001015002.1(LLGL2);NM_001031803.1(LLGL2);NM_001134364.1(MAP4);NM_001142273.1(CLASP1);NM_001142274.1(CLASP1);NM_001207051.1(CLASP1);NM_002375.4(MAP4);NM_004140.3(LLGL1);NM_004524.2(LLGL2);NM_015282.2(CLASP1);NM_030885.3(MAP4);XM_005265133.3(MAP4);XM_005265134.3(MAP4);XM_005265135.3(MAP4);XM_005265138.3(MAP4);XM_005265139.3(MAP4);XM_005265147.3(MAP4);XM_005265155.3(MAP4);XM_006712373.1(CLASP1);X…
GO:0043198	dendritic shaft	cellular_component	196	35266	286	98659	4.44e-30	3.75e-29	1.91721	NM_000484.3(APP);NM_000844.3(GRM7);NM_001002837.2(INPP5J);NM_001039966.1(GPER1);NM_001098201.1(GPER1);NM_001098635.1(SEZ6);NM_001110556.1(FLNA);NM_001112800.1(SLC8A1);NM_001112801.1(SLC8A1);NM_001112802.1(SLC8A1);NM_001134771.1(SLC12A5);NM_001136016.3(APP);NM_001136129.2(APP);NM_001136130.2(APP);NM_001136131.2(APP);NM_001146028.1(JPH4);NM_001146156.1(GSK3B);NM_001161707.1(KIRREL3);NM_001162383.1(…
GO:0086056	voltage-gated calcium channel activity involved in AV node cell action potential	molecular_function	76	35266	81	98659	1.1e-29	9.28e-29	2.62488	NM_000719.6(CACNA1C);NM_000724.3(CACNB2);NM_001129827.1(CACNA1C);NM_001129829.1(CACNA1C);NM_001129830.2(CACNA1C);NM_001129831.1(CACNA1C);NM_001129832.1(CACNA1C);NM_001129833.1(CACNA1C);NM_001129834.1(CACNA1C);NM_001129835.1(CACNA1C);NM_001129836.1(CACNA1C);NM_001129837.1(CACNA1C);NM_001129838.1(CACNA1C);NM_001129839.1(CACNA1C);NM_001129840.1(CACNA1C);NM_001129841.1(CACNA1C);NM_001129842.1(CACNA1C…
GO:0045773	positive regulation of axon extension	biological_process	180	35266	257	98659	1.2e-29	1.01e-28	1.95939	NM_000425.4(L1CAM);NM_001012957.1(DISC1);NM_001012958.1(DISC1);NM_001012959.1(DISC1);NM_001123066.3(MAPT);NM_001123067.3(MAPT);NM_001130136.1(ISLR2);NM_001130137.1(ISLR2);NM_001130138.1(ISLR2);NM_001143963.2(L1CAM);NM_001146029.1(SEMA7A);NM_001146030.1(SEMA7A);NM_001146156.1(GSK3B);NM_001160002.1(NRG1);NM_001160004.1(NRG1);NM_001160005.1(NRG1);NM_001160007.1(NRG1);NM_001160008.1(NRG1);NM_00116453…
GO:0042127	regulation of cell proliferation	biological_process	524	35266	989	98659	4.17e-29	3.52e-28	1.48223	NM_000029.3(AGT);NM_000118.3(ENG);NM_000135.2(FANCA);NM_000346.3(SOX9);NM_000418.3(IL4R);NM_000523.3(HOXD13);NM_000625.4(NOS2);NM_001010938.1(TNK2);NM_001013642.2(TRNP1);NM_001024847.2(TGFBR2);NM_001031695.2(RBFOX2);NM_001039664.1(TNFRSF25);NM_001042729.1(FGR);NM_001042747.1(FGR);NM_001065.3(TNFRSF1A);NM_001082576.1(RBFOX2);NM_001082577.1(RBFOX2);NM_001082578.1(RBFOX2);NM_001082579.1(RBFOX2);NM_0…
GO:0009790	embryo development	biological_process	285	35266	469	98659	8.5e-29	7.16e-28	1.70001	NM_001001935.2(ATP5A1);NM_001001937.1(ATP5A1);NM_001098534.1(BAG6);NM_001126103.1(RACGAP1);NM_001126104.1(RACGAP1);NM_001160002.1(NRG1);NM_001160004.1(NRG1);NM_001160005.1(NRG1);NM_001160007.1(NRG1);NM_001160008.1(NRG1);NM_001199697.1(BAG6);NM_001199698.1(BAG6);NM_001257334.1(ATP5A1);NM_001257335.1(ATP5A1);NM_001284214.1(TRIP12);NM_001285439.1(RICTOR);NM_001285440.1(RICTOR);NM_001286680.1(NPM2);N…
GO:0031430	M band	cellular_component	127	35266	164	98659	1.92e-28	1.62e-27	2.16641	NM_000034.3(ALDOA);NM_000037.3(ANK1);NM_001098623.2(OBSCN);NM_001127493.1(ANK2);NM_001142445.1(ANK1);NM_001142446.1(ANK1);NM_001148.4(ANK2);NM_001173408.1(OBSL1);NM_001173431.1(OBSL1);NM_001256850.1(TTN);NM_001267550.2(TTN);NM_001271223.2(OBSCN);NM_001291571.1(NBR1);NM_001291572.1(NBR1);NM_001428.3(ENO1);NM_001450.3(FHL2);NM_003319.4(TTN);NM_005899.4(NBR1);NM_006243.3(PPP2R5A);NM_015311.2(OBSL1);…
GO:0030424	axon	cellular_component	762	35266	1551	98659	6.24e-28	5.25e-27	1.37443	NM_000016.5(ACADM);NM_000024.5(ADRB2);NM_000190.3(HMBS);NM_000267.3(NF1);NM_000310.3(PPT1);NM_000484.3(APP);NM_000754.3(COMT);NM_000795.3(DRD2);NM_000831.3(GRIK3);NM_000839.3(GRM2);NM_000844.3(GRM7);NM_001002261.3(ZFYVE27);NM_001002262.3(ZFYVE27);NM_001008701.2(ADGRL1);NM_001009993.2(FAM168B);NM_001012957.1(DISC1);NM_001012958.1(DISC1);NM_001012959.1(DISC1);NM_001024382.1(HMBS);NM_001024628.2(NRP…
GO:0007130	synaptonemal complex assembly	biological_process	186	35266	275	98659	1.52e-27	1.28e-26	1.89217	NM_001098534.1(BAG6);NM_001105578.1(SYCE2);NM_001136566.2(RAD21L1);NM_001143764.1(SYCE1);NM_001166260.1(TRIP13);NM_001199697.1(BAG6);NM_001199698.1(BAG6);NM_004237.3(TRIP13);NM_004639.3(BAG6);NM_080702.2(BAG6);NM_080703.2(BAG6);XM_005259848.3(SYCE2);XM_005267531.3(MLH3);XM_006715192.1(BAG6);XM_006715198.1(BAG6);XM_006715201.1(BAG6);XM_006715203.1(BAG6);XM_006723602.2(RAD21L1);XM_006723603.2(RAD21…
GO:0035914	skeletal muscle cell differentiation	biological_process	145	35266	201	98659	1.9e-26	1.6e-25	2.01815	NM_001030287.3(ATF3);NM_001040619.2(ATF3);NM_001042483.1(NUPR1);NM_001080951.1(PLAGL1);NM_001080952.1(PLAGL1);NM_001080953.1(PLAGL1);NM_001080954.1(PLAGL1);NM_001080955.1(PLAGL1);NM_001080956.1(PLAGL1);NM_001112704.1(VAX1);NM_001122823.1(GTF3C5);NM_001127714.2(HIVEP3);NM_001130015.1(ANKRD33);NM_001131005.2(MEF2C);NM_001161572.1(MAFF);NM_001161573.1(MAFF);NM_001161574.1(MAFF);NM_001193347.1(MEF2C)…
GO:1903690	negative regulation of wound healing, spreading of epidermal cells	biological_process	60	35266	62	98659	2.17e-26	1.82e-25	2.70732	NM_001134438.1(PHLDB2);NM_001142273.1(CLASP1);NM_001142274.1(CLASP1);NM_001207044.1(CLASP2);NM_001207051.1(CLASP1);NM_015097.2(CLASP2);NM_015282.2(CLASP1);NM_145753.2(PHLDB2);XM_006712373.1(CLASP1);XM_006712374.1(CLASP1);XM_006712375.1(CLASP1);XM_006712377.1(CLASP1);XM_006712381.1(CLASP1);XM_006712382.1(CLASP1);XM_006712383.1(CLASP1);XM_006712385.1(CLASP1);XM_006713036.1(CLASP2);XM_006713040.1(CL…
GO:0043025	neuronal cell body	cellular_component	942	35266	1999	98659	2.31e-26	1.94e-25	1.31831	NM_000068.3(CACNA1A);NM_000101.3(CYBA);NM_000259.3(MYO5A);NM_000303.2(PMM2);NM_000310.3(PPT1);NM_000674.2(ADORA1);NM_000718.3(CACNA1B);NM_000741.3(CHRM4);NM_000743.4(CHRNA3);NM_000744.6(CHRNA4);NM_000964.3(RARA);NM_001001331.2(ATP2B2);NM_001001502.1(SNCB);NM_001008220.1(CPLX2);NM_001024628.2(NRP1);NM_001024629.2(NRP1);NM_001024809.3(RARA);NM_001025081.1(MBP);NM_001025090.1(MBP);NM_001025092.1(MBP…
GO:1904261	positive regulation of basement membrane assembly involved in embryonic body morphogenesis	biological_process	93	35266	111	98659	2.59e-26	2.17e-25	2.34391	NM_001134438.1(PHLDB2);NM_001142273.1(CLASP1);NM_001142274.1(CLASP1);NM_001165928.3(DAG1);NM_001177634.2(DAG1);NM_001177635.2(DAG1);NM_001177636.2(DAG1);NM_001177637.2(DAG1);NM_001177638.2(DAG1);NM_001177639.2(DAG1);NM_001177640.2(DAG1);NM_001177641.2(DAG1);NM_001177642.2(DAG1);NM_001177643.2(DAG1);NM_001177644.2(DAG1);NM_001207044.1(CLASP2);NM_001207051.1(CLASP1);NM_004393.5(DAG1);NM_015097.2(CL…
GO:0007420	brain development	biological_process	648	35266	1299	98659	3.79e-26	3.18e-25	1.39555	NM_000121.3(EPOR);NM_000264.3(PTCH1);NM_000267.3(NF1);NM_000310.3(PPT1);NM_000462.3(UBE3A);NM_000553.4(WRN);NM_001010898.2(SLC6A17);NM_001024847.2(TGFBR2);NM_001042440.3(CAST);NM_001042492.2(NF1);NM_001079870.1(HAP1);NM_001079871.1(HAP1);NM_001081640.1(PRKDC);NM_001083602.1(PTCH1);NM_001083603.1(PTCH1);NM_001083604.1(PTCH1);NM_001083605.1(PTCH1);NM_001083606.1(PTCH1);NM_001083607.1(PTCH1);NM_0010…
GO:0061049	cell growth involved in cardiac muscle cell development	biological_process	98	35266	120	98659	8.04e-26	6.73e-25	2.28468	NM_000029.3(AGT);NM_001011513.3(PDLIM5);NM_001011515.2(PDLIM5);NM_001011516.2(PDLIM5);NM_001145670.1(SORBS2);NM_001145671.2(SORBS2);NM_001145672.1(SORBS2);NM_001145673.1(SORBS2);NM_001145674.1(SORBS2);NM_001145675.1(SORBS2);NM_001221.3(CAMK2D);NM_001256425.1(PDLIM5);NM_001256426.1(PDLIM5);NM_001256427.1(PDLIM5);NM_001256428.1(PDLIM5);NM_001256429.1(PDLIM5);NM_001270771.1(SORBS2);NM_002052.3(GATA4…
GO:0031113	regulation of microtubule polymerization	biological_process	69	35266	75	98659	1e-25	8.39e-25	2.57376	NM_001123066.3(MAPT);NM_001123067.3(MAPT);NM_001203251.1(MAPT);NM_001203252.1(MAPT);NM_001207044.1(CLASP2);NM_001667.3(ARL2);NM_005157.5(ABL1);NM_005910.5(MAPT);NM_007313.2(ABL1);NM_015097.2(CLASP2);NM_016834.4(MAPT);NM_016835.4(MAPT);NM_016841.4(MAPT);XM_005257362.3(MAPT);XM_005257364.3(MAPT);XM_005257365.3(MAPT);XM_005257366.2(MAPT);XM_005257369.3(MAPT);XM_005257370.3(MAPT);XM_005257371.3(MAPT)…
GO:0060998	regulation of dendritic spine development	biological_process	84	35266	98	98659	1.87e-25	1.56e-24	2.39791	NM_001012957.1(DISC1);NM_001012958.1(DISC1);NM_001012959.1(DISC1);NM_001131005.2(MEF2C);NM_001164537.1(DISC1);NM_001164538.1(DISC1);NM_001164539.1(DISC1);NM_001164540.1(DISC1);NM_001164541.1(DISC1);NM_001164542.1(DISC1);NM_001164544.1(DISC1);NM_001164545.1(DISC1);NM_001164546.1(DISC1);NM_001164547.1(DISC1);NM_001164548.1(DISC1);NM_001164549.1(DISC1);NM_001164550.1(DISC1);NM_001164551.1(DISC1);NM_…
GO:0030673	axolemma	cellular_component	145	35266	204	98659	2.32e-25	1.94e-24	1.98847	NM_000037.3(ANK1);NM_000674.2(ADORA1);NM_001040439.1(MAPK8IP3);NM_001048230.1(ADORA1);NM_001128929.3(ROBO2);NM_001142445.1(ANK1);NM_001142446.1(ANK1);NM_001160002.1(NRG1);NM_001160004.1(NRG1);NM_001160005.1(NRG1);NM_001160007.1(NRG1);NM_001160008.1(NRG1);NM_001260497.1(KCNC2);NM_001260498.1(KCNC2);NM_001260499.1(KCNC2);NM_001281534.1(EPB41L3);NM_001290039.1(ROBO2);NM_001290040.1(ROBO2);NM_0012900…
GO:0034765	regulation of ion transmembrane transport	biological_process	358	35266	646	98659	6.13e-25	5.12e-24	1.55035	NM_000068.3(CACNA1A);NM_000069.2(CACNA1S);NM_000334.4(SCN4A);NM_000718.3(CACNA1B);NM_000721.3(CACNA1E);NM_000727.3(CACNG1);NM_000890.3(KCNJ5);NM_001001412.3(CALHM1);NM_001003406.1(CACNA1I);NM_001005407.1(CACNA1H);NM_001005505.2(CACNA2D2);NM_001014797.2(KCNMA1);NM_001039574.2(KCNC4);NM_001040142.1(SCN2A);NM_001040143.1(SCN2A);NM_001081676.1(SCN3A);NM_001081677.1(SCN3A);NM_001127221.1(CACNA1A);NM_0…
GO:0001822	kidney development	biological_process	381	35266	697	98659	6.49e-25	5.42e-24	1.52923	NM_000029.3(AGT);NM_000050.4(ASS1);NM_000076.2(CDKN1C);NM_000296.3(PKD1);NM_000458.3(HNF1B);NM_000537.3(REN);NM_000789.3(ACE);NM_001002295.1(GATA3);NM_001009944.2(PKD1);NM_001013436.2(MPST);NM_001014445.2(NLE1);NM_001025366.2(VEGFA);NM_001025367.2(VEGFA);NM_001025368.2(VEGFA);NM_001025369.2(VEGFA);NM_001025370.2(VEGFA);NM_001033756.2(VEGFA);NM_001081461.1(JMJD6);NM_001098534.1(BAG6);NM_001106.3(A…
GO:0097116	gephyrin clustering involved in postsynaptic density assembly	biological_process	59	35266	62	98659	1.2e-24	1e-23	2.6622	NM_001135659.1(NRXN1);NM_004801.4(NRXN1);NM_015080.3(NRXN2);NM_020795.3(NLGN2);NM_138732.2(NRXN2);NM_138734.2(NRXN2);NM_138735.2(NRXN1);XM_005256744.2(NLGN2);XM_005264642.2(NRXN1);XM_005264643.2(NRXN1);XM_005274400.3(NRXN2);XM_005274401.3(NRXN2);XM_005274402.3(NRXN2);XM_006712137.2(NRXN1);XM_006712140.2(NRXN1);XM_006712141.2(NRXN1);XM_006718742.2(NRXN2);XM_006718745.2(NRXN2);XM_011533167.1(NRXN1)…
GO:0001958	endochondral ossification	biological_process	129	35266	178	98659	4.41e-24	3.67e-23	2.02745	NM_000088.3(COL1A1);NM_000142.4(FGFR3);NM_000288.3(PEX7);NM_000459.4(TEK);NM_000478.4(ALPL);NM_000493.3(COL10A1);NM_001015051.3(RUNX2);NM_001024630.3(RUNX2);NM_001077490.1(GNAS);NM_001127501.2(ALPL);NM_001130518.1(CSGALNACT1);NM_001131005.2(MEF2C);NM_001143804.1(PHOSPHO1);NM_001163213.1(FGFR3);NM_001193347.1(MEF2C);NM_001193348.1(MEF2C);NM_001193349.1(MEF2C);NM_001193350.1(MEF2C);NM_001202.3(BMP4…
GO:0097481	neuronal postsynaptic density	cellular_component	275	35266	473	98659	1.08e-23	8.96e-23	1.62649	NM_001004720.2(NCK2);NM_001007097.2(NTRK2);NM_001009566.2(CLSTN1);NM_001018065.2(NTRK2);NM_001018066.2(NTRK2);NM_001039966.1(GPER1);NM_001040134.1(PALM);NM_001098201.1(GPER1);NM_001114135.3(DMTN);NM_001114136.2(DMTN);NM_001114137.2(DMTN);NM_001114138.2(DMTN);NM_001114139.2(DMTN);NM_001121.2(ADD3);NM_001128827.1(DLG4);NM_001134364.1(MAP4);NM_001134407.2(GRIN2A);NM_001135774.1(SYN3);NM_001144888.1(…
GO:0016568	chromatin modification	biological_process	470	35266	907	98659	1.2e-23	9.98e-23	1.44968	NM_001009936.2(PHF19);NM_001015053.1(HDAC5);NM_001018077.1(NR3C1);NM_001079514.2(UBN1);NM_001098534.1(BAG6);NM_001113182.2(BRD2);NM_001130823.1(DNMT1);NM_001136041.2(HDAC11);NM_001159286.1(HDAC10);NM_001173539.1(BANP);NM_001173540.1(BANP);NM_001173541.1(BANP);NM_001173542.1(BANP);NM_001173543.1(BANP);NM_001191022.1(CTCF);NM_001199281.1(CABIN1);NM_001199455.1(BRD2);NM_001199456.1(BRD2);NM_00119969…
GO:0006810	transport	biological_process	687	35266	1419	98659	2.91e-23	2.42e-22	1.35442	NM_000044.3(AR);NM_000080.3(CHRNE);NM_000084.4(CLCN5);NM_000085.4(CLCNKB);NM_000166.5(GJB1);NM_000259.3(MYO5A);NM_000356.3(TCOF1);NM_000371.3(TTR);NM_000453.2(SLC5A5);NM_000704.2(ATP4A);NM_000718.3(CACNA1B);NM_000721.3(CACNA1E);NM_000723.4(CACNB1);NM_000725.3(CACNB3);NM_000727.3(CACNG1);NM_000809.3(GABRA4);NM_000835.4(GRIN2C);NM_001001331.2(ATP2B2);NM_001001344.2(ATP2B3);NM_001001712.2(LCN10);NM_…
GO:0014069	postsynaptic density	cellular_component	564	35266	1131	98659	6.05e-23	5.03e-22	1.39507	NM_000264.3(PTCH1);NM_000620.4(NOS1);NM_000674.2(ADORA1);NM_000719.6(CACNA1C);NM_000738.2(CHRM1);NM_000741.3(CHRM4);NM_000743.4(CHRNA3);NM_000795.3(DRD2);NM_000835.4(GRIN2C);NM_001005360.2(DNM2);NM_001005361.2(DNM2);NM_001005362.2(DNM2);NM_001005476.2(PKP4);NM_001011513.3(PDLIM5);NM_001011515.2(PDLIM5);NM_001011516.2(PDLIM5);NM_001012957.1(DISC1);NM_001012958.1(DISC1);NM_001012959.1(DISC1);NM_001…
GO:0045944	positive regulation of transcription from RNA polymerase II promoter	biological_process	2294	35266	5473	98659	1.33e-22	1.11e-21	1.1726	NM_000024.5(ADRB2);NM_000044.3(AR);NM_000077.4(CDKN2A);NM_000118.3(ENG);NM_000141.4(FGFR2);NM_000168.5(GLI3);NM_000192.3(TBX5);NM_000209.3(PDX1);NM_000278.3(PAX2);NM_000296.3(PKD1);NM_000325.5(PITX2);NM_000333.3(ATXN7);NM_000346.3(SOX9);NM_000383.3(AIRE);NM_000400.3(ERCC2);NM_000435.2(NOTCH3);NM_000461.4(THRB);NM_000462.3(UBE3A);NM_000474.3(TWIST1);NM_000484.3(APP);NM_000523.3(HOXD13);NM_000545.5…
511070.1(HOXD13);XM_011511242.1(NPAS2);XM_011511246.1(NR4A2);XM_011511687.1(BMPR2);XM_011511688.1(BMPR2);XM_011511790.1(PAX8);XM_011511791.1(PAX8);XM_011511792.1(PAX8);XM_011511793.1(PAX8);XM_011511794.1(PAX8);XM_011511991.1(NCK2);XM_011512106.1(ACVR1);XM_011512107.1(ACVR1);XM_011512108.1(ACVR1);XM_011512217.1(HDAC4);XM_011512218.1(HDAC4);XM_011512219.1(HDAC4);XM_011512220.1(HDAC4);XM_011512221.1…
GO:0050821	protein stabilization	biological_process	398	35266	752	98659	1.9e-22	1.58e-21	1.48063	NM_000077.4(CDKN2A);NM_000287.3(PEX6);NM_000314.5(PTEN);NM_000314.6(PTEN);NM_001002296.1(GOLGA7);NM_001008800.2(CCT3);NM_001008897.1(TCP1);NM_001080513.3(CPN2);NM_001080849.2(DNLZ);NM_001098534.1(BAG6);NM_001110556.1(FLNA);NM_001127493.1(ANK2);NM_001144831.1(PHB2);NM_001145853.1(WFS1);NM_001148.4(ANK2);NM_001161527.1(TNIP2);NM_001190821.1(SMAD7);NM_001195132.1(CDKN2A);NM_001198818.1(A1CF);NM_0011…
GO:0021801	cerebral cortex radial glia guided migration	biological_process	51	35266	53	98659	1.97e-22	1.63e-21	2.692	NM_001145770.2(ADGRG1);NM_001145771.2(ADGRG1);NM_001145772.2(ADGRG1);NM_001145773.2(ADGRG1);NM_001145774.2(ADGRG1);NM_001290142.1(ADGRG1);NM_001290143.1(ADGRG1);NM_001290144.1(ADGRG1);NM_005682.6(ADGRG1);NM_020532.4(RTN4);NM_201524.3(ADGRG1);NM_201525.3(ADGRG1);NM_207520.1(RTN4);NM_207521.1(RTN4);XM_005256237.1(ADGRG1);XM_005256238.1(ADGRG1);XM_005256239.1(ADGRG1);XM_005256240.3(ADGRG1);XM_005256…
GO:0016235	aggresome	cellular_component	162	35266	246	98659	2.24e-22	1.85e-21	1.8423	NM_001005207.2(TRIM37);NM_001104587.1(SLFN11);NM_001104588.1(SLFN11);NM_001104589.1(SLFN11);NM_001104590.1(SLFN11);NM_001142298.1(SQSTM1);NM_001142299.1(SQSTM1);NM_001184996.1(RNF32);NM_001184997.1(RNF32);NM_001199281.1(CABIN1);NM_001201429.1(CABIN1);NM_001256849.1(POLD1);NM_001303118.1(UCMA);NM_001303119.1(UCMA);NM_001304519.1(EVX1);NM_001304520.1(EVX1);NM_001304547.1(MVB12A);NM_001981.2(EPS15);…
GO:0032483	regulation of Rab protein signal transduction	biological_process	74	35266	87	98659	2.86e-22	2.37e-21	2.37954	NM_001135943.1(MADD);NM_001135944.1(MADD);NM_001301849.1(SGSM3);NM_003682.3(MADD);NM_014856.2(DENND4B);NM_015705.5(SGSM3);NM_020946.1(DENND1A);NM_130470.2(MADD);NM_130471.2(MADD);NM_130472.2(MADD);NM_130473.2(MADD);NM_130474.2(MADD);NM_130475.2(MADD);NM_130476.2(MADD);XM_005245678.3(DENND4B);XM_005245679.2(DENND4B);XM_005252109.2(DENND1A);XM_005252111.3(DENND1A);XM_005253188.1(MADD);XM_005253189.…
GO:0005622	intracellular	cellular_component	1339	35266	3037	98659	2.93e-22	2.43e-21	1.23344	NM_000335.4(SCN5A);NM_000395.2(CSF2RB);NM_000417.2(IL2RA);NM_000428.2(LTBP2);NM_000625.4(NOS2);NM_000727.3(CACNG1);NM_000795.3(DRD2);NM_000836.2(GRIN2D);NM_000839.3(GRM2);NM_000841.3(GRM4);NM_000852.3(GSTP1);NM_000874.4(IFNAR2);NM_000878.3(IL2RB);NM_001001419.2(SMAD5);NM_001001420.2(SMAD5);NM_001001891.3(ANO7);NM_001003789.1(RABL2B);NM_001005388.2(NFASC);NM_001005389.1(NFASC);NM_001010844.3(IRAK1…
GO:0000979	RNA polymerase II core promoter sequence-specific DNA binding	molecular_function	230	35266	385	98659	2.97e-22	2.46e-21	1.67127	NM_001001419.2(SMAD5);NM_001001420.2(SMAD5);NM_001002295.1(GATA3);NM_001003698.3(RREB1);NM_001003699.3(RREB1);NM_001003700.1(RREB1);NM_001005366.1(KDM2B);NM_001015051.3(RUNX2);NM_001024630.3(RUNX2);NM_001042539.2(MAZ);NM_001130145.2(YAP1);NM_001145661.1(GATA2);NM_001145662.1(GATA2);NM_001168344.1(RREB1);NM_001178078.1(STAT6);NM_001178080.1(STAT6);NM_001178081.1(STAT6);NM_001195044.1(YAP1);NM_0011…
GO:0060402	calcium ion transport into cytosol	biological_process	92	35266	117	98659	4.2e-22	3.47e-21	2.1998	NM_000719.6(CACNA1C);NM_000722.3(CACNA2D1);NM_000725.3(CACNB3);NM_001035.2(RYR2);NM_001112800.1(SLC8A1);NM_001112801.1(SLC8A1);NM_001112802.1(SLC8A1);NM_001129827.1(CACNA1C);NM_001129829.1(CACNA1C);NM_001129830.2(CACNA1C);NM_001129831.1(CACNA1C);NM_001129832.1(CACNA1C);NM_001129833.1(CACNA1C);NM_001129834.1(CACNA1C);NM_001129835.1(CACNA1C);NM_001129836.1(CACNA1C);NM_001129837.1(CACNA1C);NM_001129…
GO:0019898	extrinsic component of membrane	cellular_component	339	35266	622	98659	4.24e-22	3.5e-21	1.52472	NM_000311.3(PRNP);NM_001003794.2(MGLL);NM_001012994.1(SNX30);NM_001029896.1(WDR45);NM_001033518.1(WIPI2);NM_001033519.1(WIPI2);NM_001033520.1(WIPI2);NM_001039130.1(ALOX15B);NM_001039131.1(ALOX15B);NM_001080121.1(PRNP);NM_001080122.1(PRNP);NM_001099433.1(JAKMIP1);NM_001114132.1(NBEAL1);NM_001129896.2(SYTL4);NM_001141.2(ALOX15B);NM_001143854.1(RPH3A);NM_001145453.1(GFRA1);NM_001165038.1(GFRA2);NM_0…
GO:0031116	positive regulation of microtubule polymerization	biological_process	89	35266	112	98659	4.73e-22	3.91e-21	2.22307	NM_001005290.3(PSRC1);NM_001032291.2(PSRC1);NM_001115116.1(ANKRD53);NM_001123066.3(MAPT);NM_001123067.3(MAPT);NM_001142273.1(CLASP1);NM_001142274.1(CLASP1);NM_001143783.1(FES);NM_001143784.1(FES);NM_001143785.1(FES);NM_001172895.1(CAV1);NM_001203251.1(MAPT);NM_001203252.1(MAPT);NM_001207051.1(CLASP1);NM_001667.3(ARL2);NM_002005.3(FES);NM_003218.3(TERF1);NM_004064.4(CDKN1B);NM_005910.5(MAPT);NM_01…
GO:0002162	dystroglycan binding	molecular_function	103	35266	137	98659	9.96e-22	8.22e-21	2.10328	NM_000109.3(DMD);NM_001142273.1(CLASP1);NM_001142274.1(CLASP1);NM_001165928.3(DAG1);NM_001177634.2(DAG1);NM_001177635.2(DAG1);NM_001177636.2(DAG1);NM_001177637.2(DAG1);NM_001177638.2(DAG1);NM_001177639.2(DAG1);NM_001177640.2(DAG1);NM_001177641.2(DAG1);NM_001177642.2(DAG1);NM_001177643.2(DAG1);NM_001177644.2(DAG1);NM_001207044.1(CLASP2);NM_001207051.1(CLASP1);NM_004006.2(DMD);NM_004009.3(DMD);NM_0…
GO:0050998	nitric-oxide synthase binding	molecular_function	102	35266	136	98659	2.12e-21	1.75e-20	2.09818	NM_000109.3(DMD);NM_000335.4(SCN5A);NM_001005336.2(DNM1);NM_001005360.2(DNM2);NM_001005361.2(DNM2);NM_001005362.2(DNM2);NM_001099404.1(SCN5A);NM_001099405.1(SCN5A);NM_001101.3(ACTB);NM_001136127.2(DNM3);NM_001160160.1(SCN5A);NM_001160161.1(SCN5A);NM_001172895.1(CAV1);NM_001190716.1(DNM2);NM_001221.3(CAMK2D);NM_001278252.1(DNM3);NM_001288737.1(DNM1);NM_001288738.1(DNM1);NM_001288739.1(DNM1);NM_001…
GO:0001938	positive regulation of endothelial cell proliferation	biological_process	205	35266	337	98659	2.27e-21	1.87e-20	1.70178	NM_000101.3(CYBA);NM_000267.3(NF1);NM_000459.4(TEK);NM_000609.6(CXCL12);NM_001014431.1(AKT1);NM_001014432.1(AKT1);NM_001024628.2(NRP1);NM_001024629.2(NRP1);NM_001025366.2(VEGFA);NM_001025367.2(VEGFA);NM_001025368.2(VEGFA);NM_001025369.2(VEGFA);NM_001025370.2(VEGFA);NM_001033756.2(VEGFA);NM_001042492.2(NF1);NM_001079880.1(PRKD2);NM_001079881.1(PRKD2);NM_001079882.1(PRKD2);NM_001128147.2(NF1);NM_00…
GO:0097119	postsynaptic density protein 95 clustering	biological_process	68	35266	79	98659	2.69e-21	2.21e-20	2.40803	NM_001135659.1(NRXN1);NM_004801.4(NRXN1);NM_005045.3(RELN);NM_015080.3(NRXN2);NM_020795.3(NLGN2);NM_022143.4(LRRC4);NM_138732.2(NRXN2);NM_138734.2(NRXN2);NM_138735.2(NRXN1);NM_173054.2(RELN);XM_005247232.1(NLGN1);XM_005247233.1(NLGN1);XM_005247234.1(NLGN1);XM_005247236.1(NLGN1);XM_005256744.2(NLGN2);XM_005264642.2(NRXN1);XM_005264643.2(NRXN1);XM_005274400.3(NRXN2);XM_005274401.3(NRXN2);XM_0052744…
GO:0090091	positive regulation of extracellular matrix disassembly	biological_process	66	35266	76	98659	3.22e-21	2.65e-20	2.42947	NM_001013838.1(RLTPR);NM_001142273.1(CLASP1);NM_001142274.1(CLASP1);NM_001207044.1(CLASP2);NM_001207051.1(CLASP1);NM_015097.2(CLASP2);NM_015282.2(CLASP1);XM_005255807.2(RLTPR);XM_006712373.1(CLASP1);XM_006712374.1(CLASP1);XM_006712375.1(CLASP1);XM_006712377.1(CLASP1);XM_006712381.1(CLASP1);XM_006712382.1(CLASP1);XM_006712383.1(CLASP1);XM_006712385.1(CLASP1);XM_006713036.1(CLASP2);XM_006713040.1(C…
GO:1903955	positive regulation of protein targeting to mitochondrion	biological_process	286	35266	511	98659	3.72e-21	3.06e-20	1.56576	NM_000887.4(ITGAX);NM_000991.4(RPL28);NM_001012478.1(U2AF2);NM_001025203.1(U2AF1);NM_001025204.1(U2AF1);NM_001039165.2(MRGPRE);NM_001039970.1(PTPN5);NM_001122834.3(HHAT);NM_001136134.1(RPL28);NM_001142673.2(ATG13);NM_001145713.1(SAE1);NM_001145714.1(SAE1);NM_001160002.1(NRG1);NM_001160004.1(NRG1);NM_001160005.1(NRG1);NM_001160007.1(NRG1);NM_001160008.1(NRG1);NM_001170580.2(HHAT);NM_001170587.2(HH…
GO:0070588	calcium ion transmembrane transport	biological_process	415	35266	802	98659	5.92e-21	4.87e-20	1.44762	NM_000068.3(CACNA1A);NM_000069.2(CACNA1S);NM_000296.3(PKD1);NM_000718.3(CACNA1B);NM_000719.6(CACNA1C);NM_000721.3(CACNA1E);NM_000723.4(CACNB1);NM_000724.3(CACNB2);NM_000727.3(CACNG1);NM_000820.3(GAS6);NM_000844.3(GRM7);NM_000914.4(OPRM1);NM_001001331.2(ATP2B2);NM_001001344.2(ATP2B3);NM_001001412.3(CALHM1);NM_001003406.1(CACNA1I);NM_001005407.1(CACNA1H);NM_001005505.2(CACNA2D2);NM_001006641.3(SLC2…
GO:0017166	vinculin binding	molecular_function	87	35266	111	98659	7.5e-21	6.16e-20	2.19269	NM_000109.3(DMD);NM_001018003.2(SORBS3);NM_001080855.2(PXN);NM_001165928.3(DAG1);NM_001177634.2(DAG1);NM_001177635.2(DAG1);NM_001177636.2(DAG1);NM_001177637.2(DAG1);NM_001177638.2(DAG1);NM_001177639.2(DAG1);NM_001177640.2(DAG1);NM_001177641.2(DAG1);NM_001177642.2(DAG1);NM_001177643.2(DAG1);NM_001177644.2(DAG1);NM_001243756.1(PXN);NM_001290307.1(CTNNA1);NM_001290309.1(CTNNA1);NM_001290310.1(CTNNA1…
GO:0030425	dendrite	cellular_component	850	35266	1841	98659	7.65e-21	6.28e-20	1.29165	NM_000068.3(CACNA1A);NM_000101.3(CYBA);NM_000267.3(NF1);NM_000310.3(PPT1);NM_000360.3(TH);NM_000490.4(AVP);NM_000698.3(ALOX5);NM_000718.3(CACNA1B);NM_000738.2(CHRM1);NM_000743.4(CHRNA3);NM_000744.6(CHRNA4);NM_000795.3(DRD2);NM_000824.4(GLRB);NM_000831.3(GRIK3);NM_000839.3(GRM2);NM_000844.3(GRM7);NM_000964.3(RARA);NM_000991.4(RPL28);NM_001001715.3(FARP1);NM_001002261.3(ZFYVE27);NM_001002262.3(ZFYV…
GO:0034993	LINC complex	cellular_component	65	35266	75	98659	7.97e-21	6.54e-20	2.42456	NM_001039876.1(SYNE4);NM_001130965.2(SUN1);NM_001171944.1(SUN1);NM_001171945.1(SUN1);NM_001171946.1(SUN1);NM_001199579.1(SUN2);NM_001199580.1(SUN2);NM_001297735.1(SYNE4);NM_015180.4(SYNE2);NM_015374.2(SUN2);NM_025154.5(SUN1);NM_152592.3(SYNE3);NM_182910.2(SYNE2);NM_182913.2(SYNE2);NM_182914.2(SYNE2);XM_005258598.2(SYNE4);XM_005258601.2(SYNE4);XM_005258604.3(SYNE4);XM_005267376.3(SYNE3);XM_0052673…
GO:0030949	positive regulation of vascular endothelial growth factor receptor signaling pathway	biological_process	75	35266	91	98659	8.58e-21	7.04e-20	2.30569	NM_000638.3(VTN);NM_001001549.2(GRB10);NM_001001550.2(GRB10);NM_001001555.2(GRB10);NM_001025366.2(VEGFA);NM_001025367.2(VEGFA);NM_001025368.2(VEGFA);NM_001025369.2(VEGFA);NM_001025370.2(VEGFA);NM_001033756.2(VEGFA);NM_001079880.1(PRKD2);NM_001079881.1(PRKD2);NM_001079882.1(PRKD2);NM_001171622.1(VEGFA);NM_001171623.1(VEGFA);NM_001171624.1(VEGFA);NM_001171625.1(VEGFA);NM_001171626.1(VEGFA);NM_00117…
GO:0005245	voltage-gated calcium channel activity	molecular_function	172	35266	272	98659	8.96e-21	7.34e-20	1.76905	NM_000068.3(CACNA1A);NM_000069.2(CACNA1S);NM_000540.2(RYR1);NM_000718.3(CACNA1B);NM_000719.6(CACNA1C);NM_000721.3(CACNA1E);NM_000722.3(CACNA2D1);NM_000723.4(CACNB1);NM_000724.3(CACNB2);NM_000725.3(CACNB3);NM_000727.3(CACNG1);NM_000820.3(GAS6);NM_000844.3(GRM7);NM_000914.4(OPRM1);NM_001001412.3(CALHM1);NM_001003406.1(CACNA1I);NM_001005505.2(CACNA2D2);NM_001042723.1(RYR1);NM_001127221.1(CACNA1A);NM…
GO:0086015	SA node cell action potential	biological_process	61	35266	69	98659	1.01e-20	8.23e-20	2.47321	NM_000335.4(SCN5A);NM_001099404.1(SCN5A);NM_001099405.1(SCN5A);NM_001127493.1(ANK2);NM_001148.4(ANK2);NM_001160160.1(SCN5A);NM_001160161.1(SCN5A);NM_001256324.1(CACNA1G);NM_001256325.1(CACNA1G);NM_001256326.1(CACNA1G);NM_001256327.1(CACNA1G);NM_001256328.1(CACNA1G);NM_001256329.1(CACNA1G);NM_001256330.1(CACNA1G);NM_001256331.1(CACNA1G);NM_001256332.1(CACNA1G);NM_001256333.1(CACNA1G);NM_001256334.…
GO:0005201	extracellular matrix structural constituent	molecular_function	166	35266	261	98659	1.68e-20	1.38e-19	1.7793	NM_000088.3(COL1A1);NM_000091.4(COL4A3);NM_000092.4(COL4A4);NM_000093.4(COL5A1);NM_000095.2(COMP);NM_000138.4(FBN1);NM_000495.4(COL4A5);NM_000501.3(ELN);NM_001004019.1(FBLN2);NM_001081752.2(ELN);NM_001081753.2(ELN);NM_001081754.2(ELN);NM_001081755.2(ELN);NM_001105206.2(LAMA4);NM_001105207.2(LAMA4);NM_001135.3(ACAN);NM_001165035.1(FBLN2);NM_001190709.1(COL11A1);NM_001276.2(CHI3L1);NM_001278074.1(C…
GO:0045211	postsynaptic membrane	cellular_component	711	35266	1507	98659	1.87e-20	1.53e-19	1.31989	NM_000037.3(ANK1);NM_000080.3(CHRNE);NM_000109.3(DMD);NM_000314.5(PTEN);NM_000314.6(PTEN);NM_000674.2(ADORA1);NM_000738.2(CHRM1);NM_000741.3(CHRM4);NM_000742.3(CHRNA2);NM_000743.4(CHRNA3);NM_000744.6(CHRNA4);NM_000746.5(CHRNA7);NM_000754.3(COMT);NM_000809.3(GABRA4);NM_000824.4(GLRB);NM_000831.3(GRIK3);NM_000835.4(GRIN2C);NM_000836.2(GRIN2D);NM_000844.3(GRM7);NM_000911.3(OPRD1);NM_001005360.2(DNM2…
GO:0005123	death receptor binding	molecular_function	117	35266	166	98659	2.12e-20	1.73e-19	1.97178	NM_001080124.1(CASP8);NM_001080125.1(CASP8);NM_001127183.2(CFLAR);NM_001135943.1(MADD);NM_001135944.1(MADD);NM_001185057.2(NOL3);NM_001196.3(BID);NM_001202515.1(CFLAR);NM_001202516.1(CFLAR);NM_001202517.1(CFLAR);NM_001202518.1(CFLAR);NM_001202519.1(CFLAR);NM_001228.4(CASP8);NM_001244567.1(BID);NM_001244569.1(BID);NM_001244570.1(BID);NM_001244572.1(BID);NM_001276307.1(NOL3);NM_001276309.1(NOL3);NM…
GO:0097105	presynaptic membrane assembly	biological_process	87	35266	112	98659	2.27e-20	1.85e-19	2.17311	NM_000314.5(PTEN);NM_000314.6(PTEN);NM_001040712.2(PTPRD);NM_001135659.1(NRXN1);NM_001166660.1(NLGN3);NM_001171025.1(PTPRD);NM_001282146.1(NLGN4X);NM_001304717.2(PTEN);NM_001304718.1(PTEN);NM_002334.3(LRP4);NM_002839.3(PTPRD);NM_004801.4(NRXN1);NM_018977.3(NLGN3);NM_020795.3(NLGN2);NM_130391.3(PTPRD);NM_130392.3(PTPRD);NM_130393.3(PTPRD);NM_138735.2(NRXN1);NM_181303.1(NLGN3);XM_005247232.1(NLGN1)…
GO:0097104	postsynaptic membrane assembly	biological_process	72	35266	87	98659	2.88e-20	2.35e-19	2.31523	NM_001135659.1(NRXN1);NM_001166660.1(NLGN3);NM_002334.3(LRP4);NM_004801.4(NRXN1);NM_015080.3(NRXN2);NM_018977.3(NLGN3);NM_020795.3(NLGN2);NM_138732.2(NRXN2);NM_138734.2(NRXN2);NM_138735.2(NRXN1);NM_181303.1(NLGN3);XM_005247232.1(NLGN1);XM_005247233.1(NLGN1);XM_005247234.1(NLGN1);XM_005247236.1(NLGN1);XM_005256744.2(NLGN2);XM_005264642.2(NRXN1);XM_005264643.2(NRXN1);XM_005274400.3(NRXN2);XM_005274…
GO:0016020	membrane	cellular_component	4098	35266	10286	98659	4.27e-20	3.48e-19	1.11457	NM_000033.3(ABCD1);NM_000034.3(ALDOA);NM_000053.3(ATP7B);NM_000084.4(CLCN5);NM_000101.3(CYBA);NM_000103.3(CYP19A1);NM_000112.3(SLC26A2);NM_000113.2(TOR1A);NM_000141.4(FGFR2);NM_000148.3(FUT1);NM_000149.3(FUT3);NM_000152.3(GAA);NM_000175.3(GPI);NM_000201.2(ICAM1);NM_000211.4(ITGB2);NM_000259.3(MYO5A);NM_000267.3(NF1);NM_000271.4(NPC1);NM_000308.2(CTSA);NM_000310.3(PPT1);NM_000398.6(CYB5R3);NM_0004…
2592.3(SYNE3);NM_152609.2(CNST);NM_152743.3(BRAT1);NM_152850.3(PIGO);NM_152855.2(IGLL1);NM_152900.2(MAGI3);NM_152904.4(SPECC1);NM_152988.2(SPPL2B);NM_152995.5(NFXL1);NM_153050.2(MTMR3);NM_153051.2(MTMR3);NM_153187.1(SLC22A1);NM_153201.3(HSPA8);NM_153253.29(SIPA1);NM_153320.2(SLC22A7);NM_153329.3(ALDH16A1);NM_153366.3(SVEP1);NM_153613.2(LPCAT4);NM_153646.3(SLC24A4);NM_153647.3(SLC24A4);NM_153648.3…
M_011524571.1(EXOC7);XM_011524572.1(EXOC7);XM_011524680.1(NKIRAS2);XM_011524681.1(NKIRAS2);XM_011524682.1(NKIRAS2);XM_011524737.1(ENPP7);XM_011524813.1(NBR1);XM_011524824.1(MPP2);XM_011524825.1(MPP2);XM_011524826.1(MPP2);XM_011524827.1(MPP2);XM_011524852.1(NF1);XM_011524853.1(NF1);XM_011524854.1(NF1);XM_011524855.1(NF1);XM_011524856.1(NF1);XM_011524857.1(NF1);XM_011524868.1(ACOX1);XM_011524873.1(…
GO:0005925	focal adhesion	cellular_component	1177	35266	2664	98659	4.37e-20	3.56e-19	1.23601	NM_000118.3(ENG);NM_000142.4(FGFR3);NM_000177.4(GSN);NM_000201.2(ICAM1);NM_000419.3(ITGA2B);NM_000425.4(L1CAM);NM_000445.4(PLEC);NM_000459.4(TEK);NM_000876.2(IGF2R);NM_000885.4(ITGA4);NM_000914.4(OPRM1);NM_000918.3(P4HB);NM_000968.3(RPL4);NM_000969.3(RPL5);NM_001001433.2(STX16);NM_001001740.3(RFWD2);NM_001004439.1(ITGA11);NM_001005360.2(DNM2);NM_001005361.2(DNM2);NM_001005362.2(DNM2);NM_001005386…
GO:0007193	adenylate cyclase-inhibiting G-protein coupled receptor signaling pathway	biological_process	142	35266	215	98659	4.69e-20	3.82e-19	1.8477	NM_000674.2(ADORA1);NM_000911.3(OPRD1);NM_000913.4(OPRL1);NM_001042465.1(PSAP);NM_001042466.1(PSAP);NM_001048230.1(ADORA1);NM_001053.3(SSTR5);NM_001114.4(ADCY7);NM_001116.3(ADCY9);NM_001166425.1(GNAI2);NM_001172560.1(SSTR5);NM_001198568.1(ADCY4);NM_001199642.1(ADCY5);NM_001200019.1(OPRL1);NM_001281768.1(ADCY1);NM_001282617.1(GNAI2);NM_001282618.1(GNAI2);NM_001282619.1(GNAI2);NM_001282620.1(GNAI2)…
GO:0005891	voltage-gated calcium channel complex	cellular_component	167	35266	265	98659	5.24e-20	4.26e-19	1.763	NM_000068.3(CACNA1A);NM_000069.2(CACNA1S);NM_000718.3(CACNA1B);NM_000719.6(CACNA1C);NM_000721.3(CACNA1E);NM_000722.3(CACNA2D1);NM_000723.4(CACNB1);NM_000724.3(CACNB2);NM_000725.3(CACNB3);NM_000727.3(CACNG1);NM_001003406.1(CACNA1I);NM_001005407.1(CACNA1H);NM_001005505.2(CACNA2D2);NM_001127221.1(CACNA1A);NM_001127222.1(CACNA1A);NM_001129827.1(CACNA1C);NM_001129829.1(CACNA1C);NM_001129830.2(CACNA1C)…
GO:0033268	node of Ranvier	cellular_component	129	35266	190	98659	5.46e-20	4.44e-19	1.8994	NM_001005388.2(NFASC);NM_001005389.1(NFASC);NM_001040142.1(SCN2A);NM_001040143.1(SCN2A);NM_001160331.1(NFASC);NM_001160332.1(NFASC);NM_001160333.1(NFASC);NM_001165928.3(DAG1);NM_001165963.1(SCN1A);NM_001165964.1(SCN1A);NM_001177634.2(DAG1);NM_001177635.2(DAG1);NM_001177636.2(DAG1);NM_001177637.2(DAG1);NM_001177638.2(DAG1);NM_001177639.2(DAG1);NM_001177640.2(DAG1);NM_001177641.2(DAG1);NM_001177642…
GO:0098911	regulation of ventricular cardiac muscle cell action potential	biological_process	61	35266	70	98659	5.71e-20	4.64e-19	2.43788	NM_000719.6(CACNA1C);NM_001008844.1(DSP);NM_001035.2(RYR2);NM_001127384.2(CTNNA3);NM_001129827.1(CACNA1C);NM_001129829.1(CACNA1C);NM_001129830.2(CACNA1C);NM_001129831.1(CACNA1C);NM_001129832.1(CACNA1C);NM_001129833.1(CACNA1C);NM_001129834.1(CACNA1C);NM_001129835.1(CACNA1C);NM_001129836.1(CACNA1C);NM_001129837.1(CACNA1C);NM_001129838.1(CACNA1C);NM_001129839.1(CACNA1C);NM_001129840.1(CACNA1C);NM_00…
GO:0045180	basal cortex	cellular_component	83	35266	106	98659	6.01e-20	4.88e-19	2.19055	NM_000162.3(GCK);NM_001134438.1(PHLDB2);NM_001142273.1(CLASP1);NM_001142274.1(CLASP1);NM_001207044.1(CLASP2);NM_001207051.1(CLASP1);NM_015097.2(CLASP2);NM_015282.2(CLASP1);NM_033507.1(GCK);NM_033508.1(GCK);NM_145753.2(PHLDB2);XM_005277680.2(PHLDB1);XM_006712373.1(CLASP1);XM_006712374.1(CLASP1);XM_006712375.1(CLASP1);XM_006712377.1(CLASP1);XM_006712381.1(CLASP1);XM_006712382.1(CLASP1);XM_006712383…
GO:0021819	layer formation in cerebral cortex	biological_process	83	35266	106	98659	6.01e-20	4.88e-19	2.19055	NM_000168.5(GLI3);NM_001145770.2(ADGRG1);NM_001145771.2(ADGRG1);NM_001145772.2(ADGRG1);NM_001145773.2(ADGRG1);NM_001145774.2(ADGRG1);NM_001146056.2(MBOAT7);NM_001146082.2(MBOAT7);NM_001146083.2(MBOAT7);NM_001290142.1(ADGRG1);NM_001290143.1(ADGRG1);NM_001290144.1(ADGRG1);NM_003936.4(CDK5R2);NM_005045.3(RELN);NM_005682.6(ADGRG1);NM_014598.3(SOCS7);NM_024298.4(MBOAT7);NM_032552.3(DAB2IP);NM_138709.2…
GO:0003016	respiratory system process	biological_process	48	35266	51	98659	6.76e-20	5.48e-19	2.633	NM_001102420.2(ZFAND5);NM_001102421.2(ZFAND5);NM_001278243.1(ZFAND5);NM_001278244.1(ZFAND5);NM_001278245.1(ZFAND5);NM_001282546.1(STK40);NM_001282547.1(STK40);NM_001290787.1(ECEL1);NM_001291415.1(KDM6A);NM_001291416.1(KDM6A);NM_001291417.1(KDM6A);NM_001291418.1(KDM6A);NM_001291421.1(KDM6A);NM_002226.4(JAG2);NM_002866.4(RAB3A);NM_004609.3(TCF15);NM_004826.3(ECEL1);NM_006007.3(ZFAND5);NM_019102.3(H…
GO:0035924	cellular response to vascular endothelial growth factor stimulus	biological_process	113	35266	160	98659	6.85e-20	5.55e-19	1.97578	NM_001014431.1(AKT1);NM_001014432.1(AKT1);NM_001024628.2(NRP1);NM_001024629.2(NRP1);NM_001025366.2(VEGFA);NM_001025367.2(VEGFA);NM_001025368.2(VEGFA);NM_001025369.2(VEGFA);NM_001025370.2(VEGFA);NM_001033756.2(VEGFA);NM_001079880.1(PRKD2);NM_001079881.1(PRKD2);NM_001079882.1(PRKD2);NM_001171622.1(VEGFA);NM_001171623.1(VEGFA);NM_001171624.1(VEGFA);NM_001171625.1(VEGFA);NM_001171626.1(VEGFA);NM_0011…
GO:0044297	cell body	cellular_component	236	35266	411	98659	1.13e-19	9.15e-19	1.60639	NM_000754.3(COMT);NM_000991.4(RPL28);NM_001008800.2(CCT3);NM_001008897.1(TCP1);NM_001012957.1(DISC1);NM_001012958.1(DISC1);NM_001012959.1(DISC1);NM_001018111.2(PODXL);NM_001037328.1(STAU1);NM_001080124.1(CASP8);NM_001080125.1(CASP8);NM_001080378.1(PACRG);NM_001123066.3(MAPT);NM_001123067.3(MAPT);NM_001131019.2(GFAP);NM_001135161.1(COMT);NM_001135162.1(COMT);NM_001136134.1(RPL28);NM_001141945.1(AC…
GO:0048011	neurotrophin TRK receptor signaling pathway	biological_process	75	35266	93	98659	1.13e-19	9.19e-19	2.2561	NM_001002261.3(ZFYVE27);NM_001002262.3(ZFYVE27);NM_001079870.1(HAP1);NM_001079871.1(HAP1);NM_001098632.2(AKT1S1);NM_001098633.3(AKT1S1);NM_001170714.1(BCAR1);NM_001170715.1(BCAR1);NM_001170716.1(BCAR1);NM_001170717.1(BCAR1);NM_001170718.1(BCAR1);NM_001170719.1(BCAR1);NM_001170720.1(BCAR1);NM_001170721.1(BCAR1);NM_001174119.1(ZFYVE27);NM_001174120.1(ZFYVE27);NM_001174121.1(ZFYVE27);NM_001174122.1(…
GO:0007030	Golgi organization	biological_process	309	35266	572	98659	1.49e-19	1.2e-18	1.51127	NM_001005855.1(ATP8B2);NM_001015048.2(BAG5);NM_001015049.2(BAG5);NM_001080491.3(USP6NL);NM_001113511.1(ARHGEF7);NM_001113512.1(ARHGEF7);NM_001113513.1(ARHGEF7);NM_001130099.1(KIFC3);NM_001130100.1(KIFC3);NM_001135662.1(RAB29);NM_001135663.1(RAB29);NM_001135664.1(RAB29);NM_001142273.1(CLASP1);NM_001142274.1(CLASP1);NM_001145036.1(COG2);NM_001146016.1(TJAP1);NM_001146017.1(TJAP1);NM_001146018.1(TJA…
GO:0042297	vocal learning	biological_process	70	35266	85	98659	1.59e-19	1.29e-18	2.30388	NM_001135659.1(NRXN1);NM_001142617.1(STRA6);NM_001142618.1(STRA6);NM_001142619.1(STRA6);NM_001142620.1(STRA6);NM_001199040.1(STRA6);NM_001199041.1(STRA6);NM_001199042.1(STRA6);NM_002111.7(HTT);NM_004801.4(NRXN1);NM_014141.5(CNTNAP2);NM_015080.3(NRXN2);NM_022369.3(STRA6);NM_033517.1(SHANK3);NM_138732.2(NRXN2);NM_138734.2(NRXN2);NM_138735.2(NRXN1);XM_005264642.2(NRXN1);XM_005264643.2(NRXN1);XM_0052…
GO:0031981	nuclear lumen	cellular_component	41	35266	42	98659	1.69e-19	1.37e-18	2.73096	NM_001038618.2(NARF);NM_001083608.1(NARF);NM_001281746.1(MLIP);NM_001281747.1(MLIP);NM_012336.3(NARF);NM_015180.4(SYNE2);NM_031968.2(NARF);NM_138569.2(MLIP);NM_182910.2(SYNE2);NM_182913.2(SYNE2);NM_182914.2(SYNE2);XM_005249476.3(MLIP);XM_005249477.3(MLIP);XM_005249478.3(MLIP);XM_005249480.3(MLIP);XM_005256340.2(NARF);XM_005267454.1(SYNE2);XM_005267456.1(SYNE2);XM_005267457.1(SYNE2);XM_005267458.1…
GO:0010881	regulation of cardiac muscle contraction by regulation of the release of sequestered calcium ion	biological_process	115	35266	165	98659	1.83e-19	1.48e-18	1.94982	NM_000109.3(DMD);NM_000702.3(ATP1A2);NM_000719.6(CACNA1C);NM_001035.2(RYR2);NM_001112800.1(SLC8A1);NM_001112801.1(SLC8A1);NM_001112802.1(SLC8A1);NM_001127493.1(ANK2);NM_001129827.1(CACNA1C);NM_001129829.1(CACNA1C);NM_001129830.2(CACNA1C);NM_001129831.1(CACNA1C);NM_001129832.1(CACNA1C);NM_001129833.1(CACNA1C);NM_001129834.1(CACNA1C);NM_001129835.1(CACNA1C);NM_001129836.1(CACNA1C);NM_001129837.1(CA…
GO:0008093	cytoskeletal adaptor activity	molecular_function	152	35266	237	98659	1.86e-19	1.5e-18	1.79422	NM_000037.3(ANK1);NM_001003398.1(BICD1);NM_001004720.2(NCK2);NM_001127493.1(ANK2);NM_001142445.1(ANK1);NM_001142446.1(ANK1);NM_001144888.1(BAIAP2);NM_001145670.1(SORBS2);NM_001145671.2(SORBS2);NM_001145672.1(SORBS2);NM_001145673.1(SORBS2);NM_001145674.1(SORBS2);NM_001145675.1(SORBS2);NM_001148.4(ANK2);NM_001173408.1(OBSL1);NM_001173431.1(OBSL1);NM_001270771.1(SORBS2);NM_001278730.1(GAS2L1);NM_001…
GO:0007275	multicellular organism development	biological_process	1211	35266	2760	98659	1.95e-19	1.57e-18	1.22748	NM_000299.3(PKP1);NM_000365.5(TPI1);NM_000523.3(HOXD13);NM_000546.5(TP53);NM_000612.5(IGF2);NM_000678.3(ADRA1D);NM_000679.3(ADRA1B);NM_001003698.3(RREB1);NM_001003699.3(RREB1);NM_001003700.1(RREB1);NM_001003795.2(GTF2IRD2B);NM_001005209.2(TMEM198);NM_001005337.2(PKP1);NM_001005463.2(EBF3);NM_001007139.5(IGF2);NM_001007538.1(SHISA2);NM_001008496.3(PIWIL3);NM_001008781.2(FAT3);NM_001009811.2(CEP131…
GO:0060982	coronary artery morphogenesis	biological_process	49	35266	53	98659	2.88e-19	2.32e-18	2.58643	NM_001024628.2(NRP1);NM_001024629.2(NRP1);NM_001025366.2(VEGFA);NM_001025367.2(VEGFA);NM_001025368.2(VEGFA);NM_001025369.2(VEGFA);NM_001025370.2(VEGFA);NM_001033756.2(VEGFA);NM_001042734.2(SEC24B);NM_001171622.1(VEGFA);NM_001171623.1(VEGFA);NM_001171624.1(VEGFA);NM_001171625.1(VEGFA);NM_001171626.1(VEGFA);NM_001171627.1(VEGFA);NM_001171628.1(VEGFA);NM_001171629.1(VEGFA);NM_001171630.1(VEGFA);NM_0…
GO:2001046	positive regulation of integrin-mediated signaling pathway	biological_process	49	35266	53	98659	2.88e-19	2.32e-18	2.58643	NM_001110556.1(FLNA);NM_001114135.3(DMTN);NM_001114136.2(DMTN);NM_001114137.2(DMTN);NM_001114138.2(DMTN);NM_001114139.2(DMTN);NM_001136037.2(LIMS2);NM_001161403.1(LIMS2);NM_001161404.1(LIMS2);NM_001256542.1(LIMS2);NM_001257389.1(CD63);NM_001257390.1(CD63);NM_001257391.1(CD63);NM_001257392.1(CD63);NM_001257400.1(CD63);NM_001257401.1(CD63);NM_001267698.1(CD63);NM_001302816.1(DMTN);NM_001302817.1(DM…
GO:0006887	exocytosis	biological_process	277	35266	503	98659	3.11e-19	2.51e-18	1.54061	NM_000037.3(ANK1);NM_000160.4(GCGR);NM_000259.3(MYO5A);NM_001008274.3(TRIM72);NM_001013839.3(EXOC7);NM_001015002.1(LLGL2);NM_001024924.1(EXOC1);NM_001031803.1(LLGL2);NM_001077594.1(EXOC3L4);NM_001079870.1(HAP1);NM_001079871.1(HAP1);NM_001122731.2(MICAL3);NM_001136004.3(MICAL3);NM_001142445.1(ANK1);NM_001142446.1(ANK1);NM_001142495.1(MYO5A);NM_001145297.3(EXOC7);NM_001145298.3(EXOC7);NM_001145299.…
GO:0055003	cardiac myofibril assembly	biological_process	66	35266	79	98659	3.16e-19	2.54e-18	2.33721	NM_001173408.1(OBSL1);NM_001173431.1(OBSL1);NM_001256012.1(MYH10);NM_001256095.1(MYH10);NM_001256850.1(TTN);NM_001267550.2(TTN);NM_001281739.1(FHOD3);NM_001281740.1(FHOD3);NM_002609.3(PDGFRB);NM_003319.4(TTN);NM_005159.4(ACTC1);NM_005964.3(MYH10);NM_006206.4(PDGFRA);NM_015311.2(OBSL1);NM_025135.3(FHOD3);NM_133378.4(TTN);NM_133432.3(TTN);NM_133437.4(TTN);NM_182493.2(MYLK3);XM_005246424.3(OBSL1);XM…
GO:0010470	regulation of gastrulation	biological_process	95	35266	129	98659	3.96e-19	3.19e-18	2.06022	NM_001134438.1(PHLDB2);NM_001142273.1(CLASP1);NM_001142274.1(CLASP1);NM_001165928.3(DAG1);NM_001177634.2(DAG1);NM_001177635.2(DAG1);NM_001177636.2(DAG1);NM_001177637.2(DAG1);NM_001177638.2(DAG1);NM_001177639.2(DAG1);NM_001177640.2(DAG1);NM_001177641.2(DAG1);NM_001177642.2(DAG1);NM_001177643.2(DAG1);NM_001177644.2(DAG1);NM_001207044.1(CLASP2);NM_001207051.1(CLASP1);NM_004393.5(DAG1);NM_015097.2(CL…
GO:0007155	cell adhesion	biological_process	1064	35266	2397	98659	5.04e-19	4.05e-18	1.24181	NM_000091.4(COL4A3);NM_000093.4(COL5A1);NM_000094.3(COL7A1);NM_000095.2(COMP);NM_000104.3(CYP1B1);NM_000113.2(TOR1A);NM_000118.3(ENG);NM_000201.2(ICAM1);NM_000211.4(ITGB2);NM_000227.4(LAMA3);NM_000228.2(LAMB3);NM_000299.3(PKP1);NM_000322.4(PRPH2);NM_000407.4(GP1BB);NM_000419.3(ITGA2B);NM_000425.4(L1CAM);NM_000442.4(PECAM1);NM_000484.3(APP);NM_000552.3(VWF);NM_000609.6(CXCL12);NM_000615.6(NCAM1);N…
GO:0030154	cell differentiation	biological_process	1109	35266	2511	98659	5.94e-19	4.77e-18	1.23556	NM_000546.5(TP53);NM_000757.5(CSF1);NM_001003954.1(ANXA13);NM_001007468.1(SMARCB1);NM_001008220.1(CPLX2);NM_001008496.3(PIWIL3);NM_001009811.2(CEP131);NM_001010870.2(TDRD6);NM_001010938.1(TNK2);NM_001014431.1(AKT1);NM_001014432.1(AKT1);NM_001017995.2(SH3PXD2B);NM_001033576.1(UNC45B);NM_001034852.2(SMOC1);NM_001037165.1(FOXK1);NM_001039467.1(RGS19);NM_001039592.1(SPAG8);NM_001039656.1(MTL5);NM_001…
GO:0030182	neuron differentiation	biological_process	312	35266	584	98659	8.73e-19	7.01e-18	1.49459	NM_001001331.2(ATP2B2);NM_001005861.2(RYK);NM_001007097.2(NTRK2);NM_001012514.2(ITM2C);NM_001012516.2(ITM2C);NM_001015051.3(RUNX2);NM_001015053.1(HDAC5);NM_001018065.2(NTRK2);NM_001018066.2(NTRK2);NM_001024630.3(RUNX2);NM_001040712.2(PTPRD);NM_001080408.2(PROX2);NM_001098416.2(HDAC7);NM_001113239.2(HIPK2);NM_001130823.1(DNMT1);NM_001131005.2(MEF2C);NM_001160372.2(TRAPPC9);NM_001165924.1(EMX2);NM_…
GO:0008331	high voltage-gated calcium channel activity	molecular_function	85	35266	112	98659	8.83e-19	7.08e-18	2.12315	NM_000068.3(CACNA1A);NM_000069.2(CACNA1S);NM_000718.3(CACNA1B);NM_000719.6(CACNA1C);NM_000721.3(CACNA1E);NM_000723.4(CACNB1);NM_000724.3(CACNB2);NM_000725.3(CACNB3);NM_001127221.1(CACNA1A);NM_001127222.1(CACNA1A);NM_001129827.1(CACNA1C);NM_001129829.1(CACNA1C);NM_001129830.2(CACNA1C);NM_001129831.1(CACNA1C);NM_001129832.1(CACNA1C);NM_001129833.1(CACNA1C);NM_001129834.1(CACNA1C);NM_001129835.1(CAC…
GO:0061577	calcium ion transmembrane transport via high voltage-gated calcium channel	biological_process	50	35266	55	98659	9.73e-19	7.8e-18	2.54324	NM_000719.6(CACNA1C);NM_000722.3(CACNA2D1);NM_000725.3(CACNB3);NM_001129827.1(CACNA1C);NM_001129829.1(CACNA1C);NM_001129830.2(CACNA1C);NM_001129831.1(CACNA1C);NM_001129832.1(CACNA1C);NM_001129833.1(CACNA1C);NM_001129834.1(CACNA1C);NM_001129835.1(CACNA1C);NM_001129836.1(CACNA1C);NM_001129837.1(CACNA1C);NM_001129838.1(CACNA1C);NM_001129839.1(CACNA1C);NM_001129840.1(CACNA1C);NM_001129841.1(CACNA1C);…
GO:0014733	regulation of skeletal muscle adaptation	biological_process	54	35266	61	98659	1.08e-18	8.68e-18	2.47653	NM_001204492.1(CAMK2G);NM_001220.4(CAMK2B);NM_001222.3(CAMK2G);NM_001293170.1(CAMK2B);NM_172078.2(CAMK2B);NM_172079.2(CAMK2B);NM_172080.2(CAMK2B);NM_172081.2(CAMK2B);NM_172082.2(CAMK2B);NM_172083.2(CAMK2B);NM_172084.2(CAMK2B);NM_172169.2(CAMK2G);NM_172170.4(CAMK2G);NM_172171.2(CAMK2G);NM_172173.2(CAMK2G);XM_005249862.3(CAMK2B);XM_005249864.3(CAMK2B);XM_005270195.1(CAMK2G);XM_005270197.1(CAMK2G);X…
GO:0003779	actin binding	molecular_function	1031	35266	2320	98659	1.18e-18	9.45e-18	1.24323	NM_000034.3(ALDOA);NM_000109.3(DMD);NM_000177.4(GSN);NM_000243.2(MEFV);NM_000257.3(MYH7);NM_000259.3(MYO5A);NM_000342.3(SLC4A1);NM_000347.5(SPTB);NM_000363.4(TNNI3);NM_000445.4(PLEC);NM_000789.3(ACE);NM_001008493.1(ENAH);NM_001011513.3(PDLIM5);NM_001011515.2(PDLIM5);NM_001011516.2(PDLIM5);NM_001013253.1(LSP1);NM_001014436.2(DBNL);NM_001014797.2(KCNMA1);NM_001024858.2(SPTB);NM_001038.5(SCNN1A);NM_…
GO:0097451	glial limiting end-foot	cellular_component	45	35266	48	98659	1.31e-18	1.05e-17	2.62272	NM_001145770.2(ADGRG1);NM_001145771.2(ADGRG1);NM_001145772.2(ADGRG1);NM_001145773.2(ADGRG1);NM_001145774.2(ADGRG1);NM_001290142.1(ADGRG1);NM_001290143.1(ADGRG1);NM_001290144.1(ADGRG1);NM_005682.6(ADGRG1);NM_201524.3(ADGRG1);NM_201525.3(ADGRG1);XM_005256237.1(ADGRG1);XM_005256238.1(ADGRG1);XM_005256239.1(ADGRG1);XM_005256240.3(ADGRG1);XM_005256241.3(ADGRG1);XM_005256242.3(ADGRG1);XM_005256244.2(AD…
GO:0030574	collagen catabolic process	biological_process	217	35266	376	98659	1.33e-18	1.06e-17	1.61455	NM_000088.3(COL1A1);NM_000091.4(COL4A3);NM_000092.4(COL4A4);NM_000093.4(COL5A1);NM_000094.3(COL7A1);NM_000285.3(PEPD);NM_000493.3(COL10A1);NM_000495.4(COL4A5);NM_001102608.1(COL6A6);NM_001166056.1(PEPD);NM_001166057.1(PEPD);NM_001190709.1(COL11A1);NM_001199739.1(CTSS);NM_001278074.1(COL5A1);NM_001278298.1(COL6A5);NM_001278563.2(COL26A1);NM_001287758.1(COL4A6);NM_001287759.1(COL4A6);NM_001287760.1…
GO:0030198	extracellular matrix organization	biological_process	534	35266	1102	98659	1.44e-18	1.15e-17	1.35563	NM_000088.3(COL1A1);NM_000091.4(COL4A3);NM_000092.4(COL4A4);NM_000093.4(COL5A1);NM_000094.3(COL7A1);NM_000095.2(COMP);NM_000138.4(FBN1);NM_000201.2(ICAM1);NM_000211.4(ITGB2);NM_000227.4(LAMA3);NM_000228.2(LAMB3);NM_000267.3(NF1);NM_000346.3(SOX9);NM_000371.3(TTR);NM_000400.3(ERCC2);NM_000419.3(ITGA2B);NM_000442.4(PECAM1);NM_000484.3(APP);NM_000493.3(COL10A1);NM_000495.4(COL4A5);NM_000501.3(ELN);N…
GO:0060124	positive regulation of growth hormone secretion	biological_process	79	35266	102	98659	1.45e-18	1.16e-17	2.16674	NM_000795.3(DRD2);NM_001099733.1(ADCYAP1);NM_001113511.1(ARHGEF7);NM_001113512.1(ARHGEF7);NM_001113513.1(ARHGEF7);NM_001117.4(ADCYAP1);NM_001134941.2(GHRL);NM_001134944.1(GHRL);NM_001134945.1(GHRL);NM_001134946.1(GHRL);NM_001302821.1(GHRL);NM_001302822.1(GHRL);NM_001302823.1(GHRL);NM_001302824.1(GHRL);NM_001302825.1(GHRL);NM_001470.2(GABBR1);NM_003899.3(ARHGEF7);NM_016362.4(GHRL);NM_016574.3(DRD2…
GO:0035791	platelet-derived growth factor receptor-beta signaling pathway	biological_process	42	35266	44	98659	1.73e-18	1.38e-17	2.6704	NM_001207044.1(CLASP2);NM_001278618.1(PTPN1);NM_002609.3(PDGFRB);NM_002827.3(PTPN1);NM_005157.5(ABL1);NM_007313.2(ABL1);NM_015097.2(CLASP2);XM_005268464.2(PDGFRB);XM_006713036.1(CLASP2);XM_006713040.1(CLASP2);XM_006713041.1(CLASP2);XM_006713042.1(CLASP2);XM_006713048.1(CLASP2);XM_006713049.1(CLASP2);XM_006713050.1(CLASP2);XM_006713052.1(CLASP2);XM_006713053.1(CLASP2);XM_006713056.1(CLASP2);XM_006…
GO:0007626	locomotory behavior	biological_process	264	35266	479	98659	1.74e-18	1.39e-17	1.54187	NM_000152.3(GAA);NM_000314.5(PTEN);NM_000314.6(PTEN);NM_000360.3(TH);NM_000484.3(APP);NM_000490.4(AVP);NM_000718.3(CACNA1B);NM_000743.4(CHRNA3);NM_000744.6(CHRNA4);NM_000795.3(DRD2);NM_000796.5(DRD3);NM_000914.4(OPRM1);NM_001001331.2(ATP2B2);NM_001044.4(SLC6A3);NM_001079803.1(GAA);NM_001079804.1(GAA);NM_001098169.1(BSX);NM_001110792.1(MECP2);NM_001111018.1(NAV2);NM_001111019.2(NAV2);NM_001130967.…
GO:2000179	positive regulation of neural precursor cell proliferation	biological_process	73	35266	92	98659	1.97e-18	1.57e-17	2.21981	NM_001145770.2(ADGRG1);NM_001145771.2(ADGRG1);NM_001145772.2(ADGRG1);NM_001145773.2(ADGRG1);NM_001145774.2(ADGRG1);NM_001270616.1(PROX1);NM_001290142.1(ADGRG1);NM_001290143.1(ADGRG1);NM_001290144.1(ADGRG1);NM_002196.2(INSM1);NM_002763.4(PROX1);NM_005274.2(GNG5);NM_005682.6(ADGRG1);NM_006617.1(NES);NM_019074.3(DLL4);NM_020890.2(KIAA1524);NM_025165.2(ELL3);NM_033131.3(WNT3A);NM_201524.3(ADGRG1);NM_…
GO:0051693	actin filament capping	biological_process	89	35266	120	98659	2.1e-18	1.67e-17	2.07486	NM_000177.4(GSN);NM_000347.5(SPTB);NM_001024858.2(SPTB);NM_001114135.3(DMTN);NM_001114136.2(DMTN);NM_001114137.2(DMTN);NM_001114138.2(DMTN);NM_001114139.2(DMTN);NM_001127662.1(GSN);NM_001127663.1(GSN);NM_001127664.1(GSN);NM_001127665.1(GSN);NM_001127666.1(GSN);NM_001127667.1(GSN);NM_001130438.2(SPTAN1);NM_001195532.1(SPTAN1);NM_001258029.1(GSN);NM_001258030.1(GSN);NM_001302816.1(DMTN);NM_00130281…
GO:0001525	angiogenesis	biological_process	600	35266	1262	98659	2.13e-18	1.7e-17	1.33006	NM_000104.3(CYP1B1);NM_000141.4(FGFR2);NM_000175.3(GPI);NM_000314.5(PTEN);NM_000314.6(PTEN);NM_000459.4(TEK);NM_000603.4(NOS3);NM_000922.3(PDE3B);NM_001010855.3(PIK3R6);NM_001013406.1(KRIT1);NM_001024628.2(NRP1);NM_001024629.2(NRP1);NM_001025366.2(VEGFA);NM_001025367.2(VEGFA);NM_001025368.2(VEGFA);NM_001025369.2(VEGFA);NM_001025370.2(VEGFA);NM_001033756.2(VEGFA);NM_001039667.2(ANGPTL4);NM_0010776…
GO:0005088	Ras guanyl-nucleotide exchange factor activity	molecular_function	386	35266	756	98659	2.25e-18	1.79e-17	1.42839	NM_000141.4(FGFR2);NM_000142.4(FGFR3);NM_000215.3(JAK3);NM_000347.5(SPTB);NM_000395.2(CSF2RB);NM_000417.2(IL2RA);NM_000459.4(TEK);NM_000615.6(NCAM1);NM_000835.4(GRIN2C);NM_000836.2(GRIN2D);NM_000878.3(IL2RB);NM_000899.4(KITLG);NM_001024858.2(SPTB);NM_001100397.1(RAPGEF4);NM_001128827.1(DLG4);NM_001130040.1(SHC1);NM_001130041.1(SHC1);NM_001130438.2(SPTAN1);NM_001134407.2(GRIN2A);NM_001136215.1(ART…
GO:0000146	microfilament motor activity	molecular_function	86	35266	115	98659	2.97e-18	2.36e-17	2.09209	NM_000257.3(MYH7);NM_000259.3(MYO5A);NM_000260.3(MYO7A);NM_001077186.1(MYH14);NM_001080467.2(MYO5B);NM_001100112.1(MYH2);NM_001127179.2(MYO7A);NM_001127180.1(MYO7A);NM_001130065.1(MYO9B);NM_001142495.1(MYO5A);NM_001145809.1(MYH14);NM_001256012.1(MYH10);NM_001256095.1(MYH10);NM_001303279.1(MYO1D);NM_001303280.1(MYO1D);NM_002470.3(MYH3);NM_002472.2(MYH8);NM_002473.5(MYH9);NM_004145.3(MYO9B);NM_0049…
GO:0005828	kinetochore microtubule	cellular_component	60	35266	71	98659	3.3e-18	2.62e-17	2.36414	NM_001142273.1(CLASP1);NM_001142274.1(CLASP1);NM_001207044.1(CLASP2);NM_001207051.1(CLASP1);NM_015097.2(CLASP2);NM_015282.2(CLASP1);XM_006712373.1(CLASP1);XM_006712374.1(CLASP1);XM_006712375.1(CLASP1);XM_006712377.1(CLASP1);XM_006712381.1(CLASP1);XM_006712382.1(CLASP1);XM_006712383.1(CLASP1);XM_006712385.1(CLASP1);XM_006713036.1(CLASP2);XM_006713040.1(CLASP2);XM_006713041.1(CLASP2);XM_006713042.1…
GO:0033613	activating transcription factor binding	molecular_function	144	35266	226	98659	3.64e-18	2.89e-17	1.78252	NM_001003652.3(SMAD2);NM_001098416.2(HDAC7);NM_001128217.1(PSIP1);NM_001130053.2(EEF1D);NM_001130055.2(EEF1D);NM_001131005.2(MEF2C);NM_001135937.2(SMAD2);NM_001145853.1(WFS1);NM_001193347.1(MEF2C);NM_001193348.1(MEF2C);NM_001193349.1(MEF2C);NM_001193350.1(MEF2C);NM_001199699.1(DHX33);NM_001271629.1(MEF2D);NM_001347.3(DGKQ);NM_001429.3(EP300);NM_002052.3(GATA4);NM_002397.4(MEF2C);NM_005901.5(SMAD2…
GO:0030544	Hsp70 protein binding	molecular_function	206	35266	355	98659	3.98e-18	3.16e-17	1.62338	NM_001039550.1(DNAJB2);NM_001080378.1(PACRG);NM_001098534.1(BAG6);NM_001193357.1(NUP62);NM_001199697.1(BAG6);NM_001199698.1(BAG6);NM_001278589.1(ST13);NM_001293557.1(NOD2);NM_001433.3(ERN1);NM_003932.4(ST13);NM_004064.4(CDKN1B);NM_004639.3(BAG6);NM_006736.5(DNAJB2);NM_012346.4(NUP62);NM_016553.4(NUP62);NM_022162.2(NOD2);NM_080702.2(BAG6);NM_080703.2(BAG6);NM_152410.2(PACRG);NM_153718.3(NUP62);NM_…
GO:0006816	calcium ion transport	biological_process	253	35266	457	98659	4e-18	3.17e-17	1.54876	NM_000069.2(CACNA1S);NM_000540.2(RYR1);NM_000722.3(CACNA2D1);NM_000725.3(CACNB3);NM_000744.6(CHRNA4);NM_000746.5(CHRNA7);NM_000785.3(CYP27B1);NM_000905.3(NPY);NM_000944.4(PPP3CA);NM_001001331.2(ATP2B2);NM_001012662.2(SLC3A2);NM_001012664.2(SLC3A2);NM_001013251.2(SLC3A2);NM_001035.2(RYR2);NM_001036.4(RYR3);NM_001042723.1(RYR1);NM_001130691.1(PPP3CA);NM_001130692.1(PPP3CA);NM_001155.4(ANXA6);NM_001…
GO:0042771	intrinsic apoptotic signaling pathway in response to DNA damage by p53 class mediator	biological_process	224	35266	394	98659	4.5e-18	3.57e-17	1.59049	NM_000546.5(TP53);NM_001042483.1(NUPR1);NM_001098534.1(BAG6);NM_001113239.2(HIPK2);NM_001126112.2(TP53);NM_001126113.2(TP53);NM_001126114.2(TP53);NM_001126115.1(TP53);NM_001126116.1(TP53);NM_001126117.1(TP53);NM_001126118.1(TP53);NM_001199054.1(CDIP1);NM_001199055.1(CDIP1);NM_001199056.1(CDIP1);NM_001199697.1(BAG6);NM_001199698.1(BAG6);NM_001276695.1(TP53);NM_001276696.1(TP53);NM_001276697.1(TP53…
GO:0090286	cytoskeletal anchoring at nuclear membrane	biological_process	66	35266	81	98659	4.74e-18	3.75e-17	2.2795	NM_001130965.2(SUN1);NM_001171944.1(SUN1);NM_001171945.1(SUN1);NM_001171946.1(SUN1);NM_001199579.1(SUN2);NM_001199580.1(SUN2);NM_003116.1(SPAG4);NM_015180.4(SYNE2);NM_015374.2(SUN2);NM_025154.5(SUN1);NM_152592.3(SYNE3);NM_182910.2(SYNE2);NM_182913.2(SYNE2);NM_182914.2(SYNE2);XM_005260519.3(SPAG4);XM_005260520.3(SPAG4);XM_005267376.3(SYNE3);XM_005267377.2(SYNE3);XM_005267454.1(SYNE2);XM_005267456.…
GO:0050840	extracellular matrix binding	molecular_function	96	35266	134	98659	6.47e-18	5.12e-17	2.00423	NM_000419.3(ITGA2B);NM_000638.3(VTN);NM_001004019.1(FBLN2);NM_001025366.2(VEGFA);NM_001025367.2(VEGFA);NM_001025368.2(VEGFA);NM_001025369.2(VEGFA);NM_001025370.2(VEGFA);NM_001033756.2(VEGFA);NM_001079911.2(DMP1);NM_001144950.1(SSC5D);NM_001145770.2(ADGRG1);NM_001145771.2(ADGRG1);NM_001145772.2(ADGRG1);NM_001145773.2(ADGRG1);NM_001145774.2(ADGRG1);NM_001165035.1(FBLN2);NM_001171622.1(VEGFA);NM_001…
GO:1902306	negative regulation of sodium ion transmembrane transport	biological_process	48	35266	53	98659	6.56e-18	5.19e-17	2.53365	NM_001144964.1(NEDD4L);NM_001144965.1(NEDD4L);NM_001144966.2(NEDD4L);NM_001144967.2(NEDD4L);NM_001144968.1(NEDD4L);NM_001144969.1(NEDD4L);NM_001144970.2(NEDD4L);NM_001144971.1(NEDD4L);NM_001221.3(CAMK2D);NM_001243960.1(NEDD4L);NM_015277.5(NEDD4L);NM_152516.2(COMMD1);NM_172114.1(CAMK2D);NM_172115.2(CAMK2D);NM_172127.2(CAMK2D);NM_172128.2(CAMK2D);NM_172129.1(CAMK2D);XM_005263251.3(CAMK2D);XM_005263…
GO:0005578	proteinaceous extracellular matrix	cellular_component	498	35266	1025	98659	1.05e-17	8.28e-17	1.35921	NM_000095.2(COMP);NM_000138.4(FBN1);NM_000362.4(TIMP3);NM_000428.2(LTBP2);NM_000478.4(ALPL);NM_000493.3(COL10A1);NM_000501.3(ELN);NM_000552.3(VWF);NM_000638.3(VTN);NM_001004019.1(FBLN2);NM_001008697.1(TFIP11);NM_001014447.2(CPZ);NM_001014448.2(CPZ);NM_001025366.2(VEGFA);NM_001025367.2(VEGFA);NM_001025368.2(VEGFA);NM_001025369.2(VEGFA);NM_001025370.2(VEGFA);NM_001032278.2(MMP28);NM_001033047.2(NPN…
GO:0044295	axonal growth cone	cellular_component	130	35266	200	98659	1.17e-17	9.2e-17	1.81842	NM_000264.3(PTCH1);NM_000425.4(L1CAM);NM_001037281.1(PARD6A);NM_001083602.1(PTCH1);NM_001083603.1(PTCH1);NM_001083604.1(PTCH1);NM_001083605.1(PTCH1);NM_001083606.1(PTCH1);NM_001083607.1(PTCH1);NM_001127511.2(APC);NM_001135659.1(NRXN1);NM_001143963.2(L1CAM);NM_001204426.1(LIMK1);NM_001207044.1(CLASP2);NM_001278116.1(L1CAM);NM_001287436.1(COBL);NM_001287438.1(COBL);NM_001301861.1(BOC);NM_001301867.…
GO:0010634	positive regulation of epithelial cell migration	biological_process	130	35266	200	98659	1.17e-17	9.2e-17	1.81842	NM_000346.3(SOX9);NM_001003698.3(RREB1);NM_001003699.3(RREB1);NM_001003700.1(RREB1);NM_001024847.2(TGFBR2);NM_001142273.1(CLASP1);NM_001142274.1(CLASP1);NM_001168344.1(RREB1);NM_001204.6(BMPR2);NM_001207044.1(CLASP2);NM_001207051.1(CLASP1);NM_001287010.1(GLIPR2);NM_001287011.1(GLIPR2);NM_001287012.1(GLIPR2);NM_002204.2(ITGA3);NM_002660.2(PLCG1);NM_003242.5(TGFBR2);NM_005022.3(PFN1);NM_005400.2(PR…
GO:2000650	negative regulation of sodium ion transmembrane transporter activity	biological_process	66	35266	82	98659	1.68e-17	1.33e-16	2.2517	NM_000029.3(AGT);NM_001144964.1(NEDD4L);NM_001144965.1(NEDD4L);NM_001144966.2(NEDD4L);NM_001144967.2(NEDD4L);NM_001144968.1(NEDD4L);NM_001144969.1(NEDD4L);NM_001144970.2(NEDD4L);NM_001144971.1(NEDD4L);NM_001221.3(CAMK2D);NM_001243960.1(NEDD4L);NM_005400.2(PRKCE);NM_015277.5(NEDD4L);NM_172114.1(CAMK2D);NM_172115.2(CAMK2D);NM_172127.2(CAMK2D);NM_172128.2(CAMK2D);NM_172129.1(CAMK2D);NM_174936.3(PCSK…
GO:0030027	lamellipodium	cellular_component	583	35266	1231	98659	1.69e-17	1.33e-16	1.32492	NM_000177.4(GSN);NM_000243.2(MEFV);NM_001005360.2(DNM2);NM_001005361.2(DNM2);NM_001005362.2(DNM2);NM_001006624.1(PDPN);NM_001006625.1(PDPN);NM_001008493.1(ENAH);NM_001010927.2(TIAM2);NM_001013838.1(RLTPR);NM_001014436.2(DBNL);NM_001018111.2(PODXL);NM_001018138.1(NME2);NM_001042663.1(PLEKHG5);NM_001042664.1(PLEKHG5);NM_001042665.1(PLEKHG5);NM_001048183.1(PHACTR4);NM_001080855.2(PXN);NM_001085377.1…
GO:0000379	tRNA-type intron splice site recognition and cleavage	biological_process	51	35266	58	98659	1.74e-17	1.37e-16	2.45993	NM_001077446.3(TSEN34);NM_001145392.1(TSEN2);NM_001145393.1(TSEN2);NM_001145395.1(TSEN2);NM_001282332.1(TSEN34);NM_001282333.1(TSEN34);NM_024075.4(TSEN34);NM_025265.3(TSEN2);NM_207346.2(TSEN54);XM_005257229.2(TSEN54);XM_005259241.3(TSEN34);XM_005265495.1(TSEN2);XM_005265497.1(TSEN2);XM_005265498.1(TSEN2);XM_005265499.2(TSEN2);XM_005277087.3(TSEN34);XM_005277276.3(TSEN34);XM_005278290.3(TSEN34);XM…
GO:0086016	AV node cell action potential	biological_process	49	35266	55	98659	1.81e-17	1.42e-16	2.49238	NM_000335.4(SCN5A);NM_001099404.1(SCN5A);NM_001099405.1(SCN5A);NM_001142348.1(SCN4B);NM_001142349.1(SCN4B);NM_001160160.1(SCN5A);NM_001160161.1(SCN5A);NM_001256324.1(CACNA1G);NM_001256325.1(CACNA1G);NM_001256326.1(CACNA1G);NM_001256327.1(CACNA1G);NM_001256328.1(CACNA1G);NM_001256329.1(CACNA1G);NM_001256330.1(CACNA1G);NM_001256331.1(CACNA1G);NM_001256332.1(CACNA1G);NM_001256333.1(CACNA1G);NM_00125…
GO:0071625	vocalization behavior	biological_process	110	35266	162	98659	2.3e-17	1.81e-16	1.89958	NM_001077186.1(MYH14);NM_001105250.2(NRXN3);NM_001128827.1(DLG4);NM_001135659.1(NRXN1);NM_001145809.1(MYH14);NM_001166660.1(NLGN3);NM_001272020.1(NRXN3);NM_001282146.1(NLGN4X);NM_001365.3(DLG4);NM_004796.5(NRXN3);NM_004801.4(NRXN1);NM_012309.4(SHANK2);NM_014141.5(CNTNAP2);NM_014467.2(SRPX2);NM_015080.3(NRXN2);NM_016148.2(SHANK1);NM_018977.3(NLGN3);NM_024729.3(MYH14);NM_033517.1(SHANK3);NM_133266.…
GO:1902459	positive regulation of stem cell population maintenance	biological_process	36	35266	37	98659	2.91e-17	2.29e-16	2.72196	NM_001005366.1(KDM2B);NM_001130145.2(YAP1);NM_001195044.1(YAP1);NM_001195045.1(YAP1);NM_001282097.1(YAP1);NM_001282098.1(YAP1);NM_001282099.1(YAP1);NM_001282100.1(YAP1);NM_001282101.1(YAP1);NM_006106.4(YAP1);NM_032590.4(KDM2B);XM_005253955.2(KDM2B);XM_005253956.2(KDM2B);XM_005253961.3(KDM2B);XM_005271378.2(YAP1);XM_005271380.2(YAP1);XM_005271381.2(YAP1);XM_005271383.2(YAP1);XM_011538860.1(KDM2B);…
GO:0008134	transcription factor binding	molecular_function	806	35266	1780	98659	2.99e-17	2.35e-16	1.26676	NM_000044.3(AR);NM_000077.4(CDKN2A);NM_000192.3(TBX5);NM_000209.3(PDX1);NM_000278.3(PAX2);NM_000325.5(PITX2);NM_000474.3(TWIST1);NM_000475.4(NR0B1);NM_000546.5(TP53);NM_000633.2(BCL2);NM_000964.3(RARA);NM_001001890.2(RUNX1);NM_001002295.1(GATA3);NM_001003652.3(SMAD2);NM_001011645.2(AR);NM_001011658.3(TRAPPC2);NM_001012614.1(CTBP1);NM_001015053.1(HDAC5);NM_001018003.2(SORBS3);NM_001024809.3(RARA);…
GO:0001540	beta-amyloid binding	molecular_function	151	35266	244	98659	3.07e-17	2.41e-16	1.73128	NM_000099.3(CST3);NM_000665.4(ACHE);NM_000746.5(CHRNA7);NM_001004051.3(GPRASP2);NM_001009566.2(CLSTN1);NM_001012514.2(ITM2C);NM_001012516.2(ITM2C);NM_001080418.2(DLGAP3);NM_001163.3(APBA1);NM_001164.4(APBB1);NM_001166050.1(APBB2);NM_001184874.2(GPRASP2);NM_001184875.2(GPRASP2);NM_001184876.2(GPRASP2);NM_001190455.2(CHRNA7);NM_001199818.1(ARMCX5-GPRASP2);NM_001257319.2(APBB1);NM_001257320.2(APBB1)…
GO:0007161	calcium-independent cell-matrix adhesion	biological_process	54	35266	63	98659	3.19e-17	2.51e-16	2.39791	NM_000296.3(PKD1);NM_001009944.2(PKD1);NM_001272046.1(VWA2);NM_002026.2(FN1);NM_054034.2(FN1);NM_212474.1(FN1);NM_212476.1(FN1);NM_212478.1(FN1);NM_212482.1(FN1);XM_005246397.1(FN1);XM_005246398.1(FN1);XM_005246399.1(FN1);XM_005246400.1(FN1);XM_005246401.1(FN1);XM_005246402.1(FN1);XM_005246403.1(FN1);XM_005246404.1(FN1);XM_005246405.1(FN1);XM_005246406.1(FN1);XM_005246407.1(FN1);XM_005246408.1(FN…
GO:0007416	synapse assembly	biological_process	229	35266	410	98659	3.42e-17	2.68e-16	1.56254	NM_000068.3(CACNA1A);NM_000314.5(PTEN);NM_000314.6(PTEN);NM_000665.4(ACHE);NM_000795.3(DRD2);NM_001001715.3(FARP1);NM_001005861.2(RYK);NM_001014436.2(DBNL);NM_001105250.2(NRXN3);NM_001110792.1(MECP2);NM_001122956.1(DBNL);NM_001127221.1(CACNA1A);NM_001127222.1(CACNA1A);NM_001135659.1(NRXN1);NM_001136127.2(DNM3);NM_001143805.1(BDNF);NM_001143806.1(BDNF);NM_001143807.1(BDNF);NM_001143808.1(BDNF);NM_…
GO:0043184	vascular endothelial growth factor receptor 2 binding	molecular_function	39	35266	41	98659	3.54e-17	2.78e-16	2.6611	NM_001025366.2(VEGFA);NM_001025367.2(VEGFA);NM_001025368.2(VEGFA);NM_001025369.2(VEGFA);NM_001025370.2(VEGFA);NM_001033756.2(VEGFA);NM_001171622.1(VEGFA);NM_001171623.1(VEGFA);NM_001171624.1(VEGFA);NM_001171625.1(VEGFA);NM_001171626.1(VEGFA);NM_001171627.1(VEGFA);NM_001171628.1(VEGFA);NM_001171629.1(VEGFA);NM_001171630.1(VEGFA);NM_001191322.1(GREM1);NM_001191323.1(GREM1);NM_001204384.1(VEGFA);NM_…
GO:1902897	regulation of postsynaptic density protein 95 clustering	biological_process	39	35266	41	98659	3.54e-17	2.78e-16	2.6611	NM_001281771.2(ZMYND8);NM_001281772.2(ZMYND8);NM_001281773.2(ZMYND8);NM_001281774.2(ZMYND8);NM_001281775.2(ZMYND8);NM_001281776.2(ZMYND8);NM_001281777.2(ZMYND8);NM_001281778.2(ZMYND8);NM_001281779.2(ZMYND8);NM_001281780.2(ZMYND8);NM_001281781.2(ZMYND8);NM_001281782.2(ZMYND8);NM_001281783.2(ZMYND8);NM_001281784.2(ZMYND8);NM_001792.3(CDH2);NM_012408.5(ZMYND8);NM_183047.3(ZMYND8);NM_183048.3(ZMYND8)…
GO:0043065	positive regulation of apoptotic process	biological_process	817	35266	1809	98659	3.98e-17	3.12e-16	1.26347	NM_000024.5(ADRB2);NM_000077.4(CDKN2A);NM_000104.3(CYP1B1);NM_000267.3(NF1);NM_000543.4(SMPD1);NM_000546.5(TP53);NM_000598.4(IGFBP3);NM_000600.3(IL6);NM_000876.2(IGF2R);NM_001005360.2(DNM2);NM_001005361.2(DNM2);NM_001005362.2(DNM2);NM_001006932.1(RPS6KA2);NM_001007156.2(NTRK3);NM_001007593.2(SMPD1);NM_001010927.2(TIAM2);NM_001012338.2(NTRK3);NM_001013398.1(IGFBP3);NM_001014431.1(AKT1);NM_00101443…
GO:0005829	cytosol	cellular_component	7691	35266	20100	98659	4.15e-17	3.25e-16	1.07045	NM_000014.4(A2M);NM_000028.2(AGL);NM_000033.3(ABCD1);NM_000034.3(ALDOA);NM_000037.3(ANK1);NM_000044.3(AR);NM_000048.3(ASL);NM_000050.4(ASS1);NM_000071.2(CBS);NM_000077.4(CDKN2A);NM_000109.3(DMD);NM_000113.2(TOR1A);NM_000121.3(EPOR);NM_000136.2(FANCC);NM_000143.3(FH);NM_000144.4(FXN);NM_000162.3(GCK);NM_000164.2(GIPR);NM_000168.5(GLI3);NM_000170.2(GLDC);NM_000175.3(GPI);NM_000177.4(GSN);NM_000178.…
.1(MYO1D);NM_001303429.1(PIK3R3);NM_001304275.1(RAPGEF1);NM_001304331.1(PPFIA4);NM_001304332.1(PPFIA4);NM_001304342.1(UBQLN4);NM_001304349.1(PRKACA);NM_001304367.1(CNBD2);NM_001304370.1(CENPM);NM_001304372.1(CENPM);NM_001304373.1(CENPM);NM_001304452.1(PGD);NM_001304459.1(ANKRD33);NM_001304460.1(ANKRD33);NM_001304521.1(IMPDH1);NM_001304523.1(MAD1L1);NM_001304524.1(MAD1L1);NM_001304525.1(MAD1L1);NM…
M_005249703.1(GLI3);XM_005249704.2(GLI3);XM_005249759.3(OGDH);XM_005249761.2(OGDH);XM_005249768.3(PDE1C);XM_005249838.3(UPP1);XM_005249862.3(CAMK2B);XM_005249864.3(CAMK2B);XM_005249877.1(MAD1L1);XM_005250084.1(RASA4B);XM_005250085.1(RASA4B);XM_005250104.1(RASA4);XM_005250150.1(CUX1);XM_005250151.1(CUX1);XM_005250154.3(CUX1);XM_005250314.1(IMPDH1);XM_005250713.1(CD36);XM_005250714.1(CD36);XM_00525…
2.1(NF1);XM_006721923.2(NF1);XM_006721924.1(NF1);XM_006721925.1(NF1);XM_006721926.2(NF1);XM_006721927.1(NF1);XM_006721928.2(NF1);XM_006721991.1(ARHGAP23);XM_006721992.2(ARHGAP23);XM_006721993.2(ARHGAP23);XM_006721994.2(ARHGAP23);XM_006721995.2(RNF213);XM_006721996.2(TNRC6C);XM_006721997.2(TNRC6C);XM_006721999.2(TNRC6C);XM_006722000.2(TNRC6C);XM_006722015.2(ENGASE);XM_006722016.2(ENGASE);XM_006722…
;XM_011527932.1(NWD1);XM_011527933.1(NWD1);XM_011527934.1(NWD1);XM_011527935.1(NWD1);XM_011527943.1(HOOK2);XM_011527944.1(HOOK2);XM_011527945.1(HOOK2);XM_011527946.1(HOOK2);XM_011527947.1(HOOK2);XM_011527990.1(JAK3);XM_011528029.1(MYO9B);XM_011528030.1(MYO9B);XM_011528031.1(MYO9B);XM_011528032.1(MYO9B);XM_011528033.1(MYO9B);XM_011528034.1(MYO9B);XM_011528035.1(MYO9B);XM_011528036.1(MYO9B);XM_0115…
6);XM_011548089.1(BAG6);XM_011548090.1(BAG6);XM_011548091.1(BAG6);XM_011548092.1(BAG6);XM_011548093.1(BAG6);XM_011548094.1(BAG6);XM_011548095.1(BAG6);XM_011548096.1(BAG6);XM_011548097.1(BAG6);XM_011548104.1(ATAT1);XM_011548205.1(DDAH2);XM_011548238.1(HSPA1L);XM_011548239.1(HSPA1L);XM_011548267.1(TRIM26);XM_011548277.1(BAG6);XM_011548278.1(BAG6);XM_011548279.1(BAG6);XM_011548280.1(BAG6);XM_0115482…
GO:0005200	structural constituent of cytoskeleton	molecular_function	322	35266	619	98659	4.2e-17	3.28e-16	1.45528	NM_000037.3(ANK1);NM_000109.3(DMD);NM_000347.5(SPTB);NM_000422.2(KRT17);NM_000424.3(KRT5);NM_000526.4(KRT14);NM_001003398.1(BICD1);NM_001005386.2(ACTR2);NM_001008844.1(DSP);NM_001018003.2(SORBS3);NM_001024858.2(SPTB);NM_001024959.2(ARPC4);NM_001101.3(ACTB);NM_001102610.1(TUBGCP5);NM_001105541.1(NEFM);NM_001121.2(ADD3);NM_001123066.3(MAPT);NM_001123067.3(MAPT);NM_001127493.1(ANK2);NM_001130438.2(S…
GO:0031253	cell projection membrane	cellular_component	72	35266	93	98659	4.22e-17	3.3e-16	2.16586	NM_001114135.3(DMTN);NM_001114136.2(DMTN);NM_001114137.2(DMTN);NM_001114138.2(DMTN);NM_001114139.2(DMTN);NM_001130487.1(NDRG4);NM_001167606.1(RAB35);NM_001199563.1(BVES);NM_001242833.1(NDRG4);NM_001242834.1(NDRG4);NM_001242835.1(NDRG4);NM_001242836.1(NDRG4);NM_001246.3(ENTPD2);NM_001286349.1(KIRREL);NM_001302816.1(DMTN);NM_001302817.1(DMTN);NM_001978.3(DMTN);NM_006861.6(RAB35);NM_007073.4(BVES);N…
GO:0008332	low voltage-gated calcium channel activity	molecular_function	48	35266	54	98659	4.61e-17	3.6e-16	2.48673	NM_001003406.1(CACNA1I);NM_001005407.1(CACNA1H);NM_001256324.1(CACNA1G);NM_001256325.1(CACNA1G);NM_001256326.1(CACNA1G);NM_001256327.1(CACNA1G);NM_001256328.1(CACNA1G);NM_001256329.1(CACNA1G);NM_001256330.1(CACNA1G);NM_001256331.1(CACNA1G);NM_001256332.1(CACNA1G);NM_001256333.1(CACNA1G);NM_001256334.1(CACNA1G);NM_001256359.1(CACNA1G);NM_001256360.1(CACNA1G);NM_001256361.1(CACNA1G);NM_018896.4(CAC…
GO:0007044	cell-substrate junction assembly	biological_process	48	35266	54	98659	4.61e-17	3.6e-16	2.48673	NM_002026.2(FN1);NM_002205.2(ITGA5);NM_006289.3(TLN1);NM_022648.4(TNS1);NM_054034.2(FN1);NM_212474.1(FN1);NM_212476.1(FN1);NM_212478.1(FN1);NM_212482.1(FN1);XM_005246397.1(FN1);XM_005246398.1(FN1);XM_005246399.1(FN1);XM_005246400.1(FN1);XM_005246401.1(FN1);XM_005246402.1(FN1);XM_005246403.1(FN1);XM_005246404.1(FN1);XM_005246405.1(FN1);XM_005246406.1(FN1);XM_005246407.1(FN1);XM_005246408.1(FN1);XM…
GO:0071526	semaphorin-plexin signaling pathway	biological_process	100	35266	144	98659	4.96e-17	3.87e-16	1.94275	NM_001005914.2(SEMA3B);NM_001024628.2(NRP1);NM_001024629.2(NRP1);NM_001031702.3(SEMA5B);NM_001110556.1(FLNA);NM_001130082.2(PLXNB1);NM_001142287.1(SEMA4D);NM_001146029.1(SEMA7A);NM_001146030.1(SEMA7A);NM_001163257.1(PLXNB3);NM_001178061.1(SEMA6C);NM_001178062.1(SEMA6C);NM_001185077.2(ARHGDIA);NM_001185078.2(ARHGDIA);NM_001193300.1(SEMA4A);NM_001193301.1(SEMA4A);NM_001193302.1(SEMA4A);NM_001244972…
GO:0008285	negative regulation of cell proliferation	biological_process	958	35266	2165	98659	7.64e-17	5.96e-16	1.23791	NM_000044.3(AR);NM_000077.4(CDKN2A);NM_000091.4(COL4A3);NM_000104.3(CYP1B1);NM_000168.5(GLI3);NM_000192.3(TBX5);NM_000209.3(PDX1);NM_000301.3(PLG);NM_000314.5(PTEN);NM_000314.6(PTEN);NM_000316.2(PTH1R);NM_000455.4(STK11);NM_000546.5(TP53);NM_000548.3(TSC2);NM_000598.4(IGFBP3);NM_000600.3(IL6);NM_000603.4(NOS3);NM_000620.4(NOS1);NM_000623.3(BDKRB2);NM_000636.2(SOD2);NM_000674.2(ADORA1);NM_000785.3…
GO:0042476	odontogenesis	biological_process	98	35266	141	98659	8.98e-17	7e-16	1.94441	NM_000141.4(FGFR2);NM_000259.3(MYO5A);NM_000325.5(PITX2);NM_000474.3(TWIST1);NM_000757.5(CSF1);NM_000919.3(PAM);NM_001006946.1(SDC1);NM_001123383.1(BCOR);NM_001123384.1(BCOR);NM_001123385.1(BCOR);NM_001142495.1(MYO5A);NM_001144917.1(FGFR2);NM_001144918.1(FGFR2);NM_001144919.1(FGFR2);NM_001177306.1(PAM);NM_001202.3(BMP4);NM_001204397.1(PITX2);NM_001204398.1(PITX2);NM_001206389.1(FGF8);NM_001651.3(…
GO:0030863	cortical cytoskeleton	cellular_component	101	35266	147	98659	1.14e-16	8.88e-16	1.92214	NM_000342.3(SLC4A1);NM_000625.4(NOS2);NM_001110556.1(FLNA);NM_001114135.3(DMTN);NM_001114136.2(DMTN);NM_001114137.2(DMTN);NM_001114138.2(DMTN);NM_001114139.2(DMTN);NM_001128827.1(DLG4);NM_001130969.1(NSMF);NM_001130970.1(NSMF);NM_001130971.1(NSMF);NM_001166005.1(EPB41);NM_001166007.1(EPB41);NM_001166116.1(TMOD1);NM_001166460.1(MPP1);NM_001166461.1(MPP1);NM_001166462.1(MPP1);NM_001178064.1(NSMF);N…
GO:0071773	cellular response to BMP stimulus	biological_process	105	35266	155	98659	1.47e-16	1.14e-15	1.89513	NM_001002295.1(GATA3);NM_001015051.3(RUNX2);NM_001024630.3(RUNX2);NM_001099640.1(TMEM100);NM_001105.4(ACVR1);NM_001111067.2(ACVR1);NM_001127217.2(SMAD9);NM_001202.3(BMP4);NM_001204.6(BMPR2);NM_001278478.1(RUNX2);NM_001718.4(BMP6);NM_001844.4(COL2A1);NM_002026.2(FN1);NM_002051.2(GATA3);NM_003012.4(SFRP1);NM_003924.3(PHOX2B);NM_004329.2(BMPR1A);NM_004980.4(KCND3);NM_005257.5(GATA6);NM_005905.5(SMAD…
GO:0046580	negative regulation of Ras protein signal transduction	biological_process	113	35266	171	98659	2.04e-16	1.59e-15	1.84868	NM_000267.3(NF1);NM_001004342.3(TRIM67);NM_001006617.1(MAPKAP1);NM_001006618.1(MAPKAP1);NM_001006619.1(MAPKAP1);NM_001006620.1(MAPKAP1);NM_001006621.1(MAPKAP1);NM_001042492.2(NF1);NM_001079877.2(RASA4);NM_001128147.2(NF1);NM_001193357.1(NUP62);NM_001193520.1(RASAL1);NM_001193521.1(RASAL1);NM_001277335.1(RASA4B);NM_001287062.1(RABGEF1);NM_001300889.1(TRIM67);NM_001301202.1(RASAL1);NM_001304275.1(R…
GO:0097109	neuroligin family protein binding	molecular_function	79	35266	107	98659	2.18e-16	1.7e-15	2.06549	NM_001105250.2(NRXN3);NM_001128827.1(DLG4);NM_001135659.1(NRXN1);NM_001272020.1(NRXN3);NM_001365.3(DLG4);NM_004796.5(NRXN3);NM_004801.4(NRXN1);NM_015080.3(NRXN2);NM_018968.3(SNTG2);NM_138732.2(NRXN2);NM_138734.2(NRXN2);NM_138735.2(NRXN1);NM_138970.4(NRXN3);XM_005256489.2(DLG4);XM_005256491.1(DLG4);XM_005256492.1(DLG4);XM_005256493.3(DLG4);XM_005256494.2(DLG4);XM_005264642.2(NRXN1);XM_005264643.2(…
GO:0098815	modulation of excitatory postsynaptic potential	biological_process	34	35266	35	98659	2.28e-16	1.77e-15	2.71764	NM_001281771.2(ZMYND8);NM_001281772.2(ZMYND8);NM_001281773.2(ZMYND8);NM_001281774.2(ZMYND8);NM_001281775.2(ZMYND8);NM_001281776.2(ZMYND8);NM_001281777.2(ZMYND8);NM_001281778.2(ZMYND8);NM_001281779.2(ZMYND8);NM_001281780.2(ZMYND8);NM_001281781.2(ZMYND8);NM_001281782.2(ZMYND8);NM_001281783.2(ZMYND8);NM_001281784.2(ZMYND8);NM_012408.5(ZMYND8);NM_183047.3(ZMYND8);NM_183048.3(ZMYND8);XM_005260356.3(ZM…
GO:0030426	growth cone	cellular_component	411	35266	832	98659	2.29e-16	1.78e-15	1.38197	NM_000113.2(TOR1A);NM_000259.3(MYO5A);NM_001001502.1(SNCB);NM_001002837.2(INPP5J);NM_001005360.2(DNM2);NM_001005361.2(DNM2);NM_001005362.2(DNM2);NM_001007097.2(NTRK2);NM_001008701.2(ADGRL1);NM_001010927.2(TIAM2);NM_001018065.2(NTRK2);NM_001018066.2(NTRK2);NM_001024628.2(NRP1);NM_001024629.2(NRP1);NM_001039590.2(USP9X);NM_001039591.2(USP9X);NM_001077186.1(MYH14);NM_001079533.1(CPEB1);NM_001079534.…
GO:0010882	regulation of cardiac muscle contraction by calcium ion signaling	biological_process	50	35266	58	98659	2.36e-16	1.83e-15	2.4117	NM_001035.2(RYR2);NM_001112800.1(SLC8A1);NM_001112801.1(SLC8A1);NM_001112802.1(SLC8A1);NM_001127493.1(ANK2);NM_001148.4(ANK2);NM_001252624.1(SLC8A1);NM_001677.3(ATP1B1);NM_003047.4(SLC9A1);NM_006037.3(HDAC4);NM_020977.3(ANK2);NM_021097.2(SLC8A1);XM_005262942.3(ANK2);XM_005262945.1(ANK2);XM_005262948.3(ANK2);XM_006711802.2(RYR2);XM_006711803.2(RYR2);XM_006711804.2(RYR2);XM_006711805.2(RYR2);XM_006…
GO:0032886	regulation of microtubule-based process	biological_process	75	35266	100	98659	2.53e-16	1.96e-15	2.09818	NM_001079812.2(DIAPH1);NM_001127511.2(APC);NM_001146156.1(GSK3B);NM_001207044.1(CLASP2);NM_002093.3(GSK3B);NM_005219.4(DIAPH1);NM_012090.5(MACF1);NM_015097.2(CLASP2);NM_019090.2(MAP10);XM_005268384.2(DIAPH1);XM_005270694.1(MACF1);XM_005270695.1(MACF1);XM_005270696.1(MACF1);XM_005270697.1(MACF1);XM_005270698.1(MACF1);XM_005270700.1(MACF1);XM_006710519.1(MACF1);XM_006710520.1(MACF1);XM_006710521.1(…
GO:0035025	positive regulation of Rho protein signal transduction	biological_process	75	35266	100	98659	2.53e-16	1.96e-15	2.09818	NM_001112732.2(MCF2L);NM_001145770.2(ADGRG1);NM_001145771.2(ADGRG1);NM_001145772.2(ADGRG1);NM_001145773.2(ADGRG1);NM_001145774.2(ADGRG1);NM_001270546.1(AKAP13);NM_001290142.1(ADGRG1);NM_001290143.1(ADGRG1);NM_001290144.1(ADGRG1);NM_002507.3(NGFR);NM_004041.4(ARRB1);NM_005682.6(ADGRG1);NM_005683.3(GPR55);NM_006738.5(AKAP13);NM_007200.4(AKAP13);NM_020251.3(ARRB1);NM_024979.4(MCF2L);NM_139166.4(ABRA…
GO:0030007	cellular potassium ion homeostasis	biological_process	64	35266	81	98659	2.9e-16	2.24e-15	2.21042	NM_000702.3(ATP1A2);NM_000704.2(ATP4A);NM_001014797.2(KCNMA1);NM_001161352.1(KCNMA1);NM_001161353.1(KCNMA1);NM_001185085.1(ATP12A);NM_001221.3(CAMK2D);NM_001256213.1(ATP1A3);NM_001256214.1(ATP1A3);NM_001271518.1(KCNMA1);NM_001271519.1(KCNMA1);NM_001676.5(ATP12A);NM_001677.3(ATP1B1);NM_001678.4(ATP1B2);NM_002247.3(KCNMA1);NM_144699.3(ATP1A4);NM_152296.4(ATP1A3);NM_172114.1(CAMK2D);NM_172115.2(CAMK…
[truncated: 11,042 more rows]
